# Supplementary material
Source: PubMed Central journal article supplement (PMC4918641)

WL717IIH  
WL717II

8.23 7.74 7.72 7.49 7.49 7.47 7.44 7.37 7.35 7.28 7.25 7.07 7.06 7.01 6.61 5.58 5.55 4.52 4.38 4.34 4.32 4.26 4.24 4.20 4.13 4.10 4.08 3.14 3.11 3.10 3.04 3.01 2.96 2.26 1.44

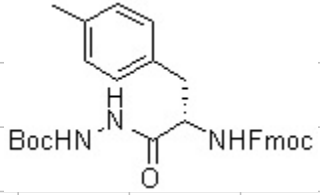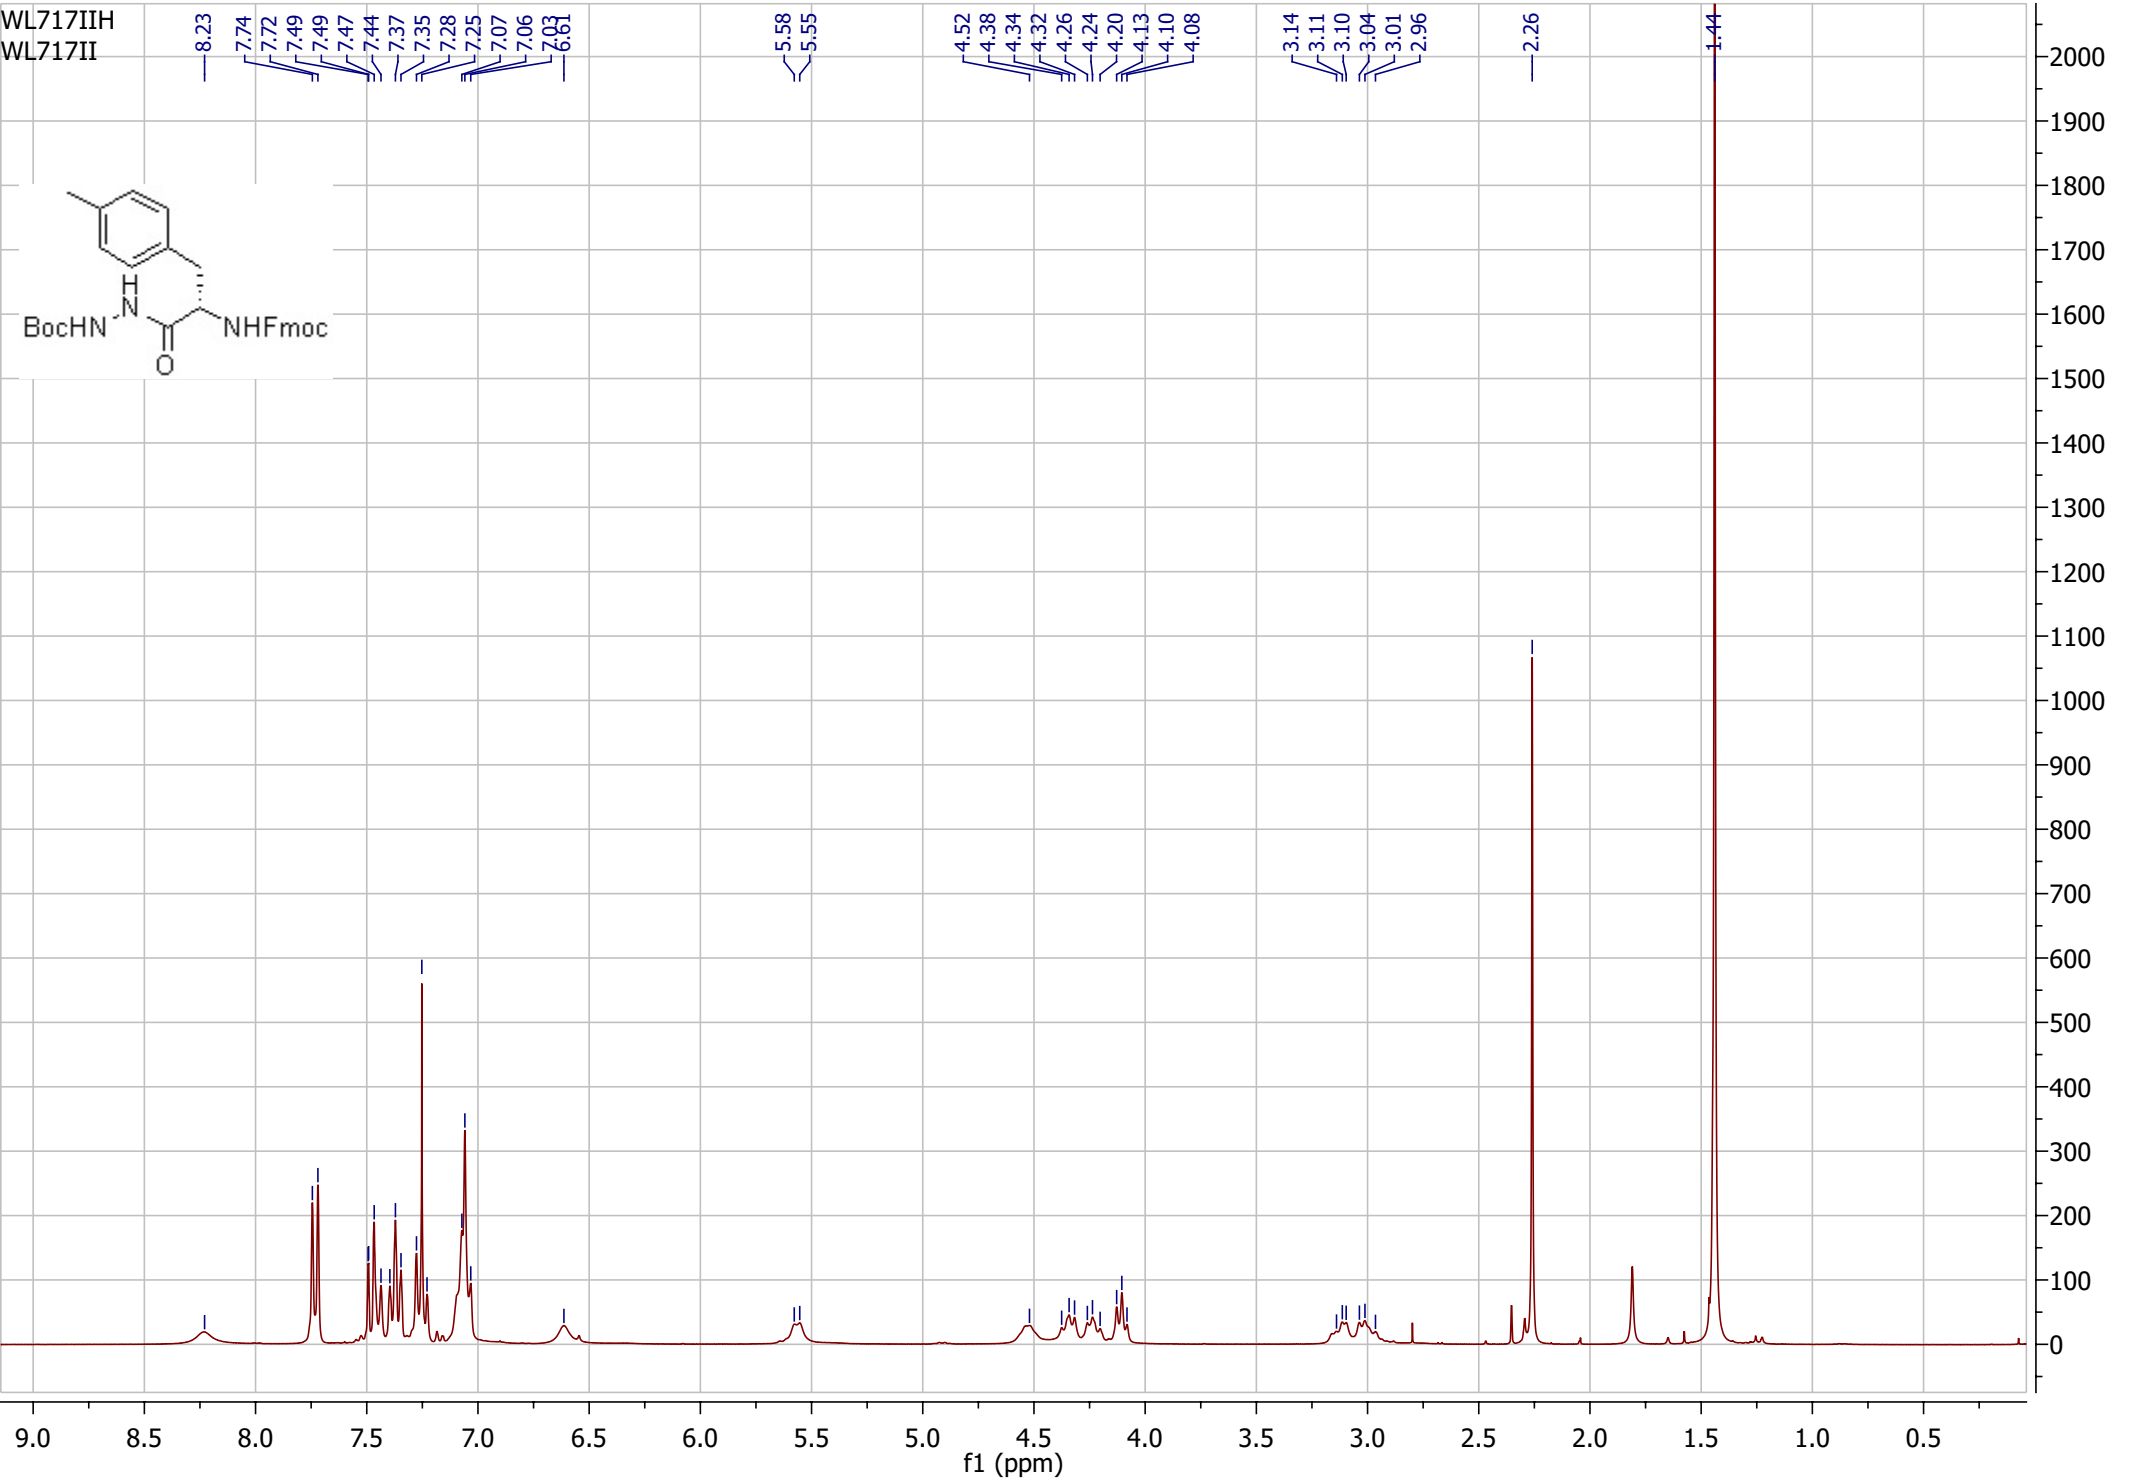

WL717IIC

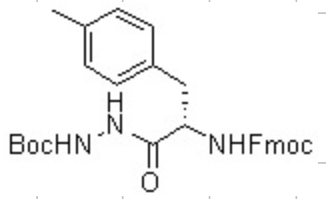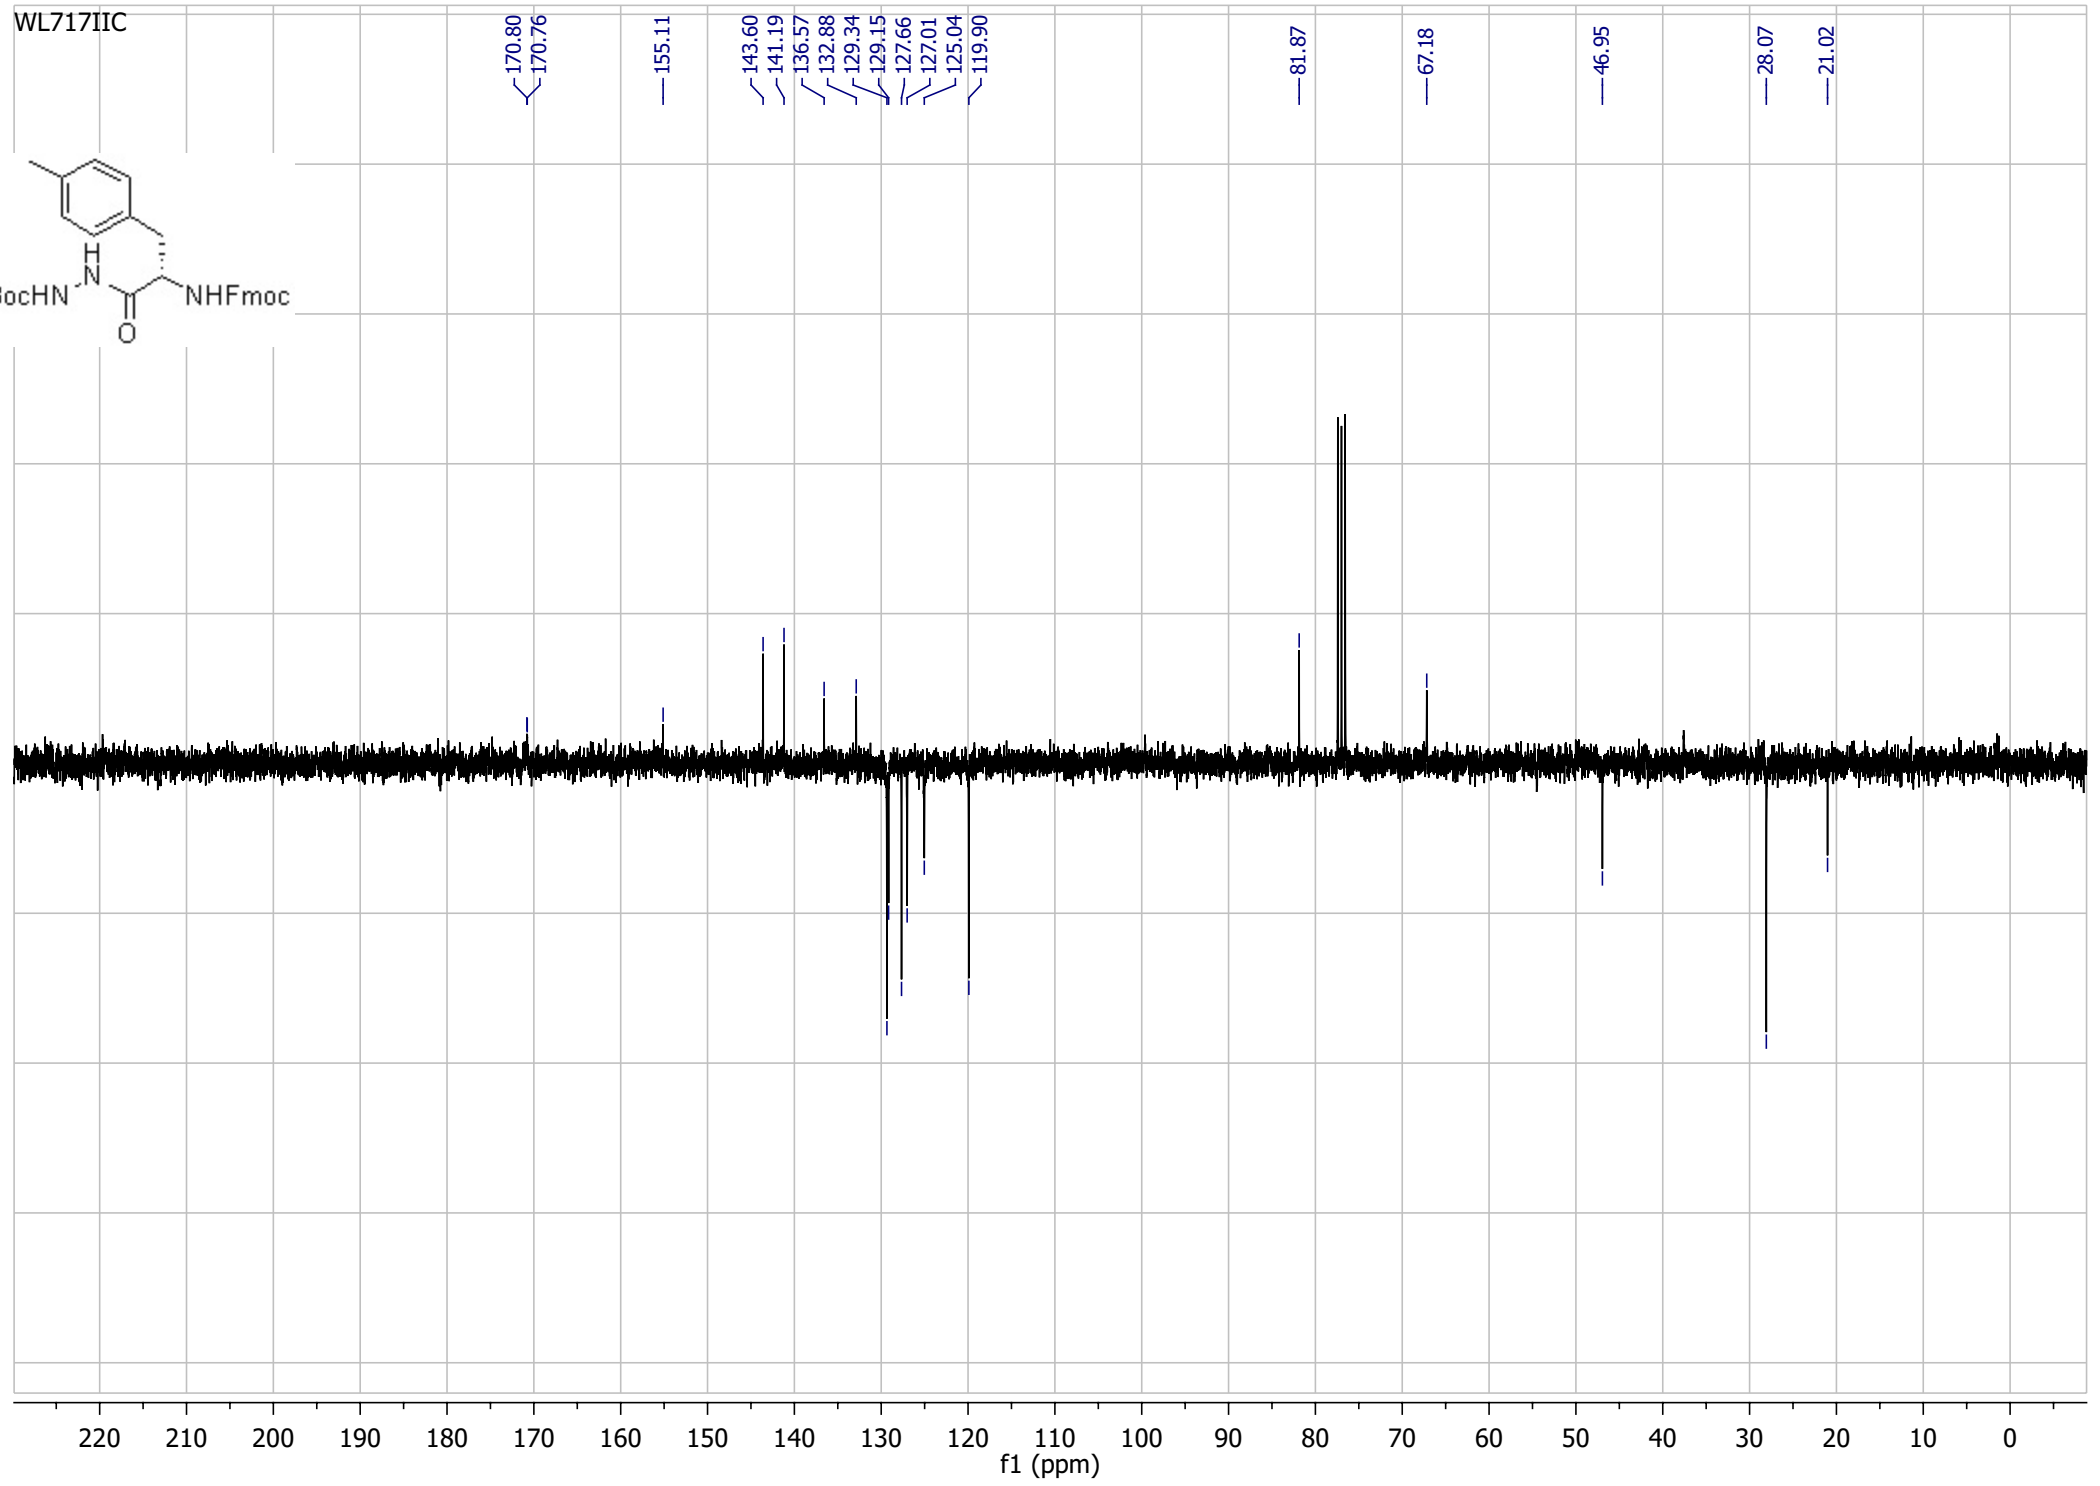

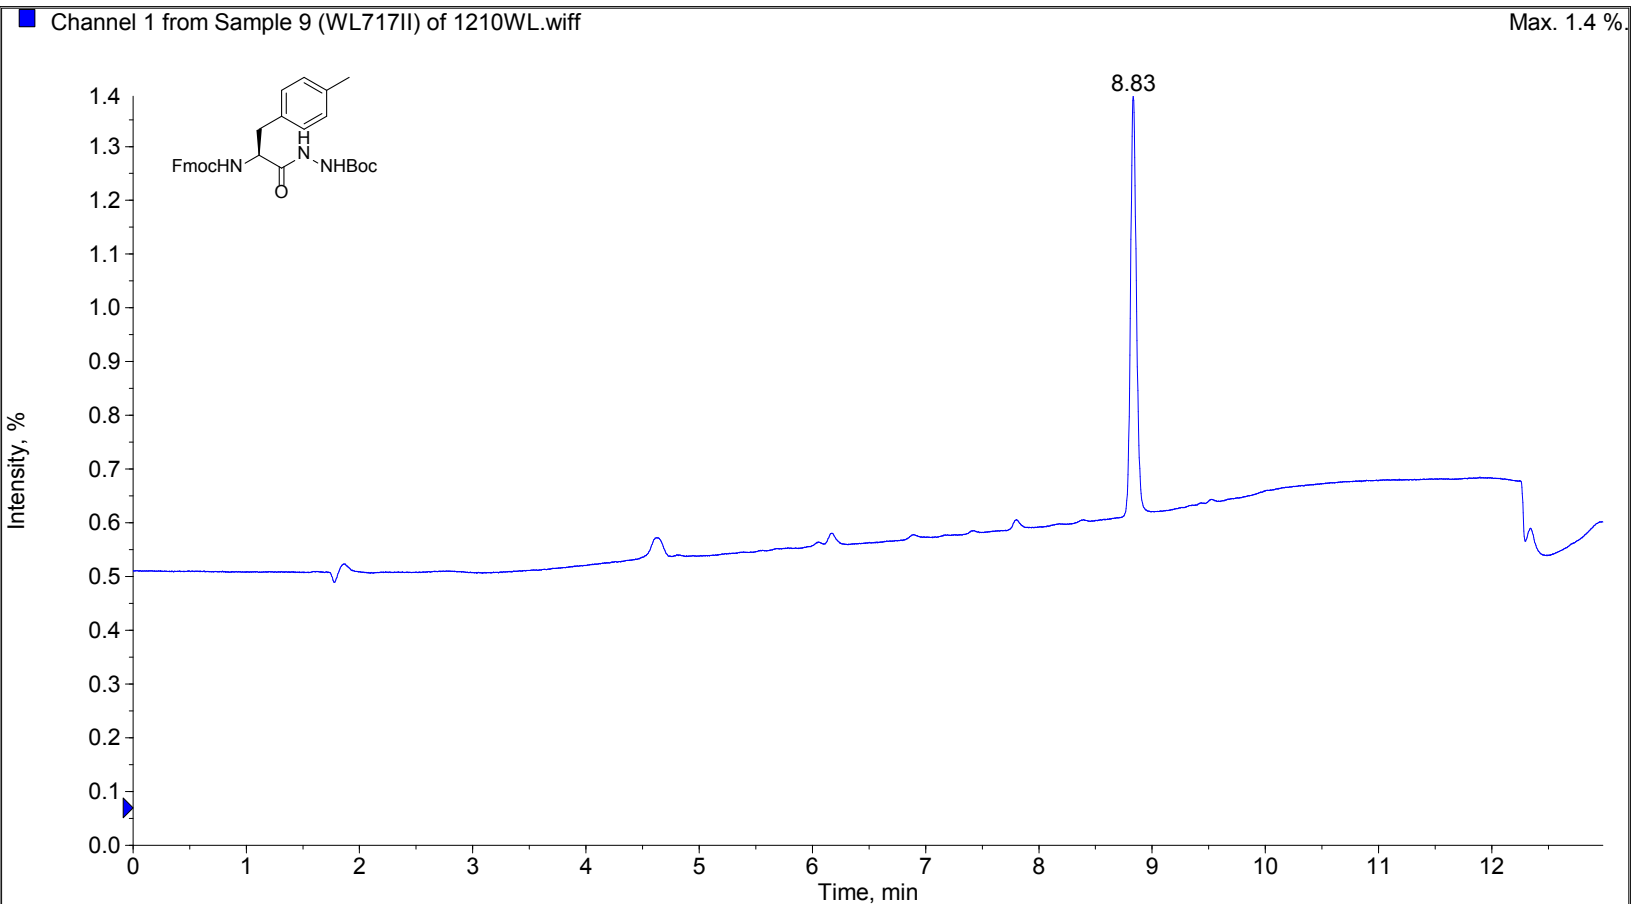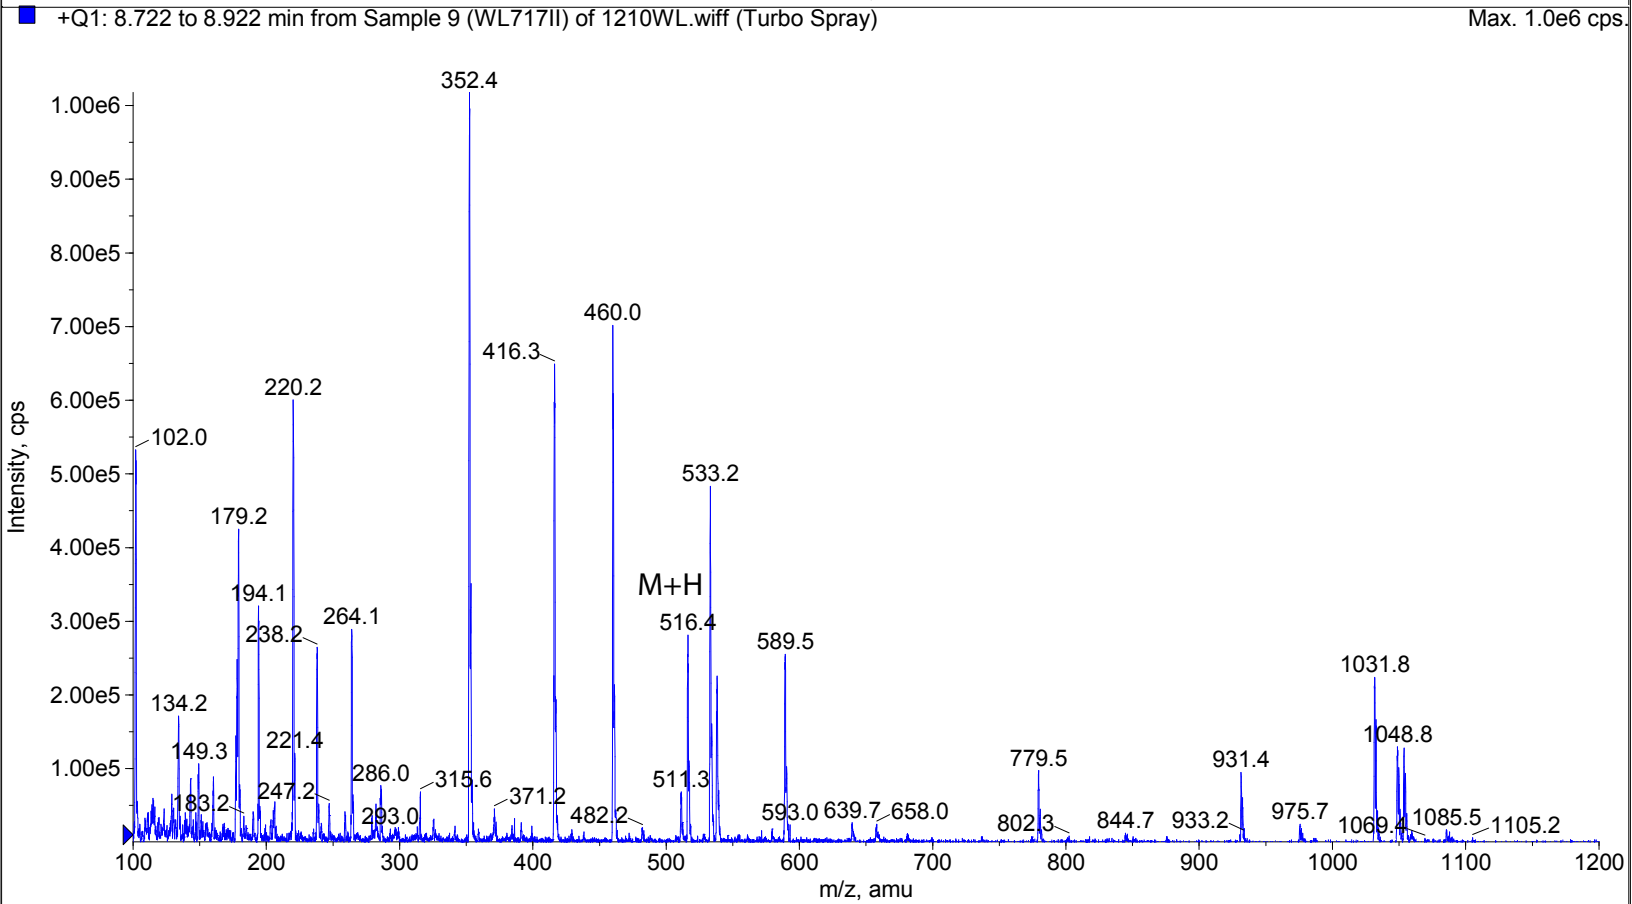

WL730H2  
STANDARD 1H OBSERVE

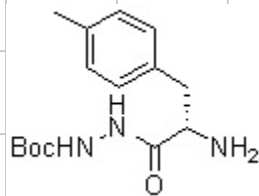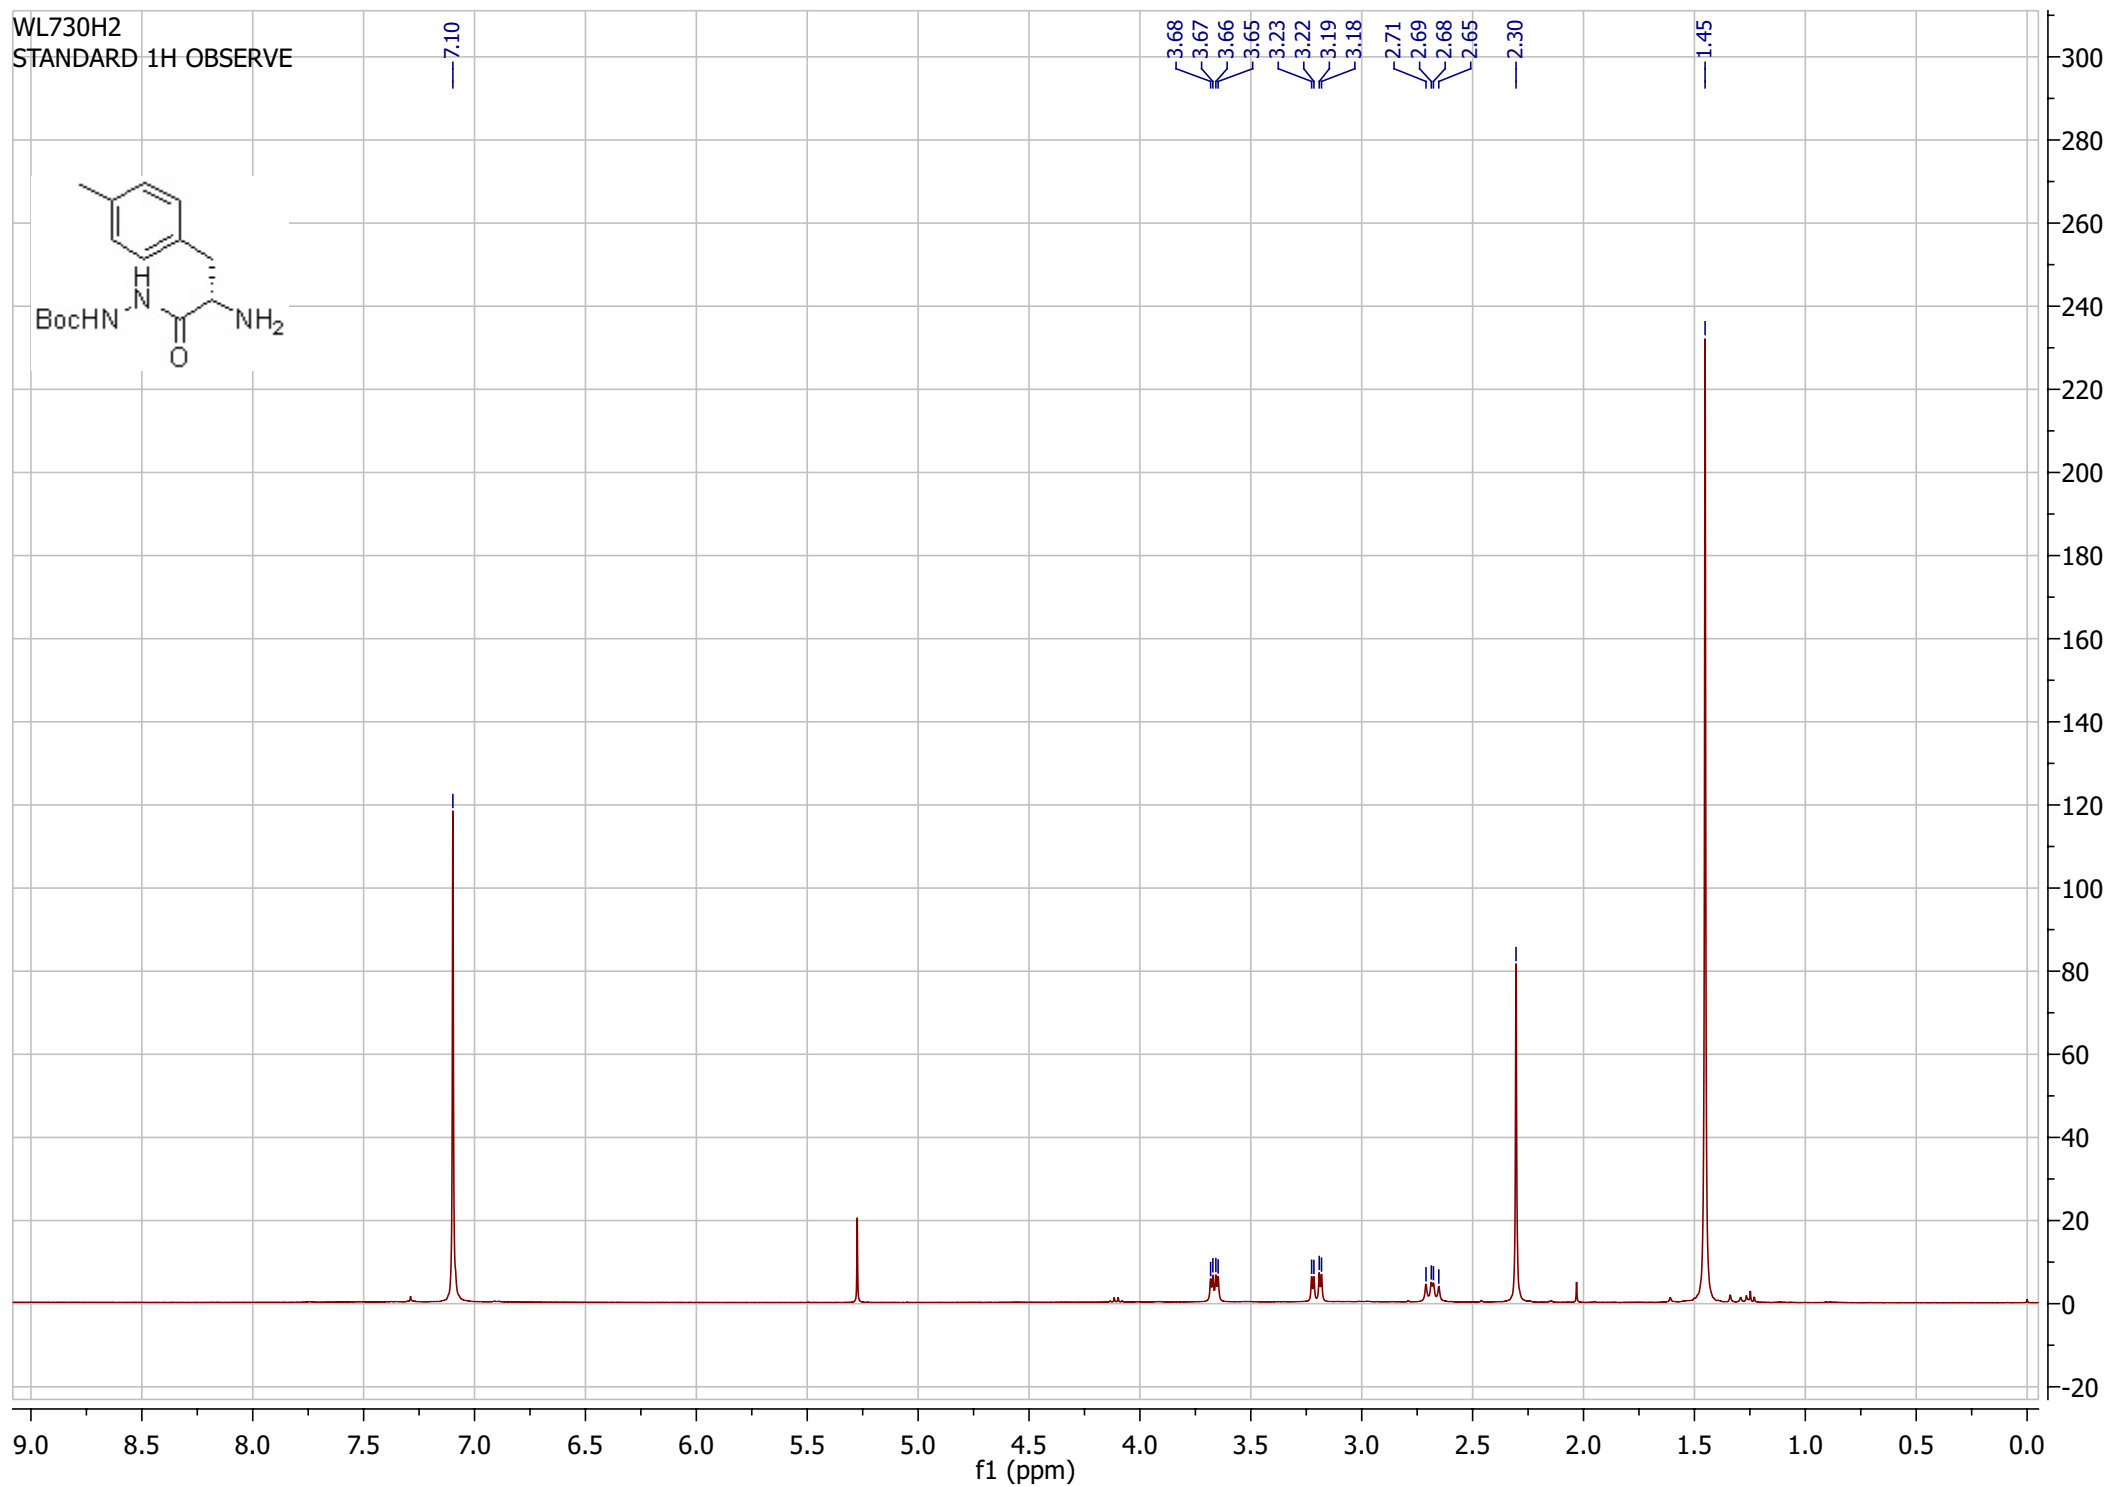

WL730C  
13C OBSERVE

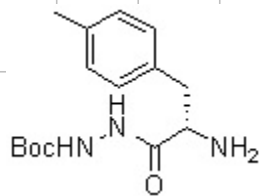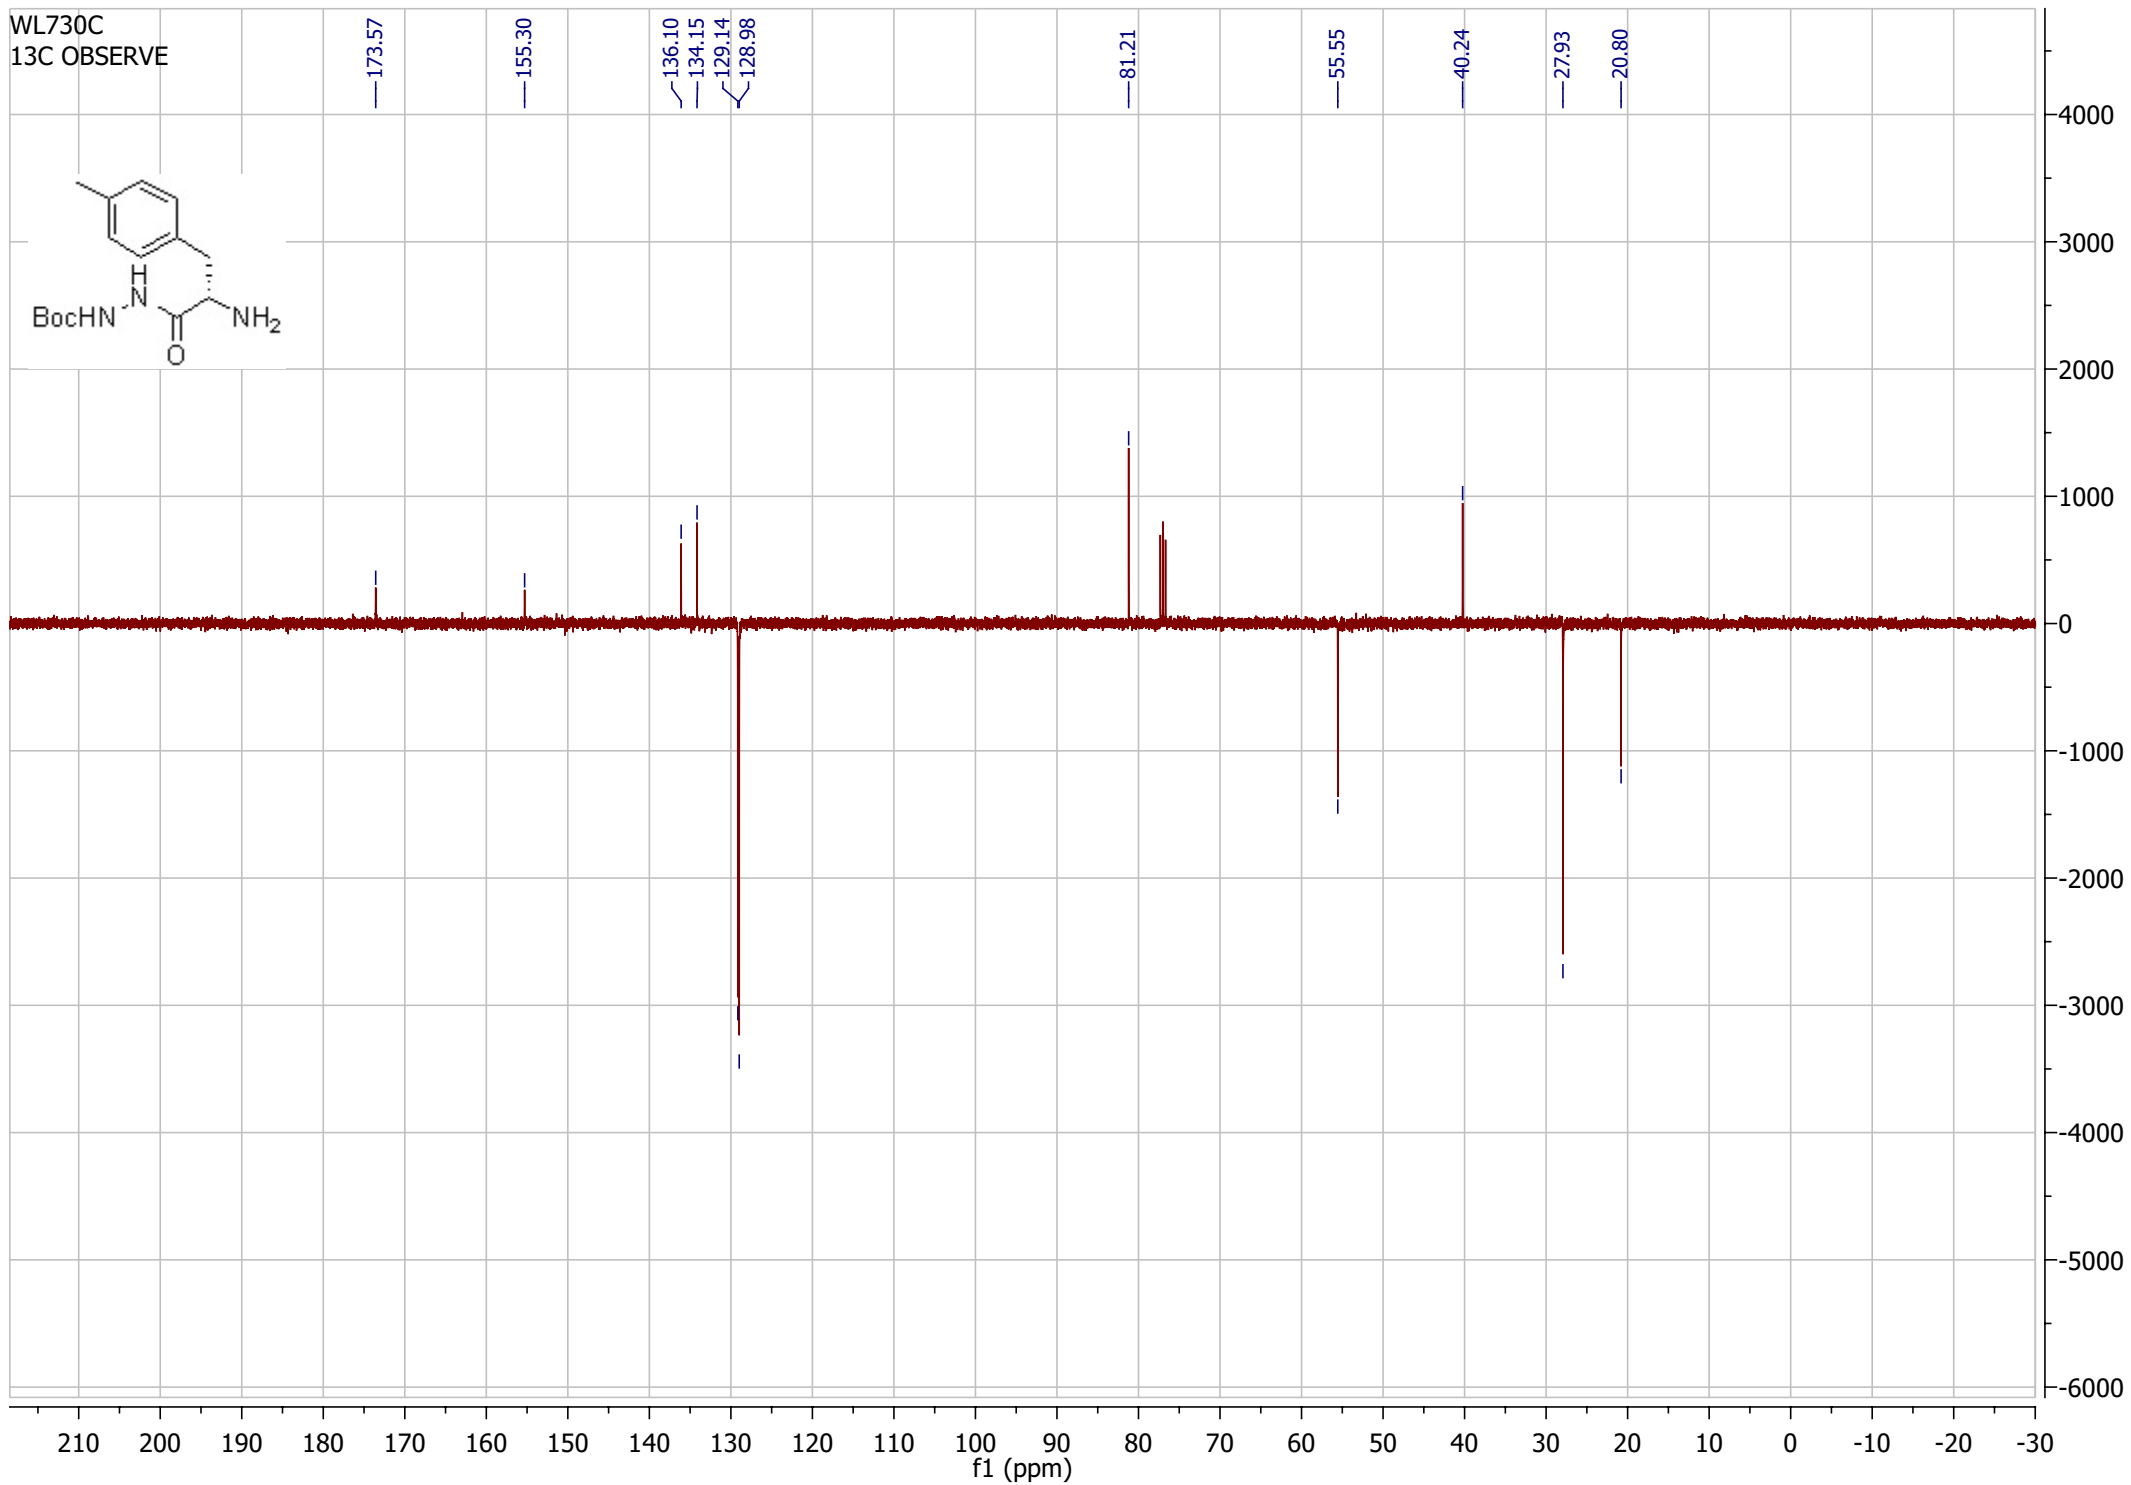

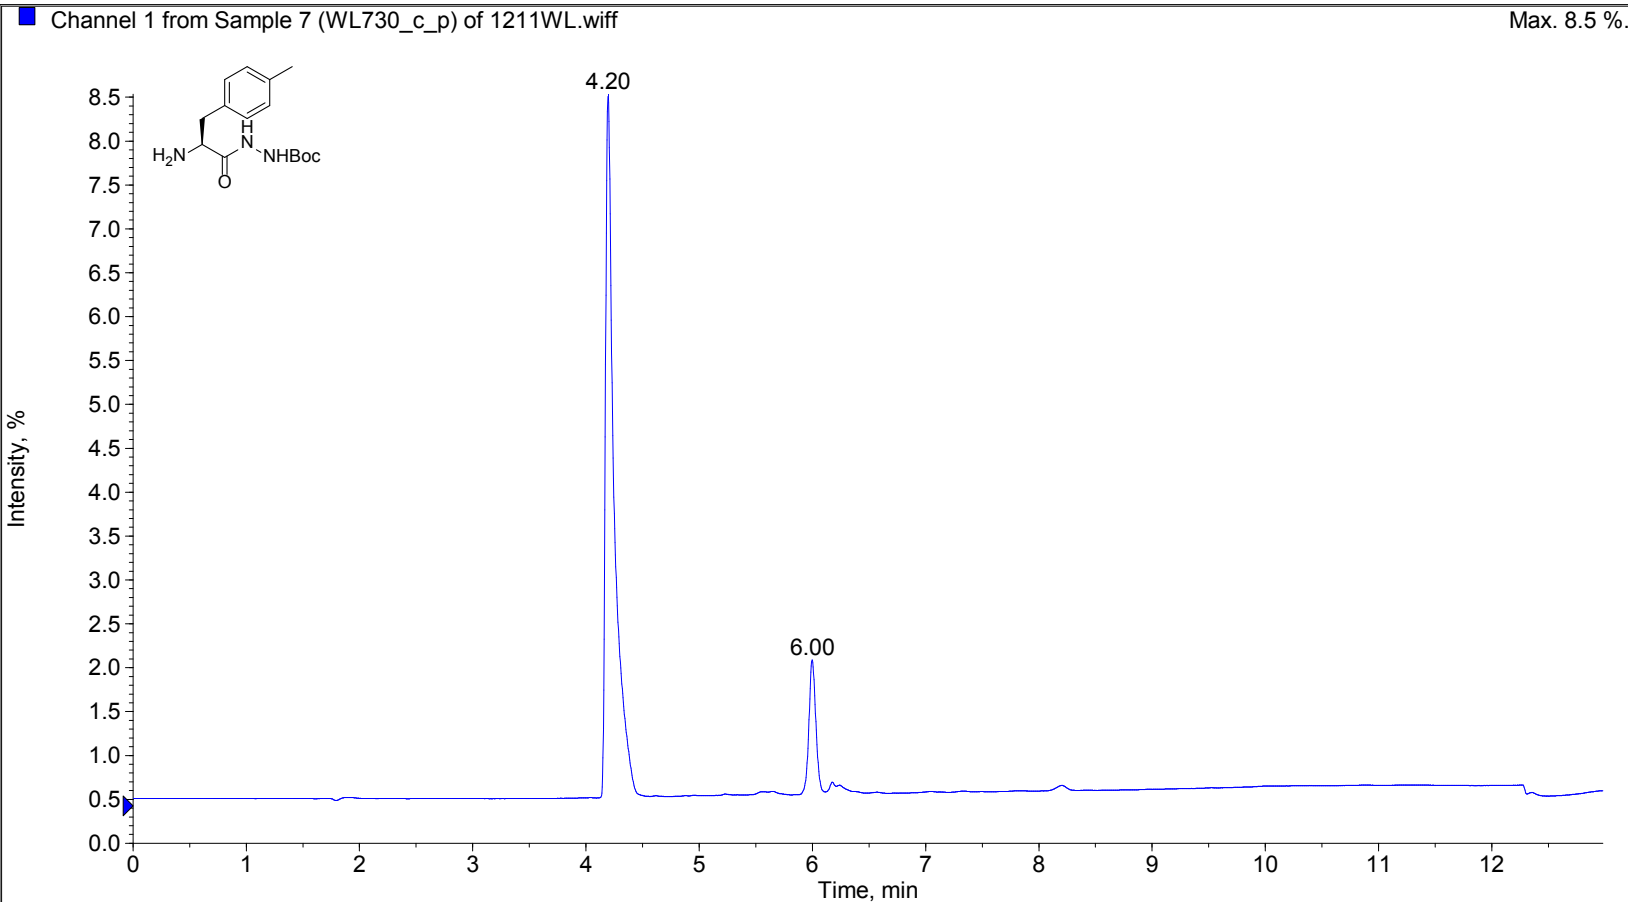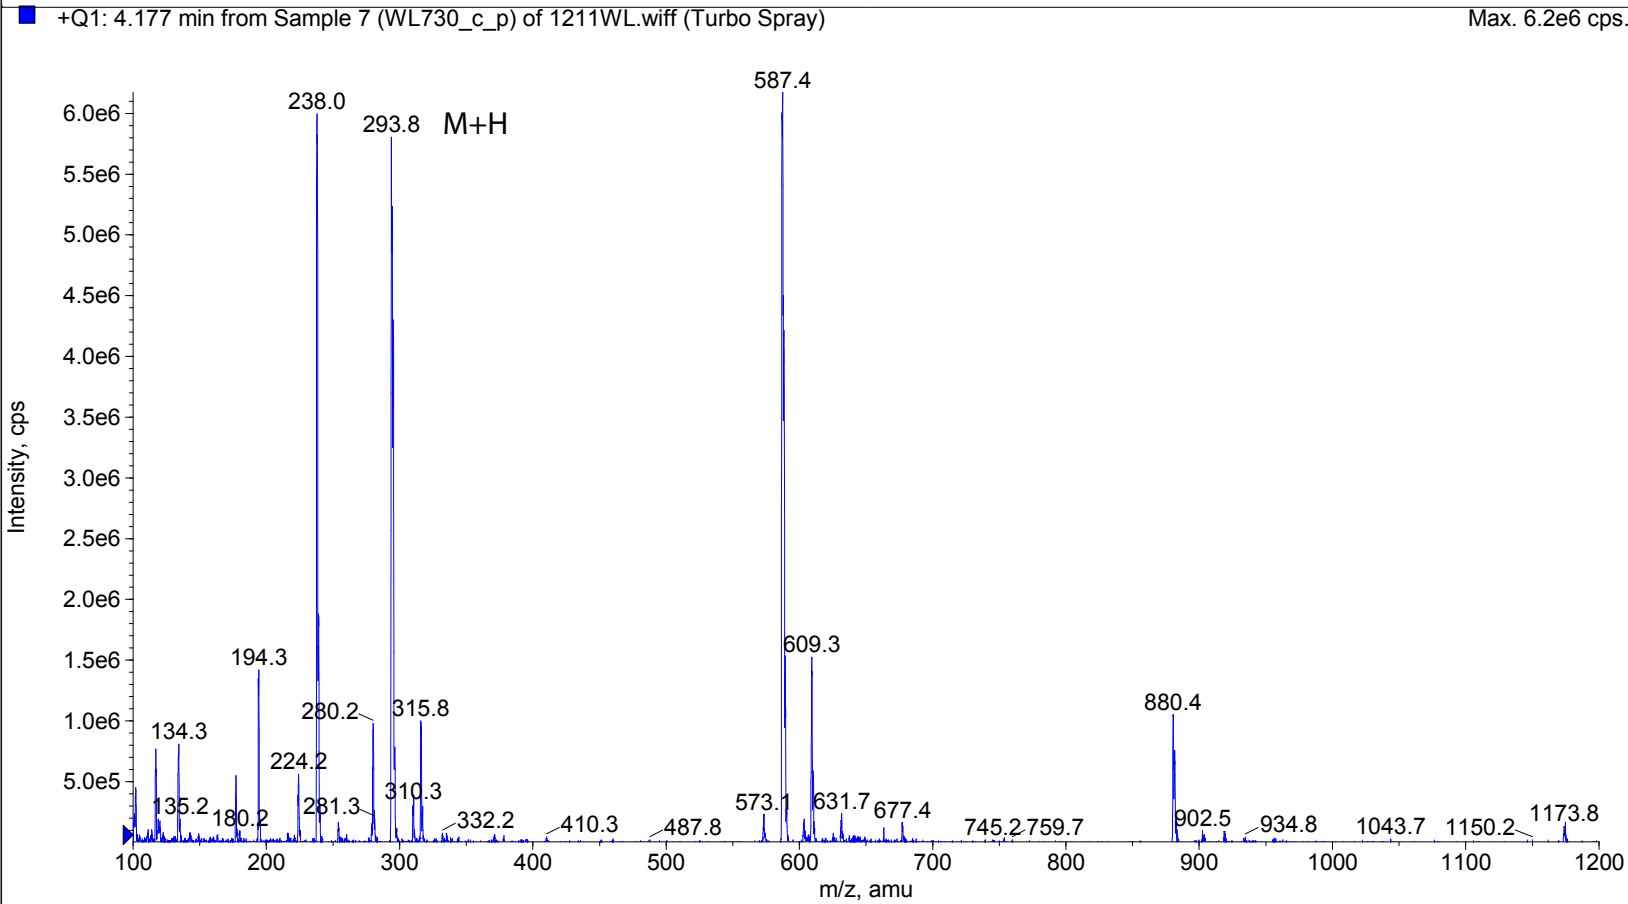

W5734I1H  
STANDARD 1H OBSERVE

7.16  
7.14  
7.09  
7.07  
7.06  
7.04

4.83

4.24  
4.23  
4.22  
4.22  
4.21  
4.20  
4.20

3.58  
3.57

3.25  
3.23  
3.21  
3.20

2.98  
2.95  
2.94  
2.92

2.31

1.46  
1.46  
1.30  
1.28  
1.26  
1.26

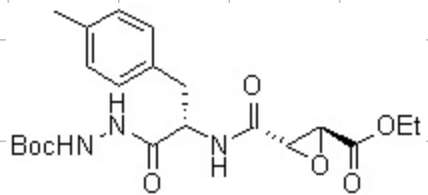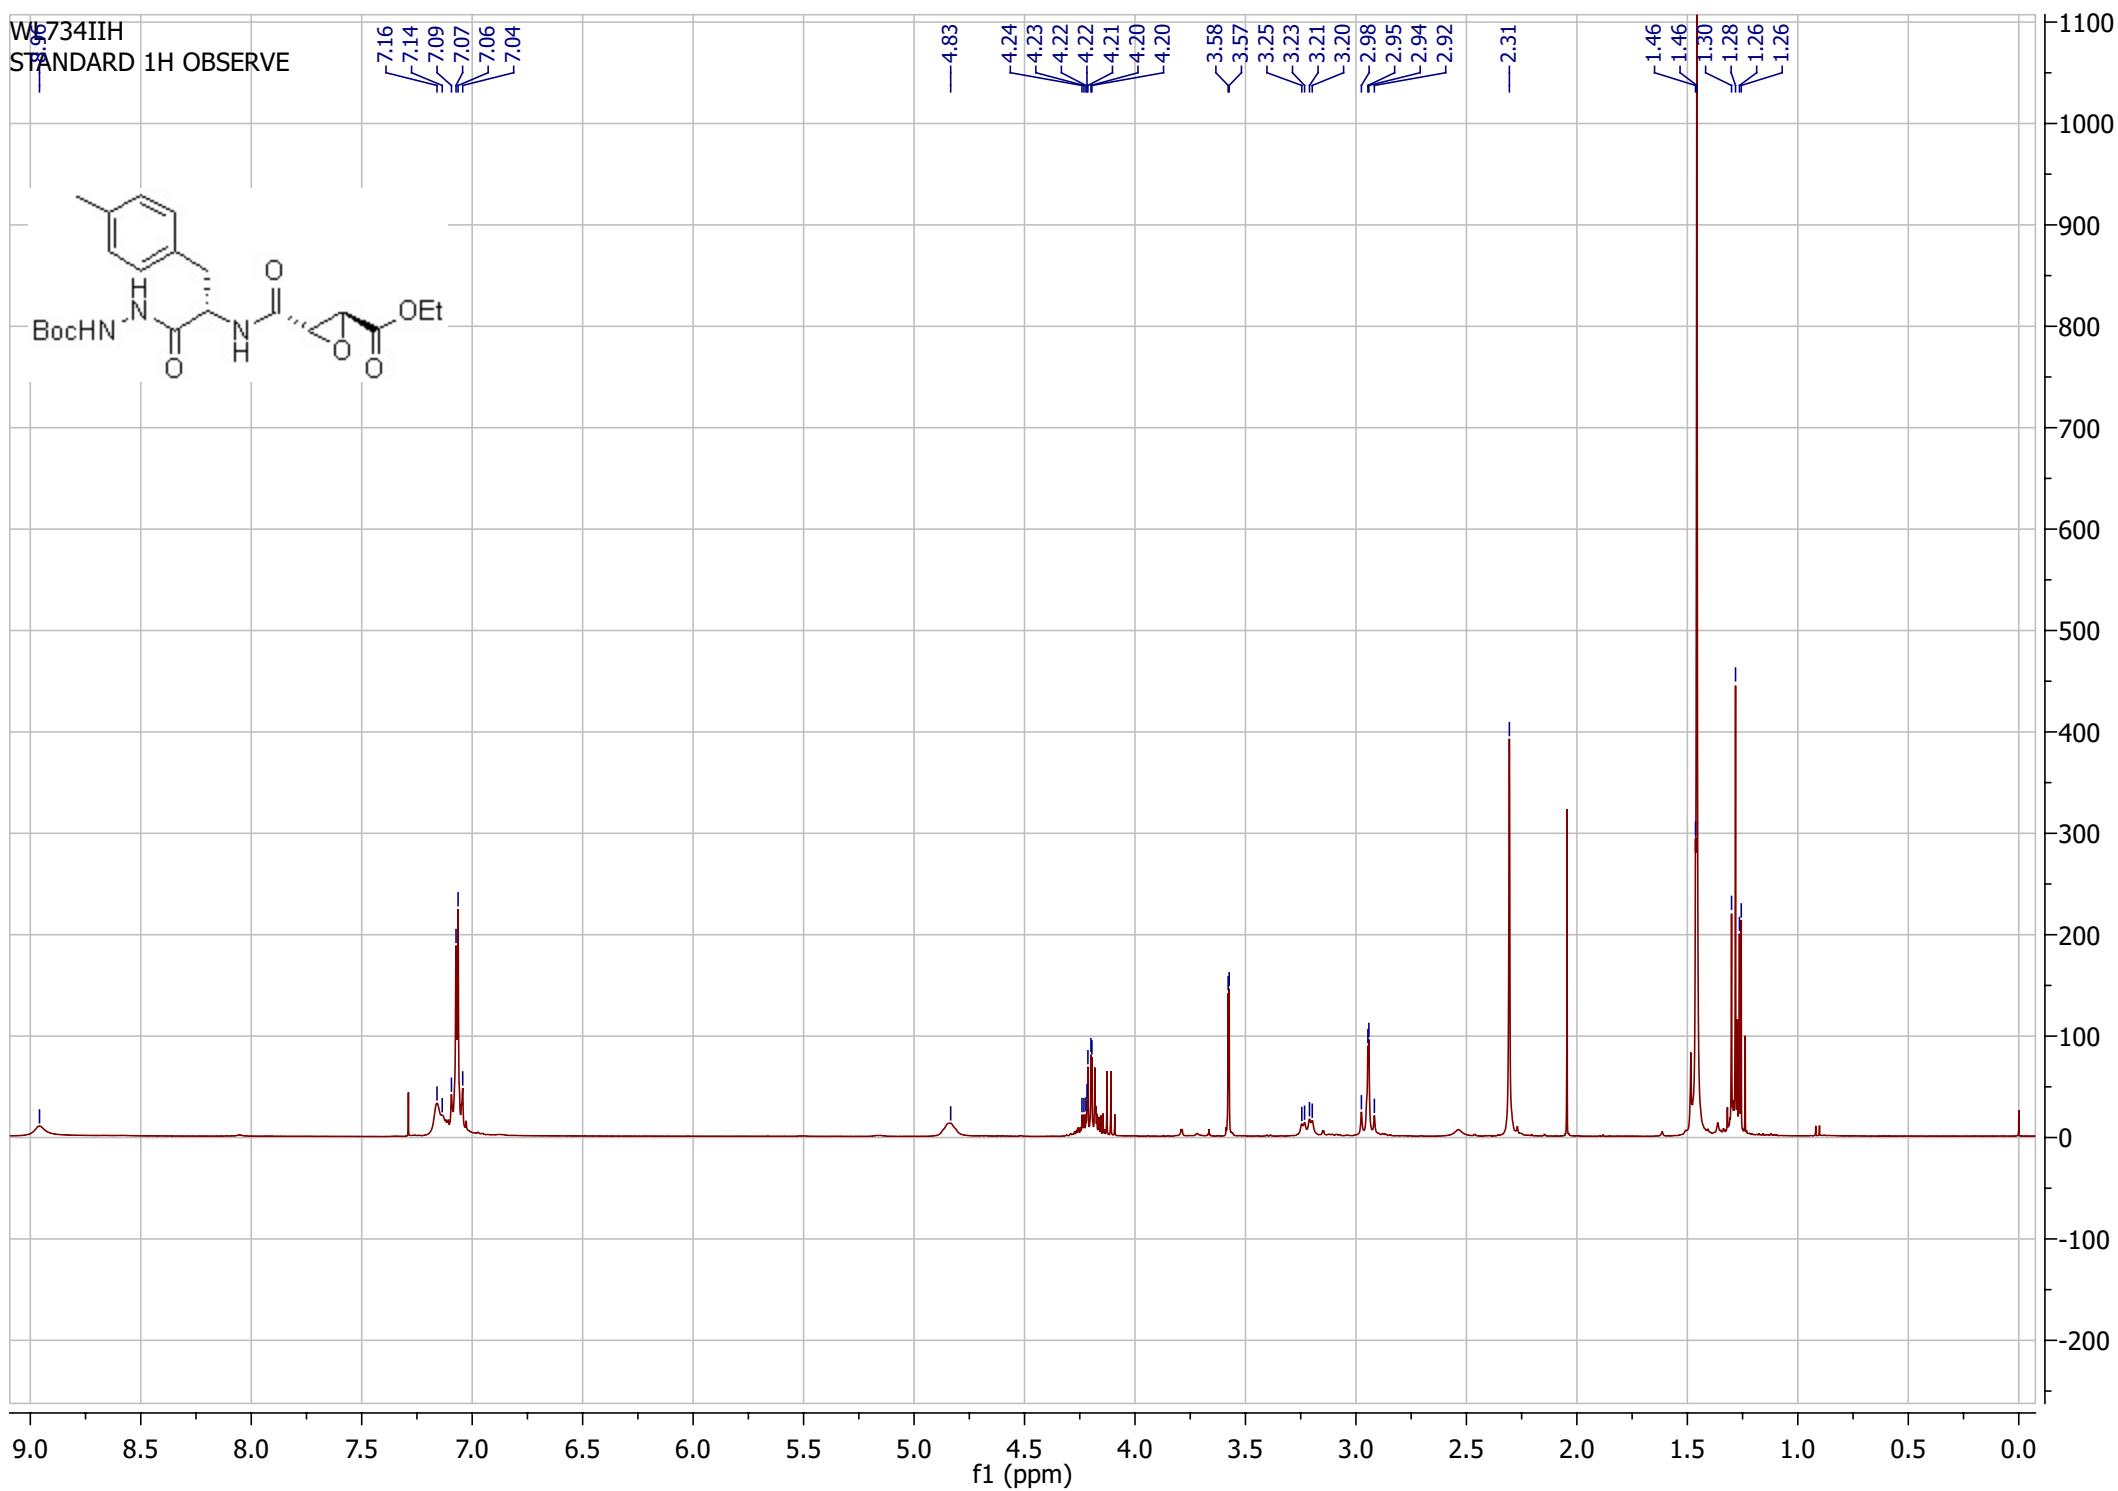

WL734IIC  
13C OBSERVE

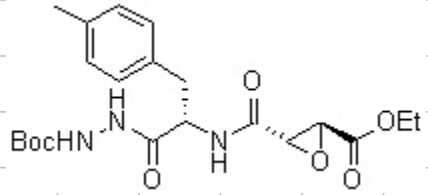

170.33  
166.53  
166.49

155.38

136.53  
132.78  
129.16  
129.03

81.69

62.04

53.52  
52.44  
51.97

28.01

20.88

13.85

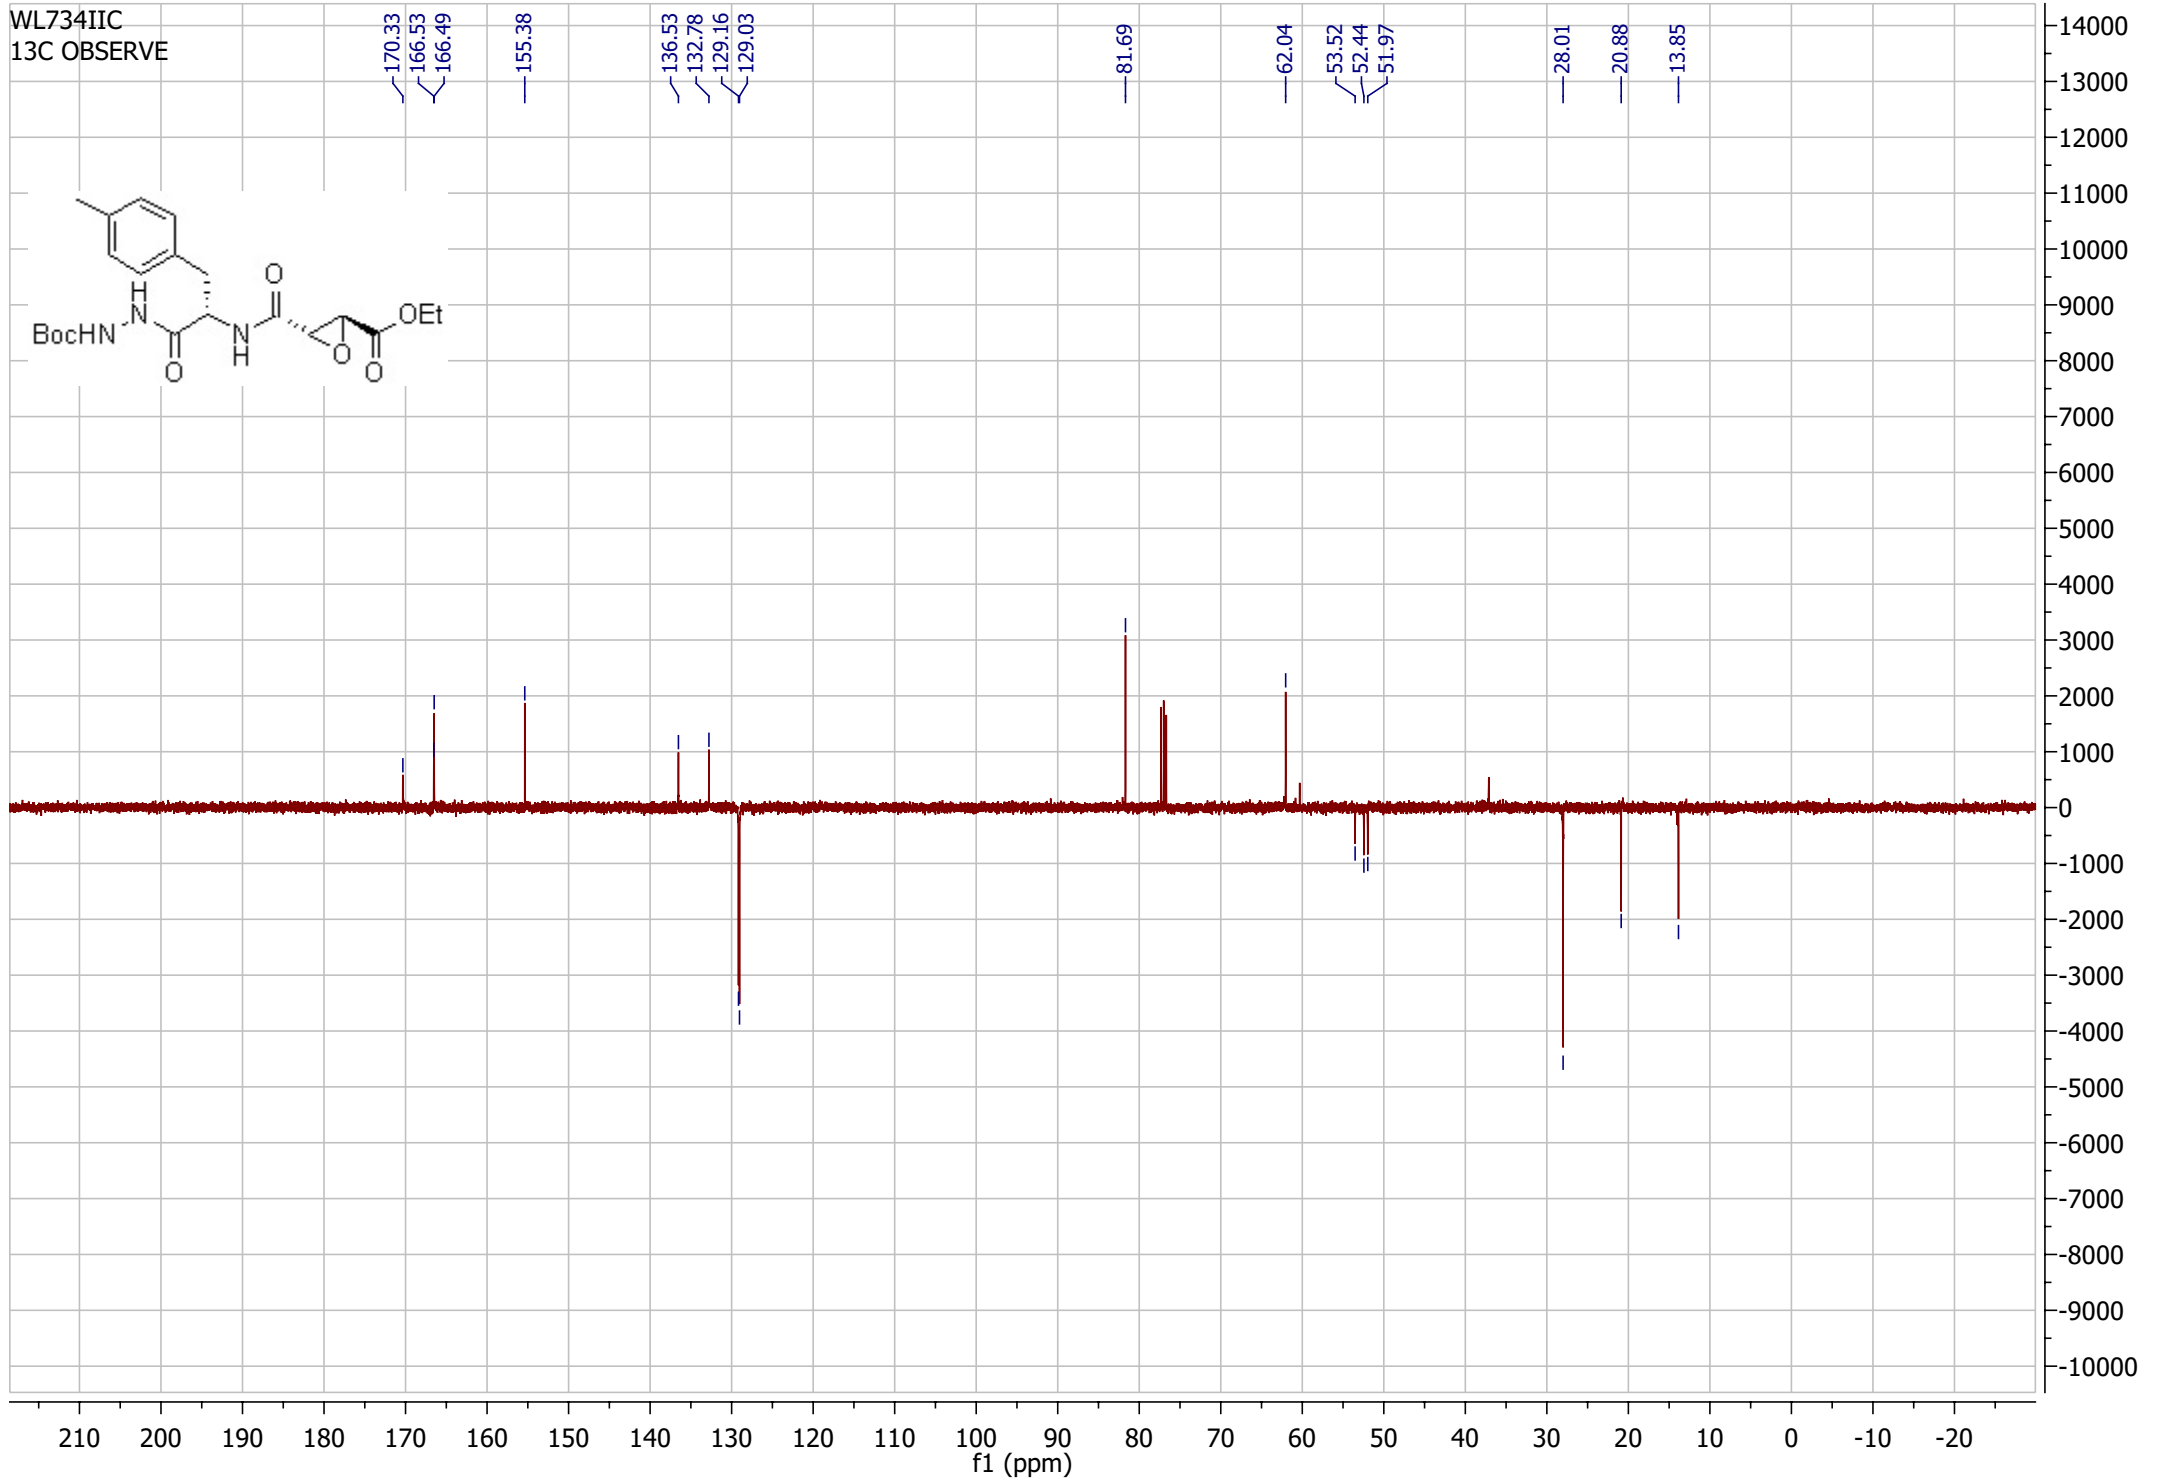



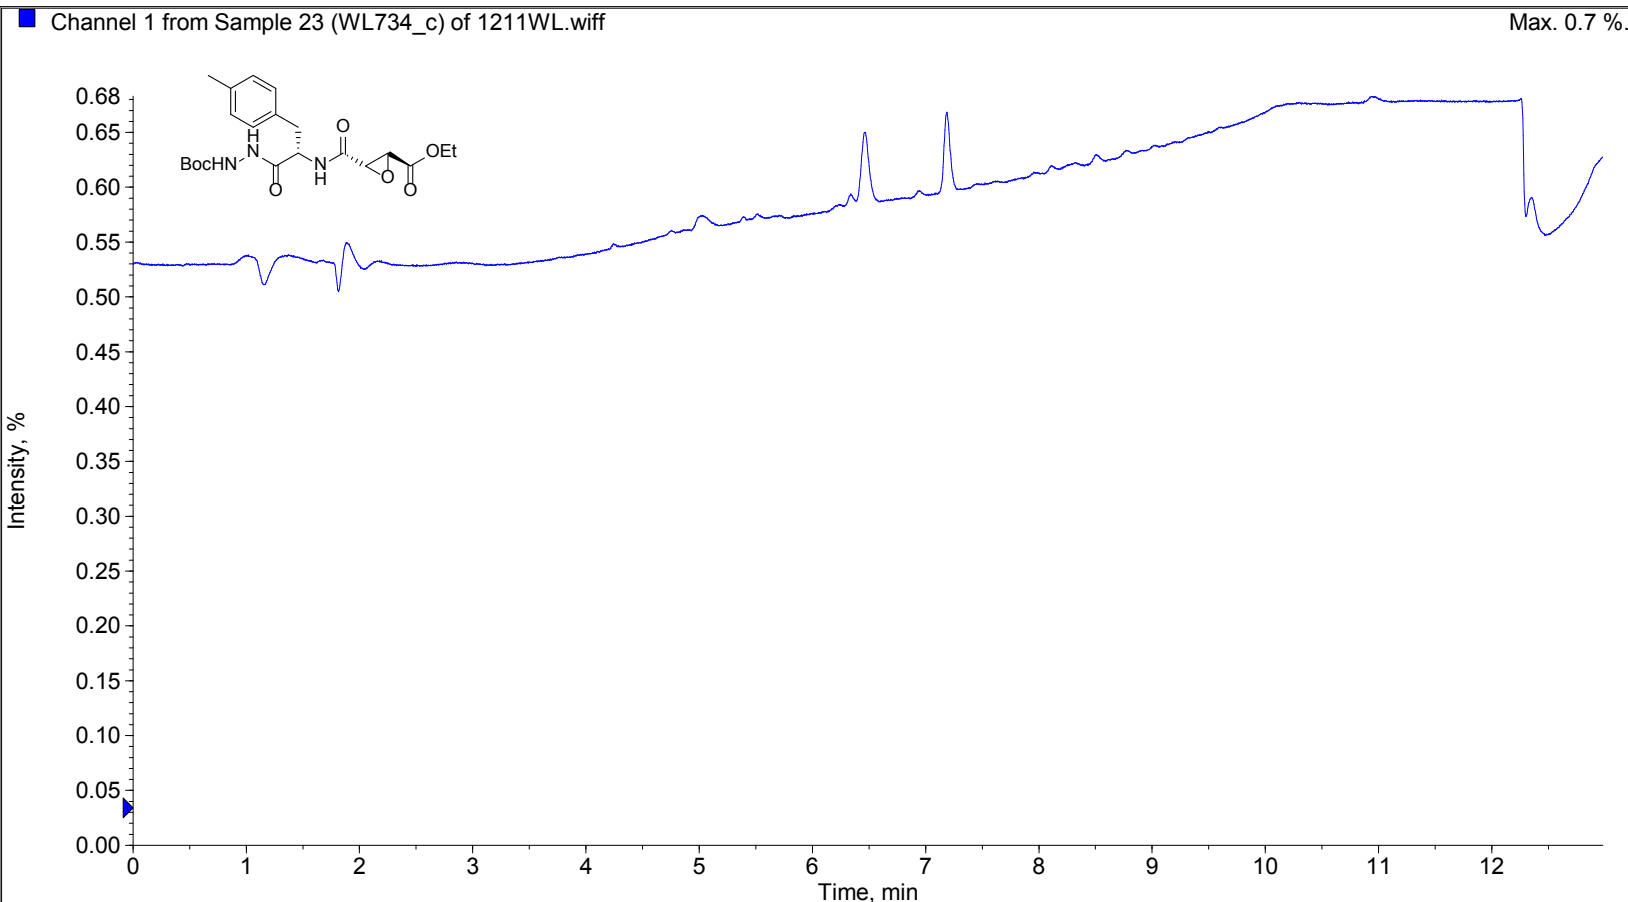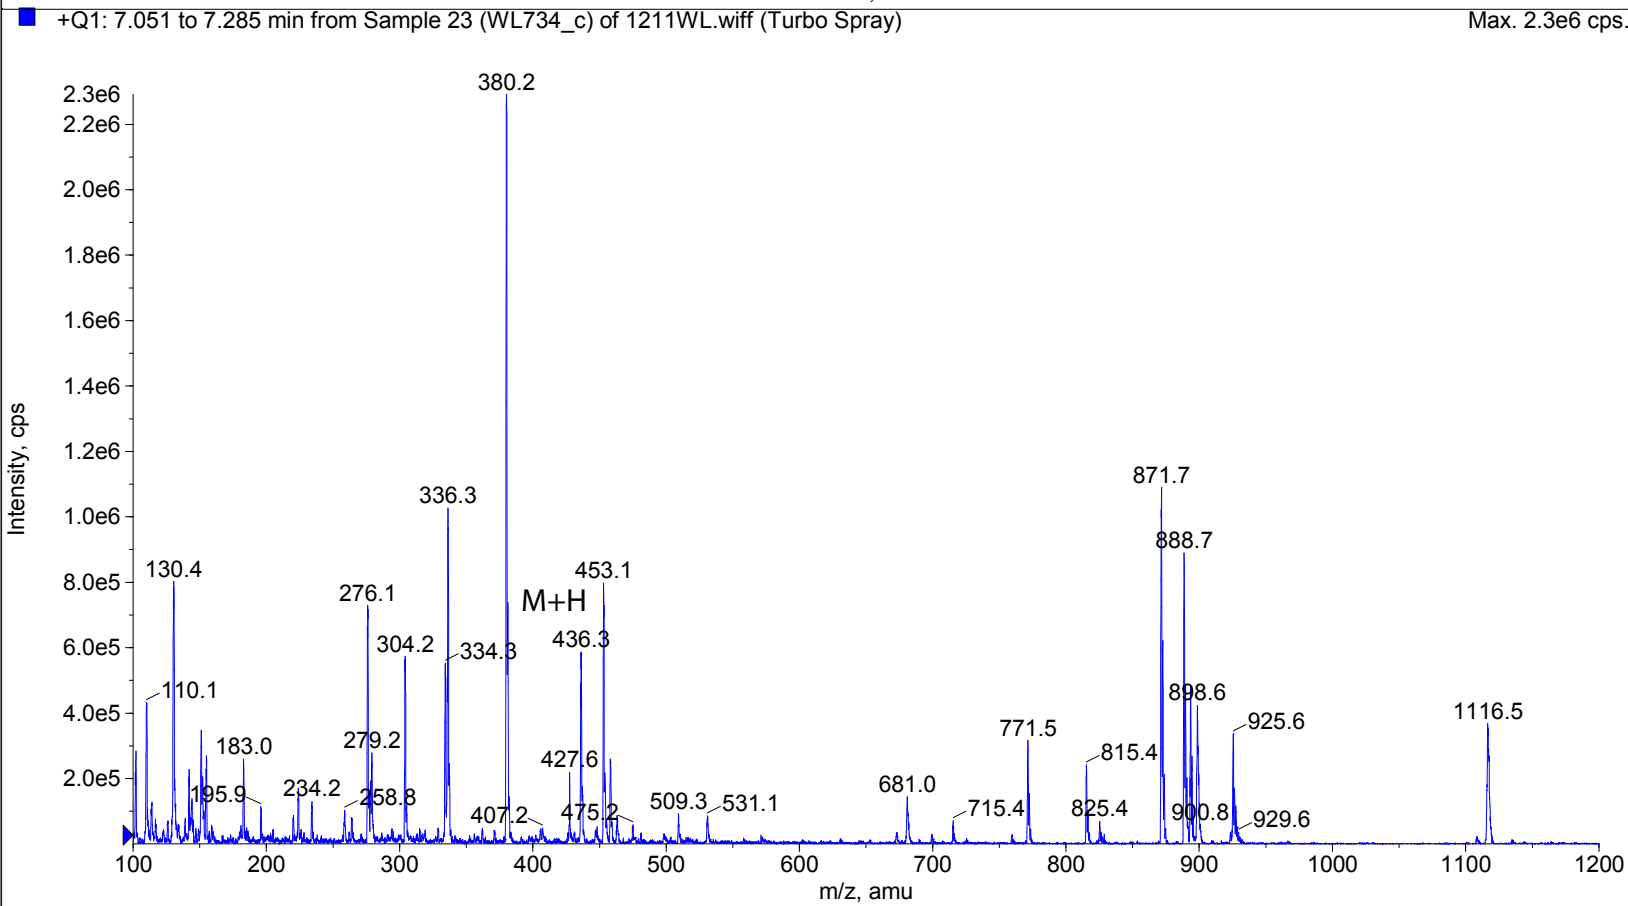

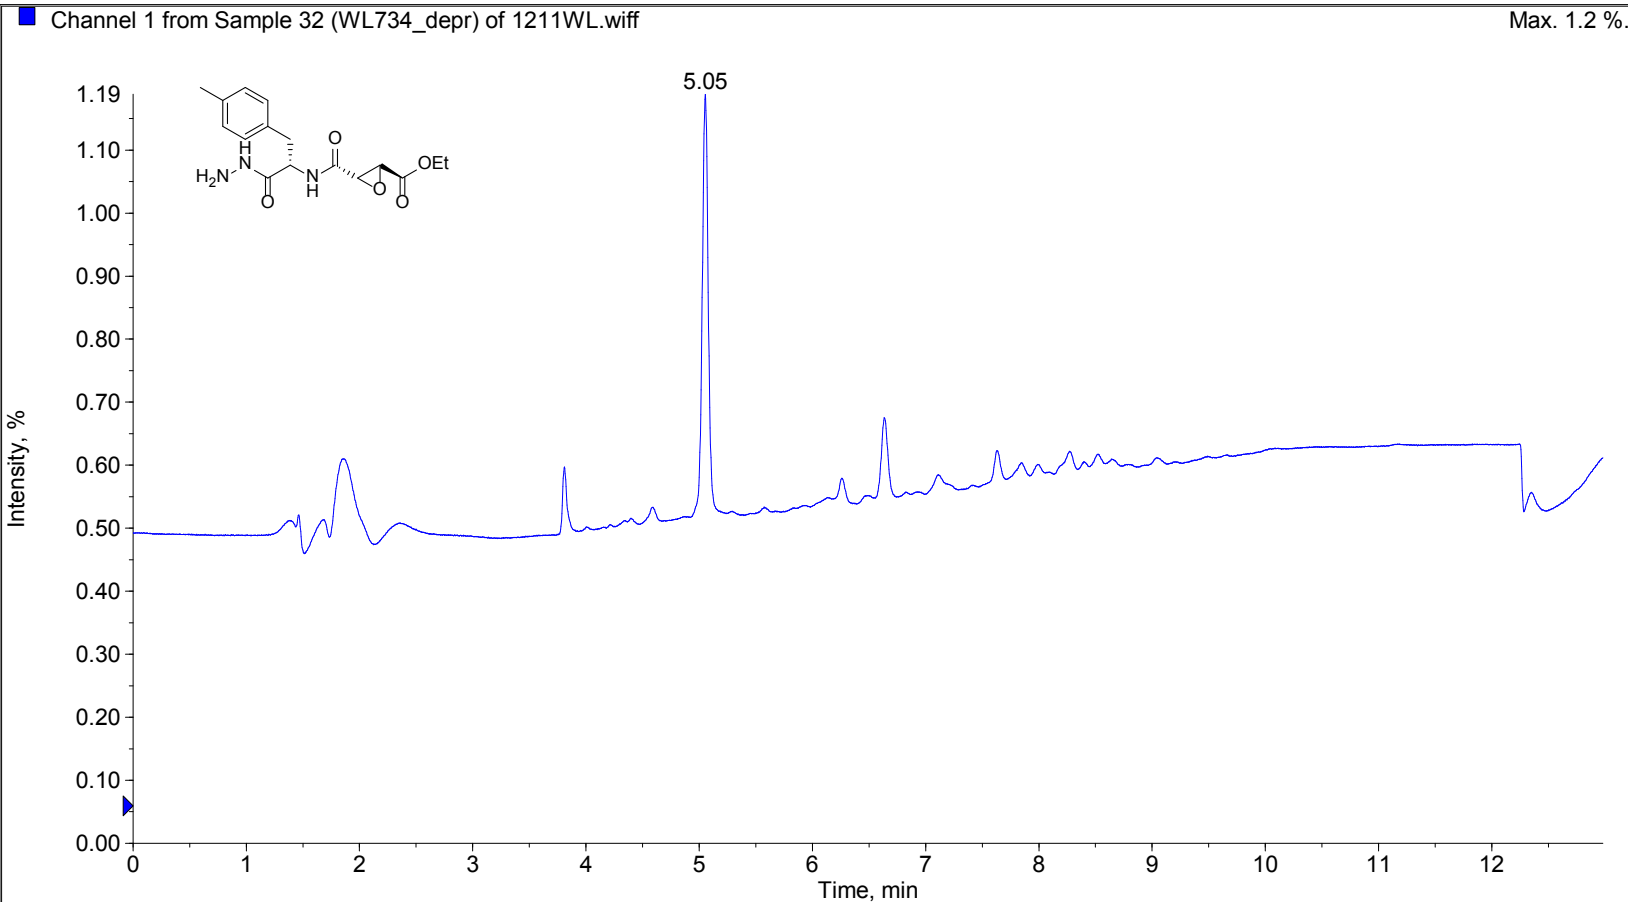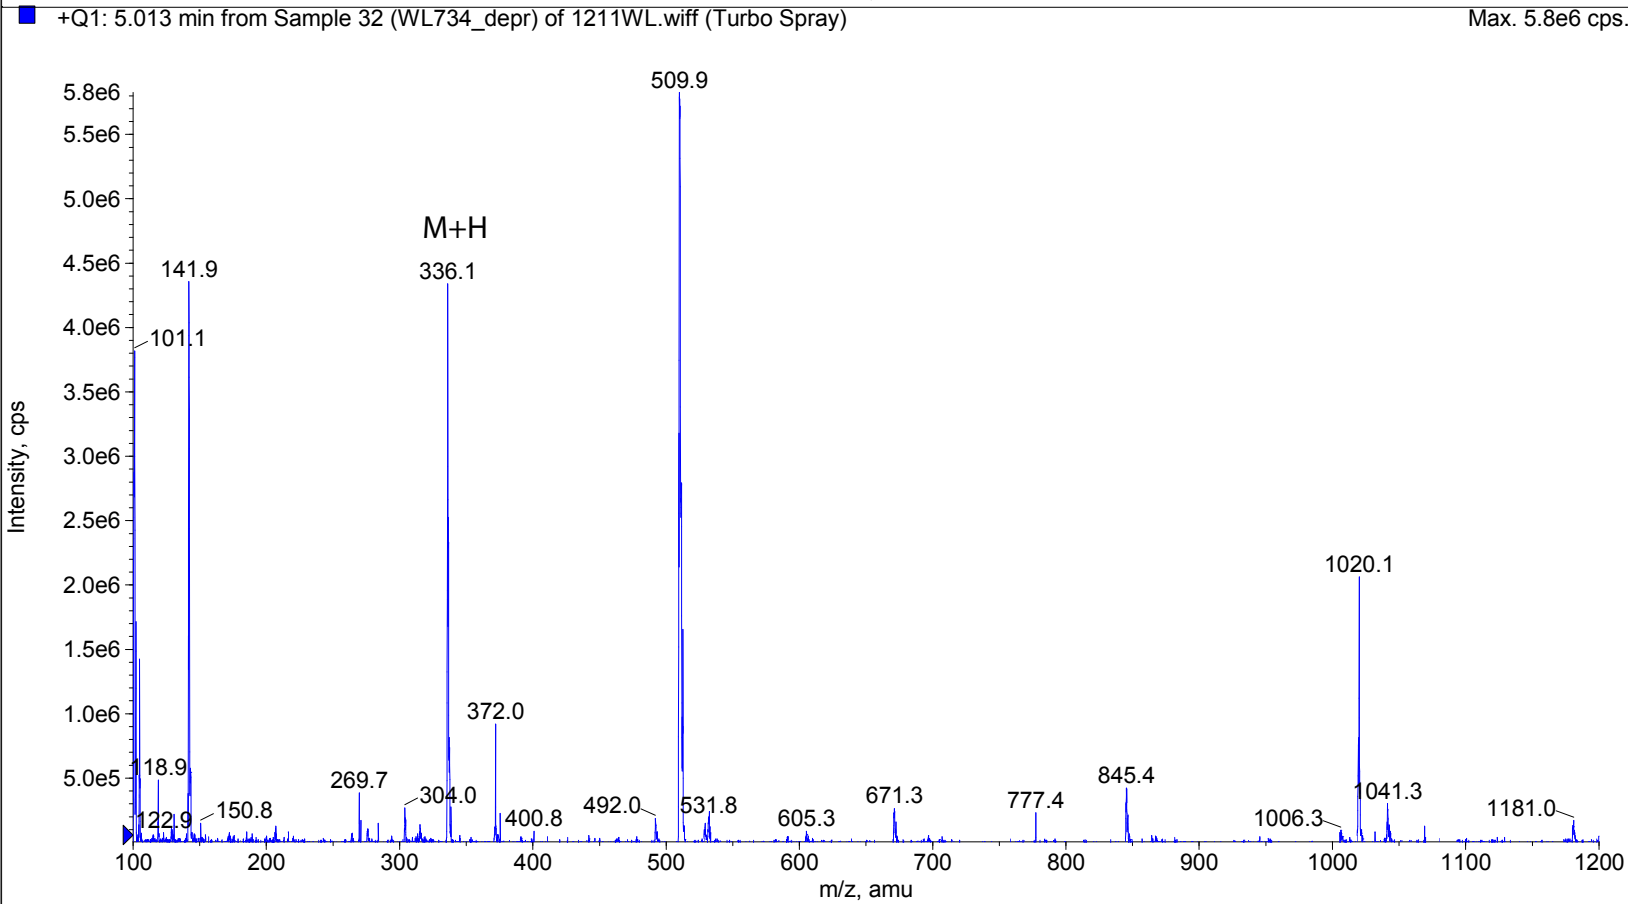

WI 11224-1

SI

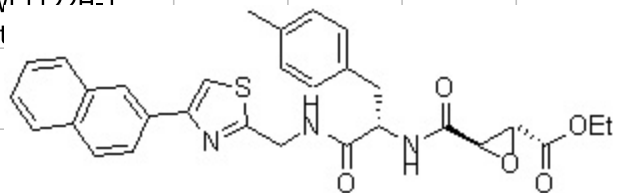

R7P

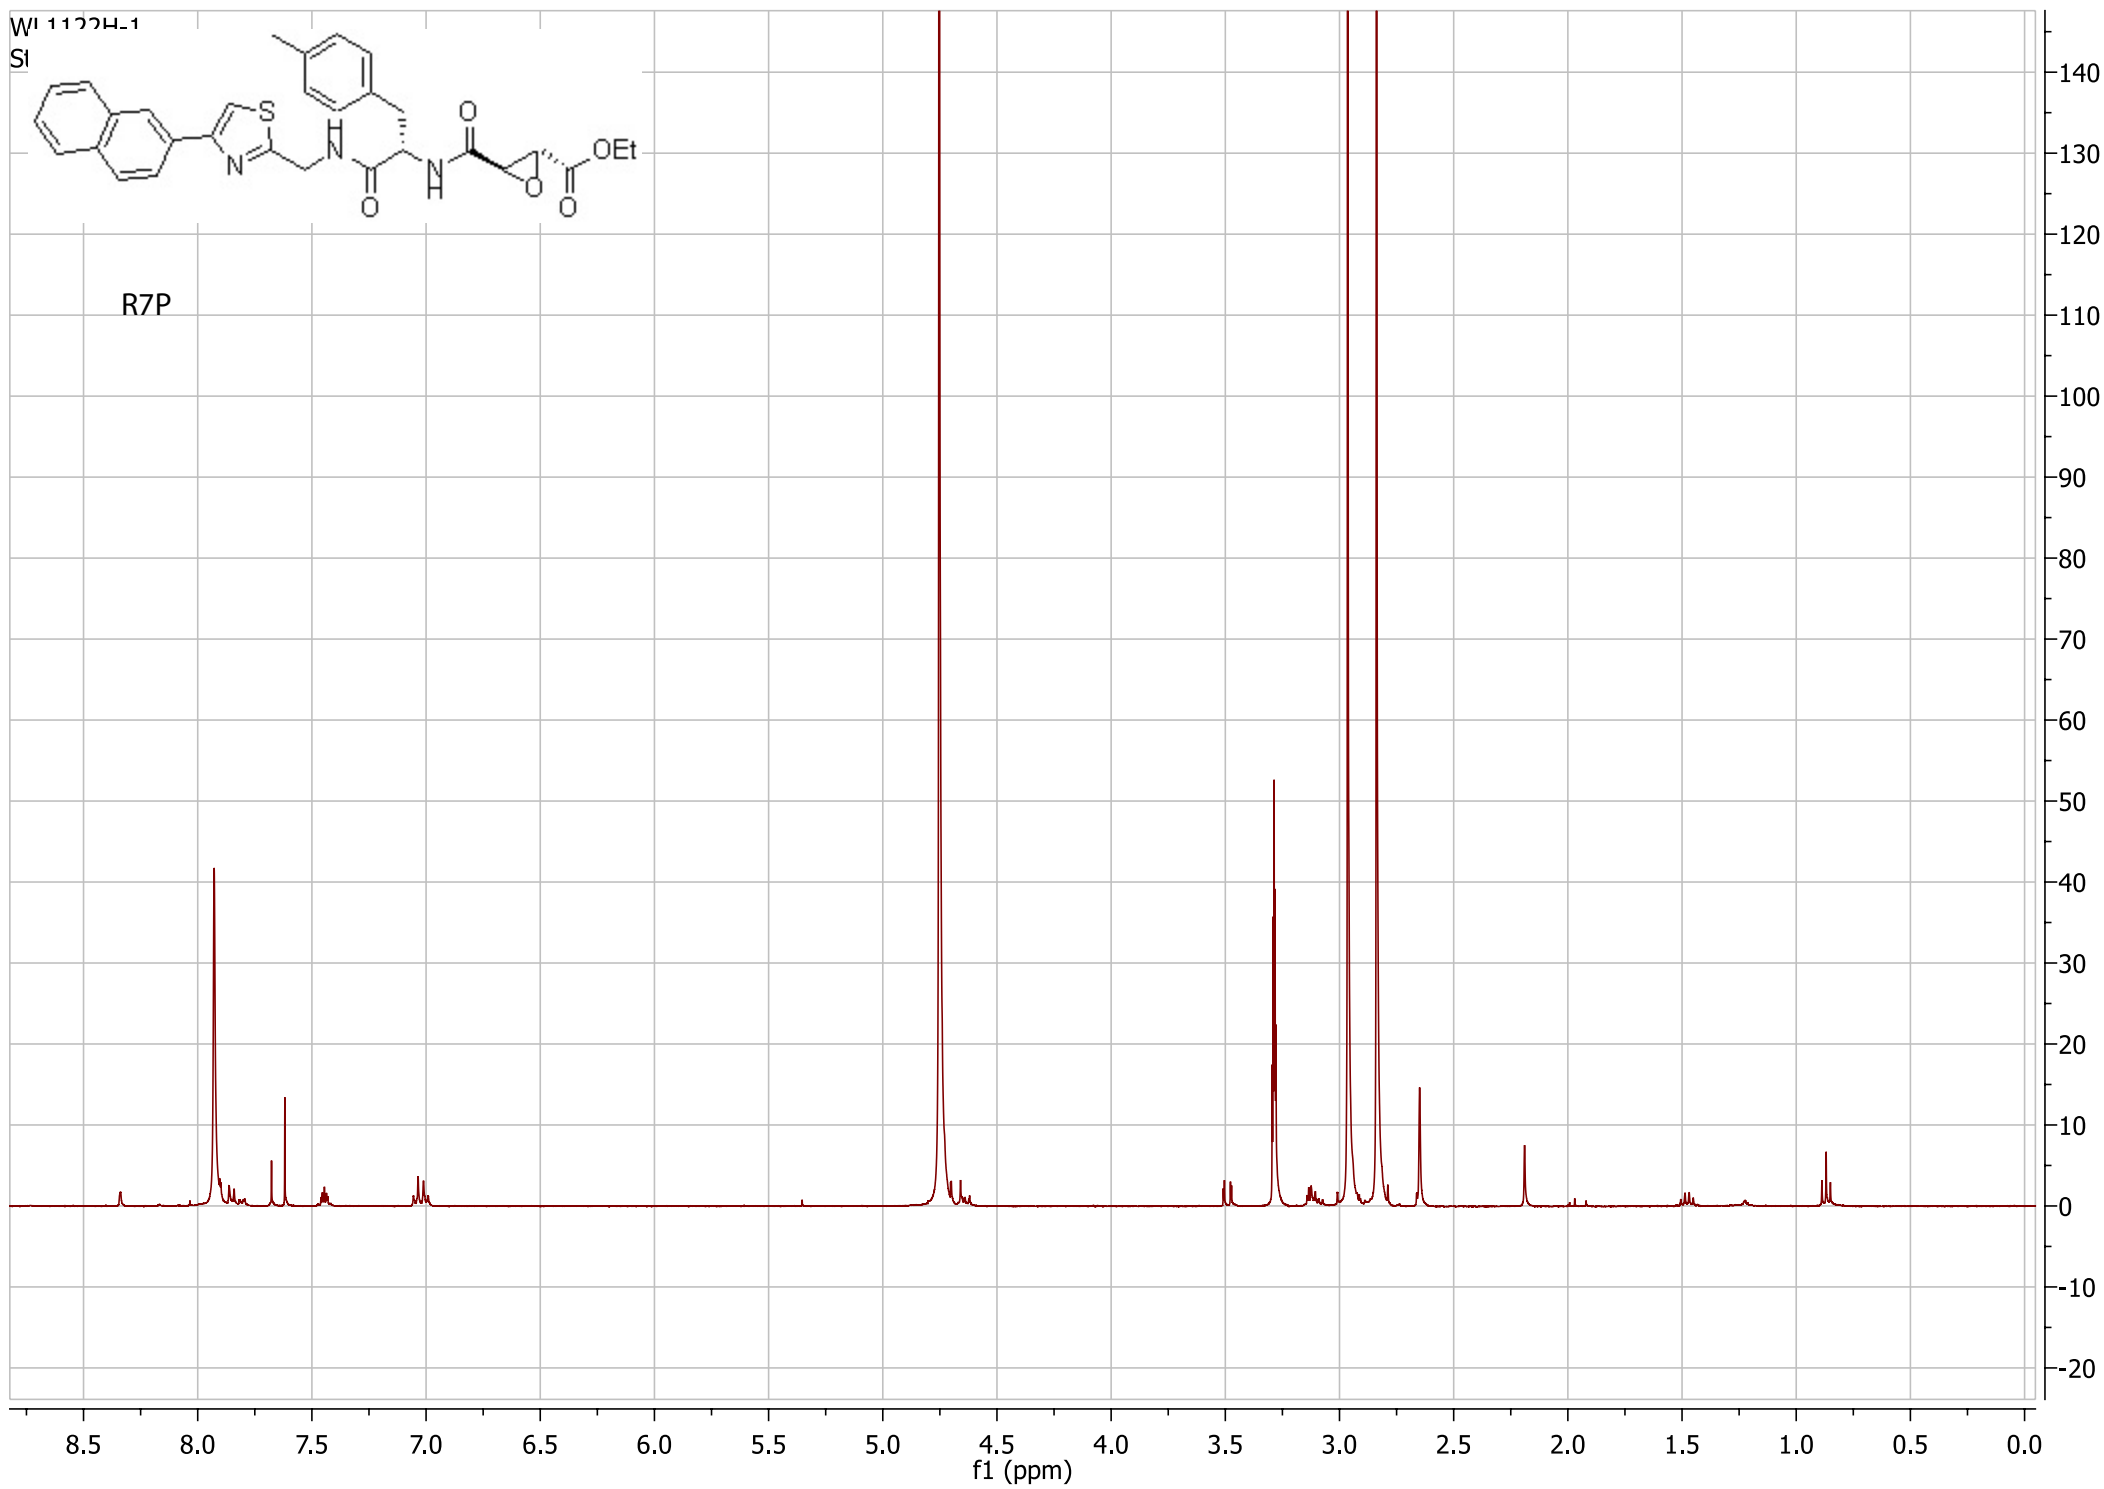

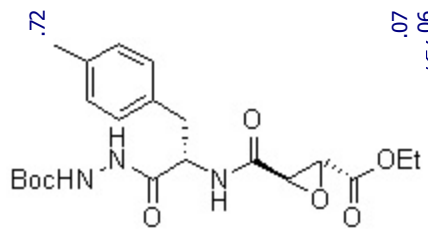

7.07  
7.06  
7.04  
6.92  
6.91

4.77  
4.76

4.24  
4.23  
4.22  
4.22  
4.20  
4.20  
4.19  
4.18

3.59  
3.53  
3.17  
3.15  
3.13  
3.12

2.97  
2.95  
2.93  
2.91

2.28

1.43  
1.28  
1.26  
1.25

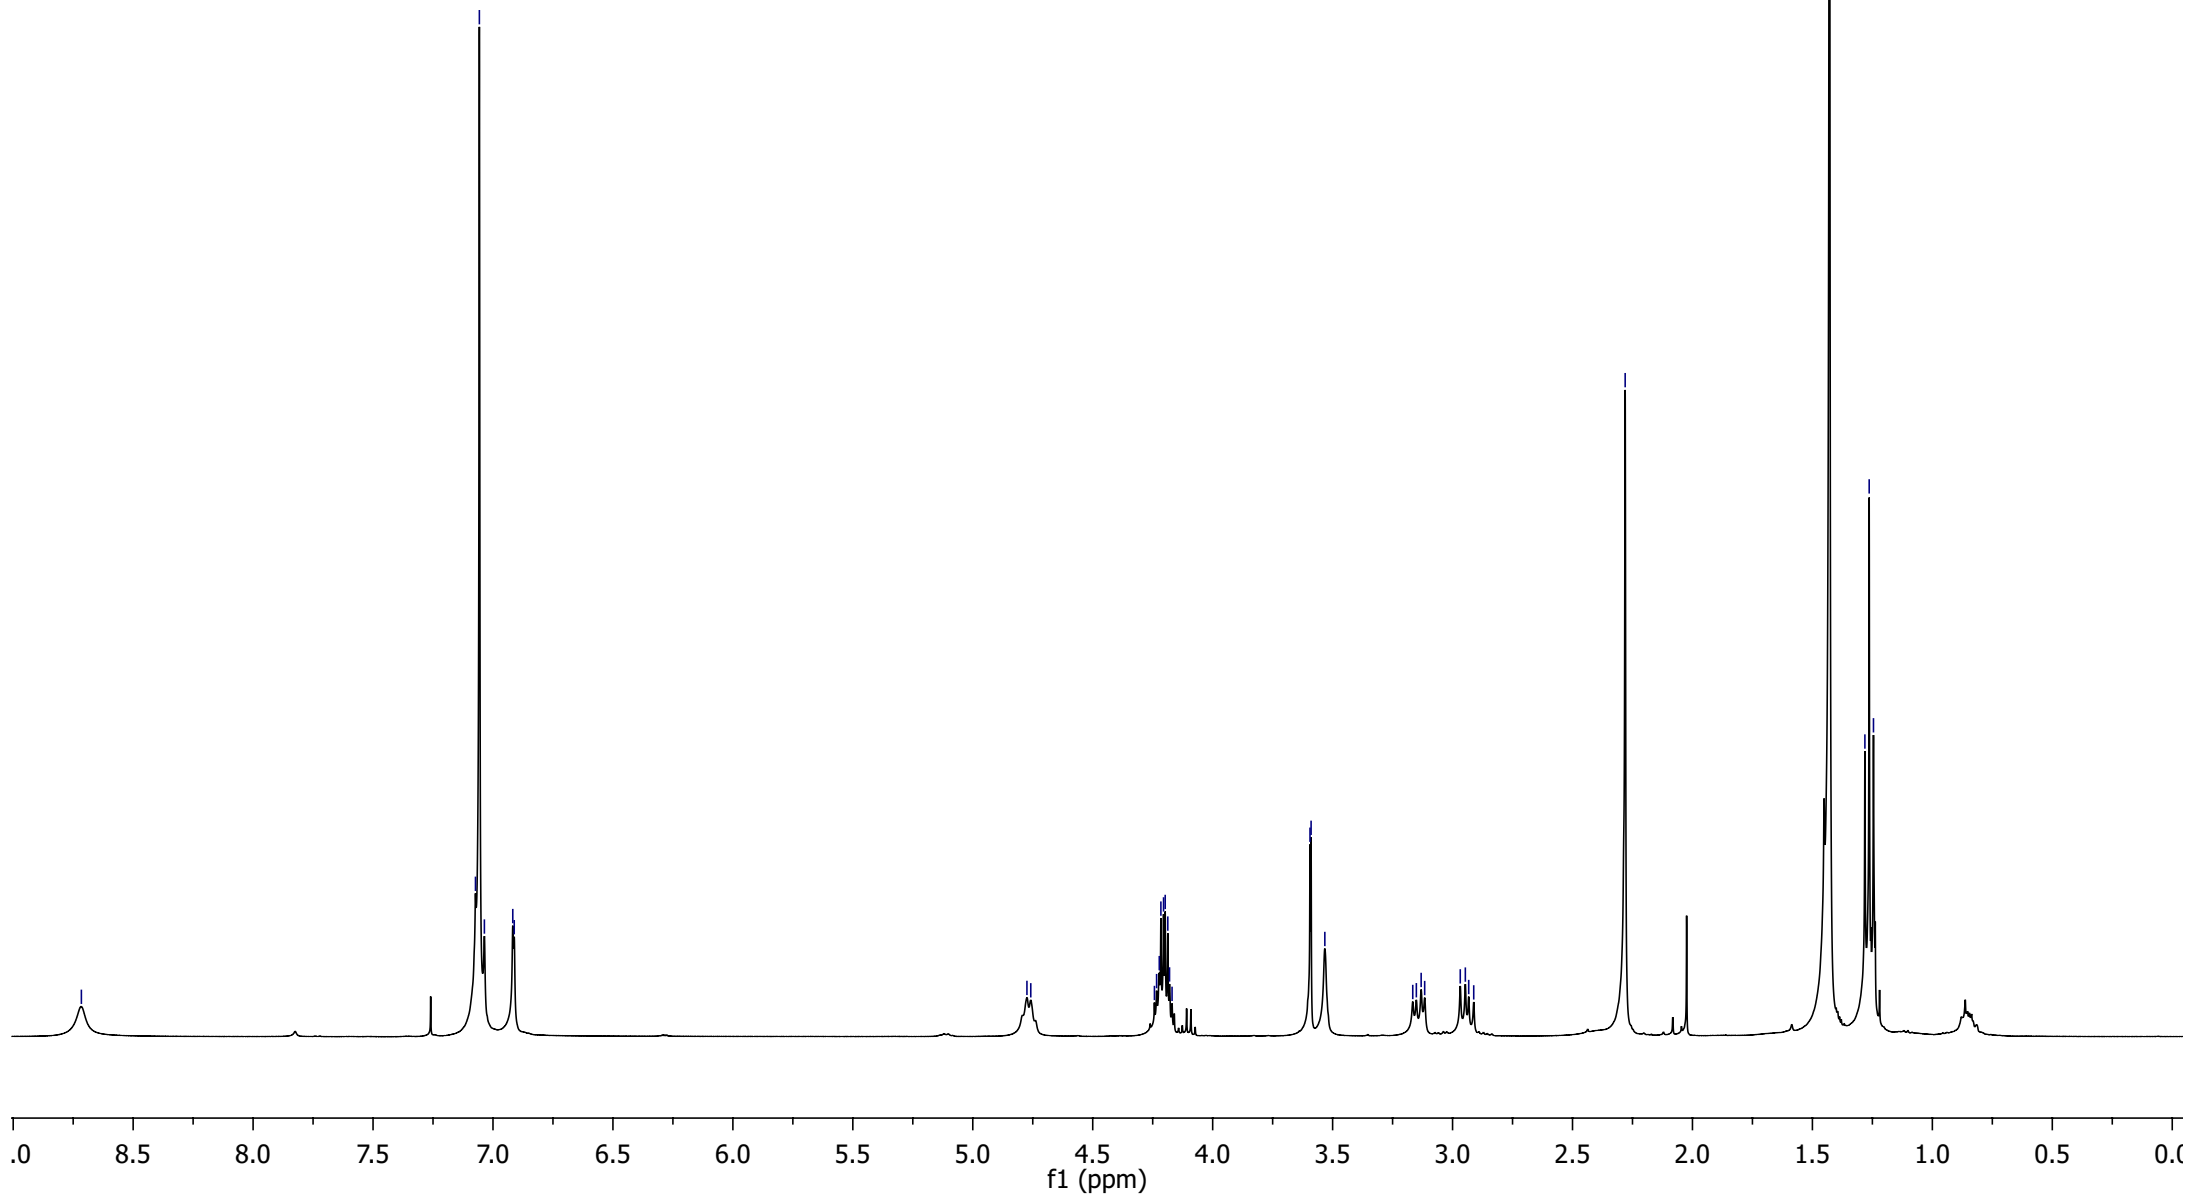

WL851C  
Attached proton test experiment

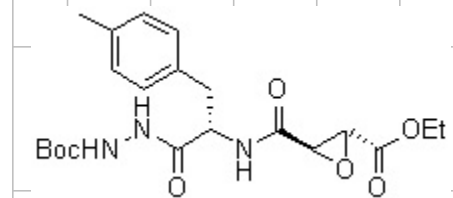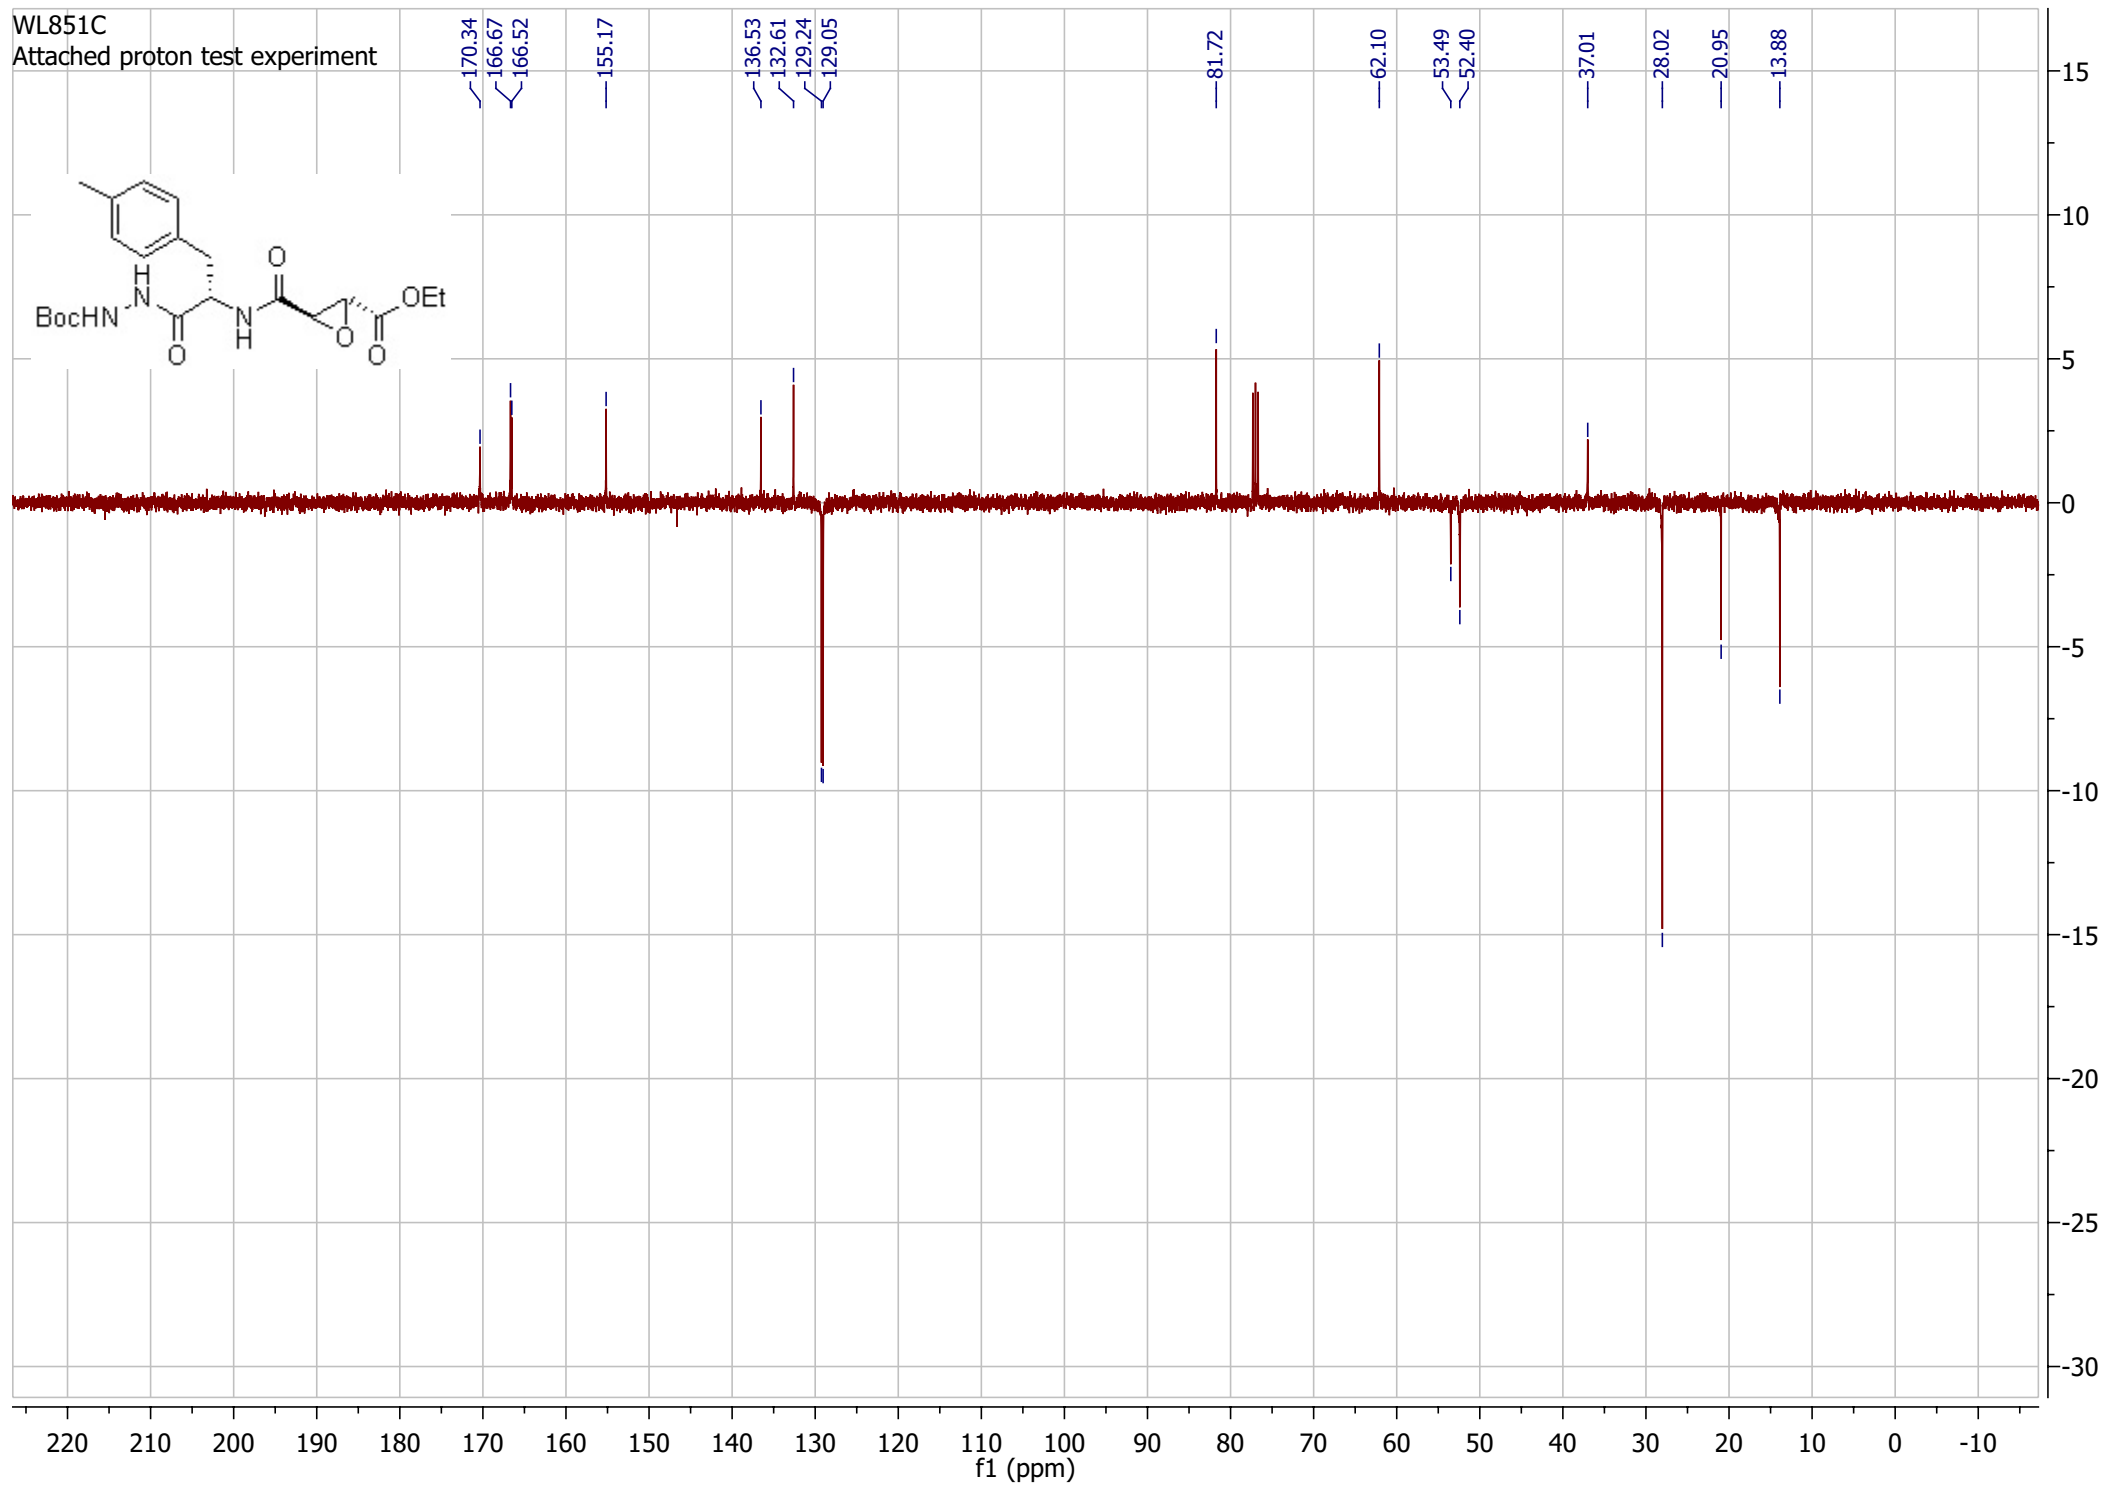

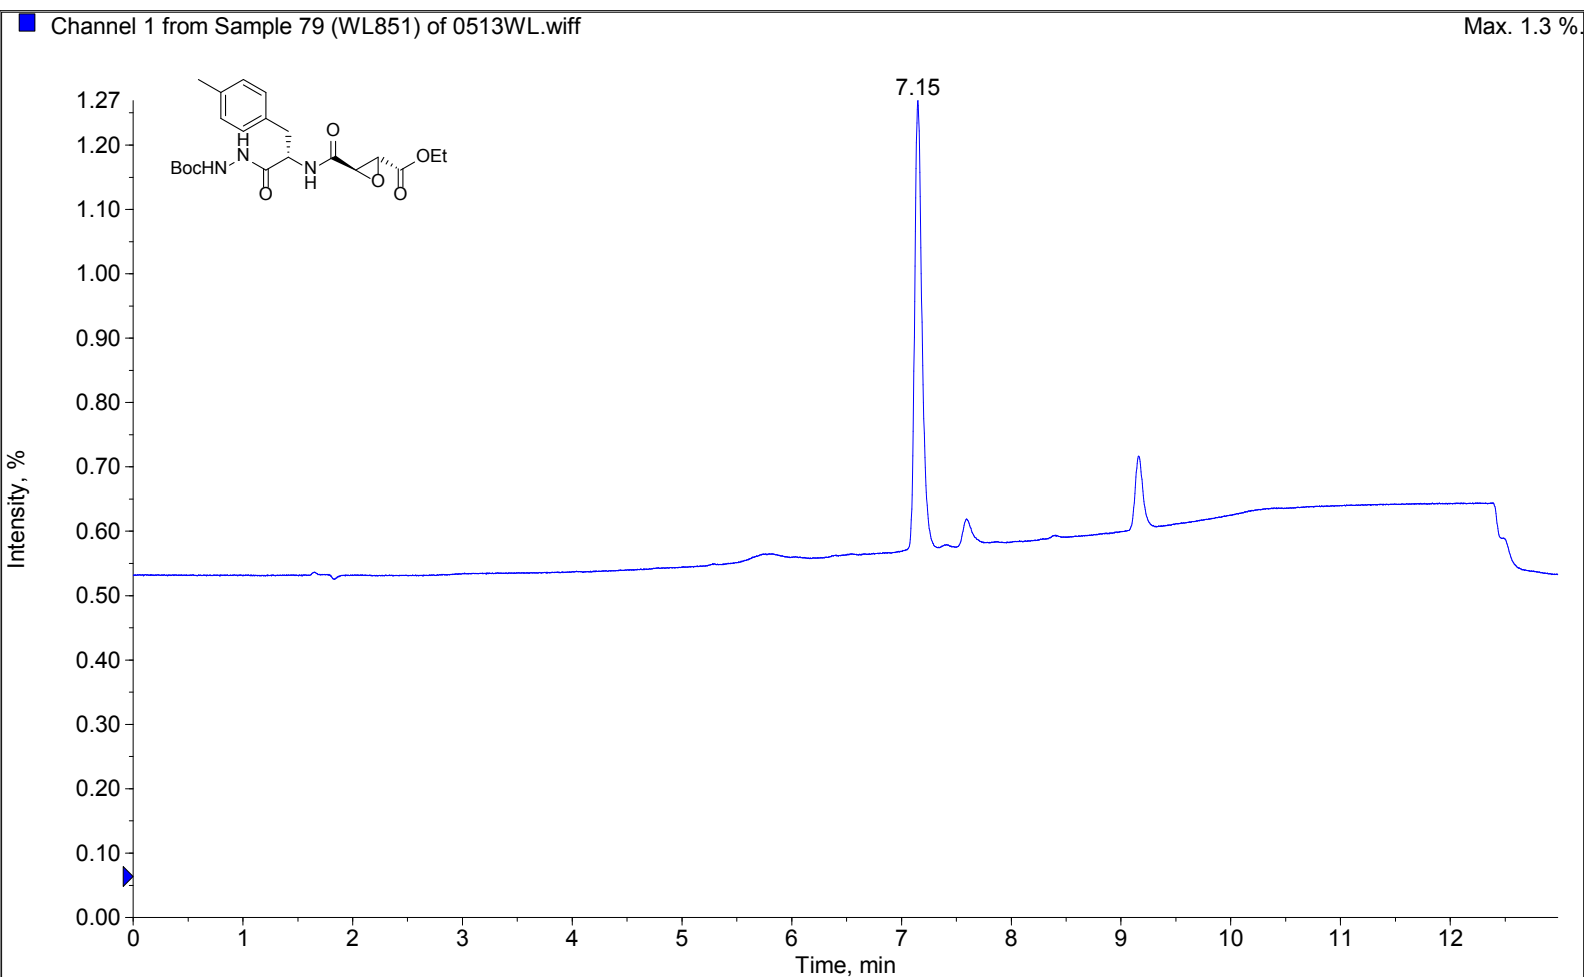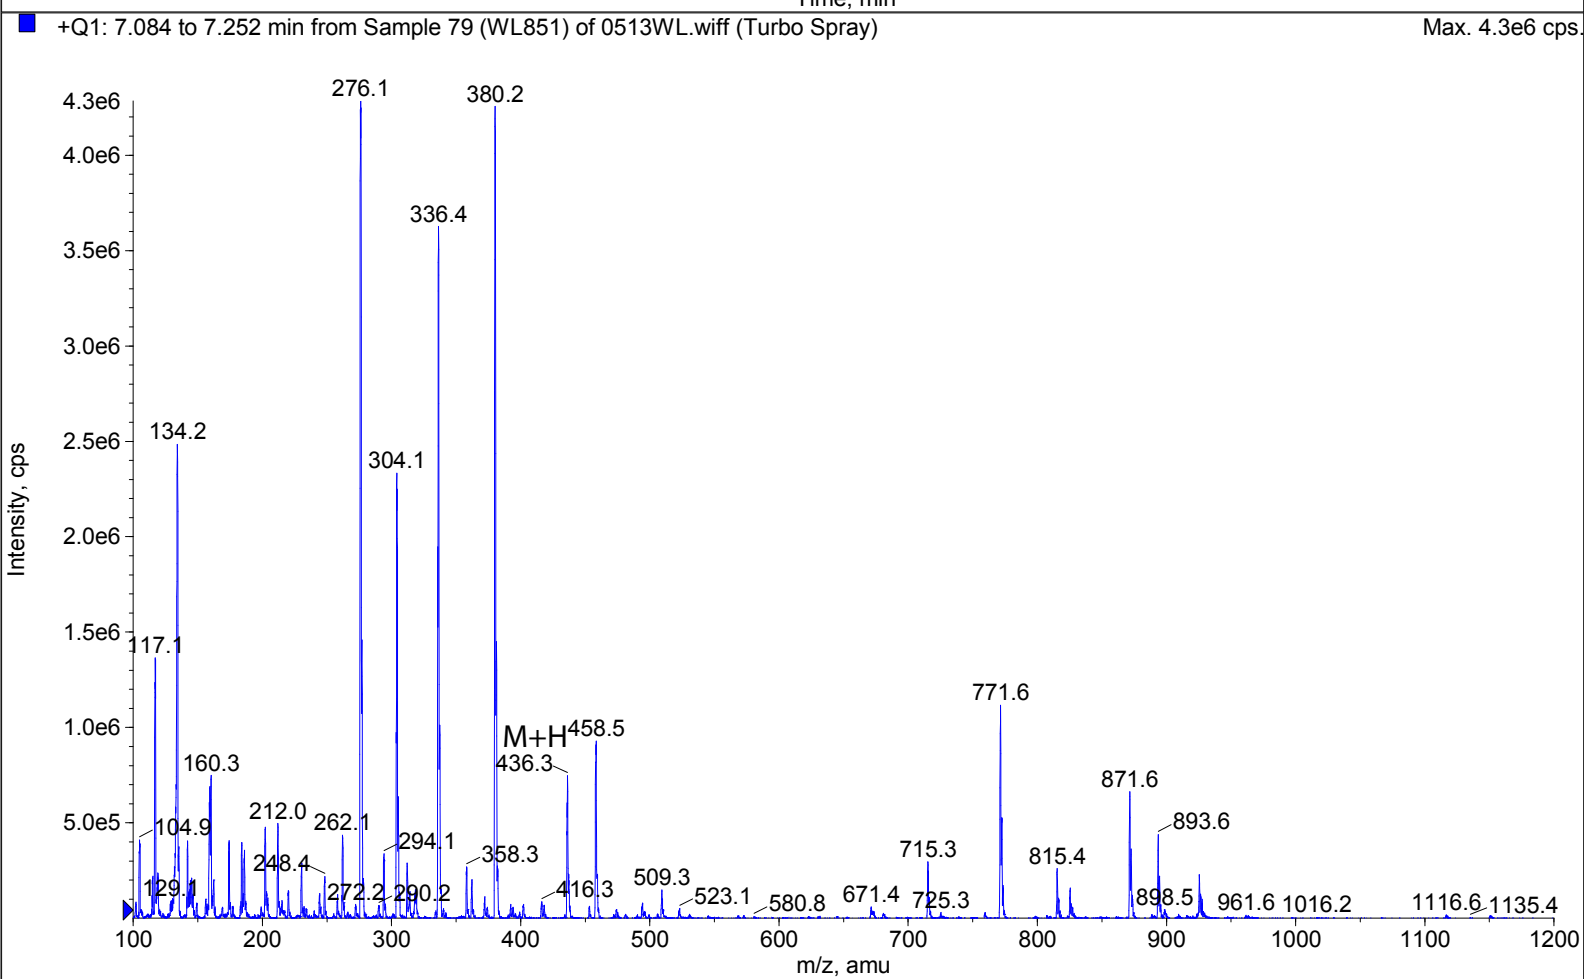

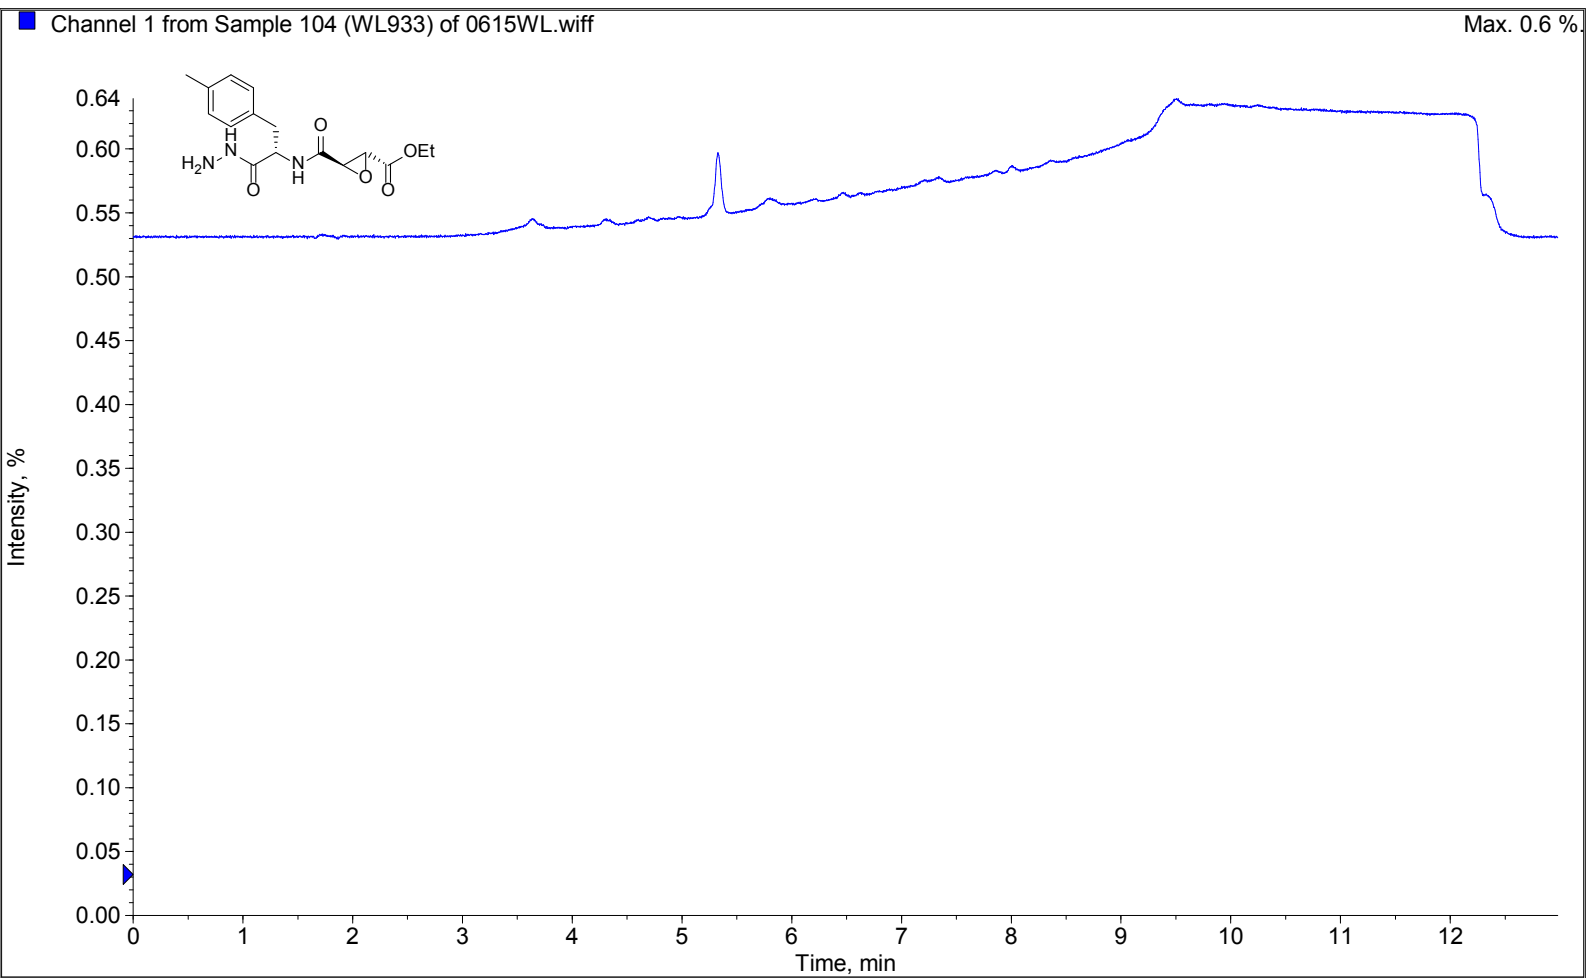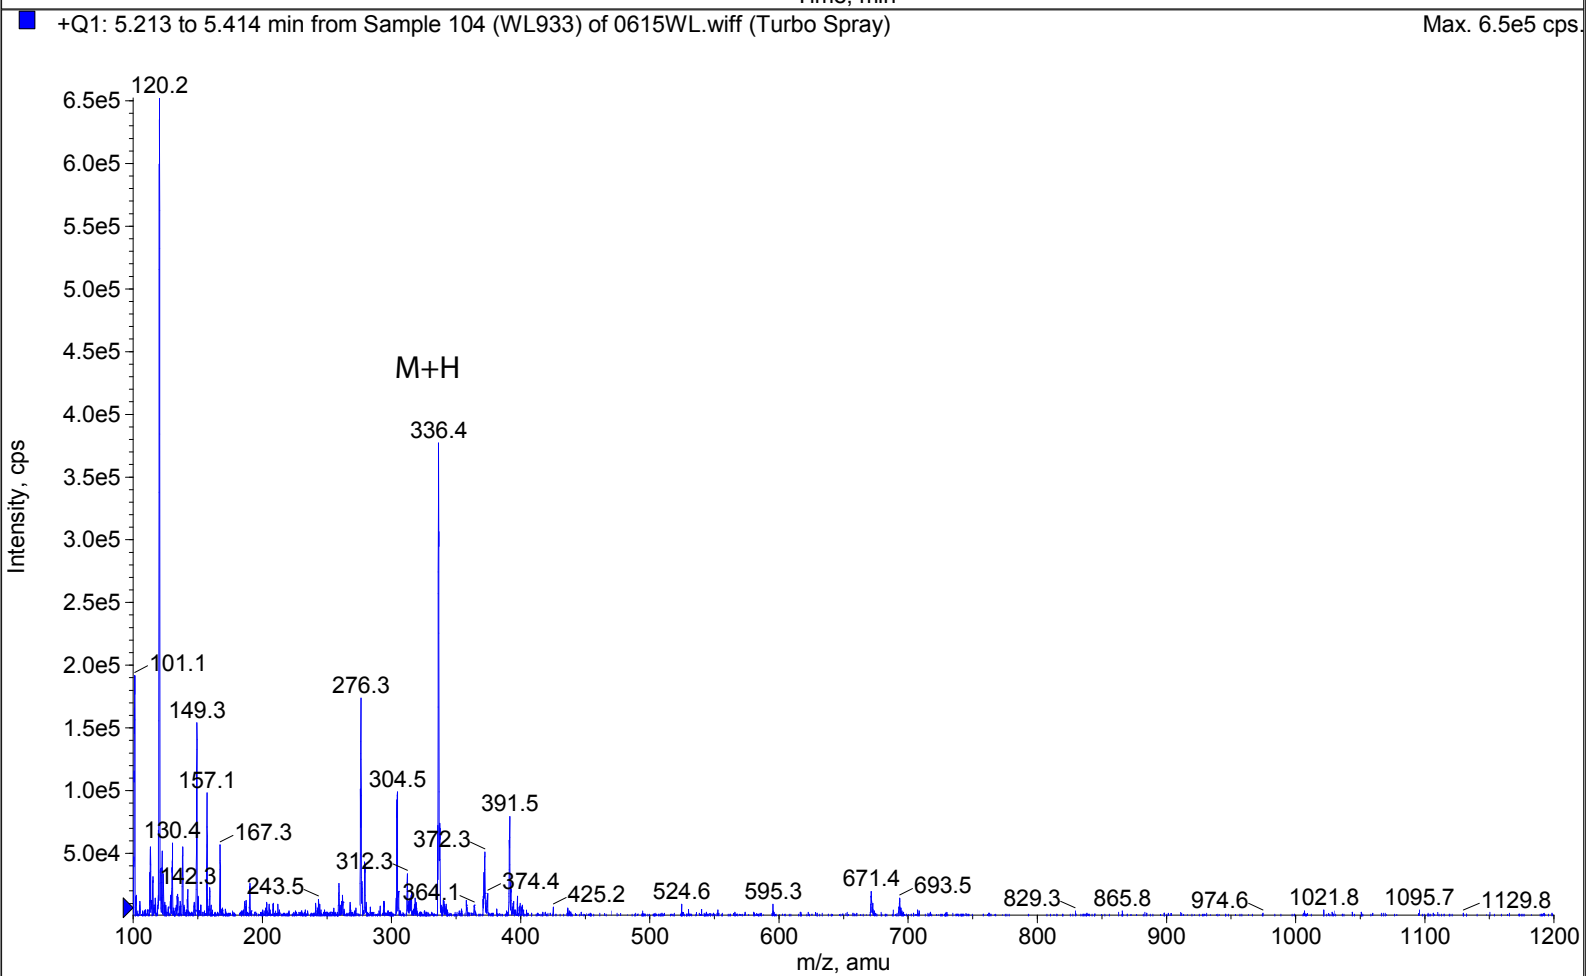

7.22  
7.21  
7.10  
7.08  
7.04  
7.02  
6.87  
6.87  
6.85  
6.85  
6.74  
6.72

5.94

4.63  
4.61  
4.27  
4.25  
4.24  
4.23  
4.22  
4.04  
4.02  
3.98  
3.97  
3.88  
3.67  
3.67  
3.16  
3.14  
3.13  
3.12  
2.98  
2.96  
2.94  
2.91  
2.88  
2.75  
2.75

1.68

1.32  
1.30  
1.28  
1.25

S1Et

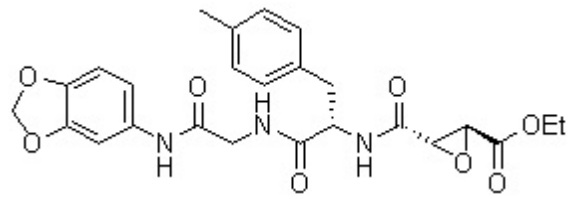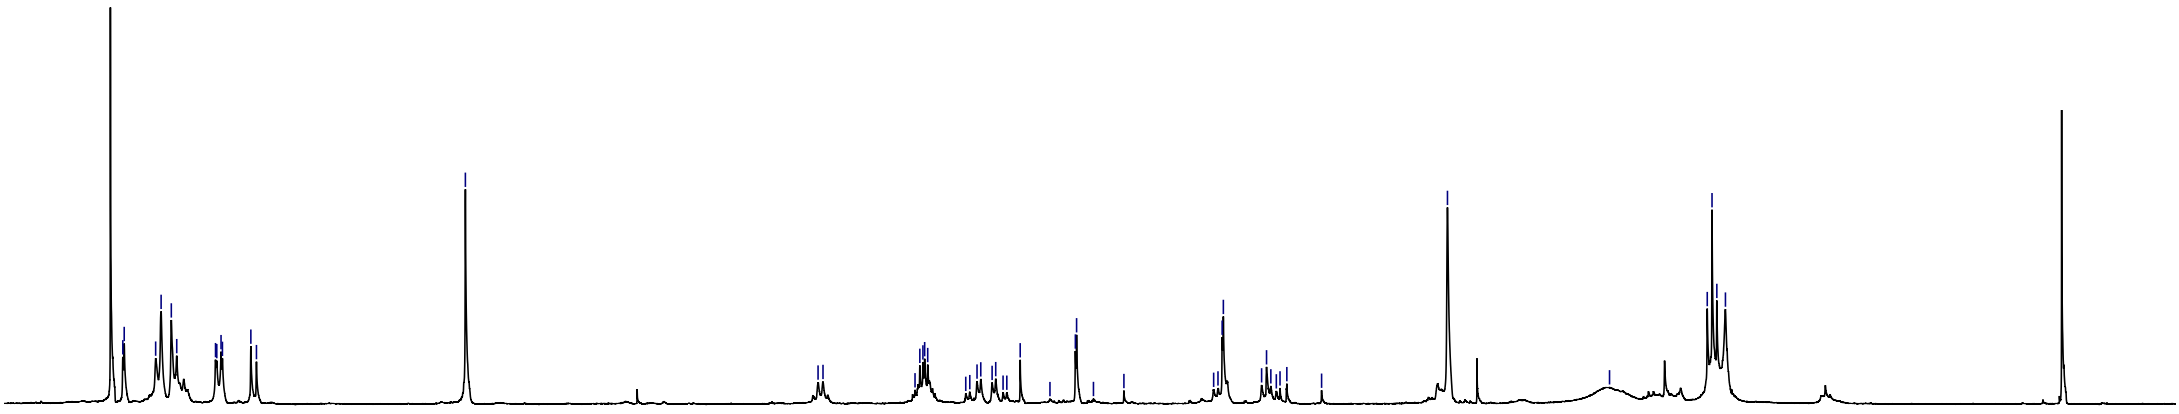

7.5 7.0 6.5 6.0 5.5 5.0 4.5 4.0 3.5 3.0 2.5 2.0 1.5 1.0 0.5 0.0

f1 (ppm)



Channel 1 from Sample 41 (WL740) of 1211WL.wiff

Max. 1.1 %

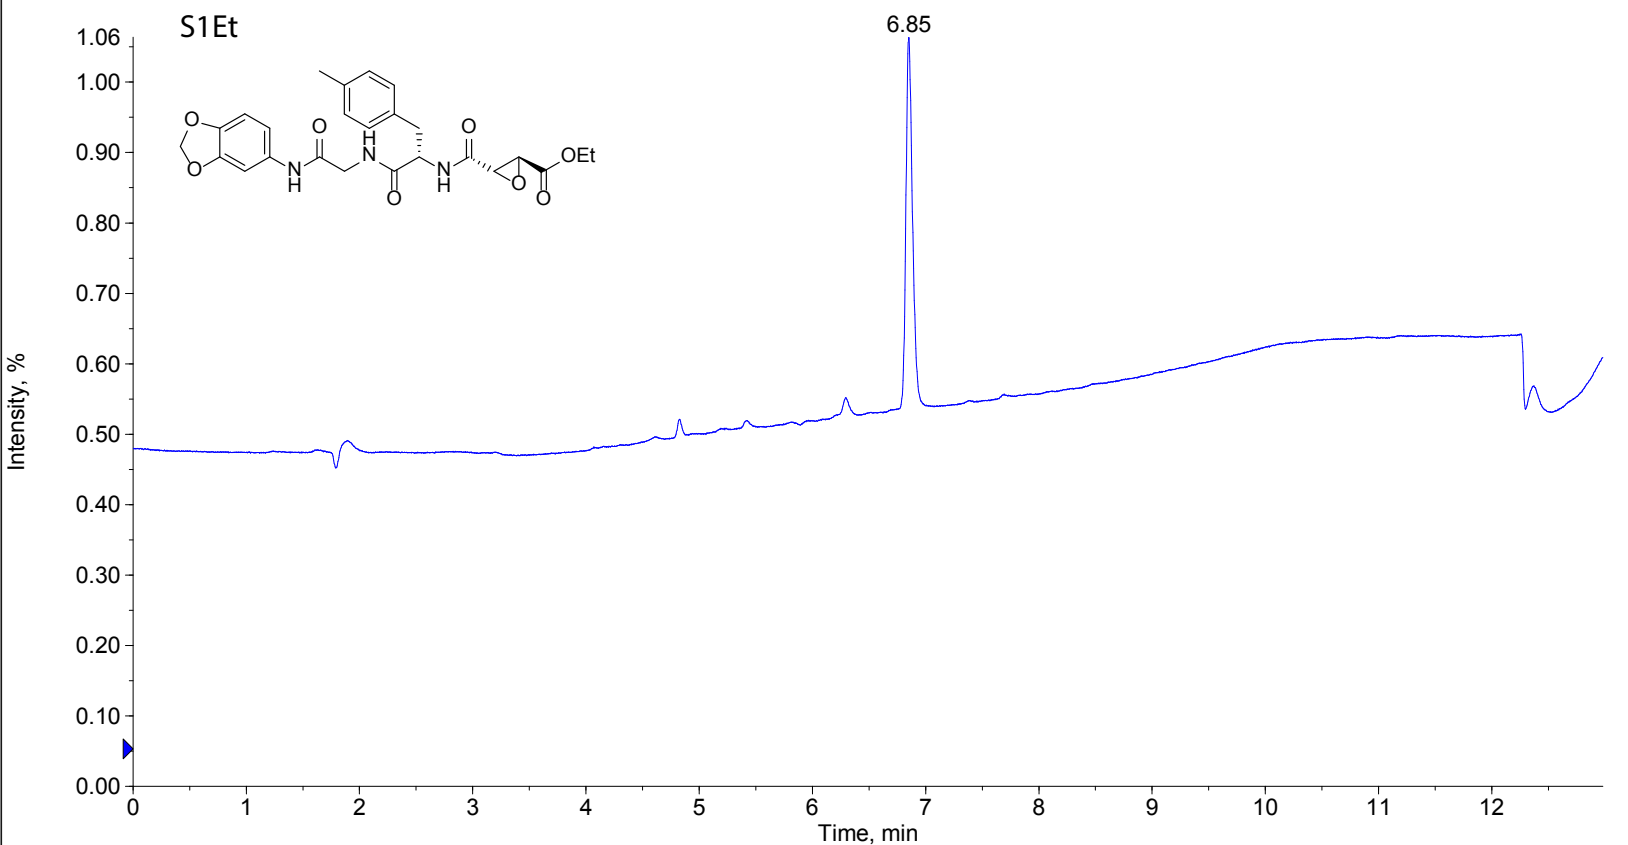

+Q1: 6.851 min from Sample 41 (WL740) of 1211WL.wiff (Turbo Spray)

Max. 2.6e6 cps

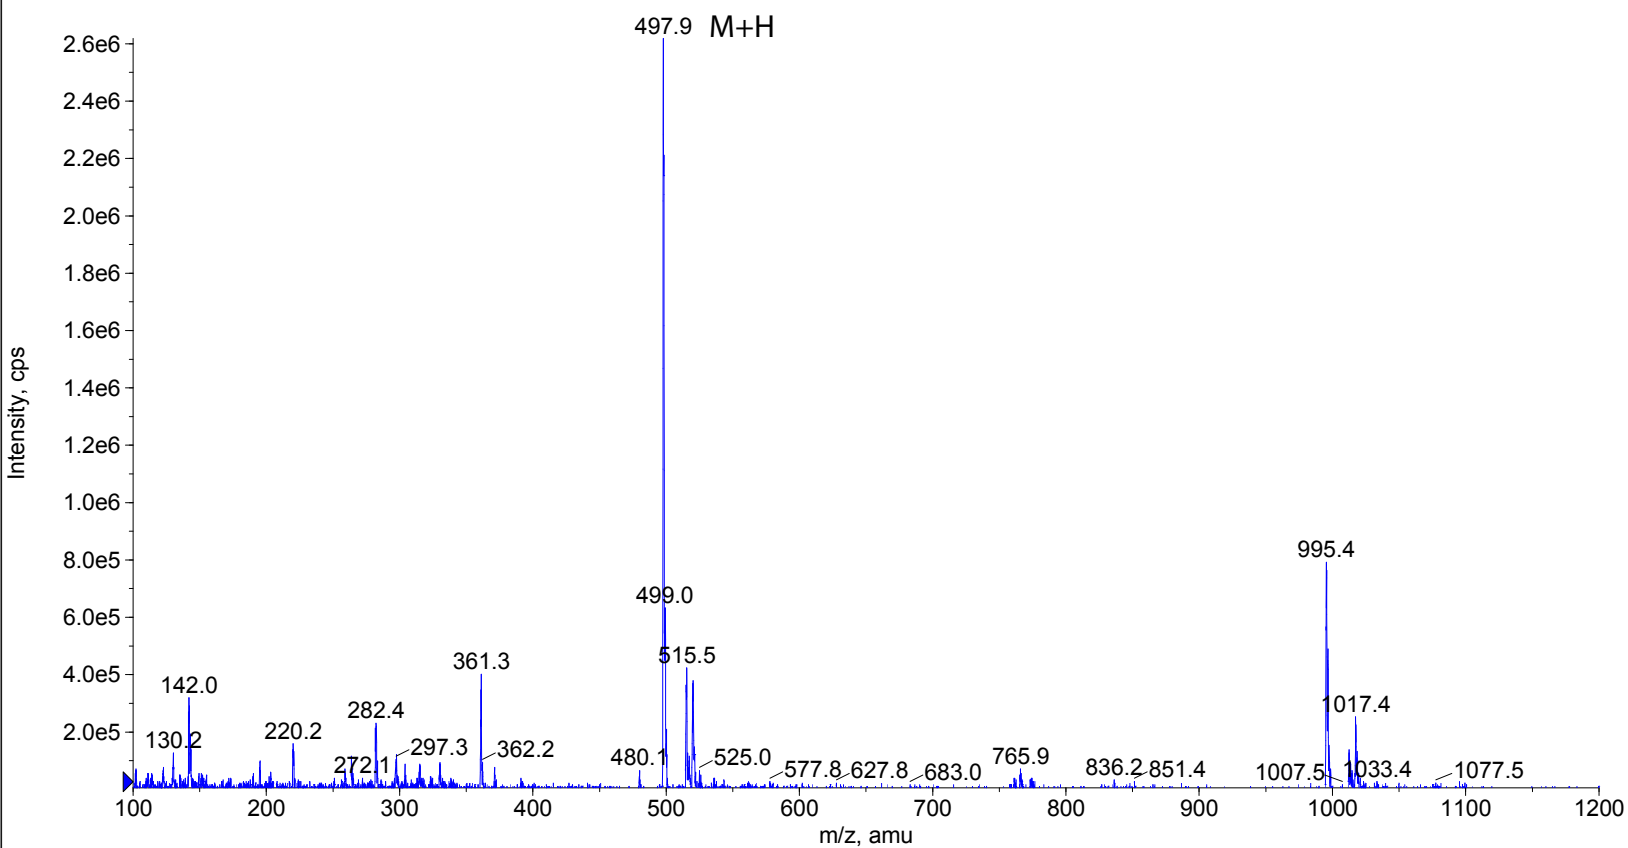

S2Et

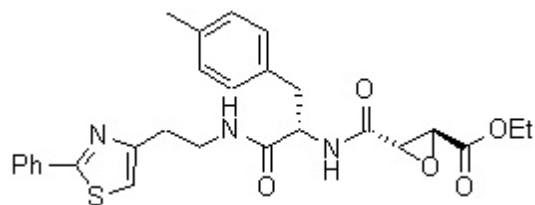

7.90  
7.90  
7.88  
7.88  
7.46  
7.44  
7.44  
7.43  
7.26  
7.02  
7.00  
6.98  
6.87  
6.67  
6.65  
6.57

4.58  
4.56  
4.54  
4.52  
4.25  
4.24  
4.23  
4.22

3.62  
3.61  
3.60  
3.56  
3.56

3.05  
3.05  
3.04  
3.02  
2.96  
2.94  
2.93  
2.91  
2.88  
2.88

1.32  
1.30  
1.29  
1.25

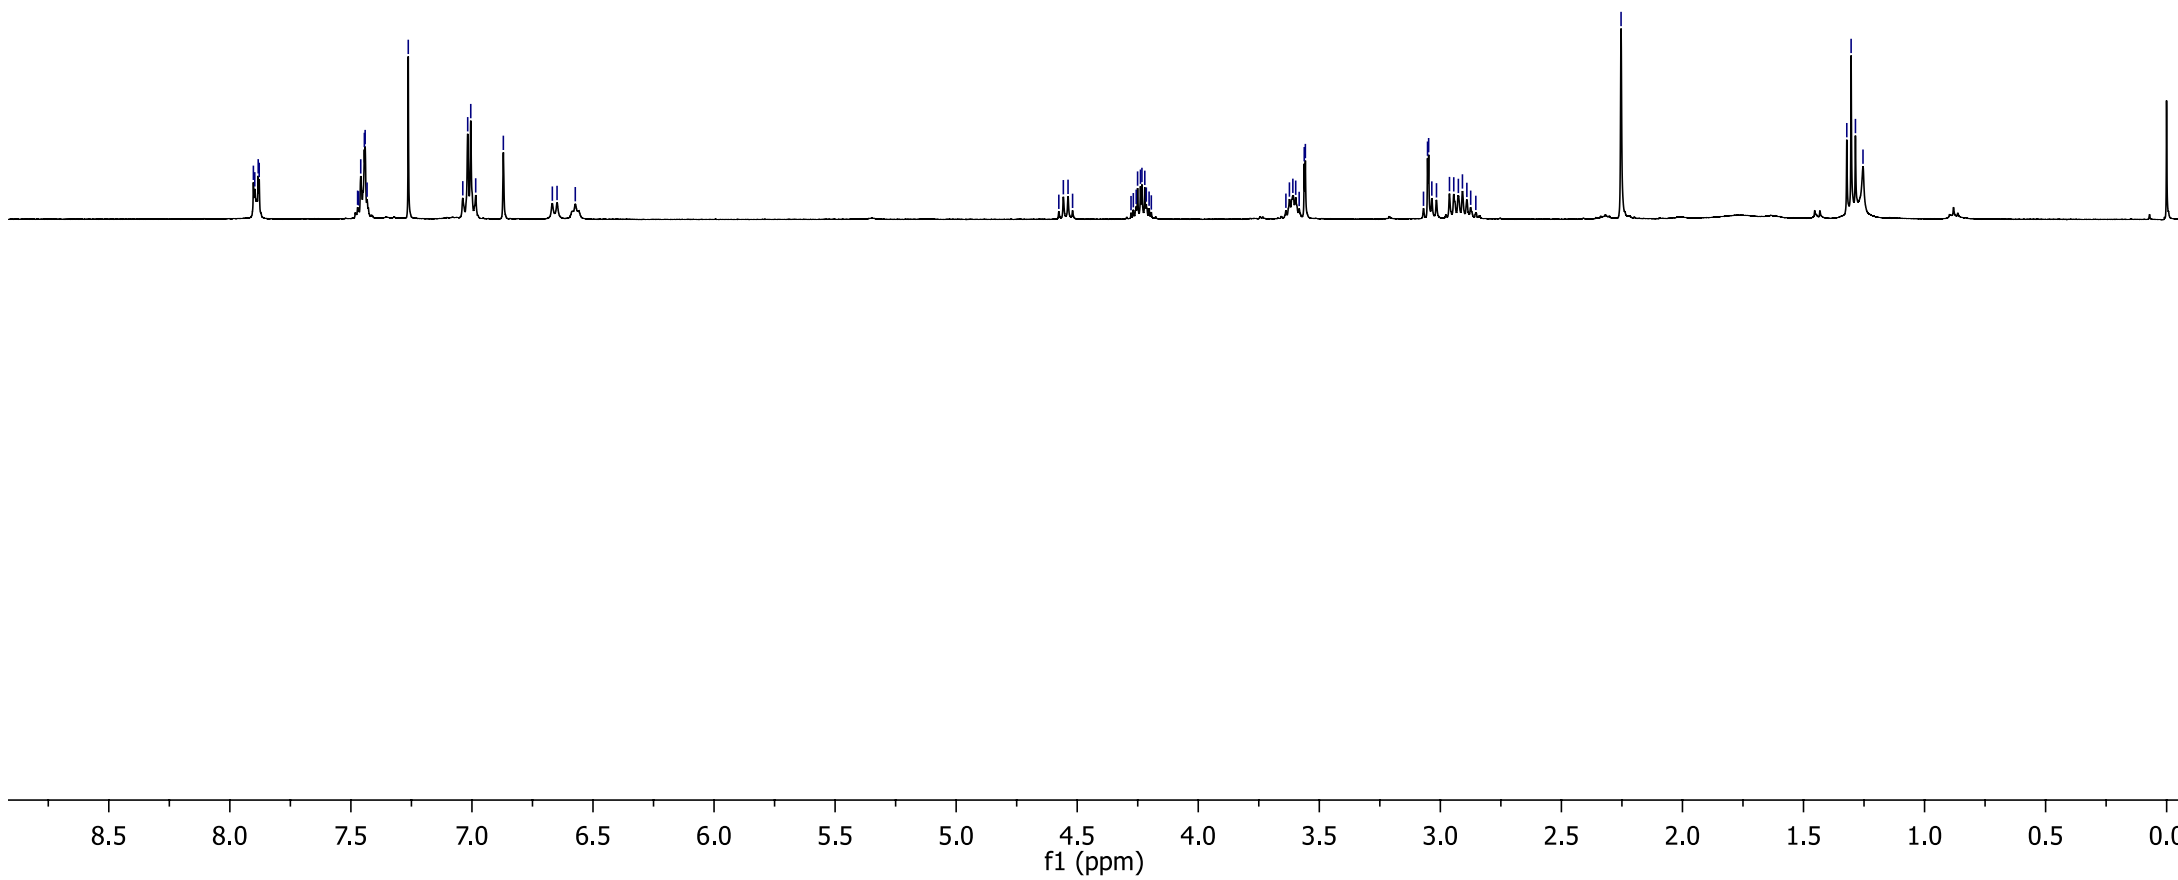

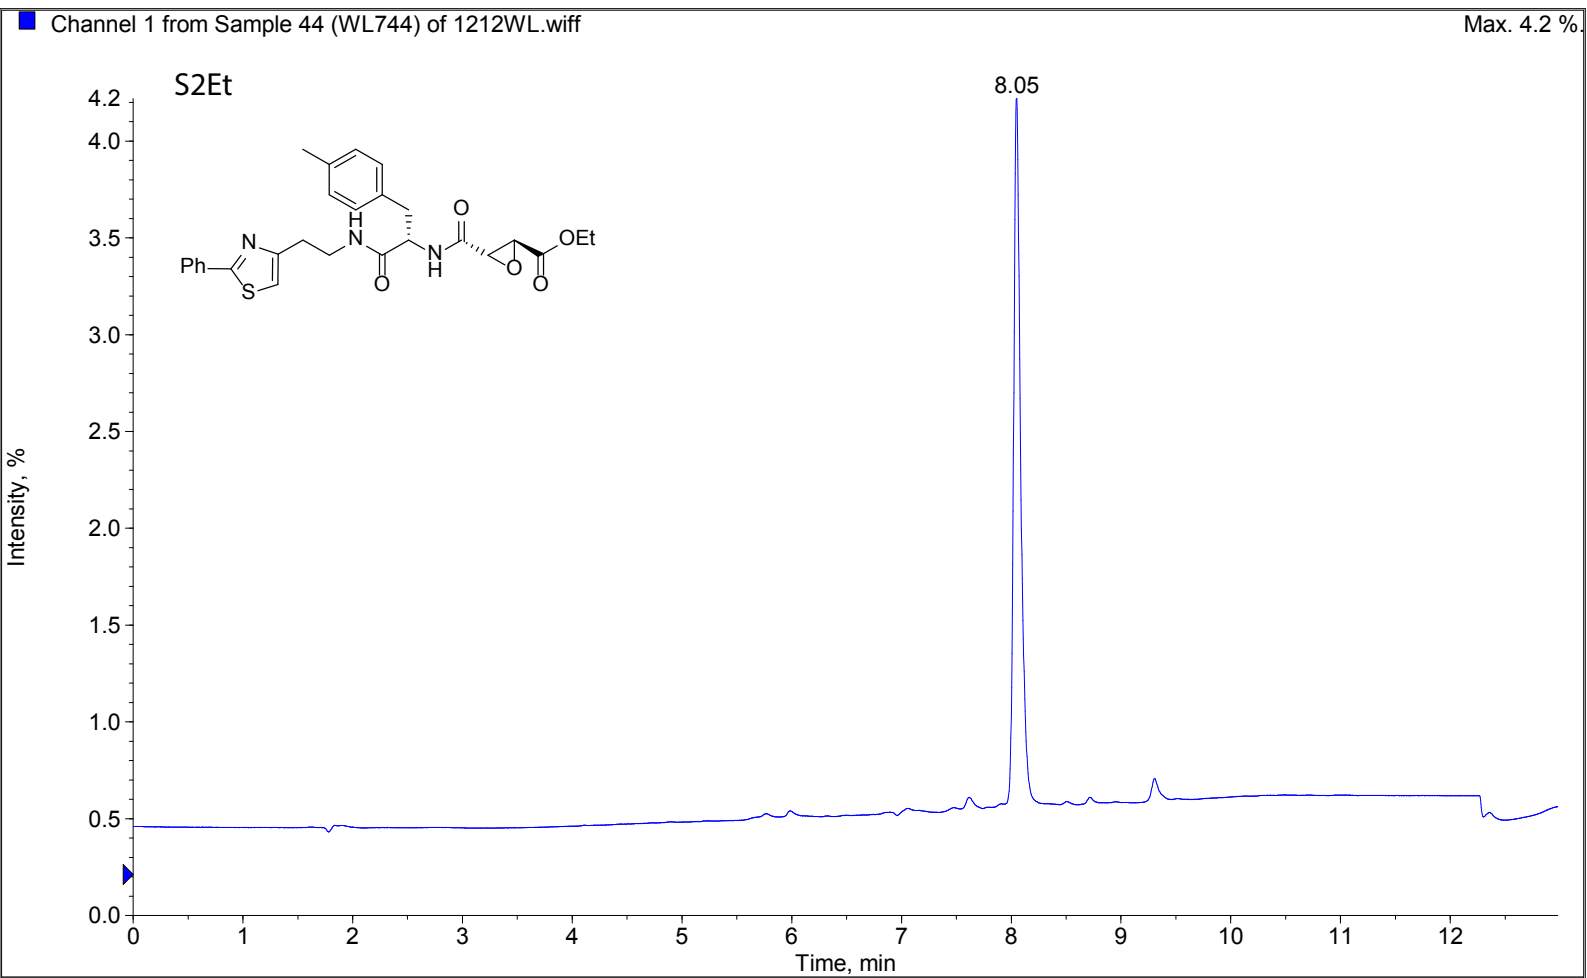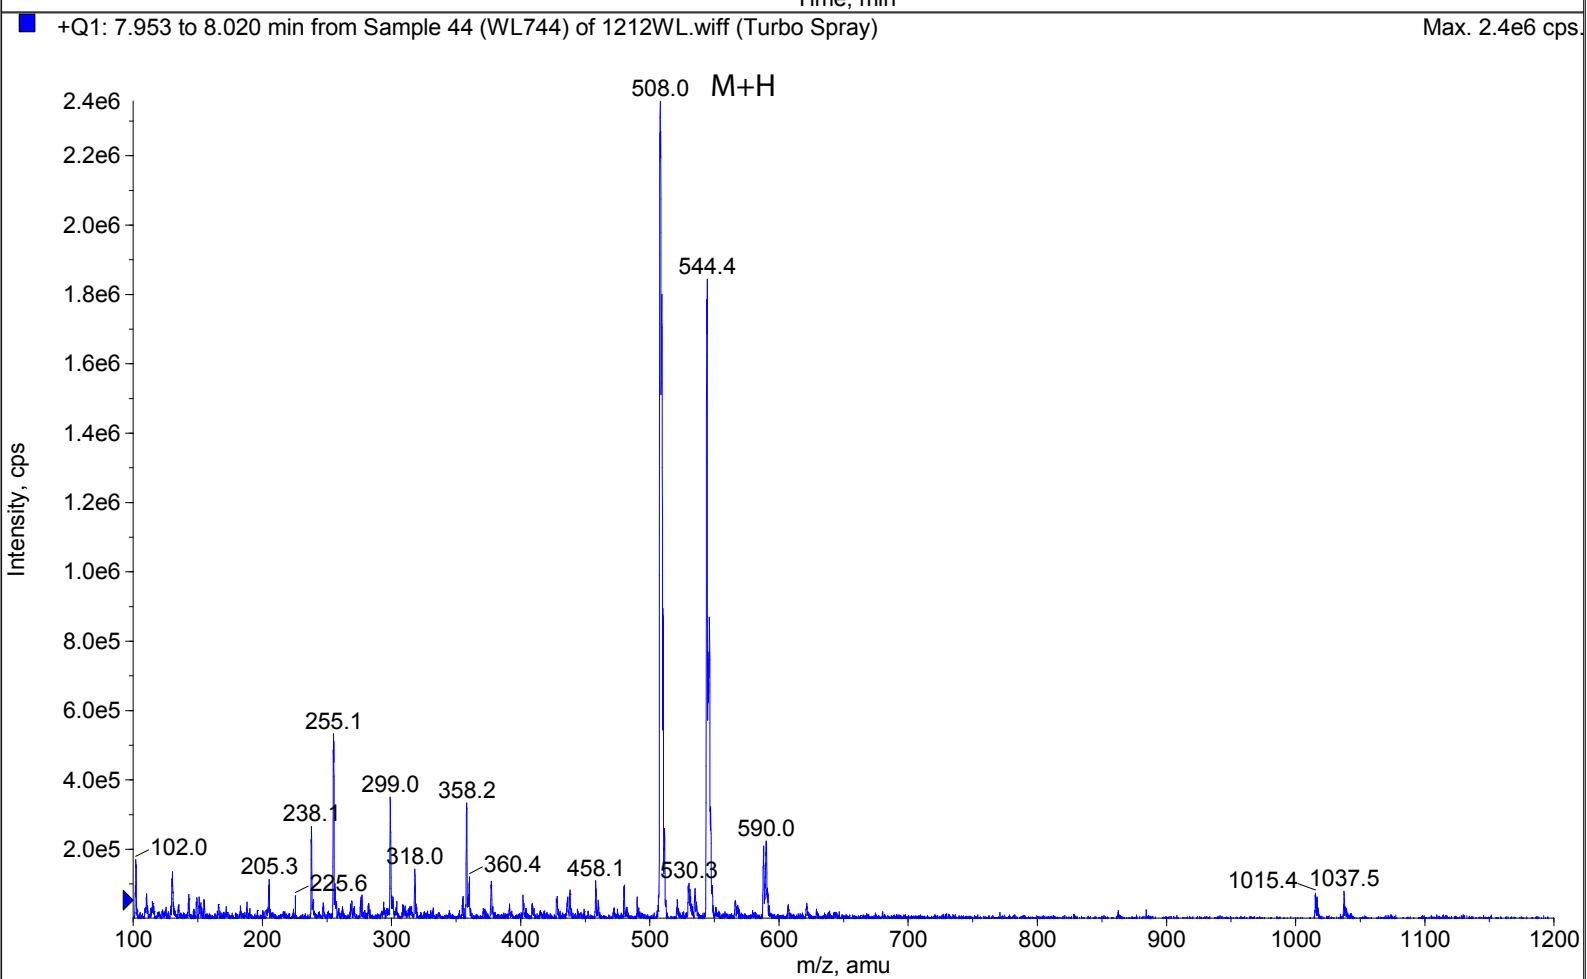

S3Et

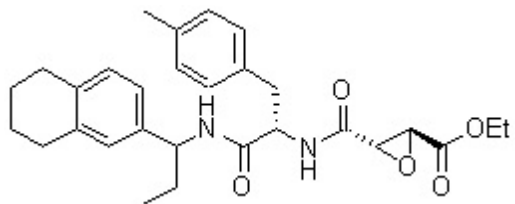

7.13  
6.99  
6.97  
6.96  
6.89  
6.86  
6.84

4.71  
4.69  
4.68  
4.66  
4.65  
4.63  
4.59  
4.57

4.26  
4.26  
4.25  
4.25  
4.24

3.62  
3.61  
3.57  
3.57  
3.47

3.26  
3.25  
3.19  
3.02  
3.00

2.83  
2.81  
2.78  
2.75  
2.74  
2.73  
2.28

1.84  
1.83  
1.82  
1.81  
1.81  
1.80  
1.79  
1.79

1.77  
1.76  
1.74  
1.61

0.89  
0.88  
0.76  
0.75  
0.74

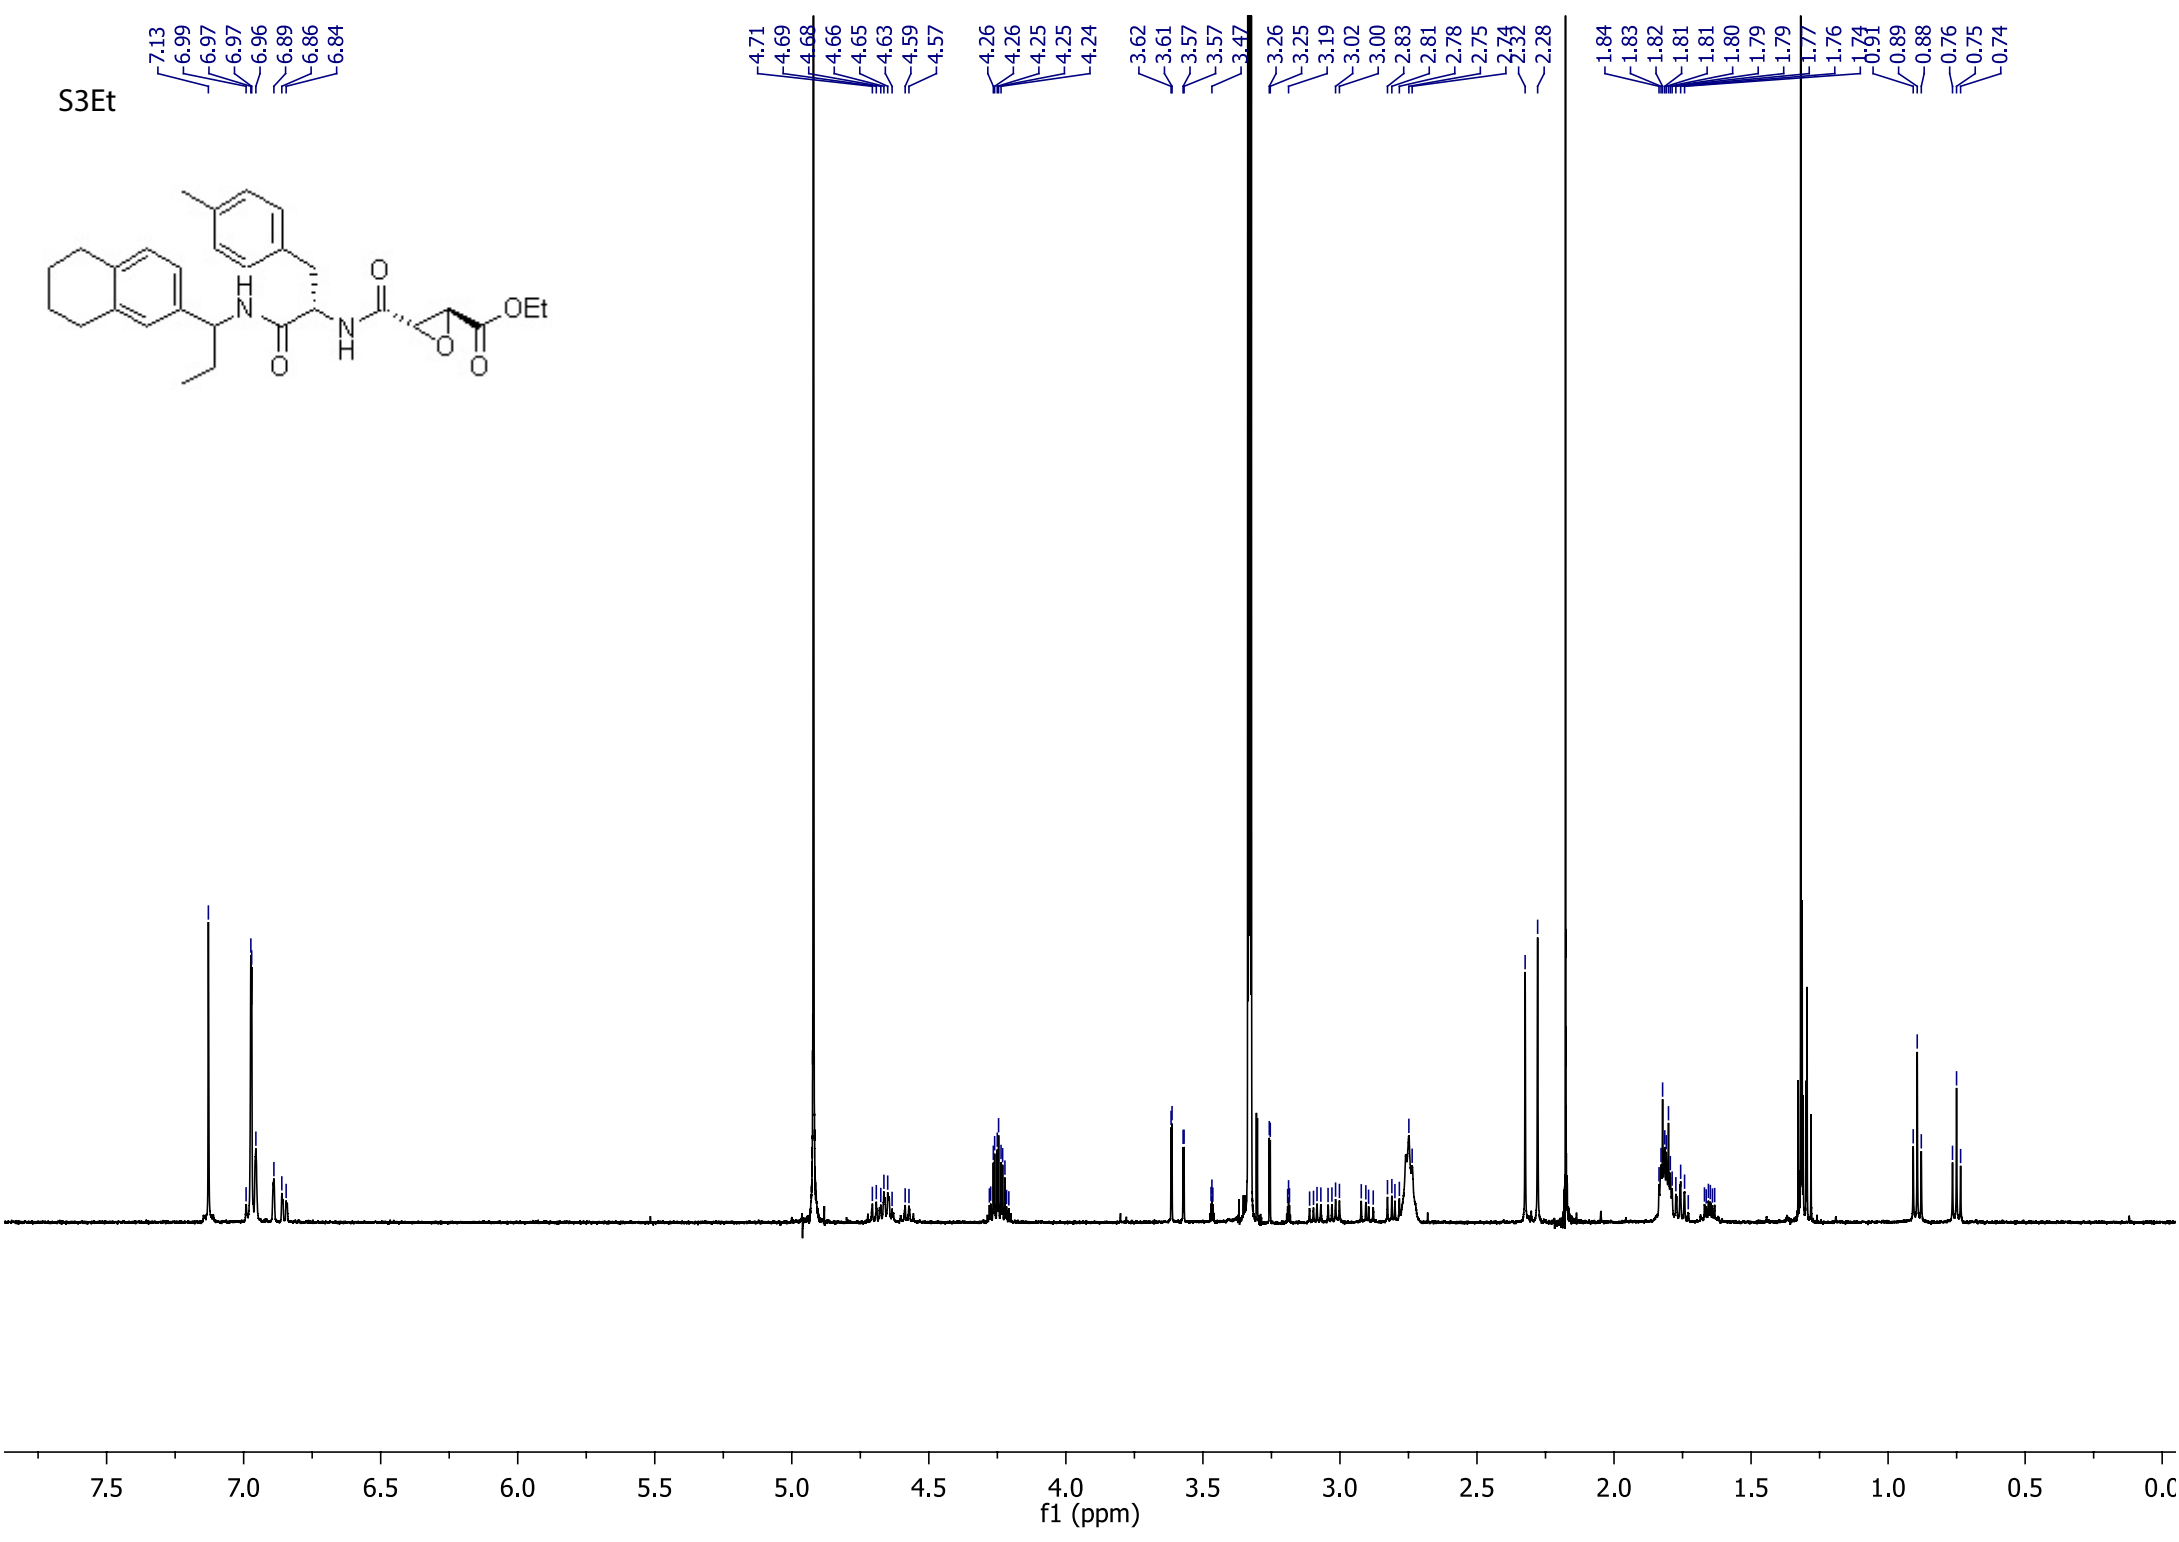

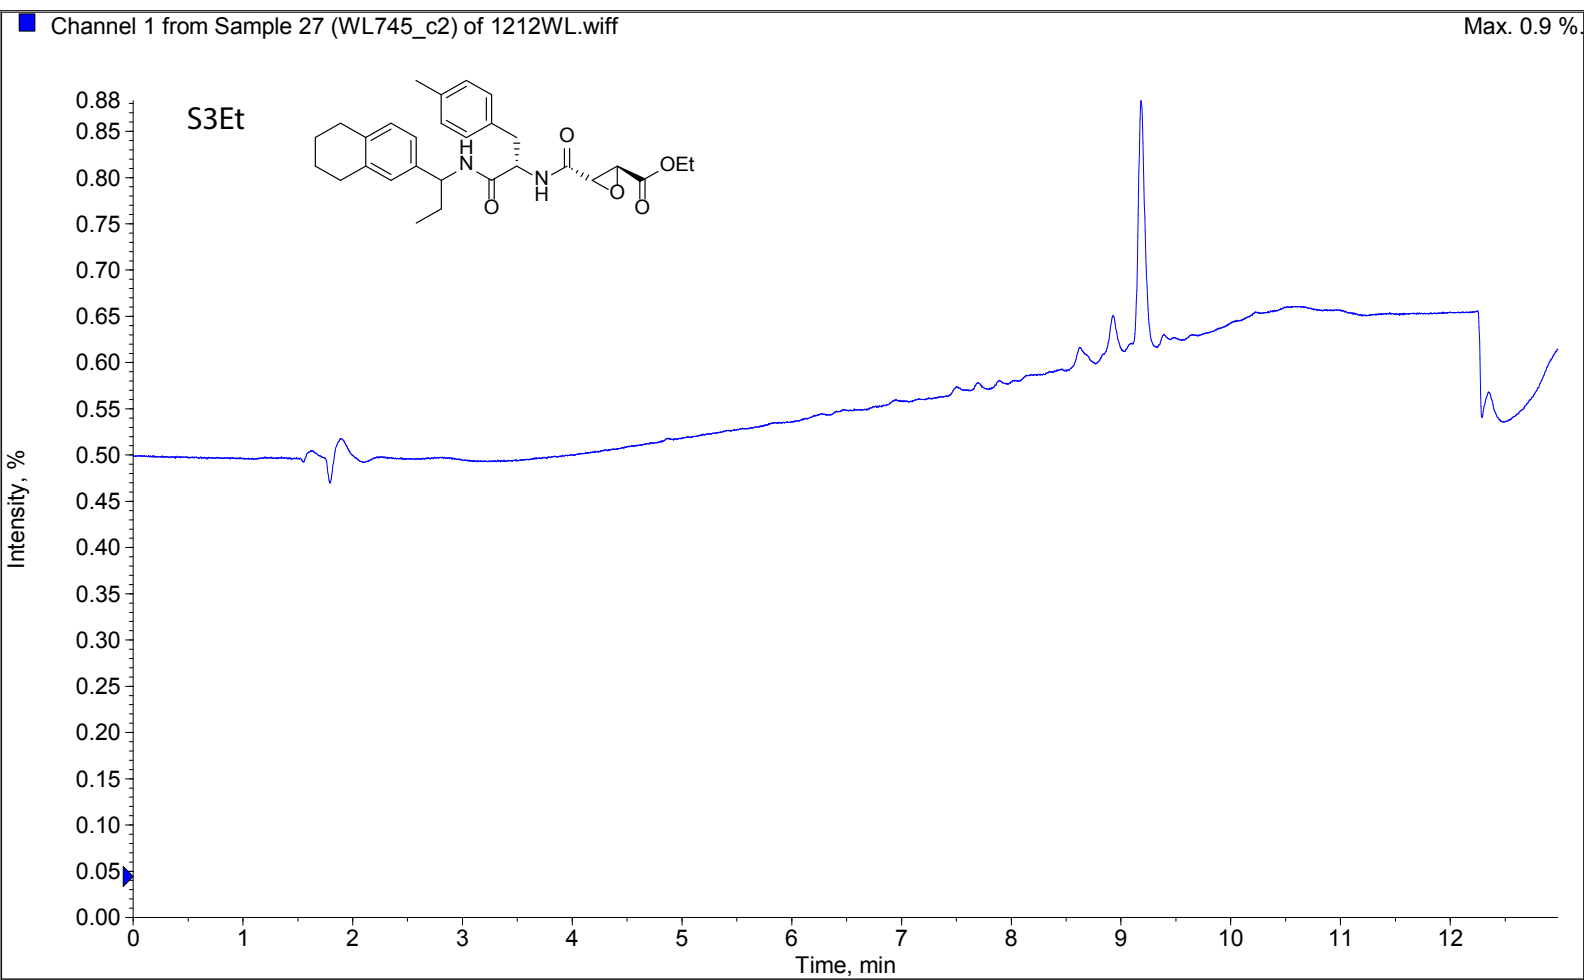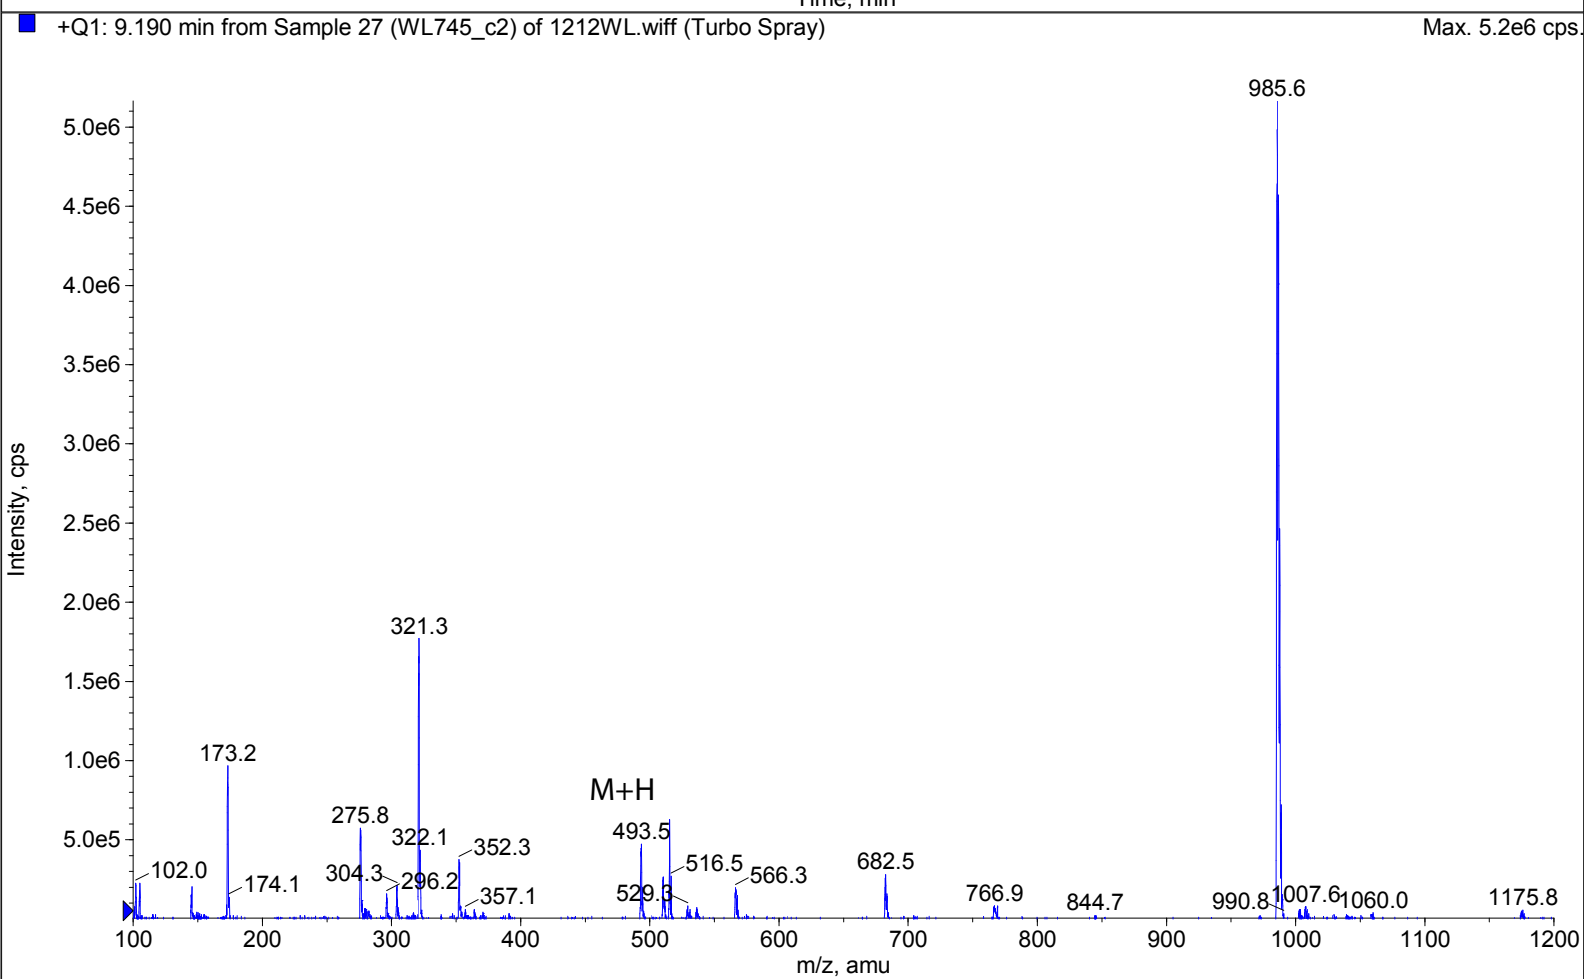

WL746H  
STANDARD PROTON PARAMETERS

S4Et

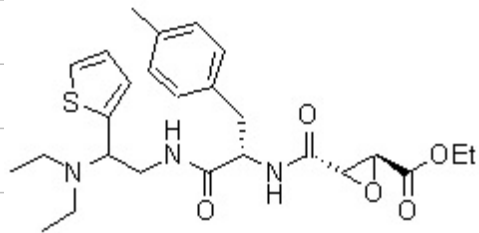

7.72  
7.72  
7.44  
7.43  
7.38  
7.38  
7.23  
7.22  
7.21  
7.20  
7.14  
7.12  
7.09  
7.09  
7.08  
7.07

5.03  
5.01  
5.00  
4.98  
4.27  
4.27  
4.27  
4.26  
4.25  
4.25  
4.24  
3.59  
3.58  
3.58  
3.57  
3.47  
3.46  
3.28  
3.27  
3.19  
2.90  
2.88  
2.88  
2.88  
2.32

1.45  
1.42  
1.37  
1.33  
1.33  
1.32  
1.32  
1.30  
1.30

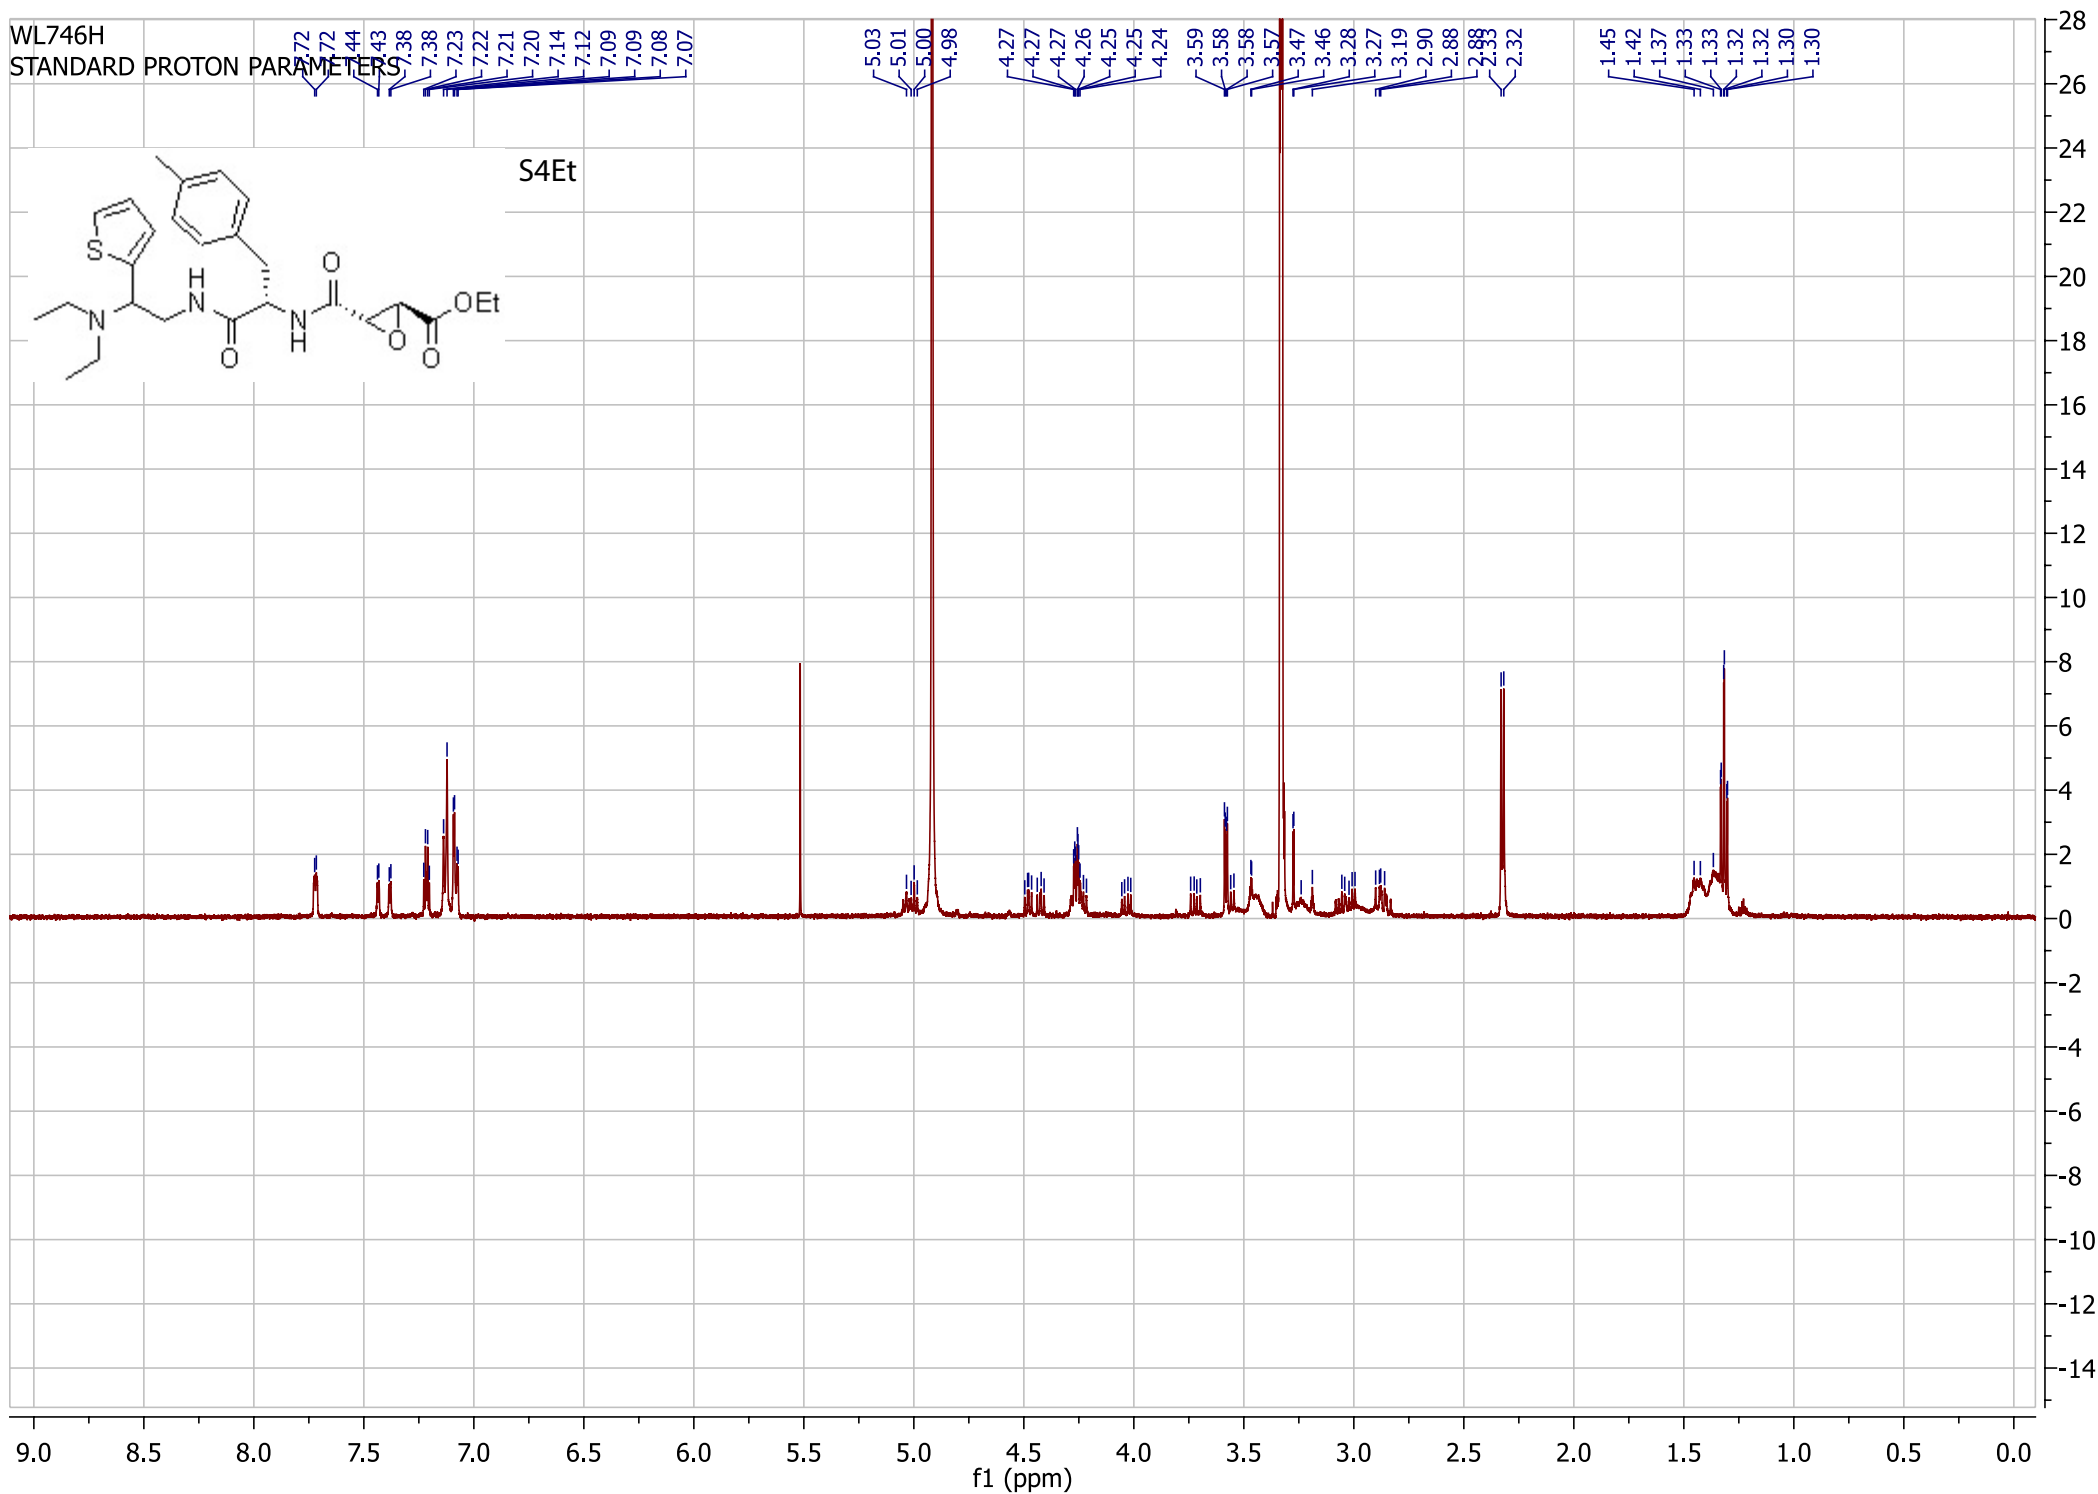

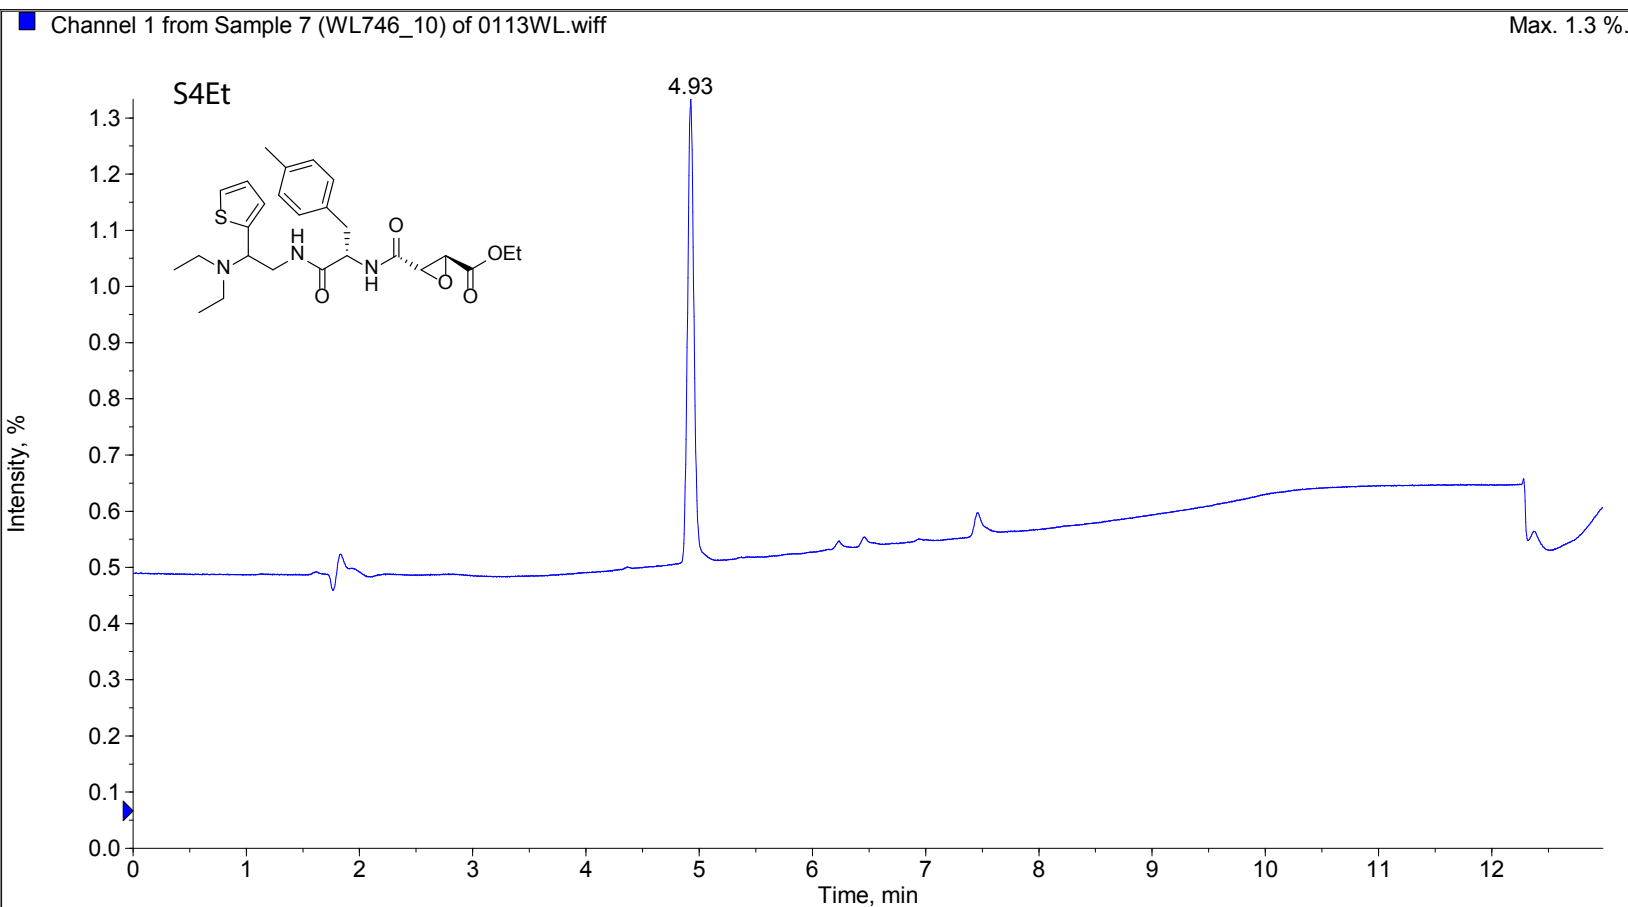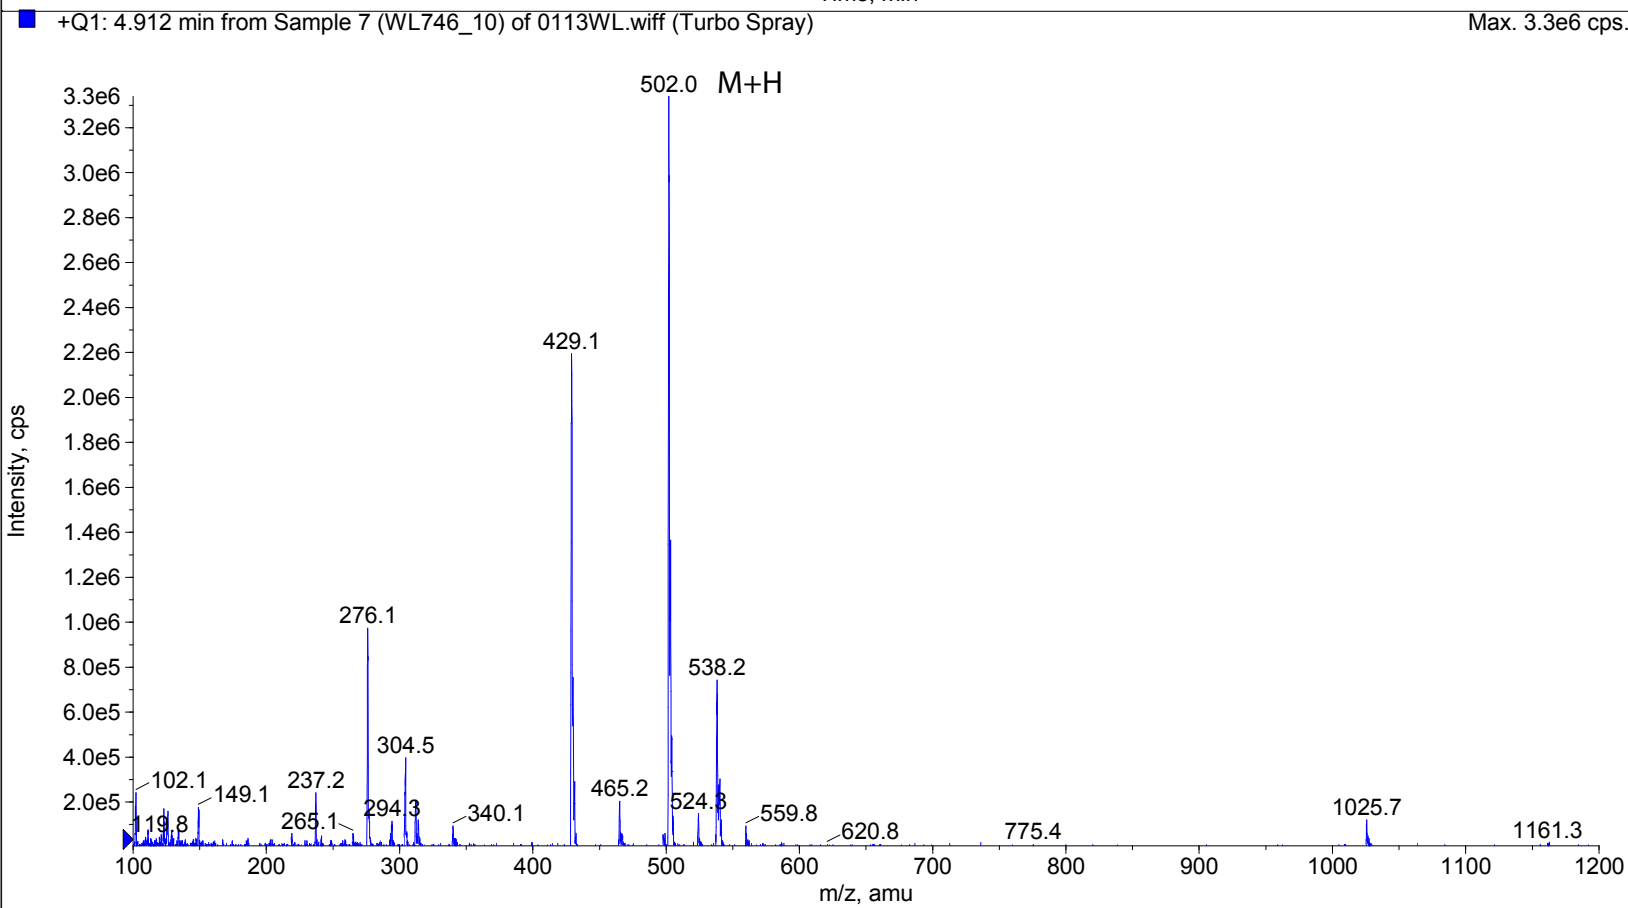

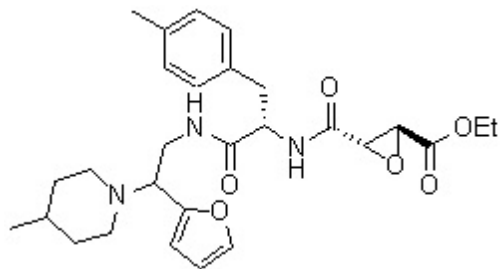

S5Et

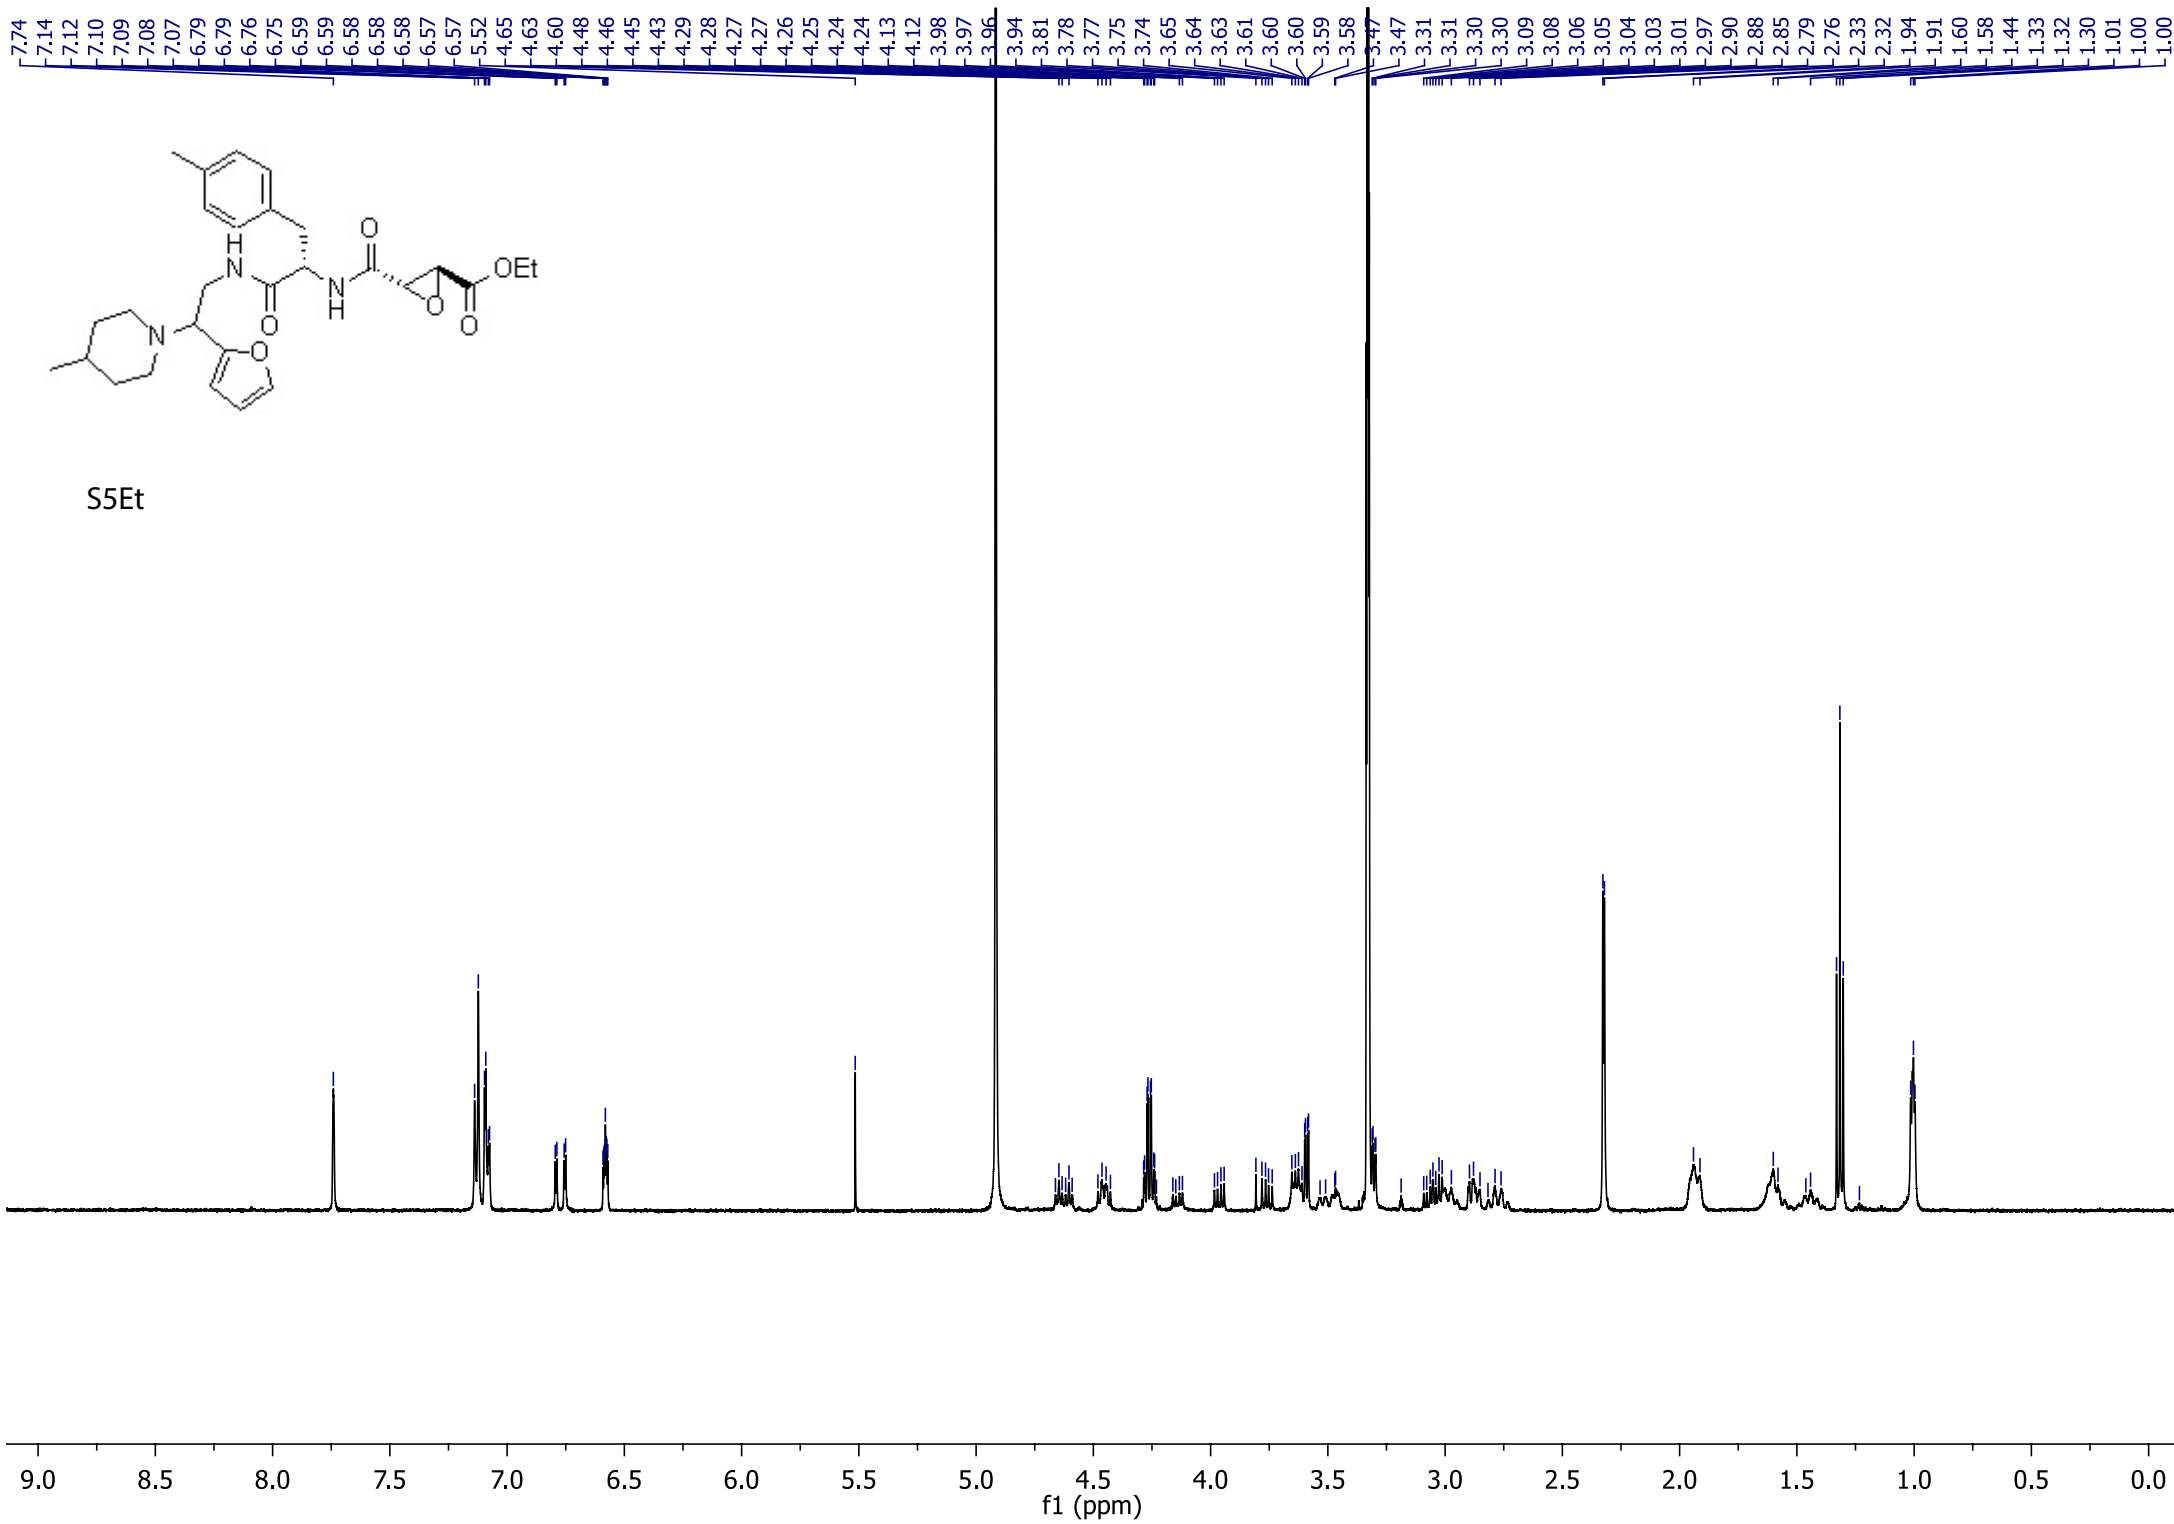



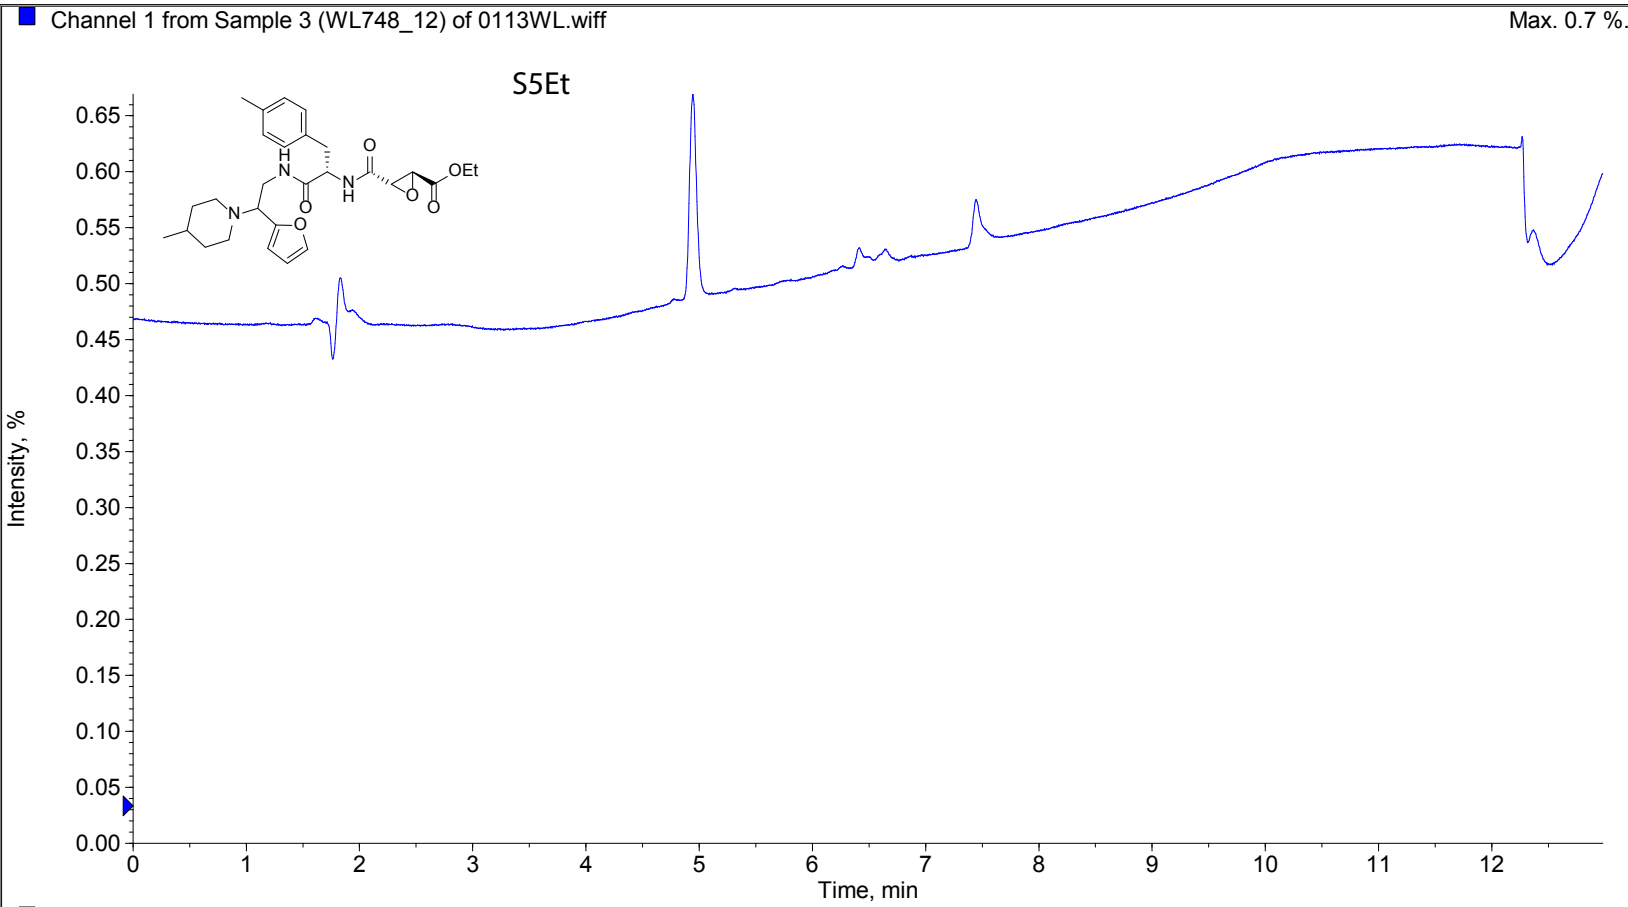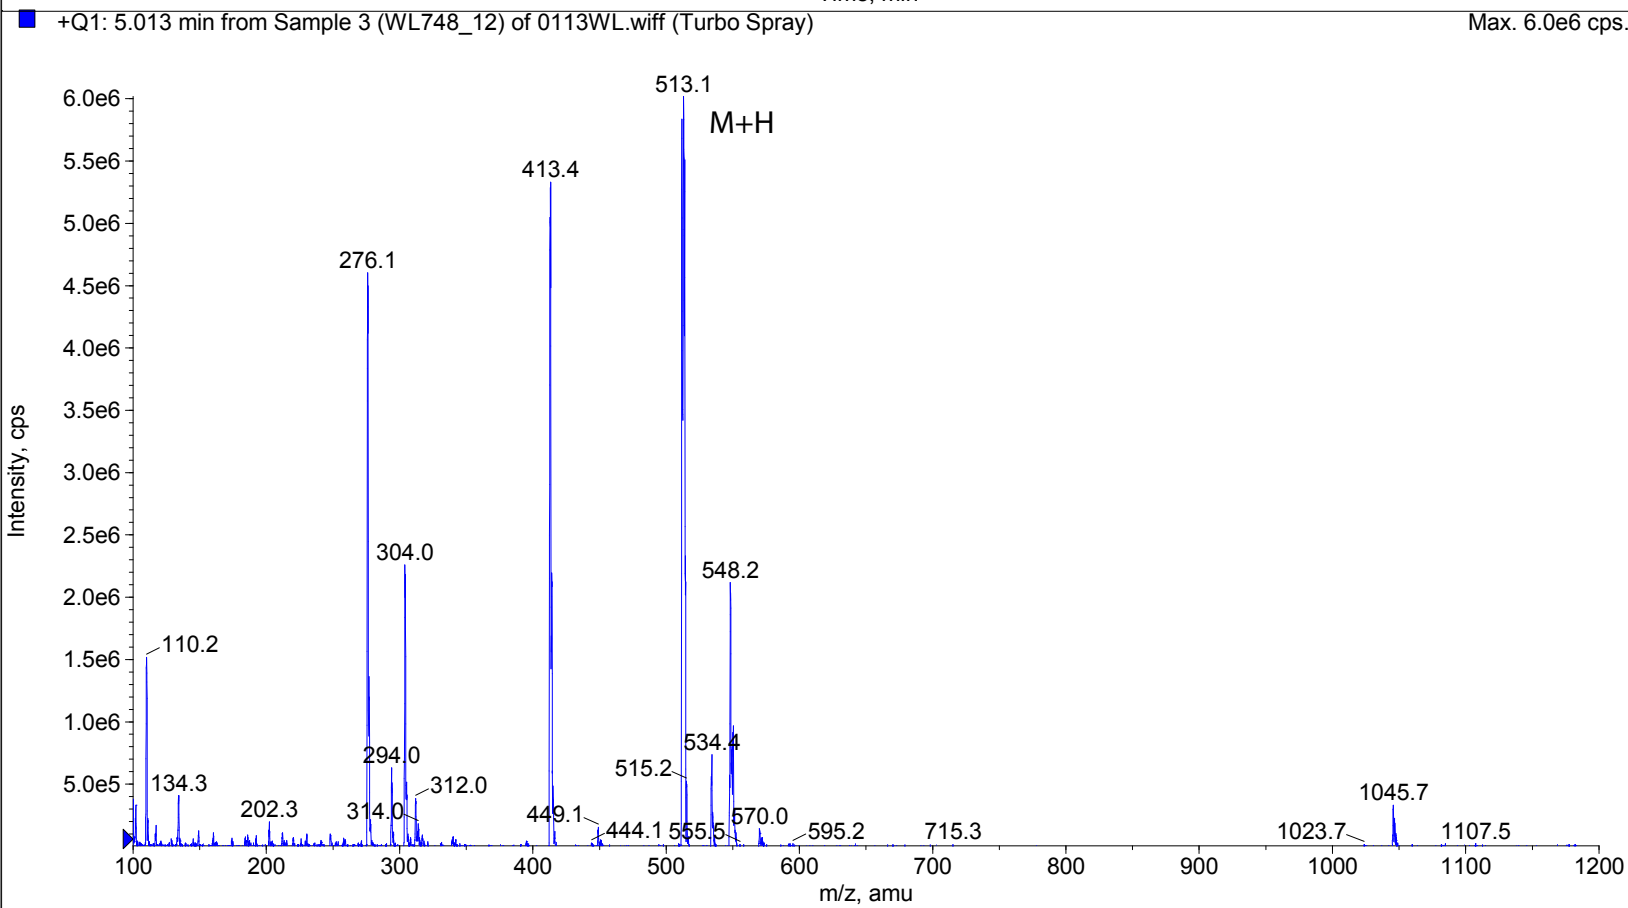

S6Et

7.26  
7.26  
7.02  
7.00  
6.97  
6.96  
6.95  
6.93  
6.91

4.52  
4.50  
4.48  
4.46  
4.27  
4.27  
4.25  
4.23  
4.23  
4.22  
4.20  
4.19

3.64  
3.63  
3.61  
3.59  
3.58

3.13  
3.12  
3.05  
3.04  
3.02  
3.01  
2.91  
2.89  
2.87  
2.87

1.32  
1.30  
1.28

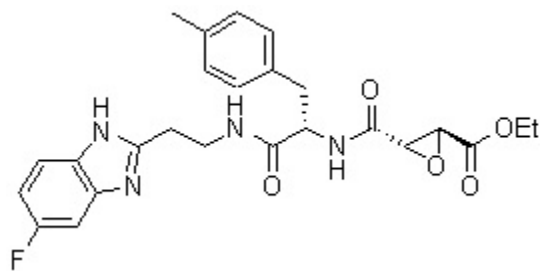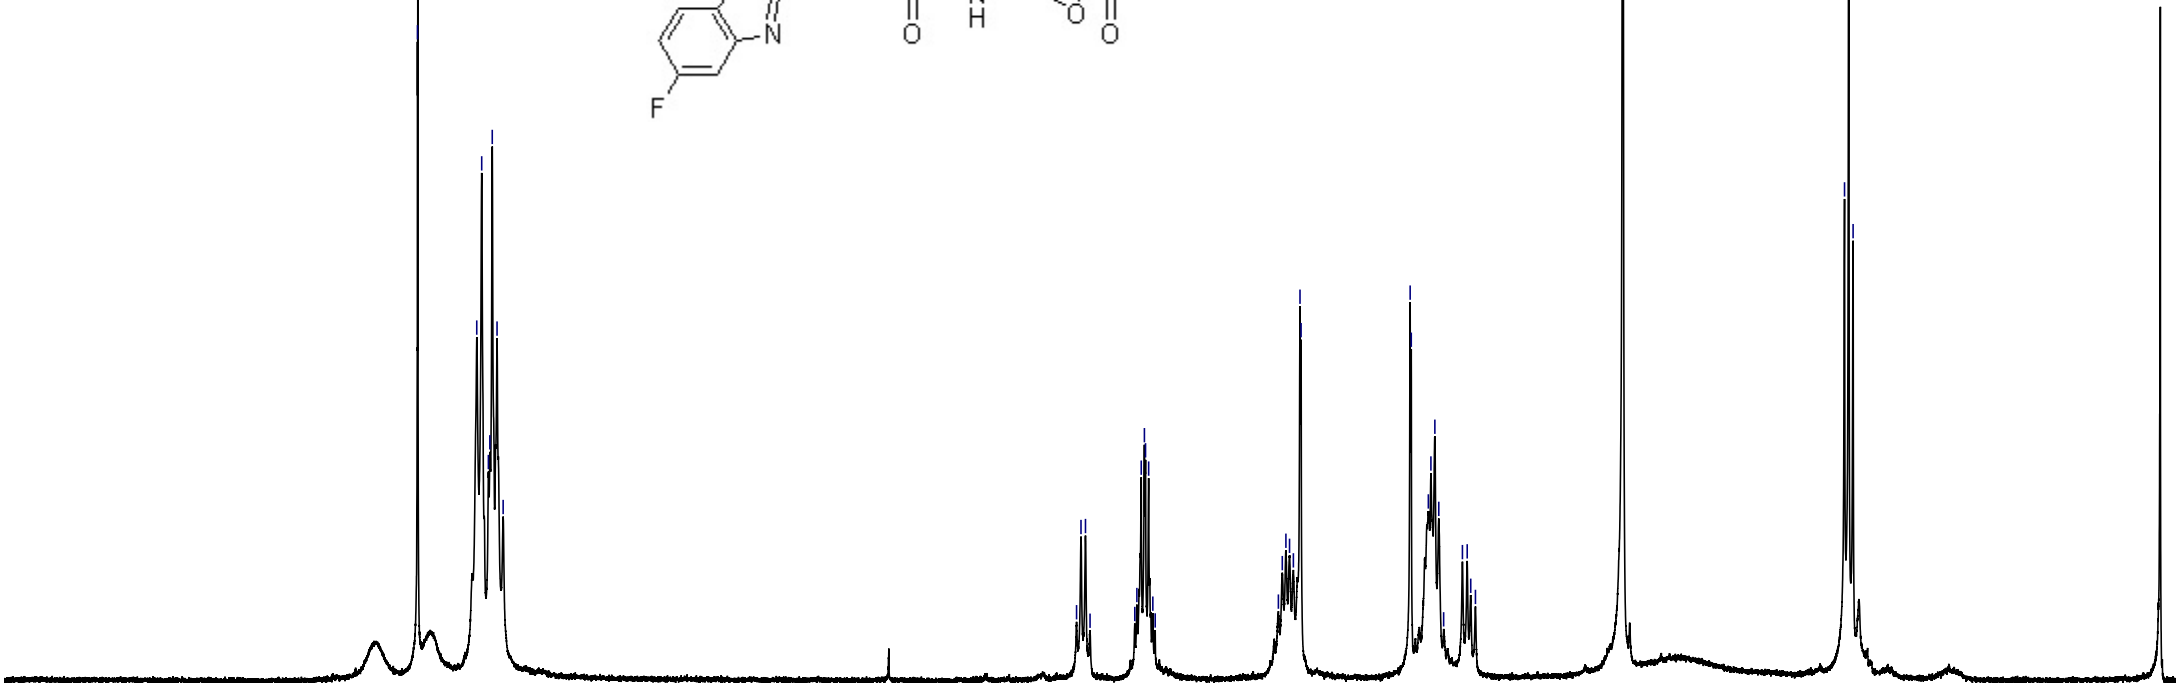

8.5 8.0 7.5 7.0 6.5 6.0 5.5 5.0 4.5 4.0 3.5 3.0 2.5 2.0 1.5 1.0 0.5 0.0

f1 (ppm)

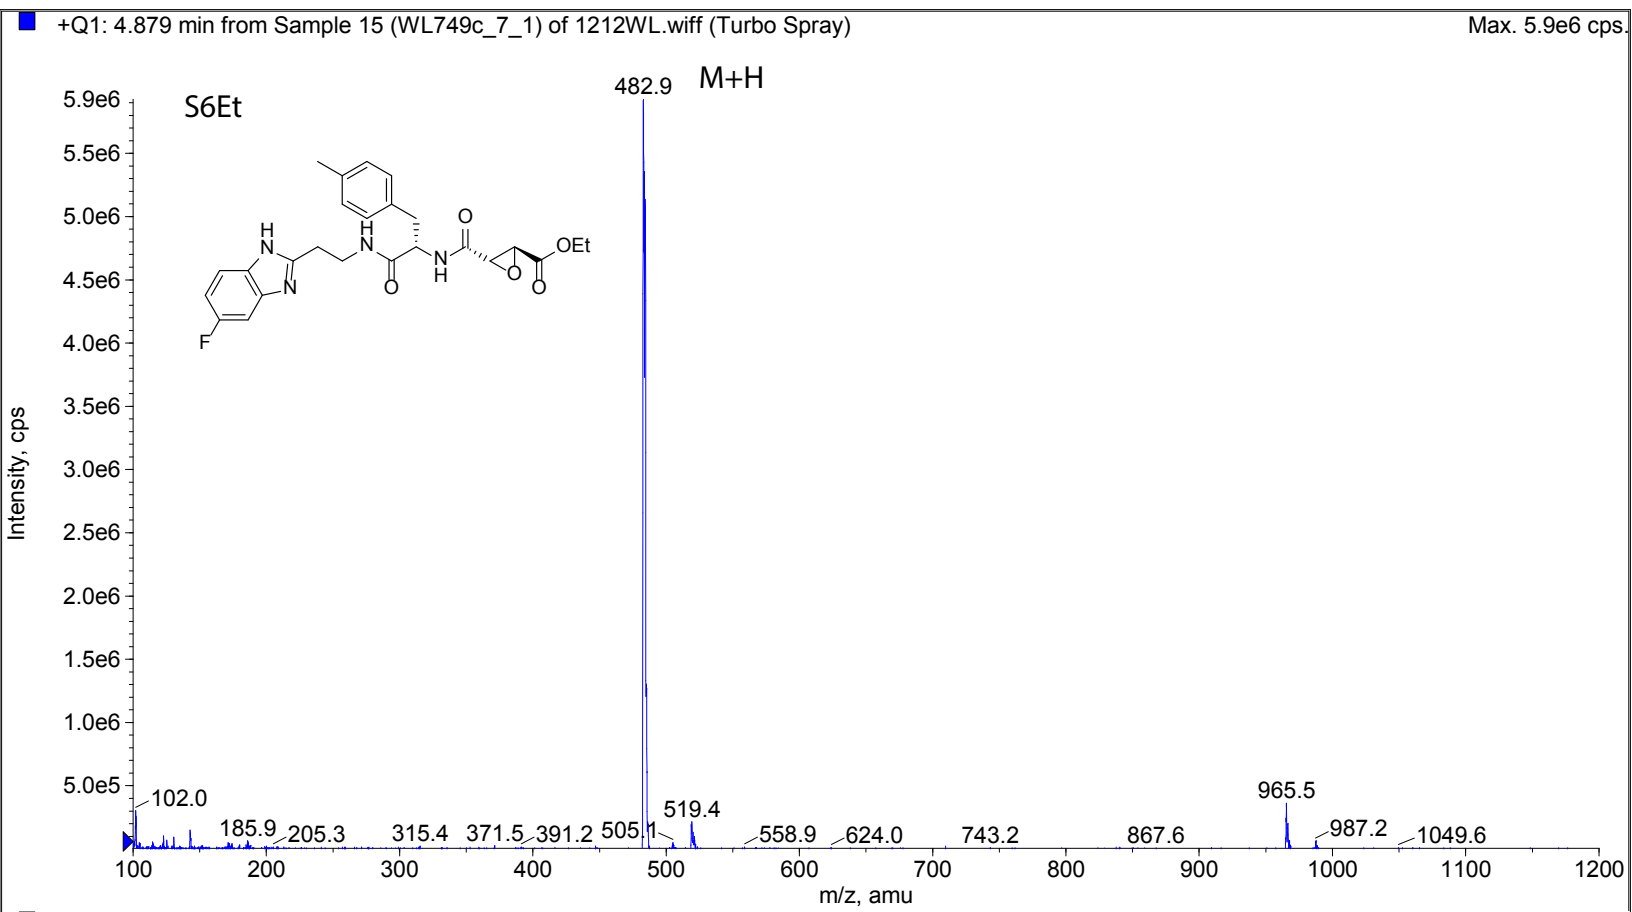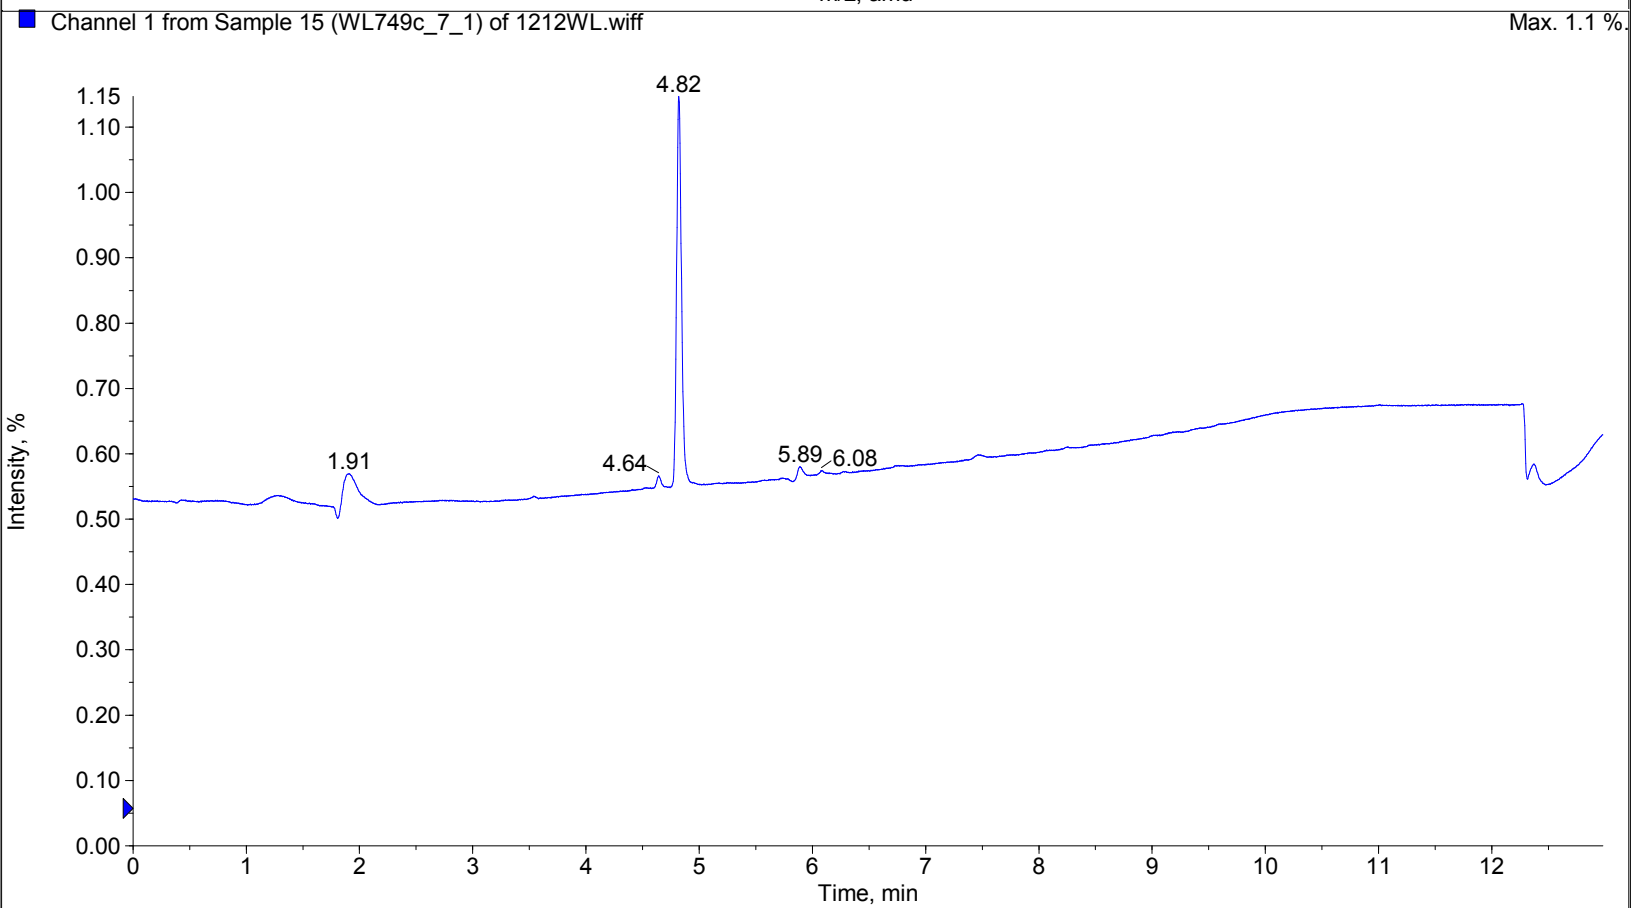

S7Et

8.38  
7.93  
7.91  
7.91  
7.90  
7.84  
7.55  
7.51  
7.50  
7.49  
7.26  
7.05  
6.88  
6.67  
6.66  
6.64

4.78  
4.76  
4.71  
4.69  
4.67  
4.65  
4.26  
4.25  
4.24  
4.23  
4.22  
3.65  
3.64  
3.13  
3.11  
3.10  
3.08  
3.05  
3.05  
3.03  
3.01  
2.99

2.22  
1.63  
1.32  
1.30  
1.28

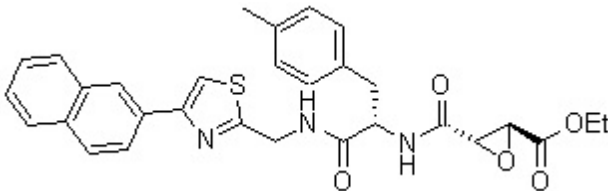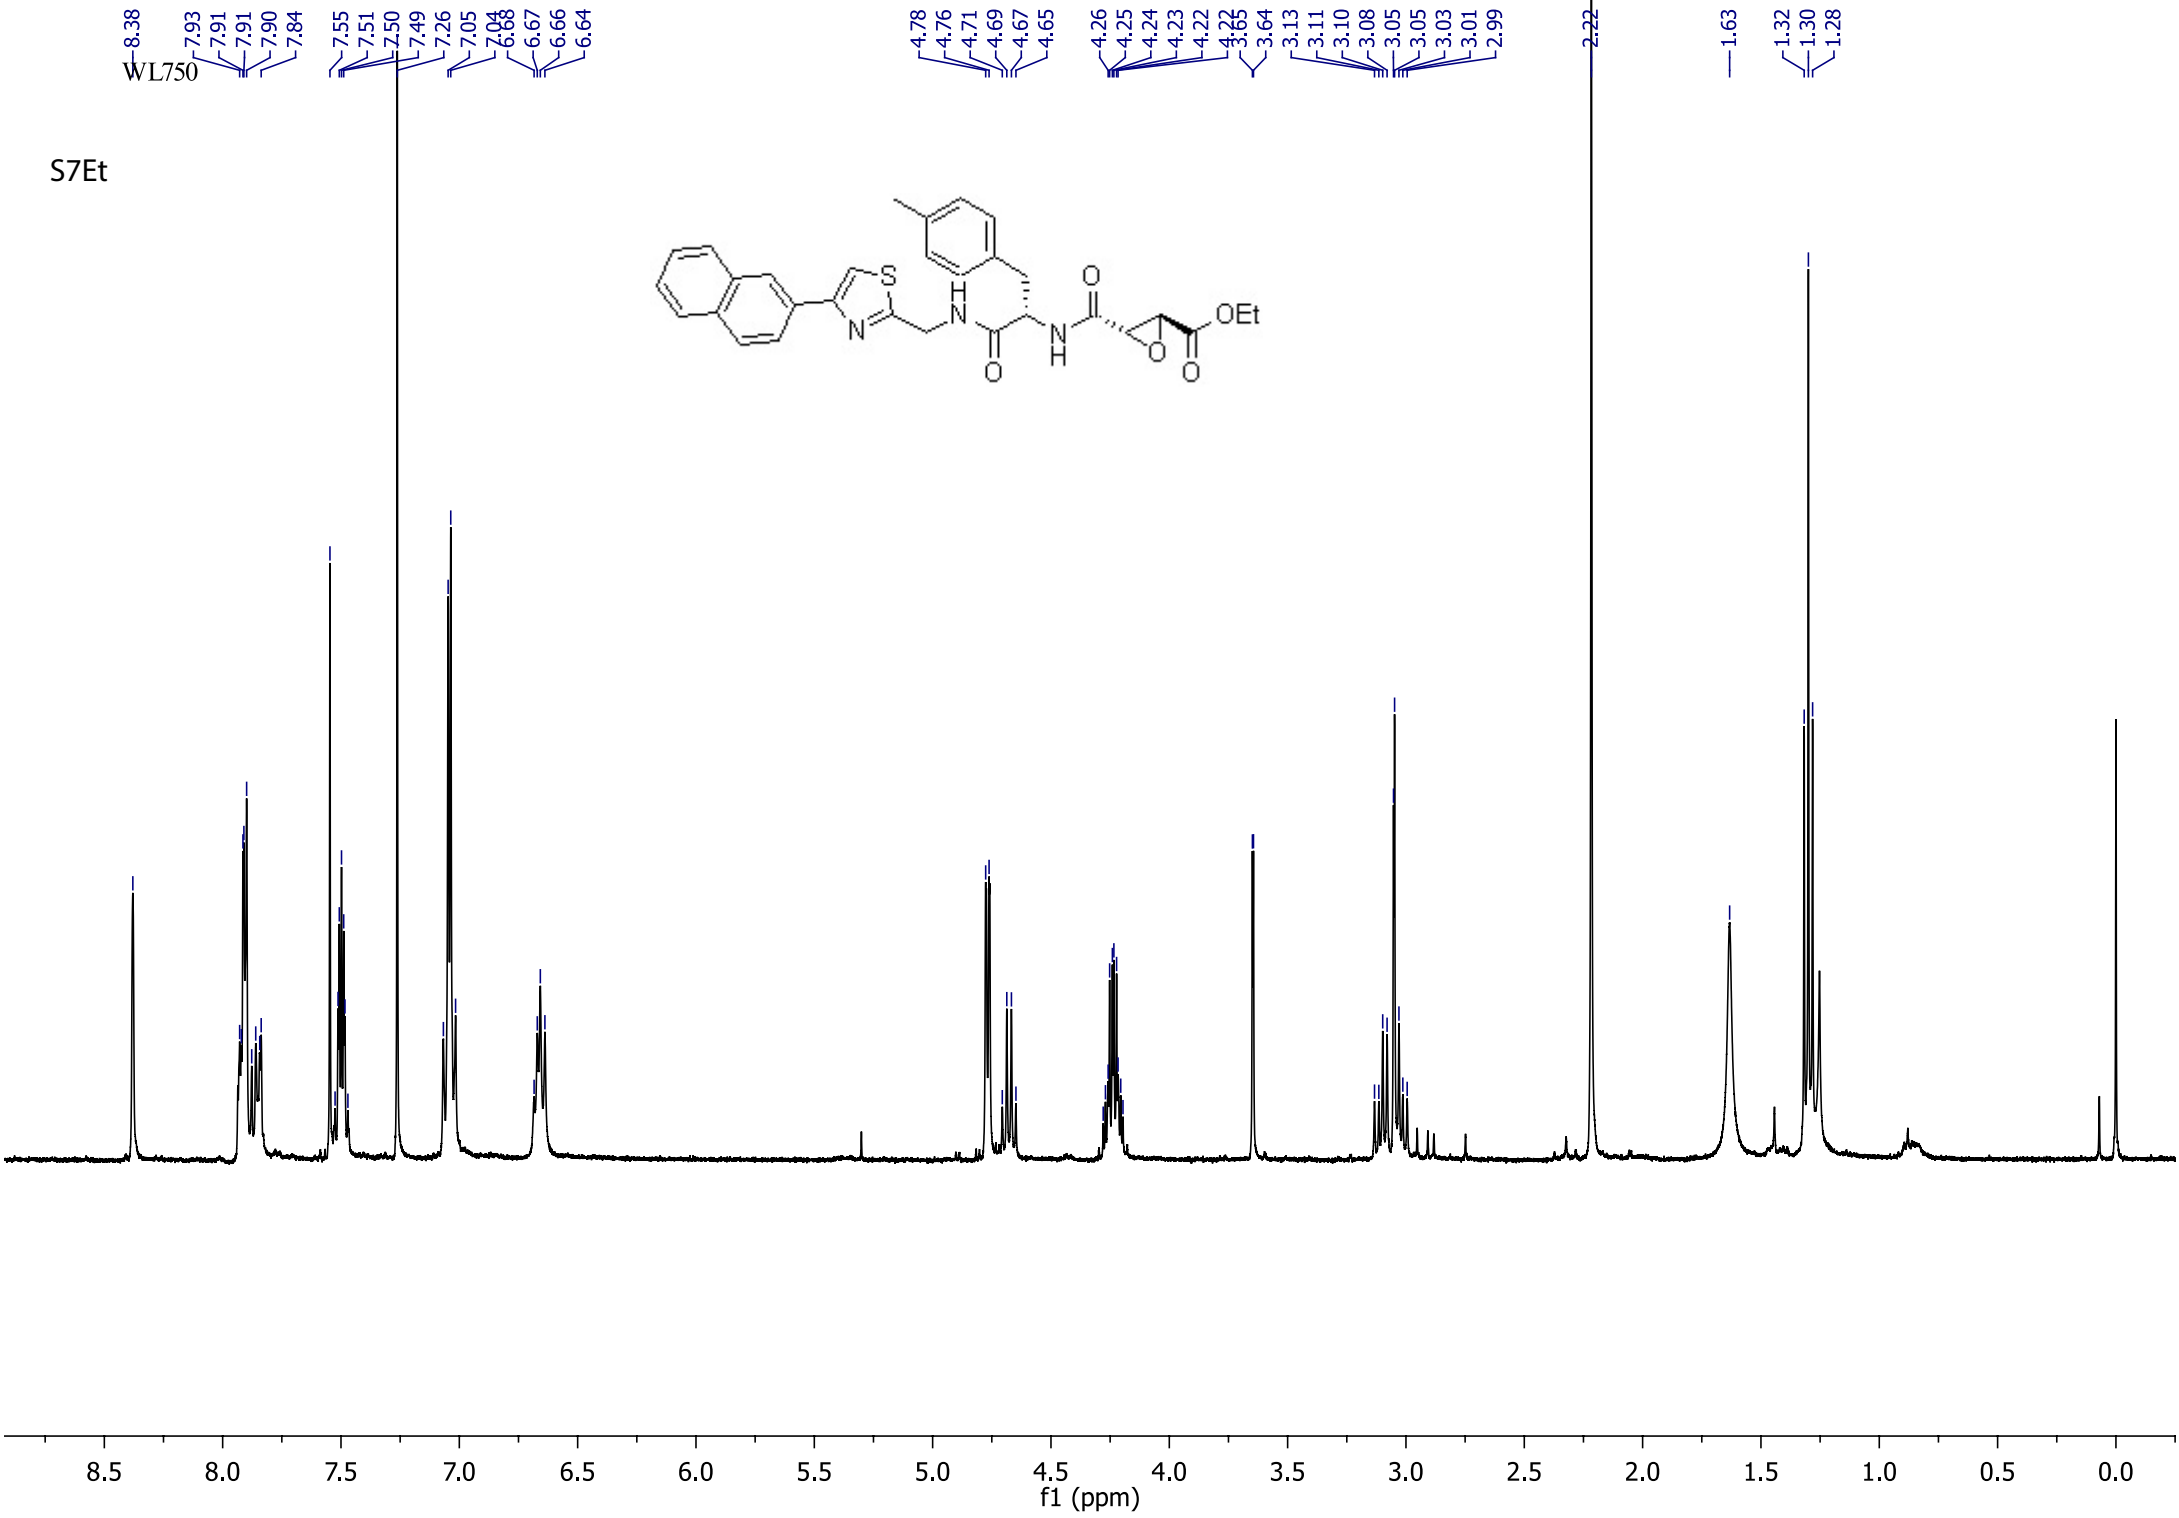

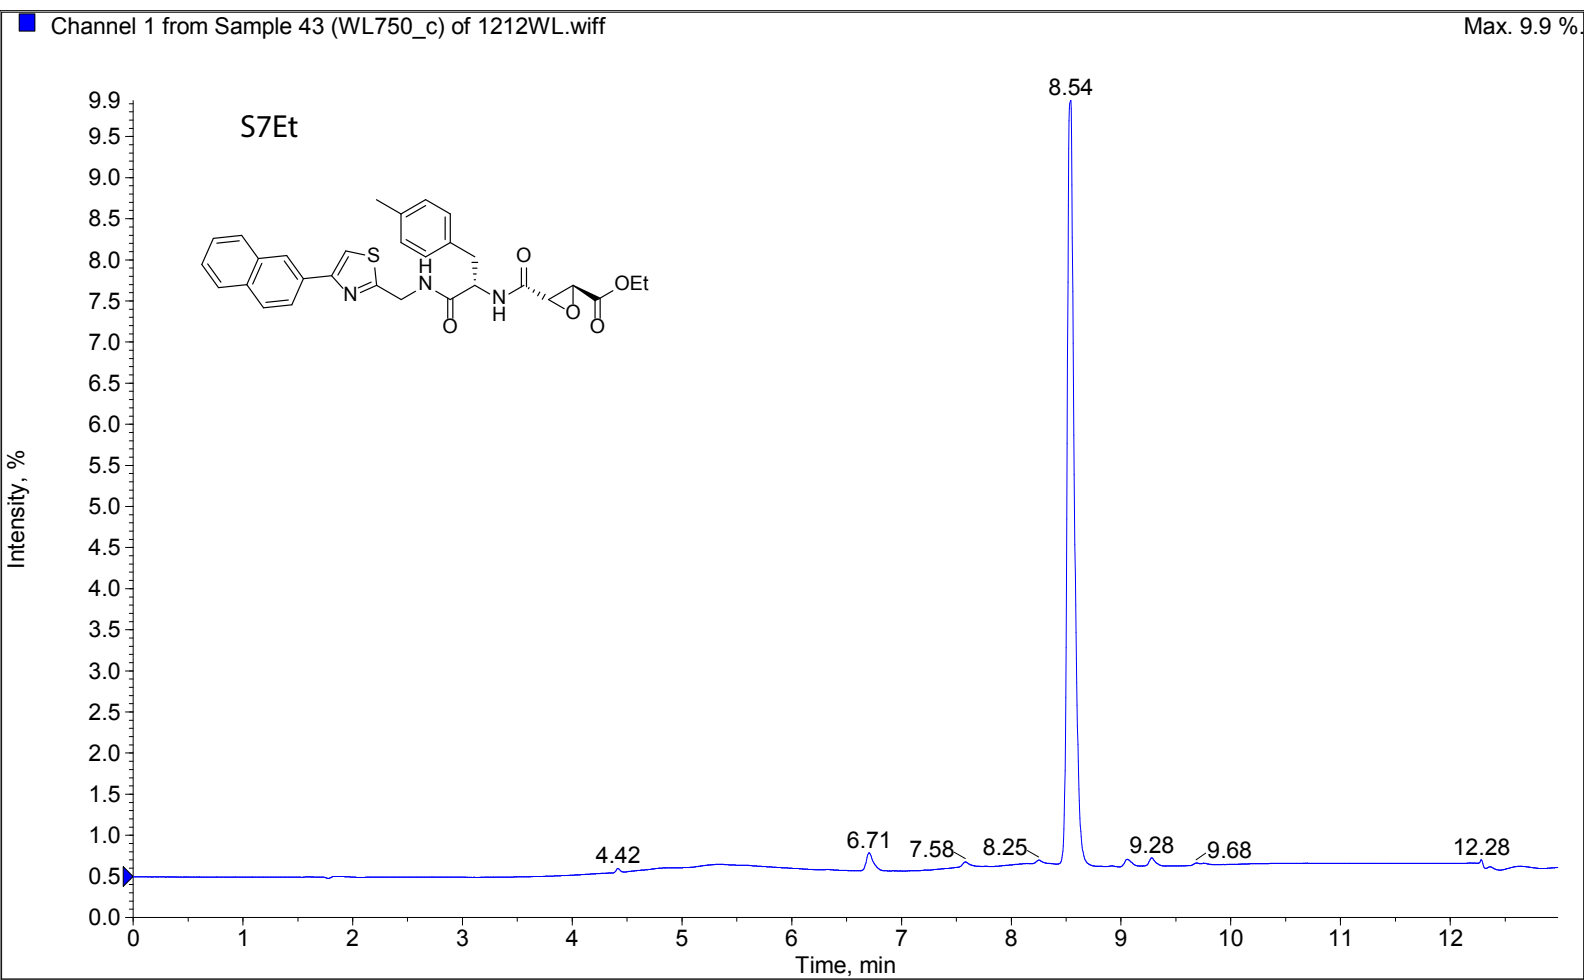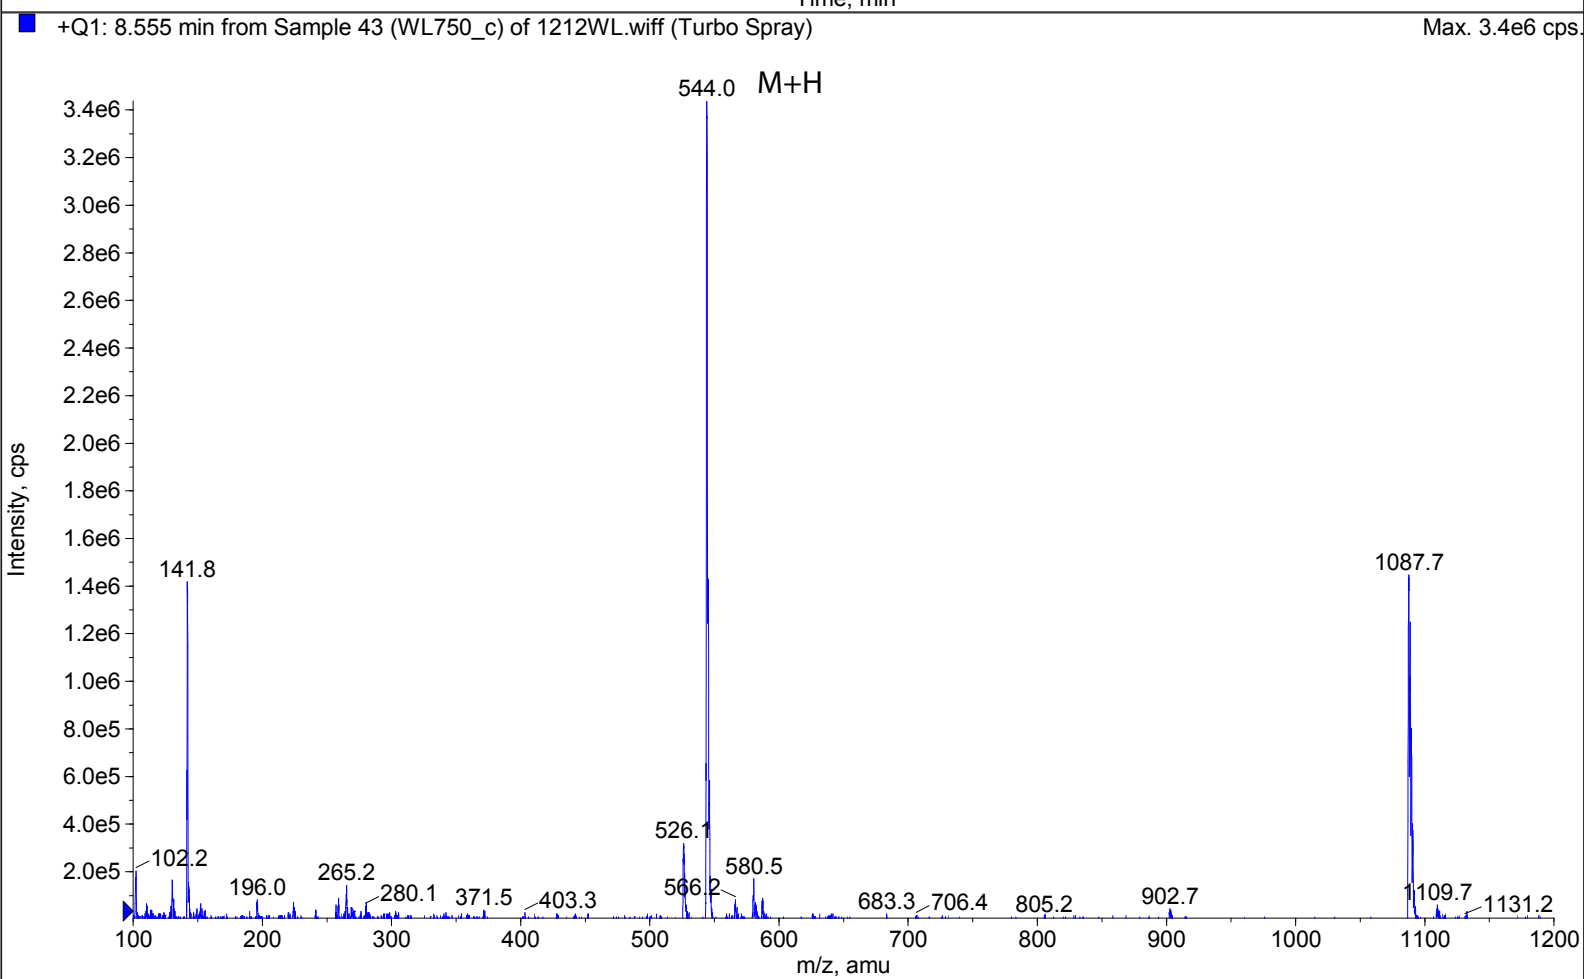



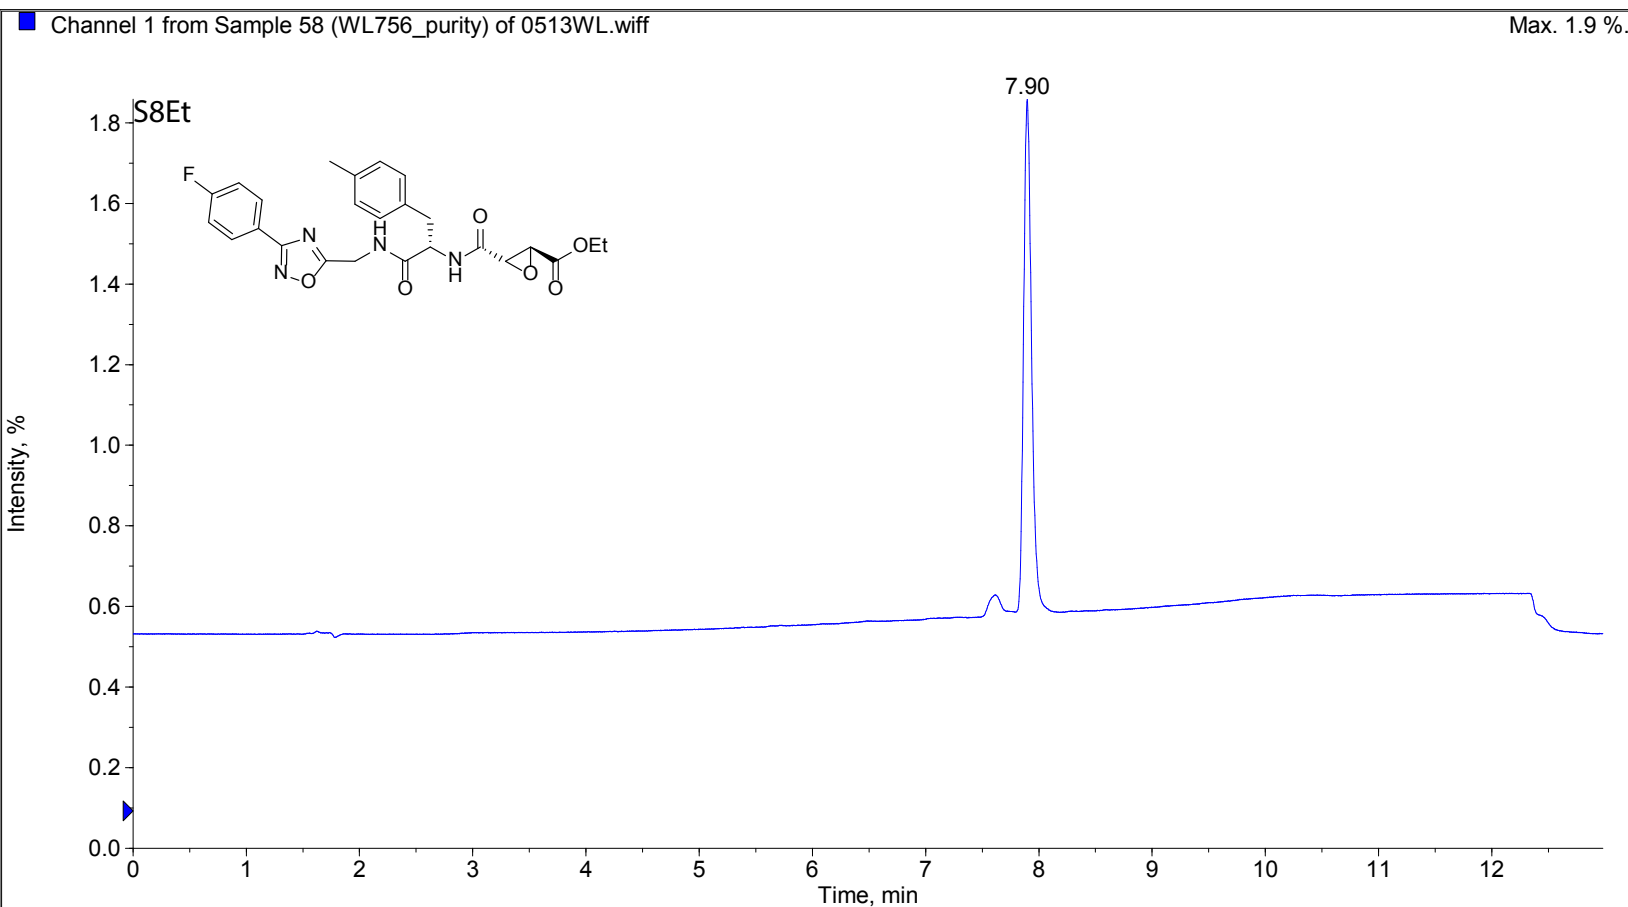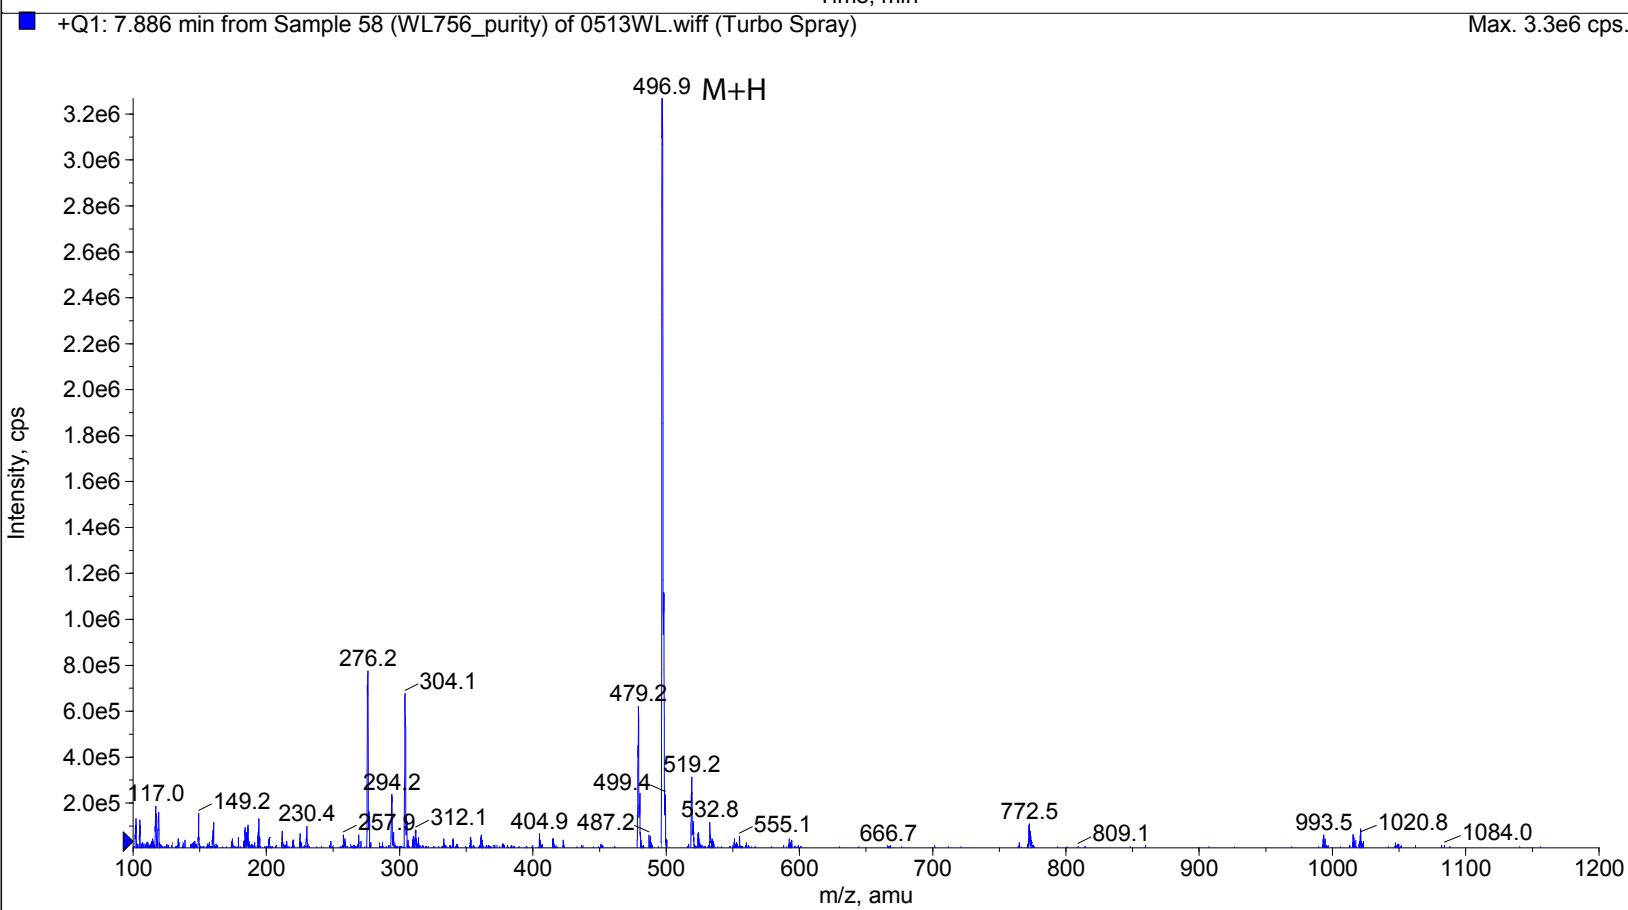

S9Et

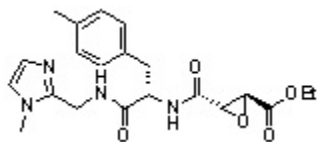

7.52  
7.52  
7.50  
7.49  
7.12  
7.10  
7.06  
7.04

4.59  
4.58  
4.58  
4.57  
4.57  
4.55

4.27  
4.26  
4.25  
4.25  
4.23  
3.76  
3.61  
3.61

3.29  
3.29  
3.13  
3.11  
3.09  
3.08  
2.95  
2.93  
2.92  
2.91

1.33  
1.31  
1.30

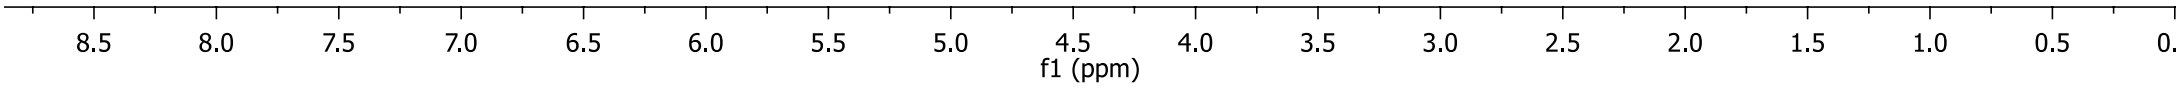



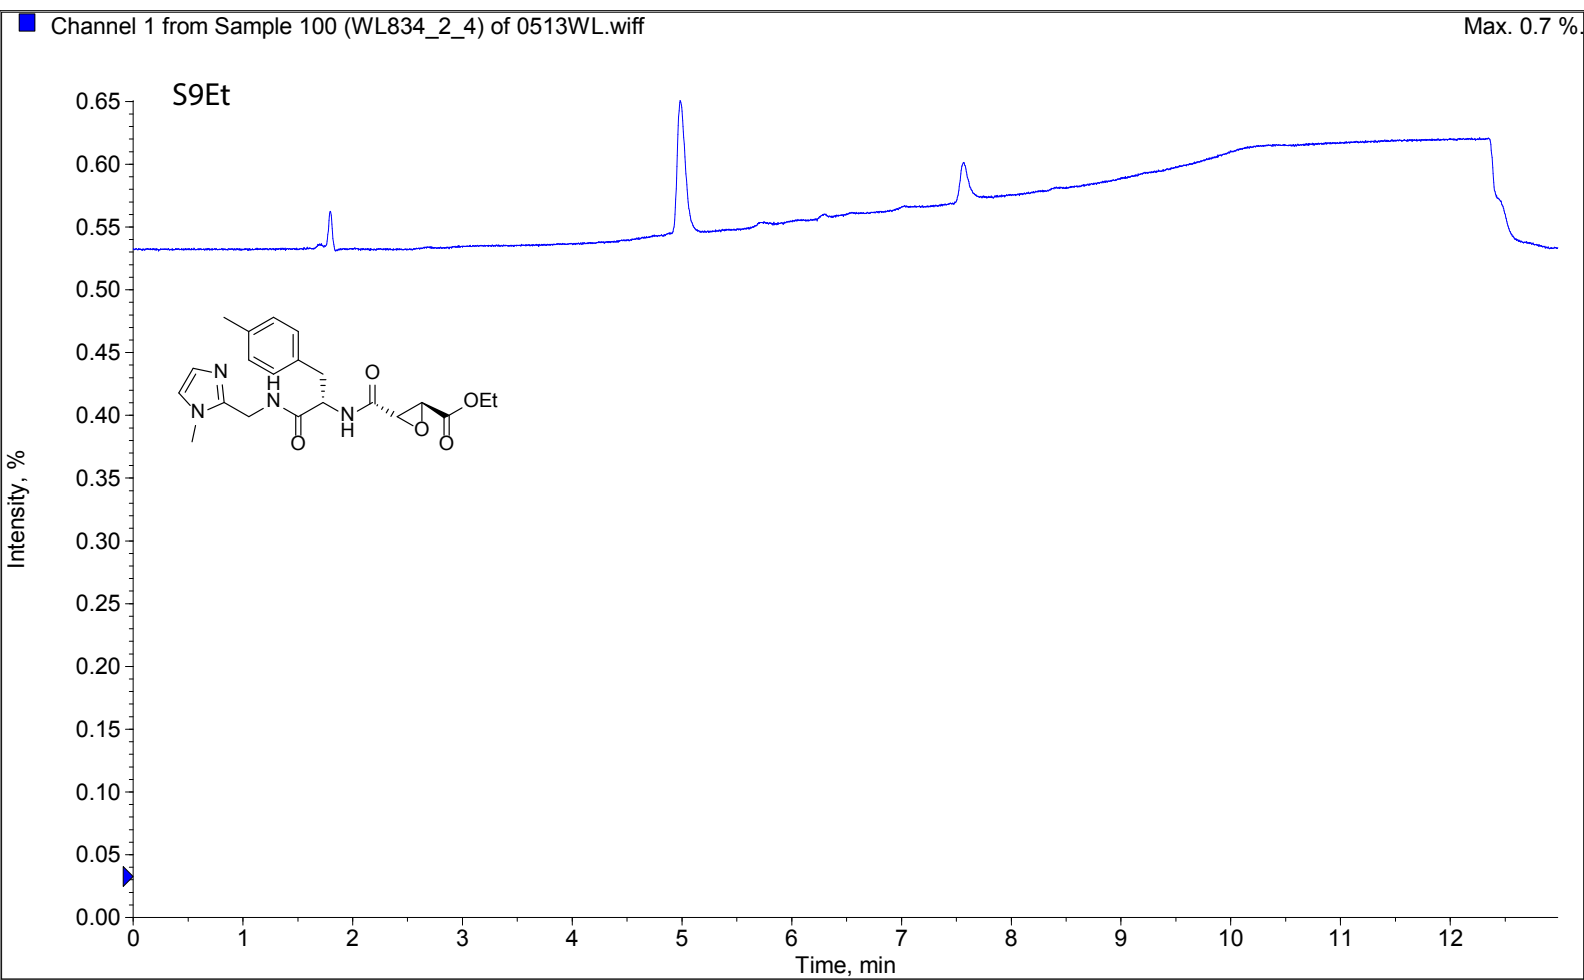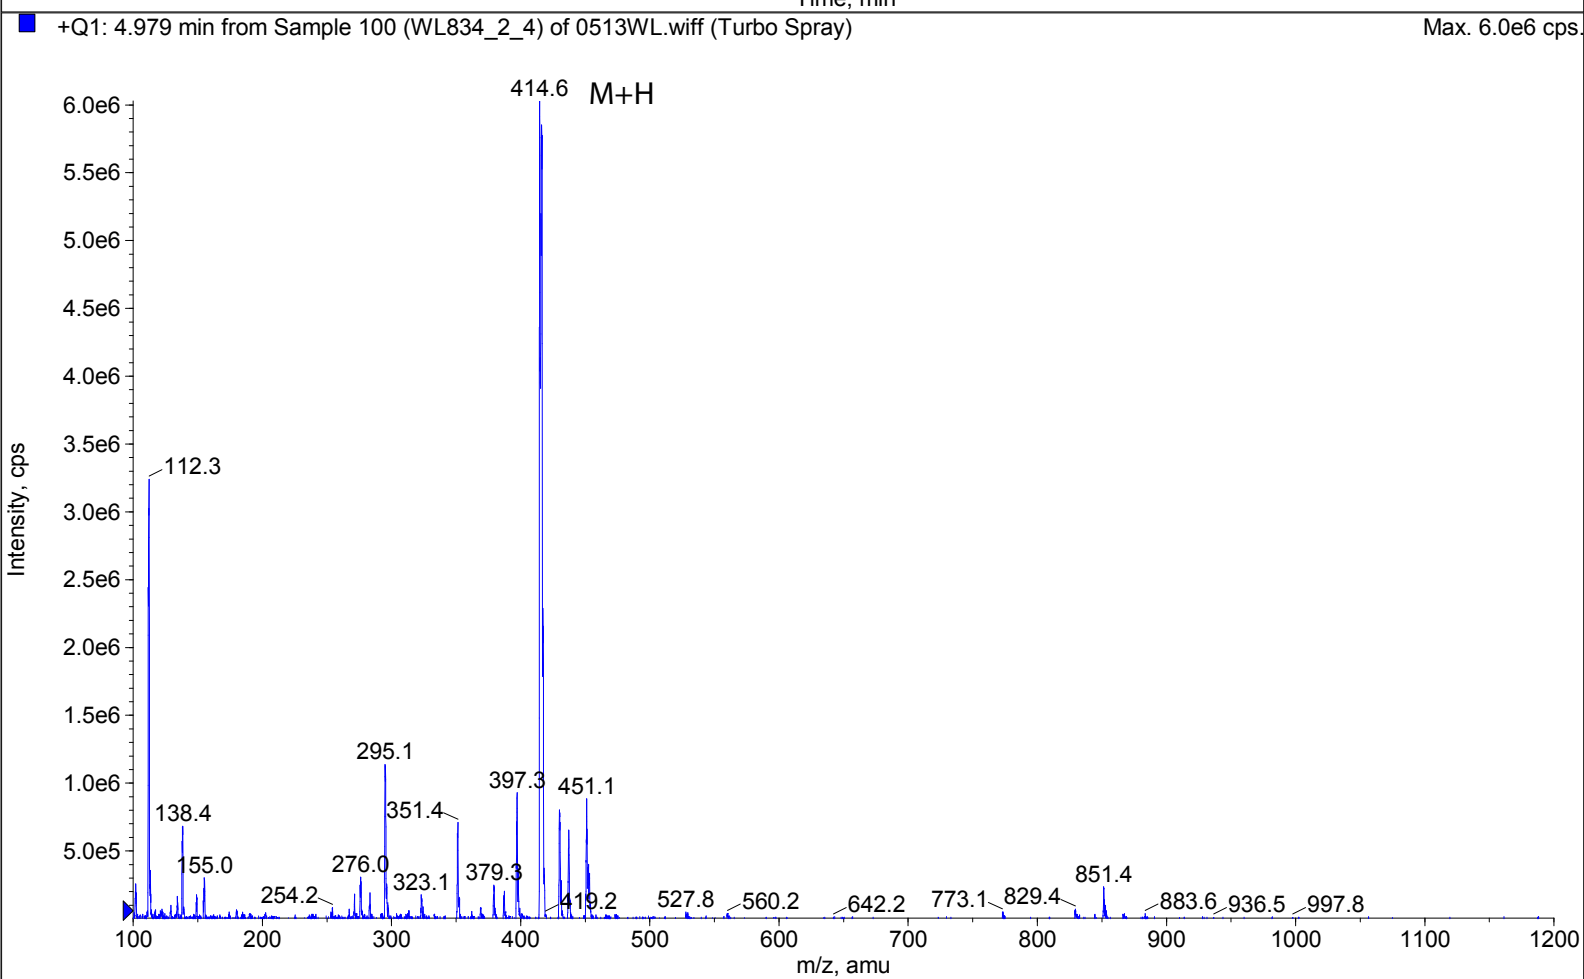

WL1031H  
Std proton

7.37  
7.37  
7.36  
7.36  
7.35  
7.28  
7.26  
7.25  
7.23  
7.07  
7.06

5.87

4.80  
4.79  
4.77  
4.76

4.21  
4.20  
4.19  
4.18  
4.17

3.52  
3.51  
3.41  
3.30  
3.30  
3.30  
3.12  
3.11  
3.05

2.44  
2.43  
2.33  
2.31  
2.27  
2.25  
1.96  
1.88  
1.86

1.27  
1.25  
1.23

S11Et

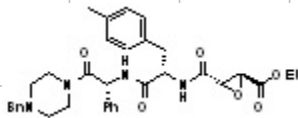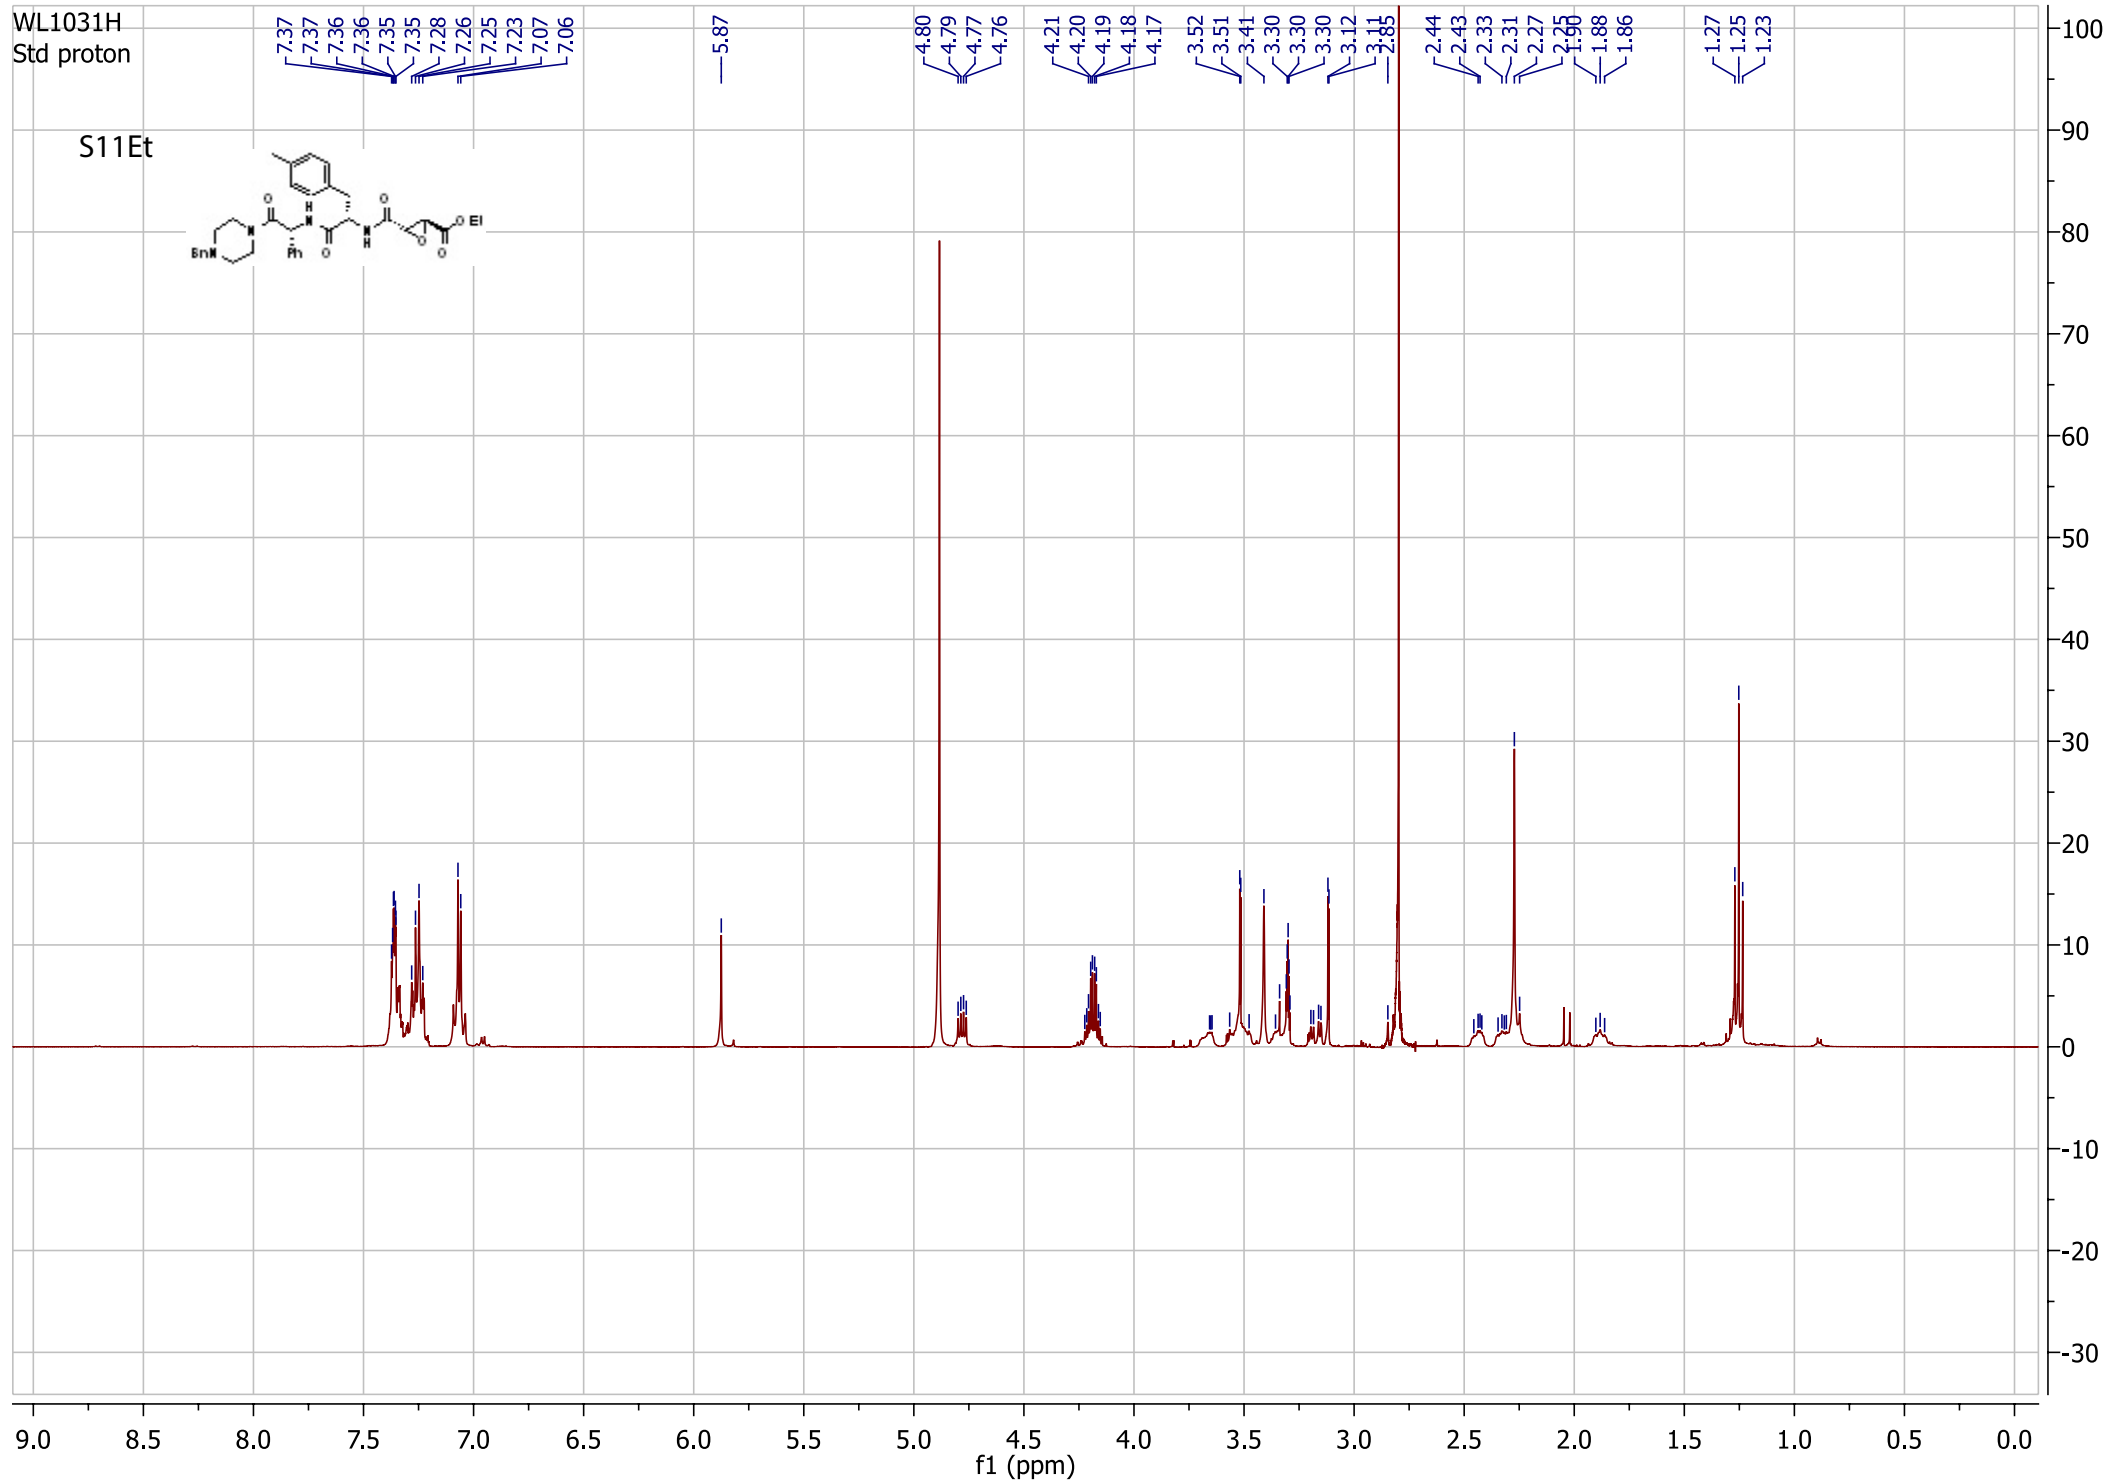

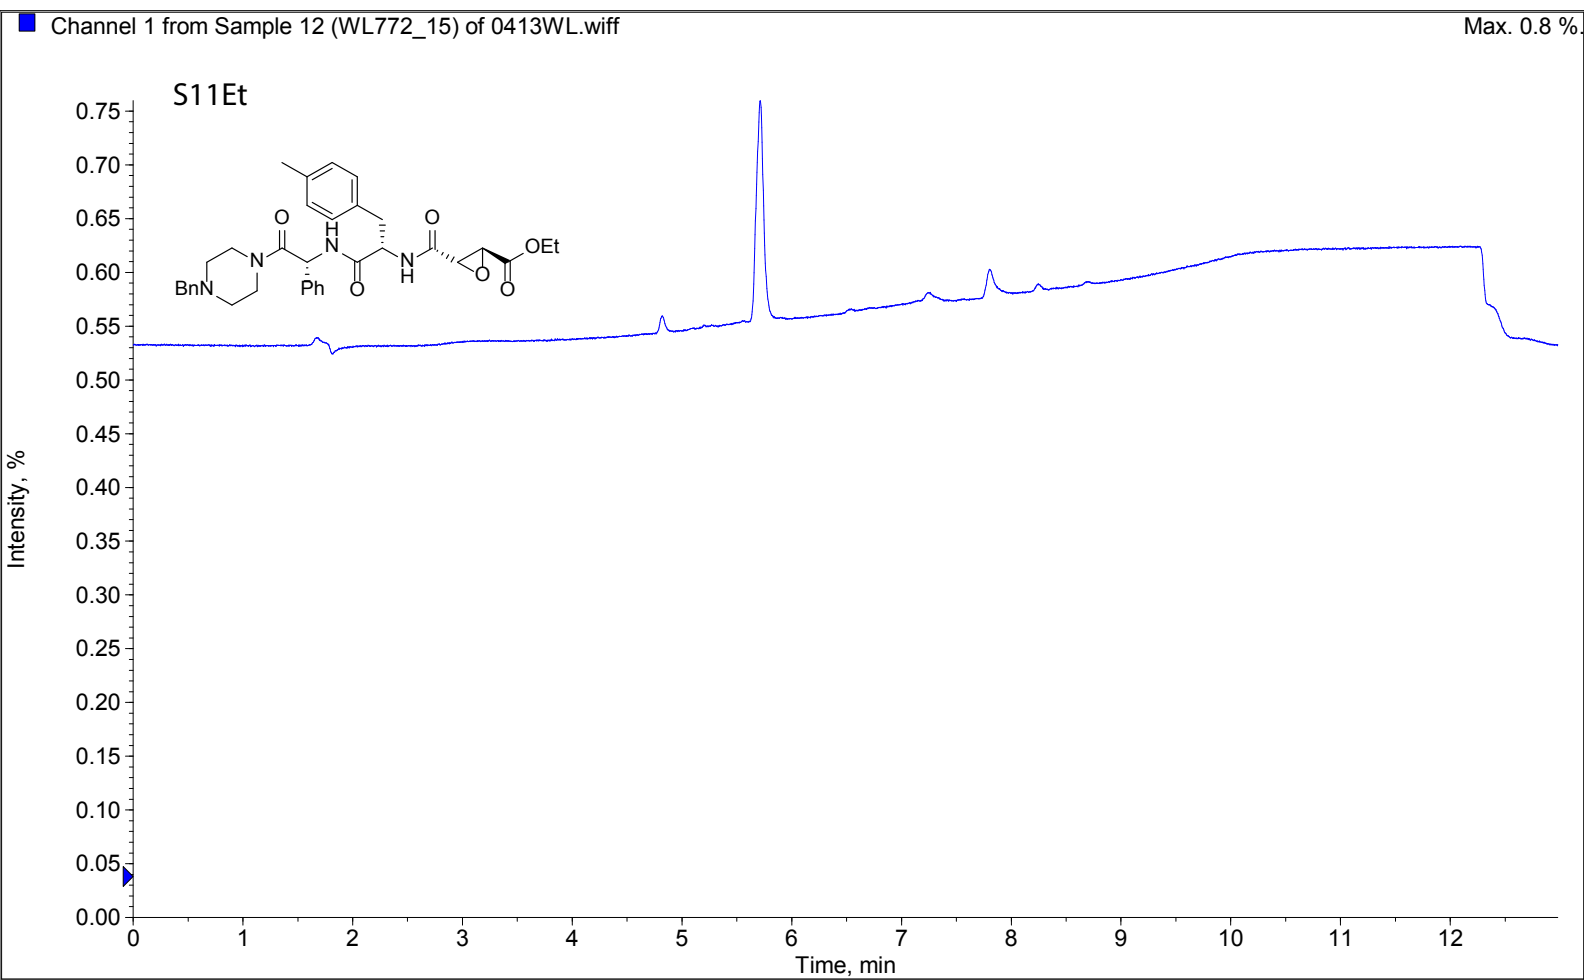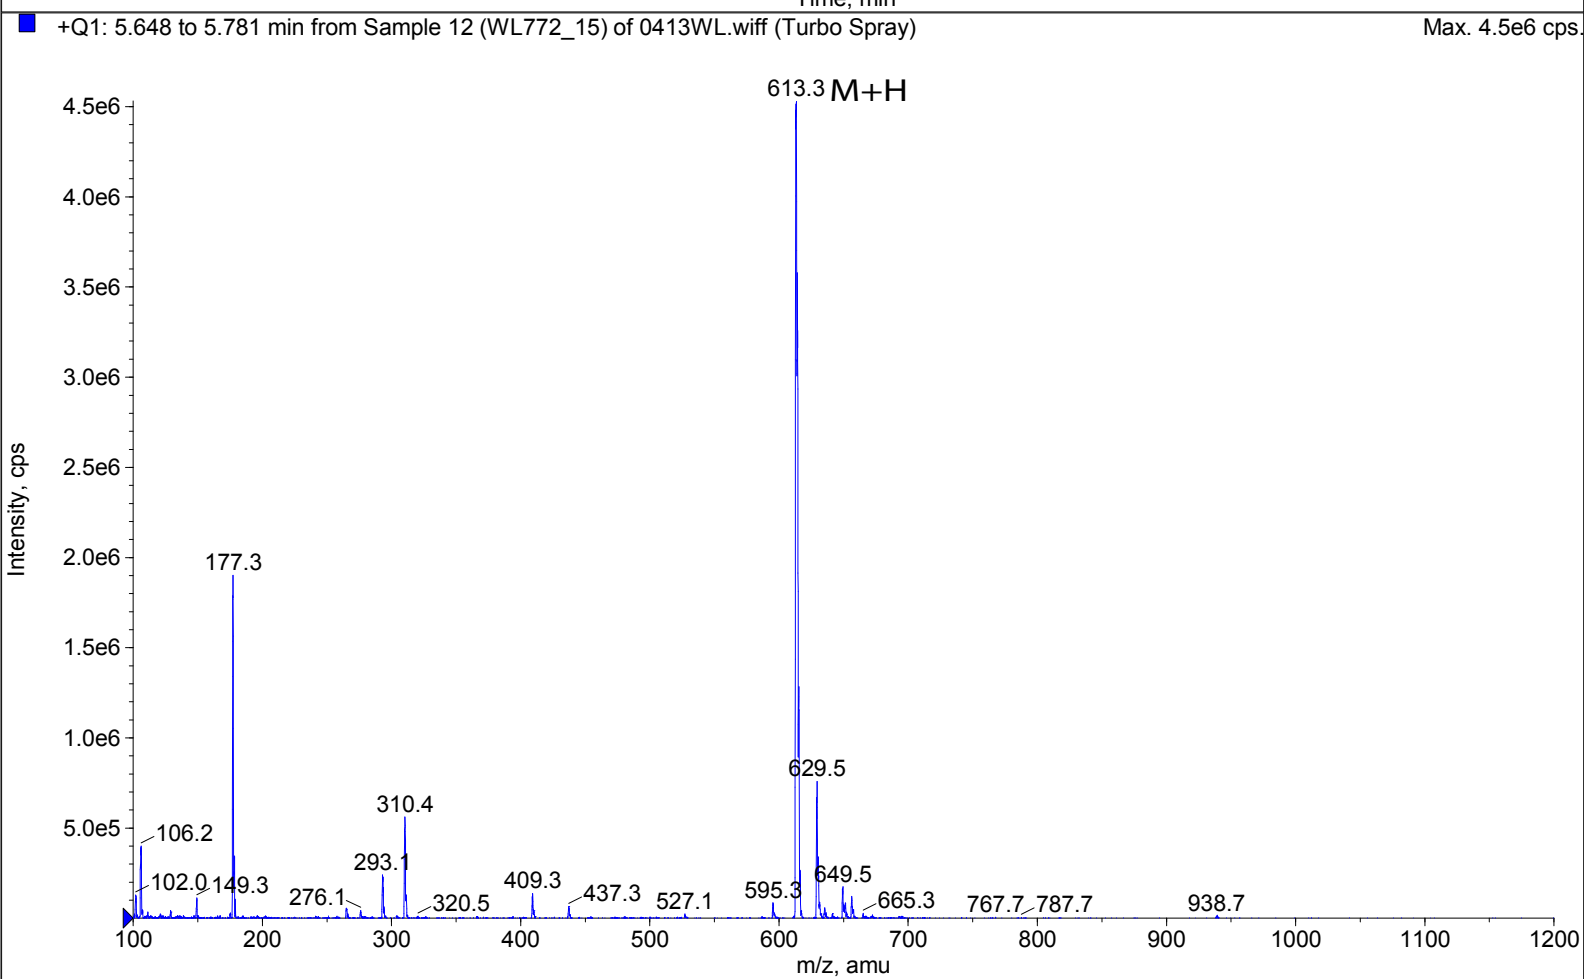

S12Et

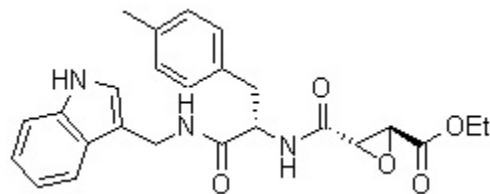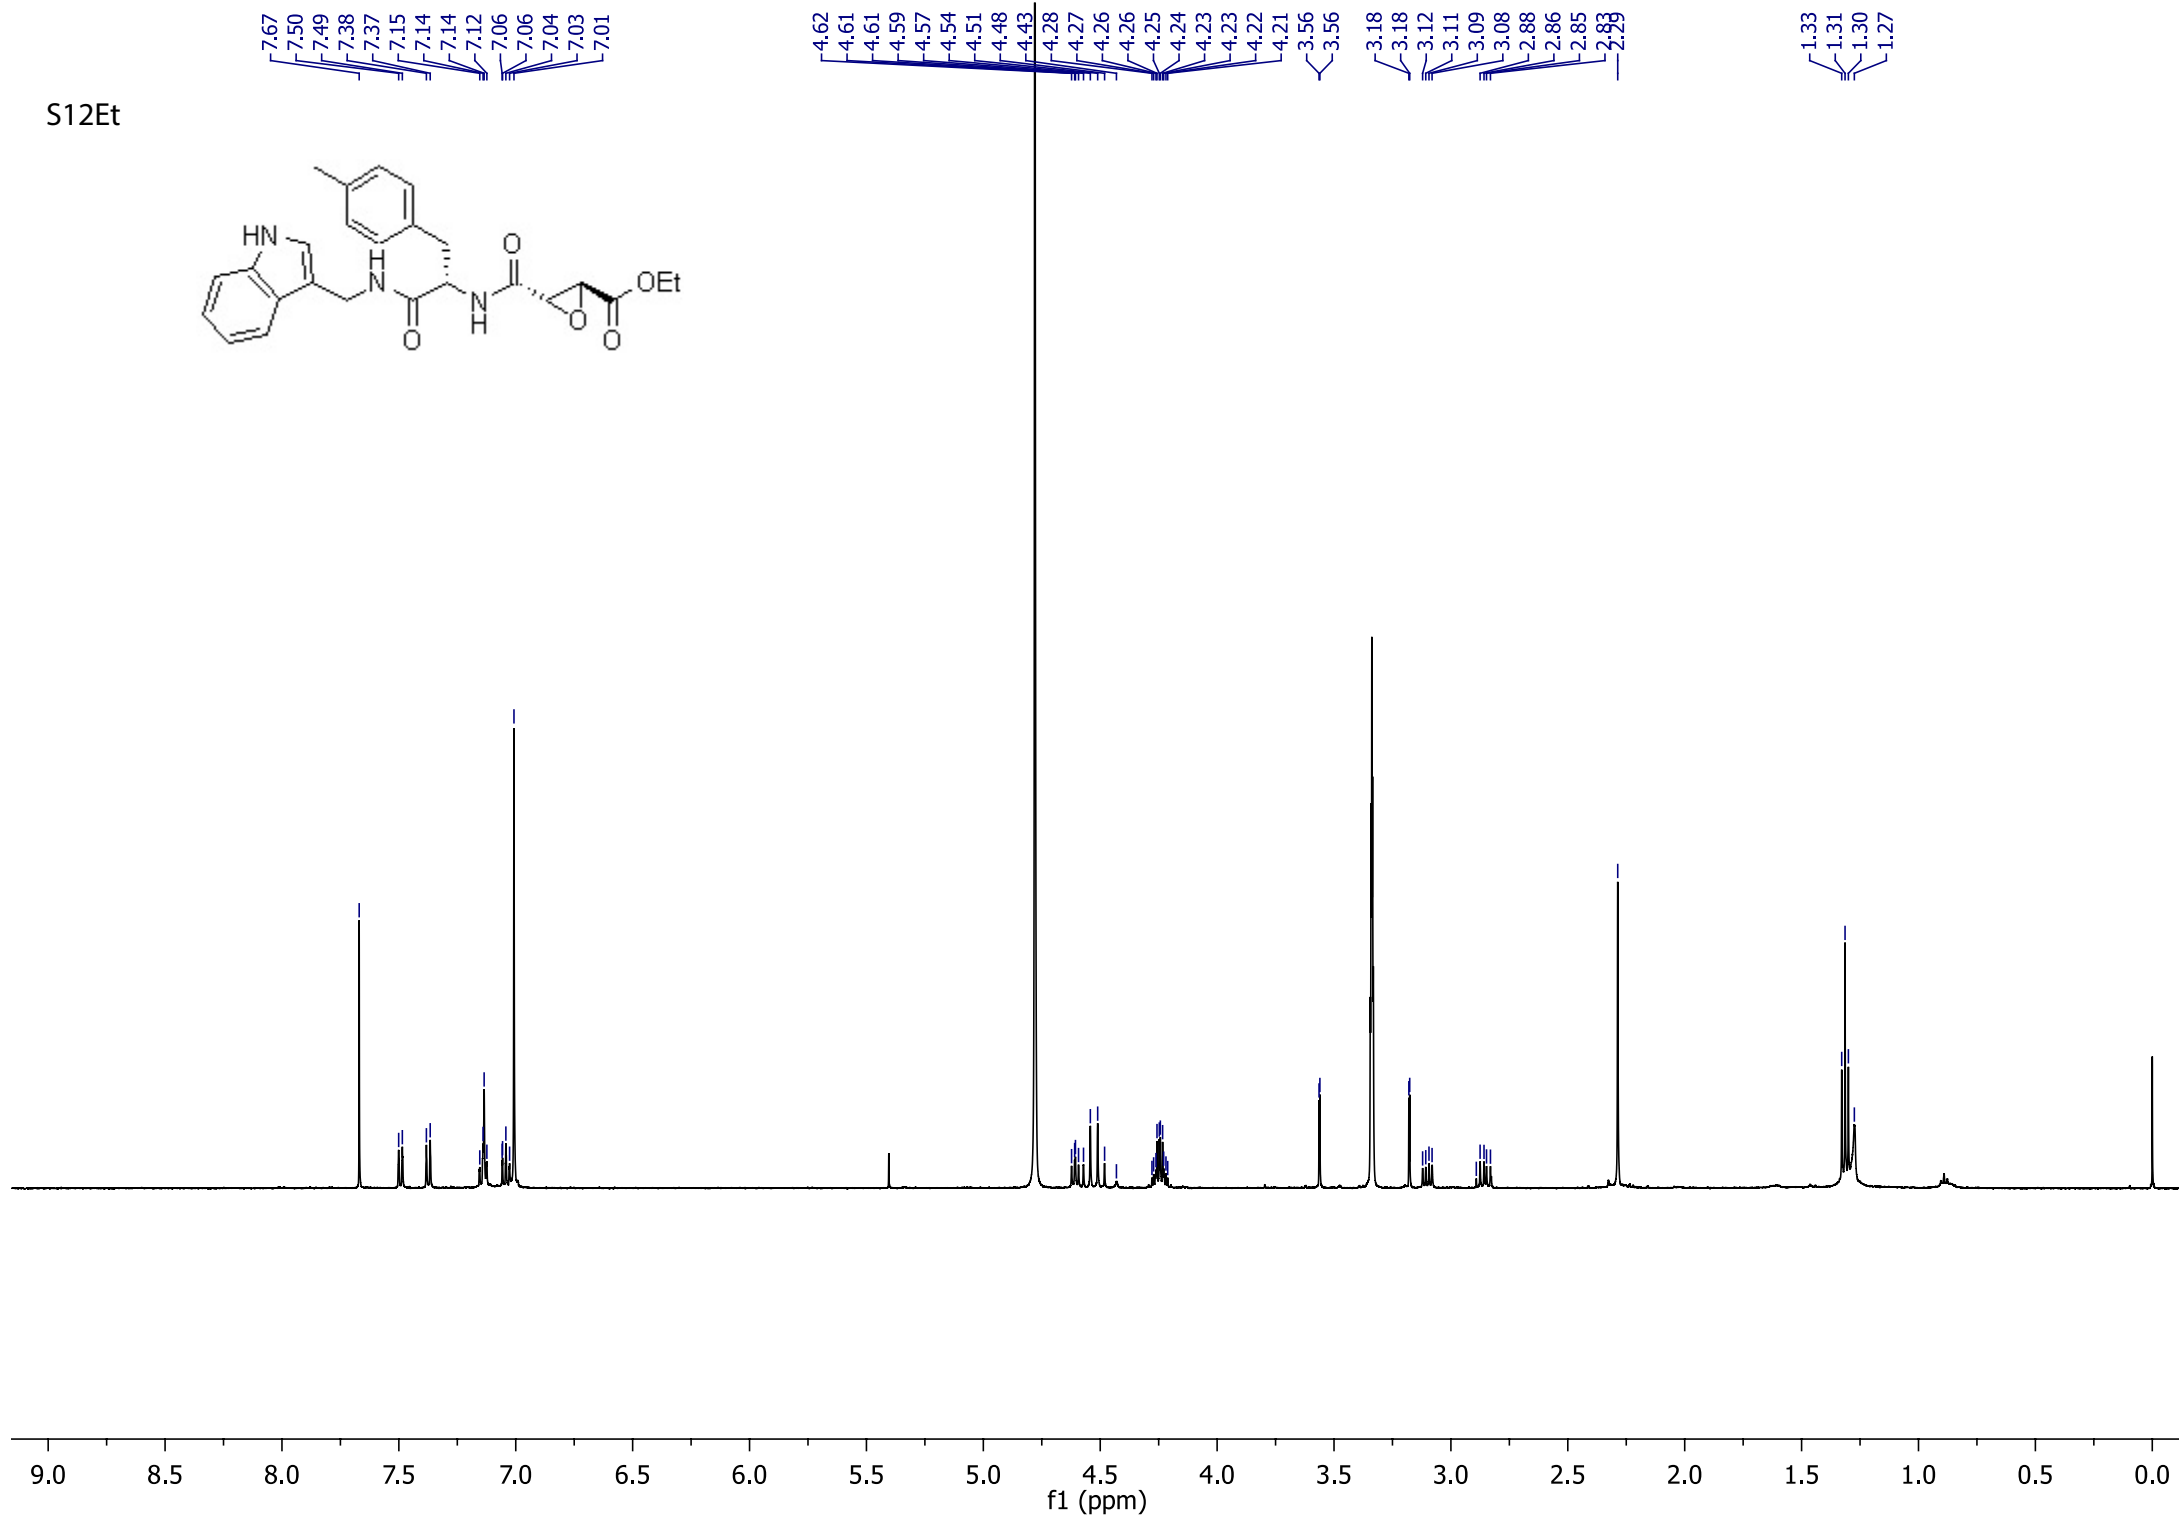

Channel 1 from Sample 43 (WL773) of 0113WL.wiff

Max. 5.1 %

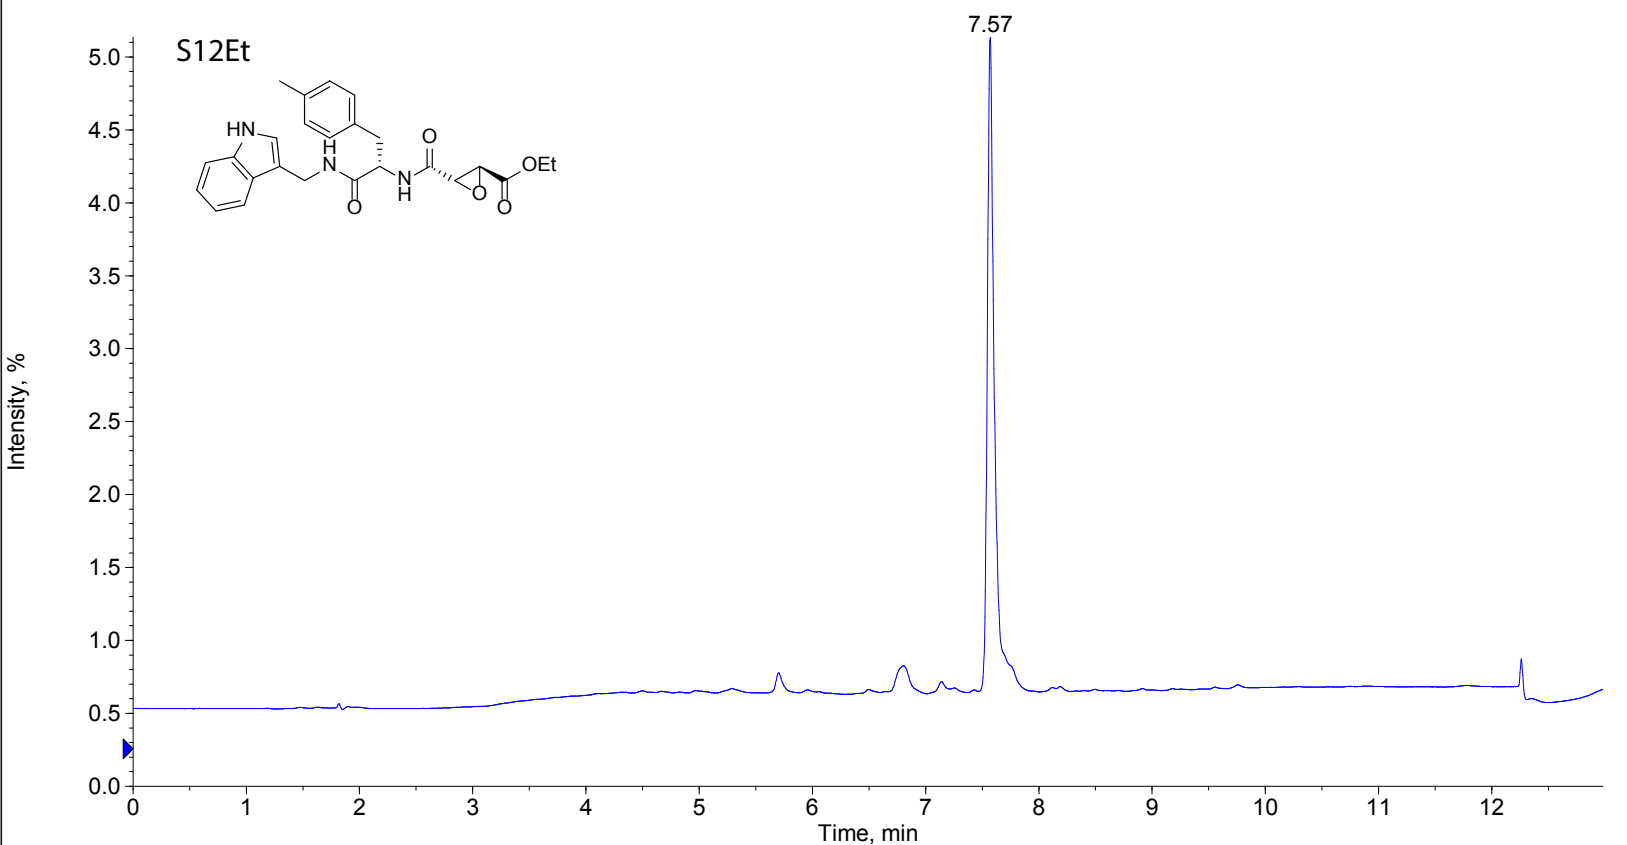

+Q1: 7.552 min from Sample 43 (WL773) of 0113WL.wiff (Turbo Spray)

Max. 7.9e5 cps

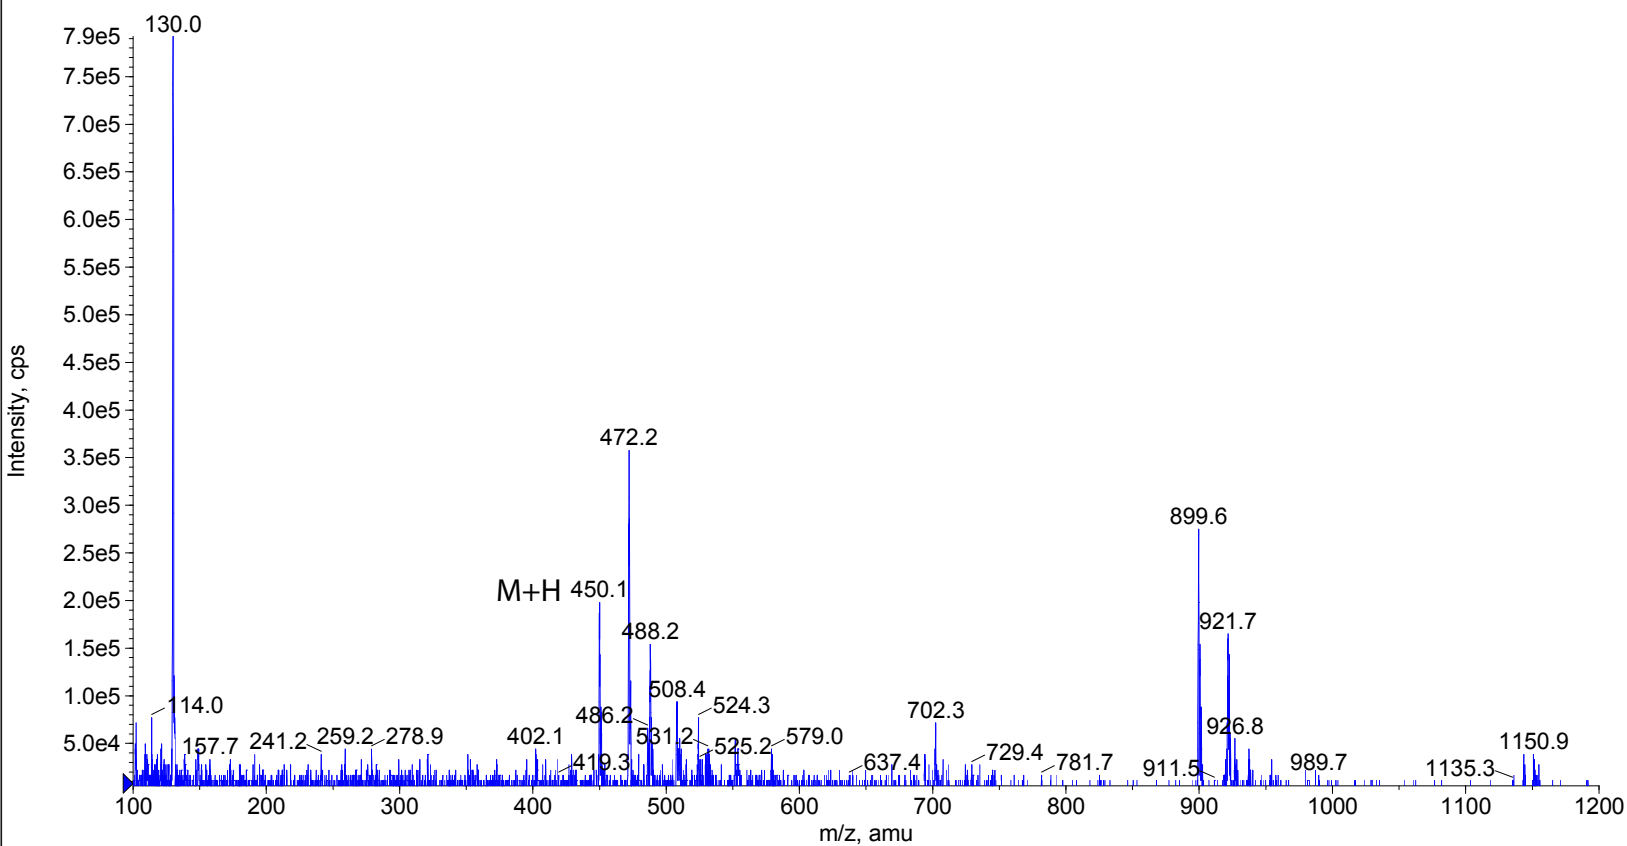

S13Et

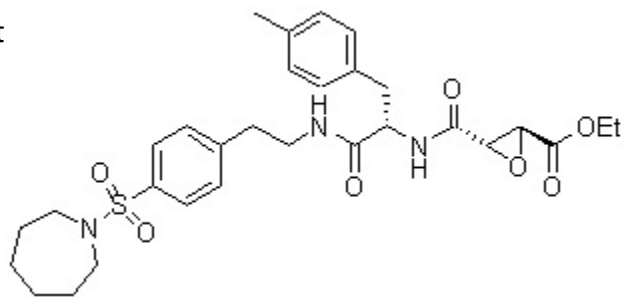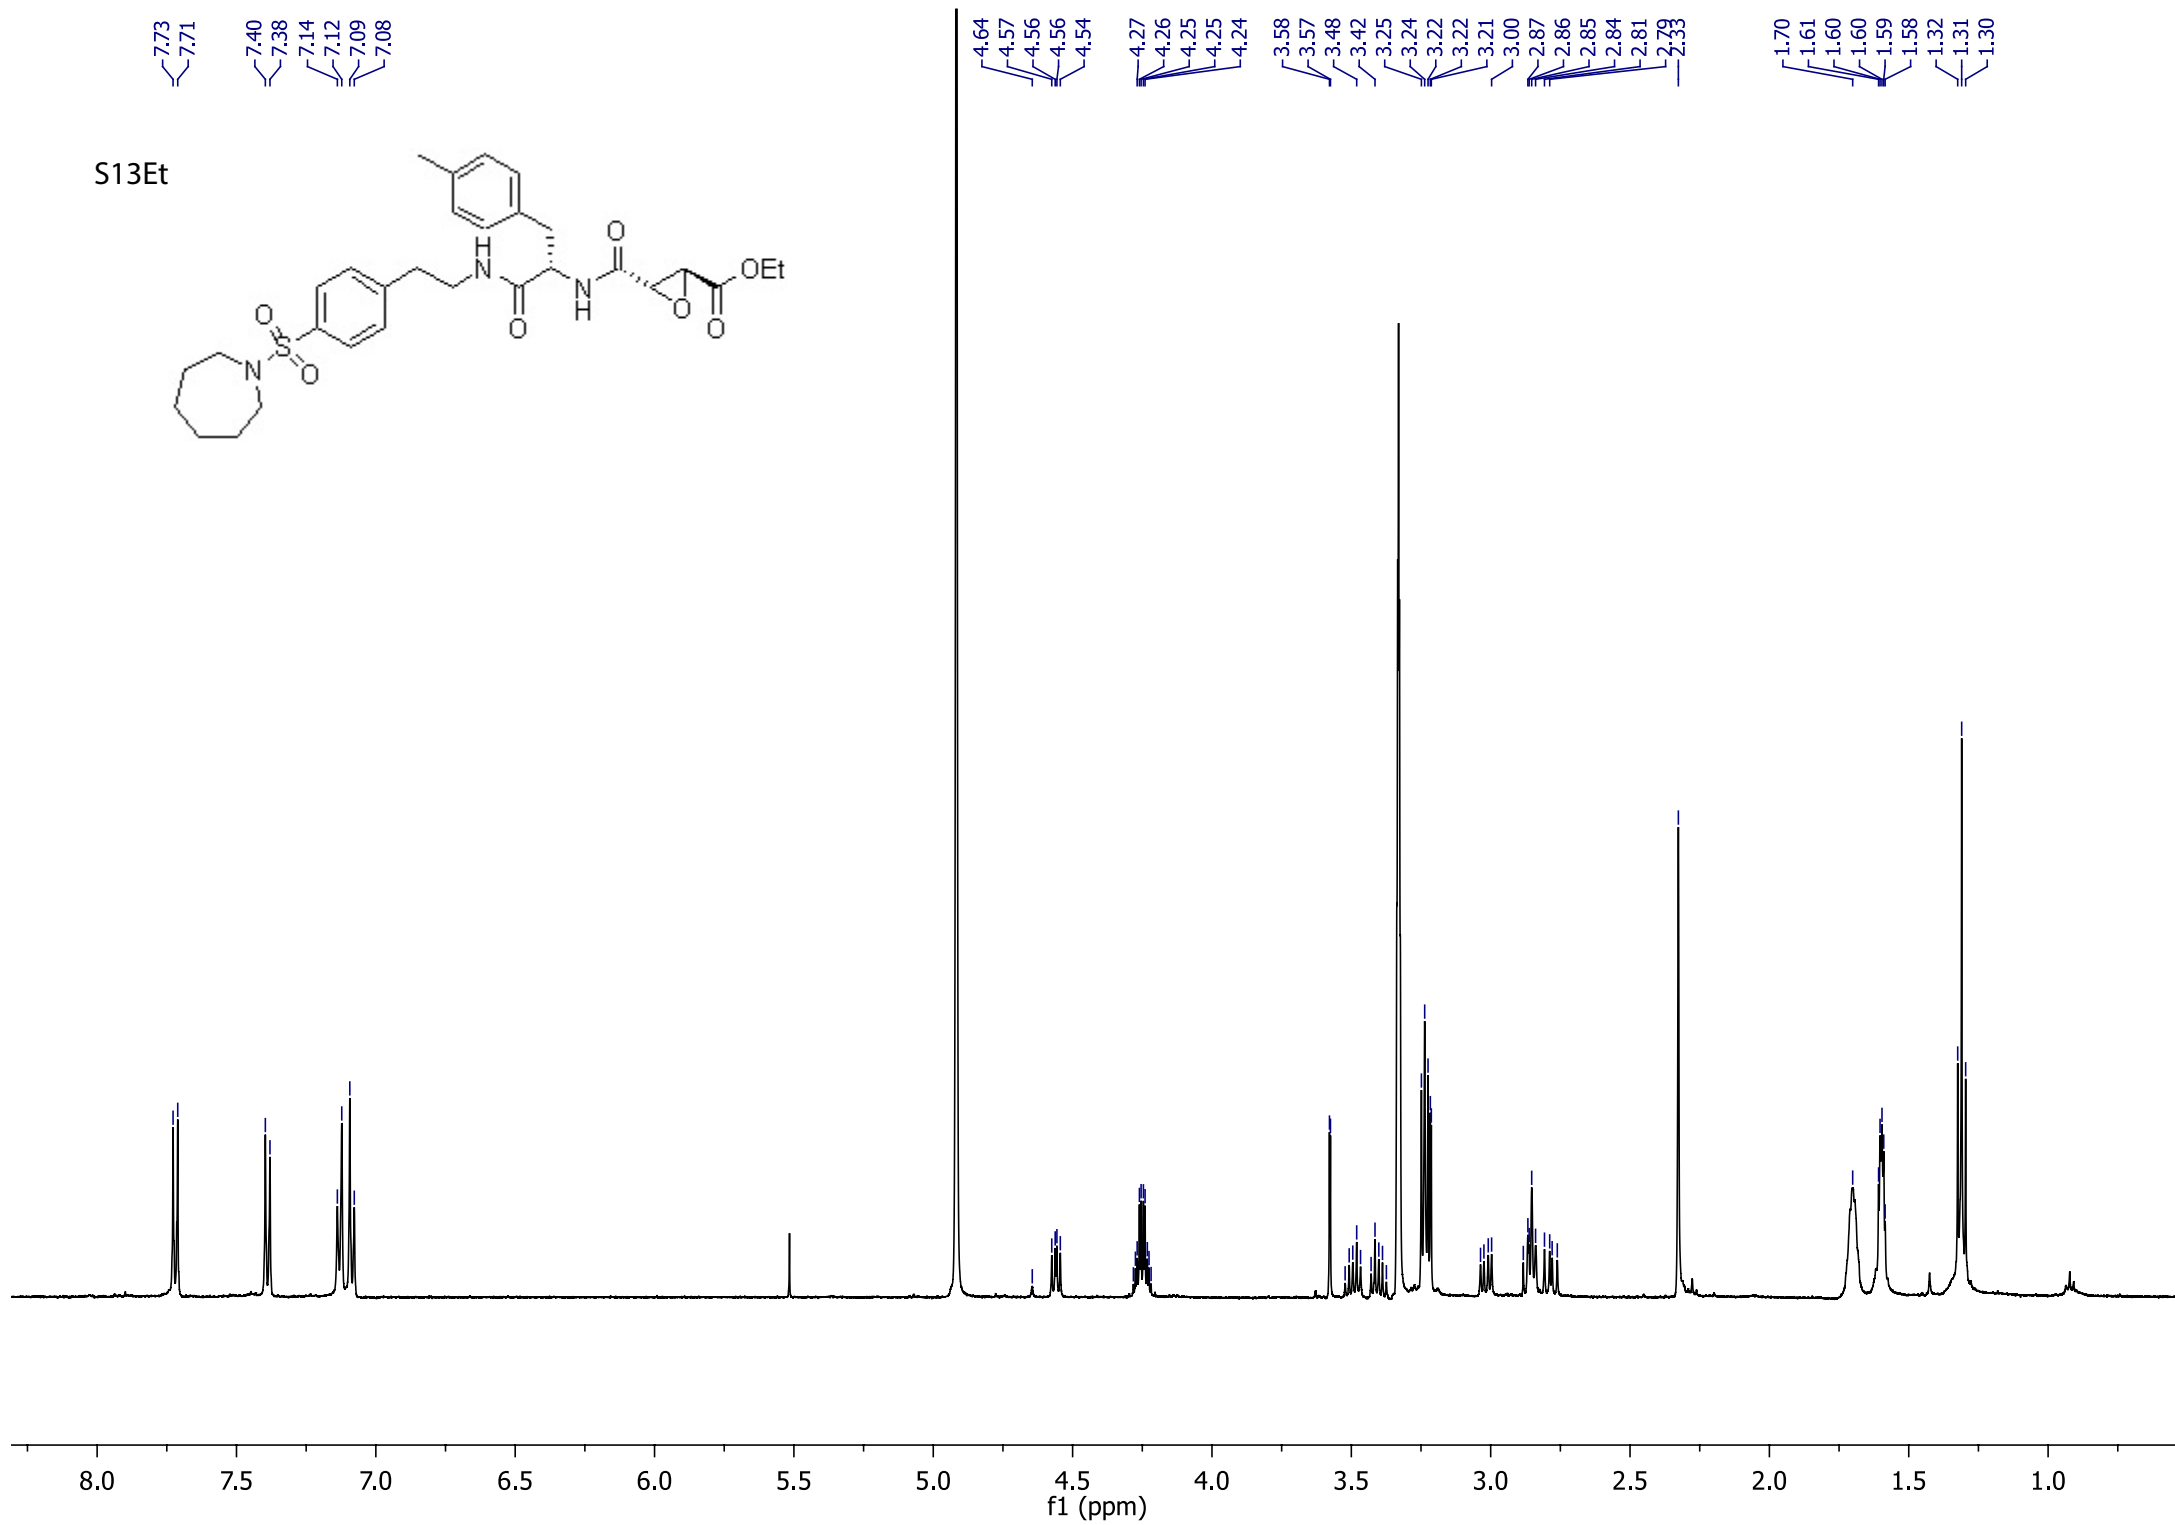

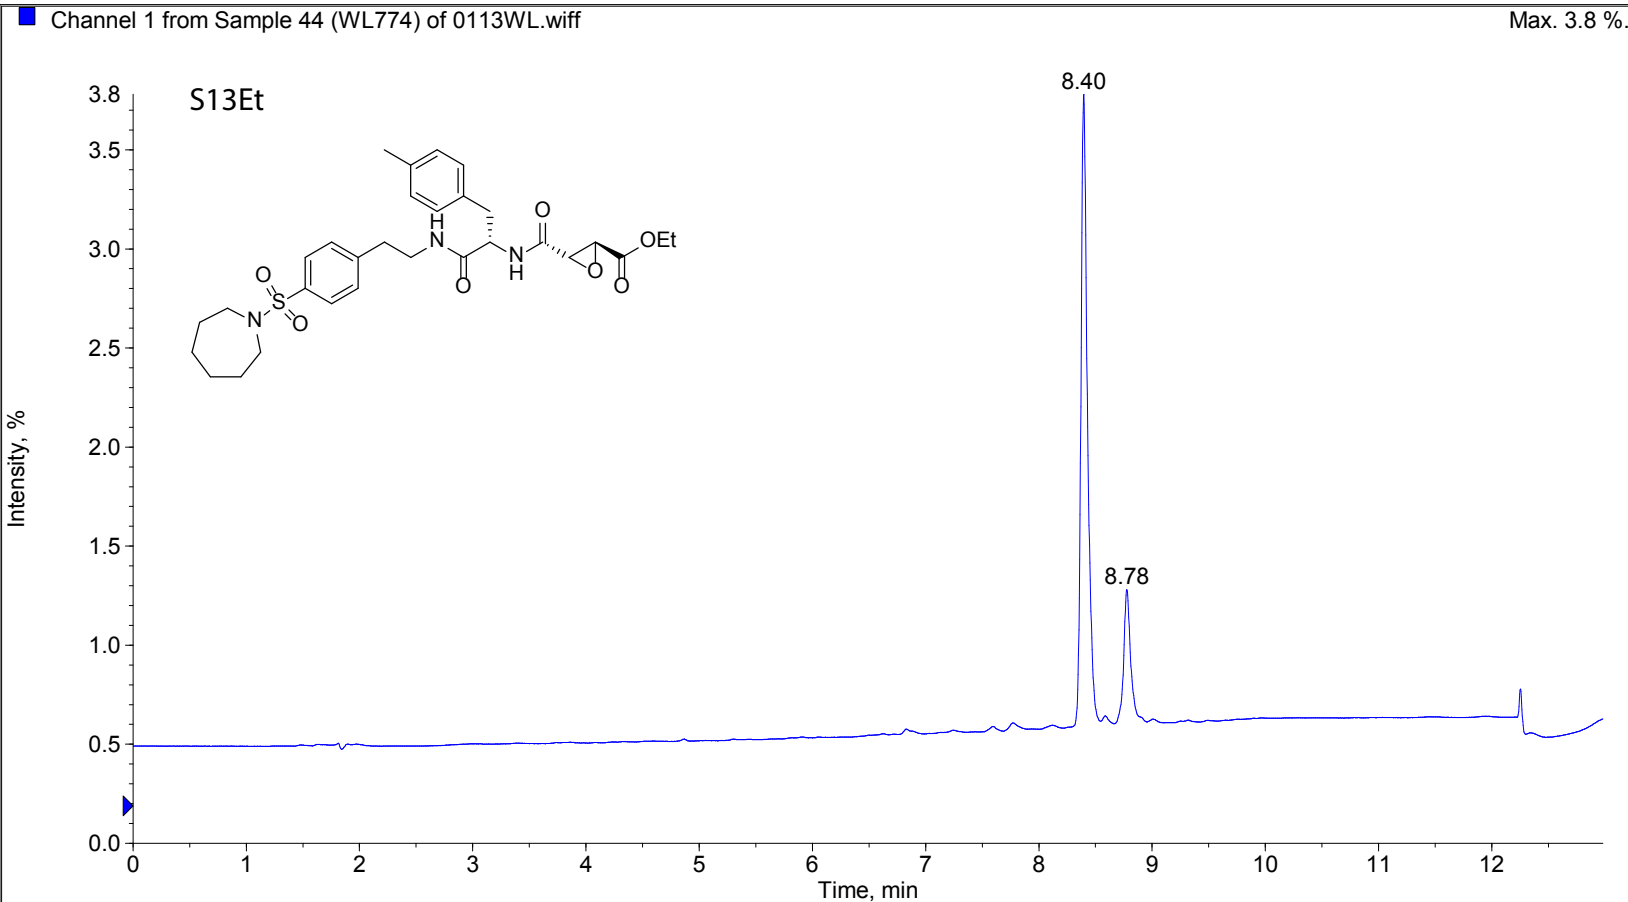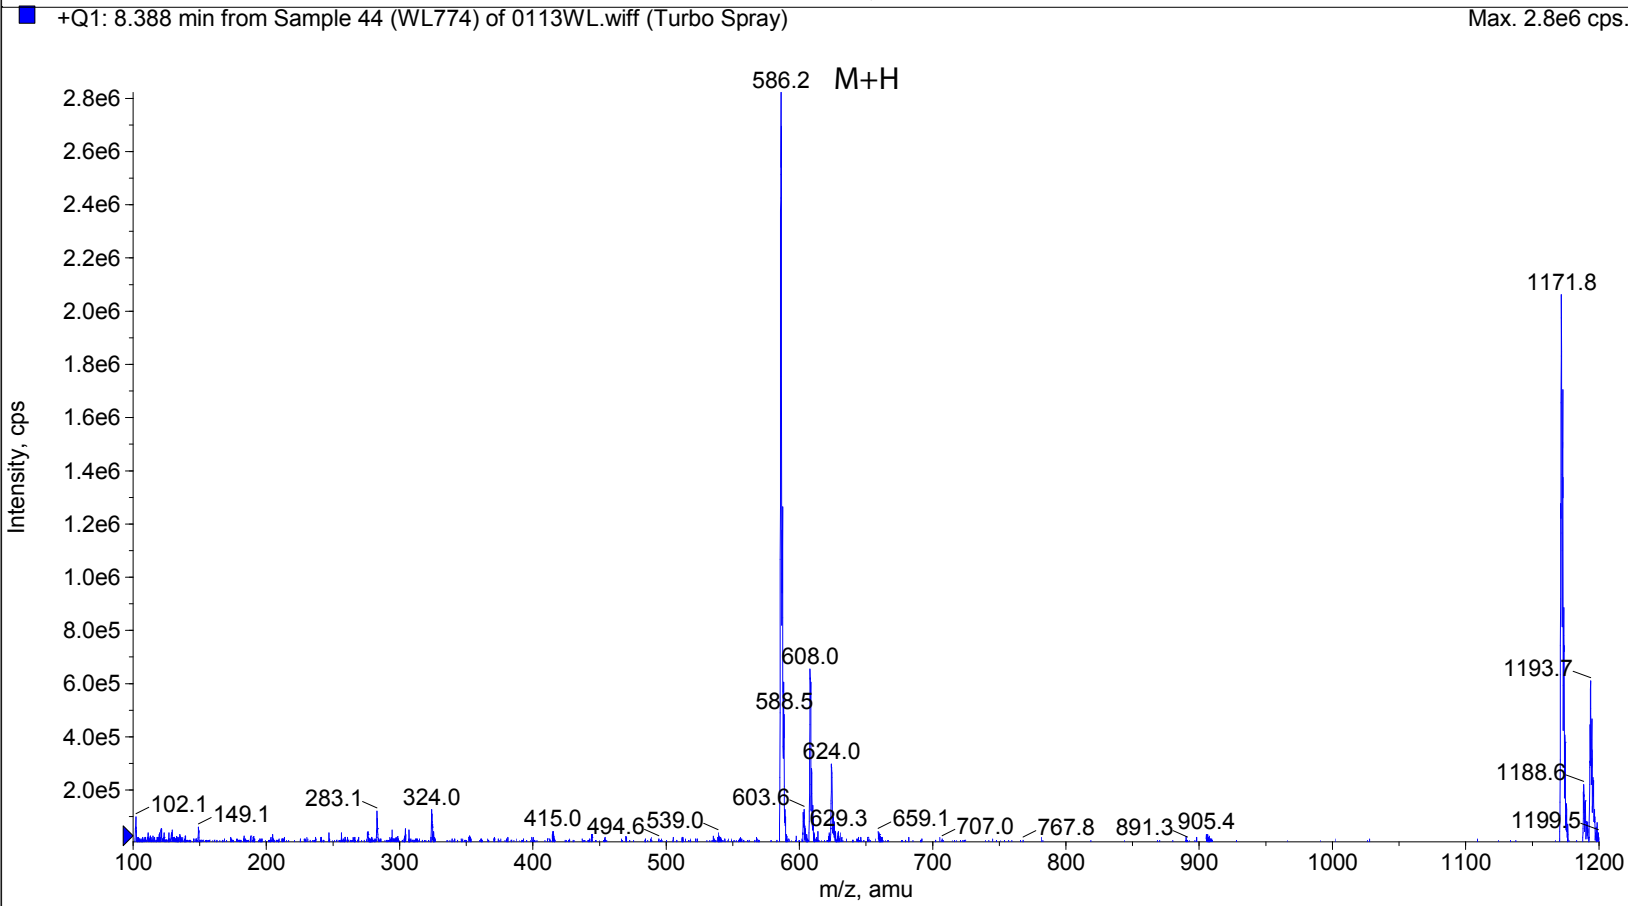





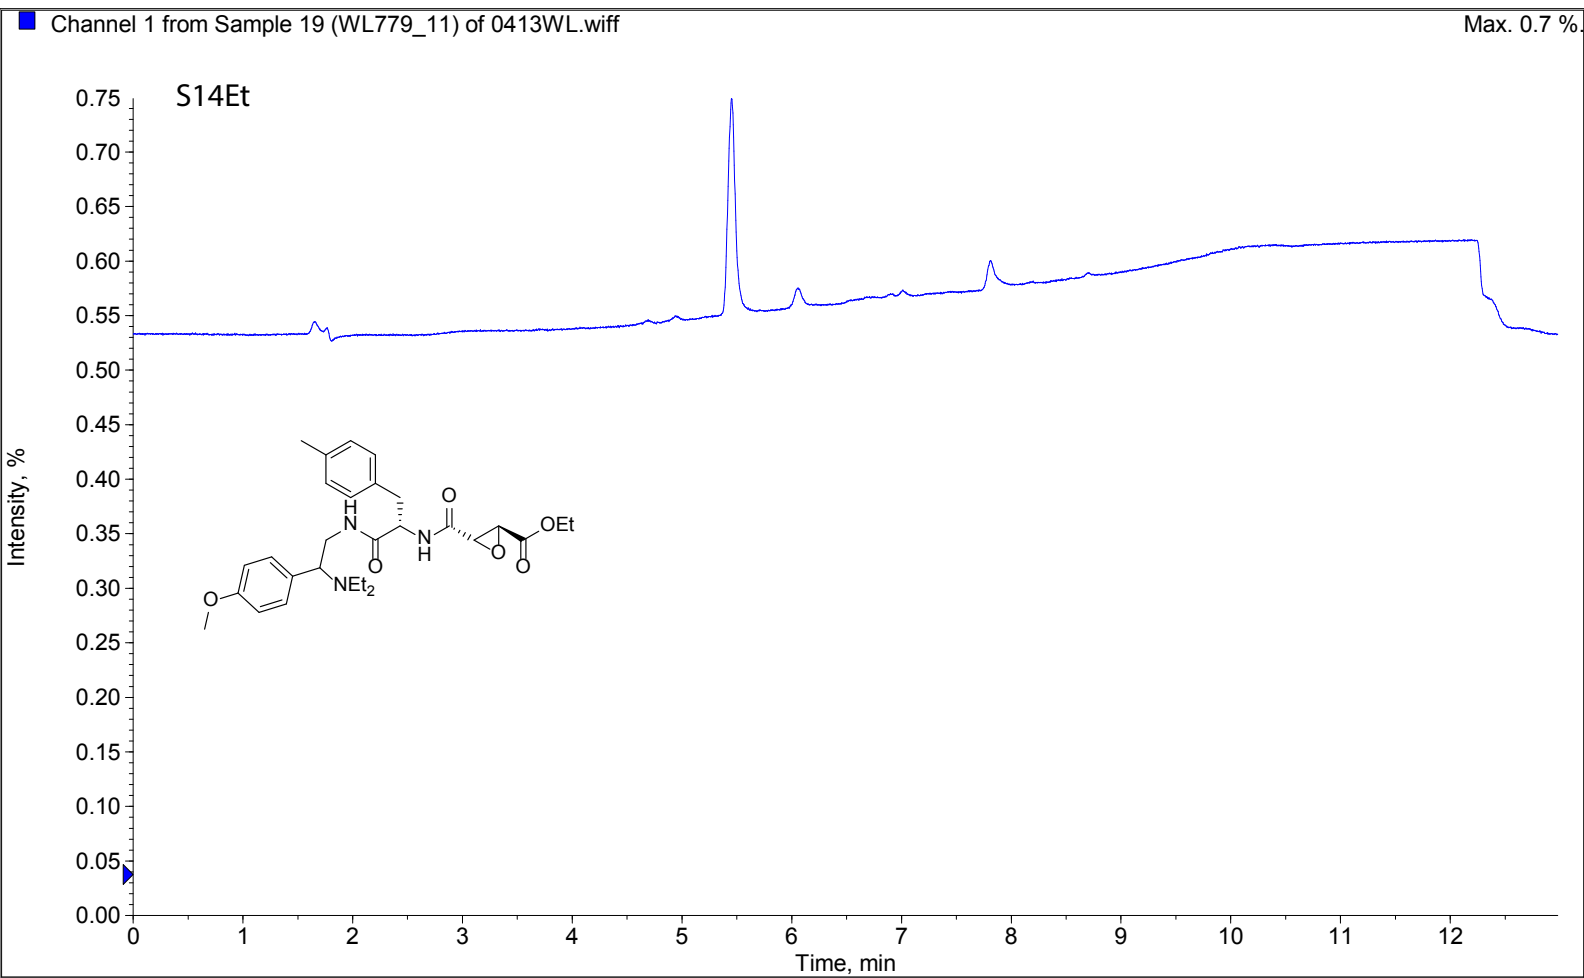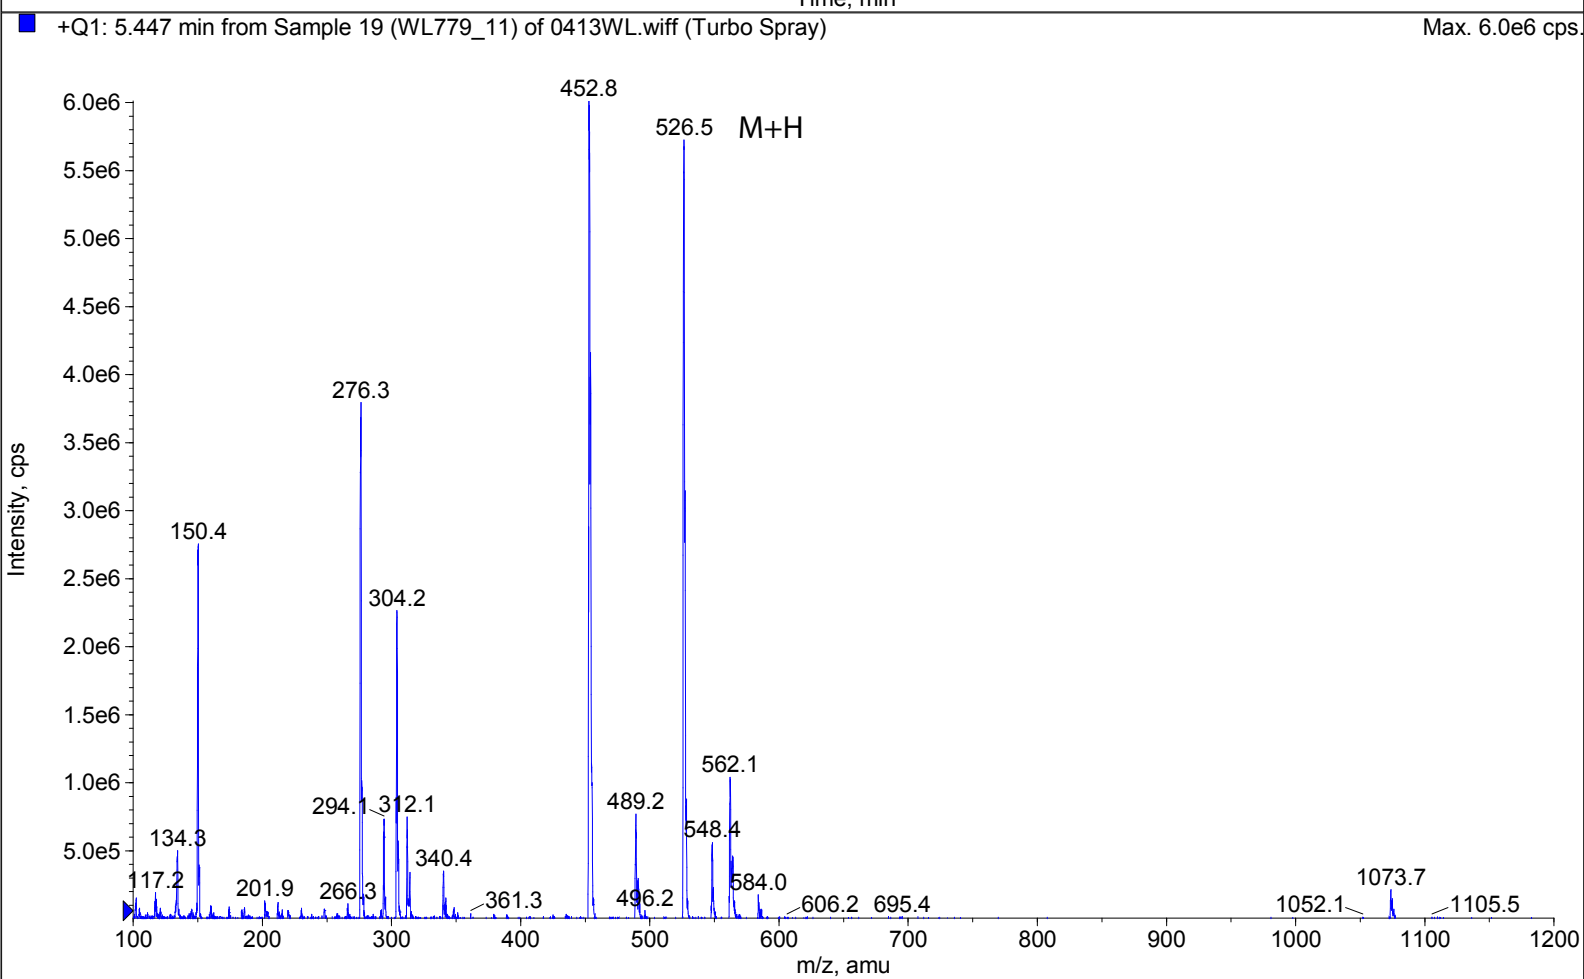

S15Et

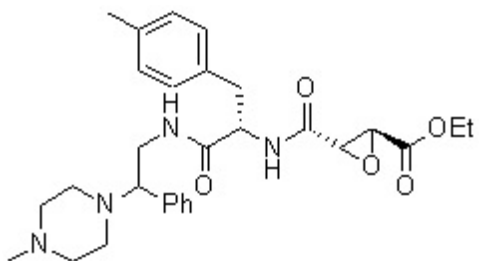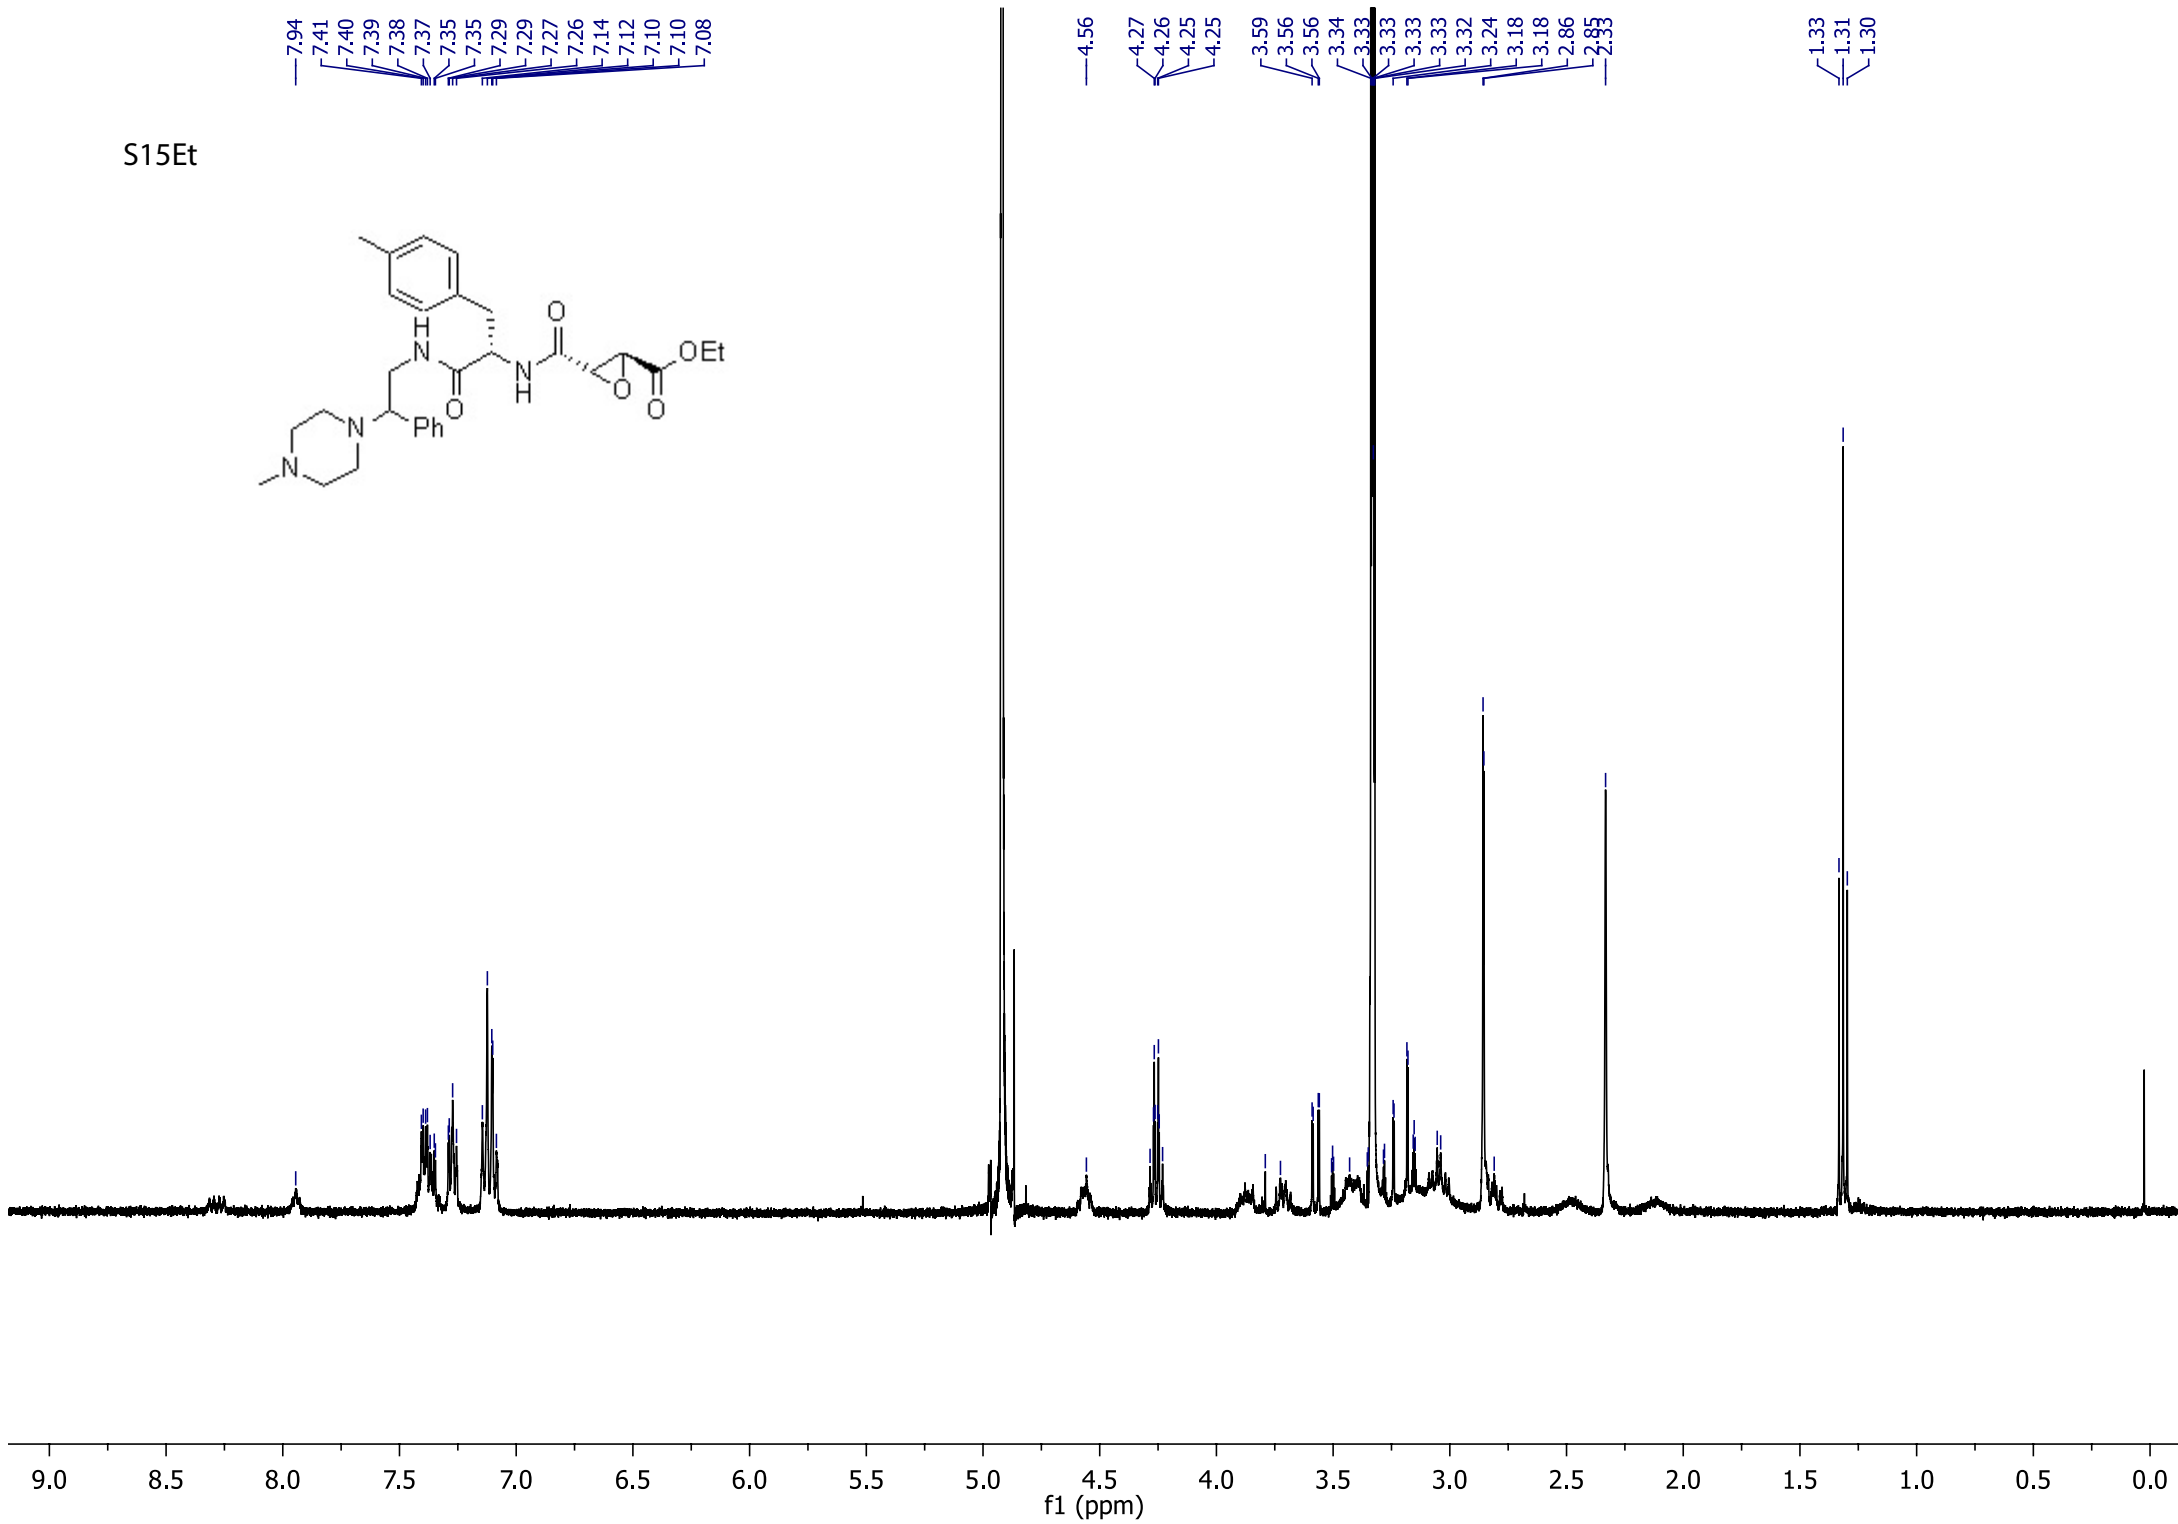

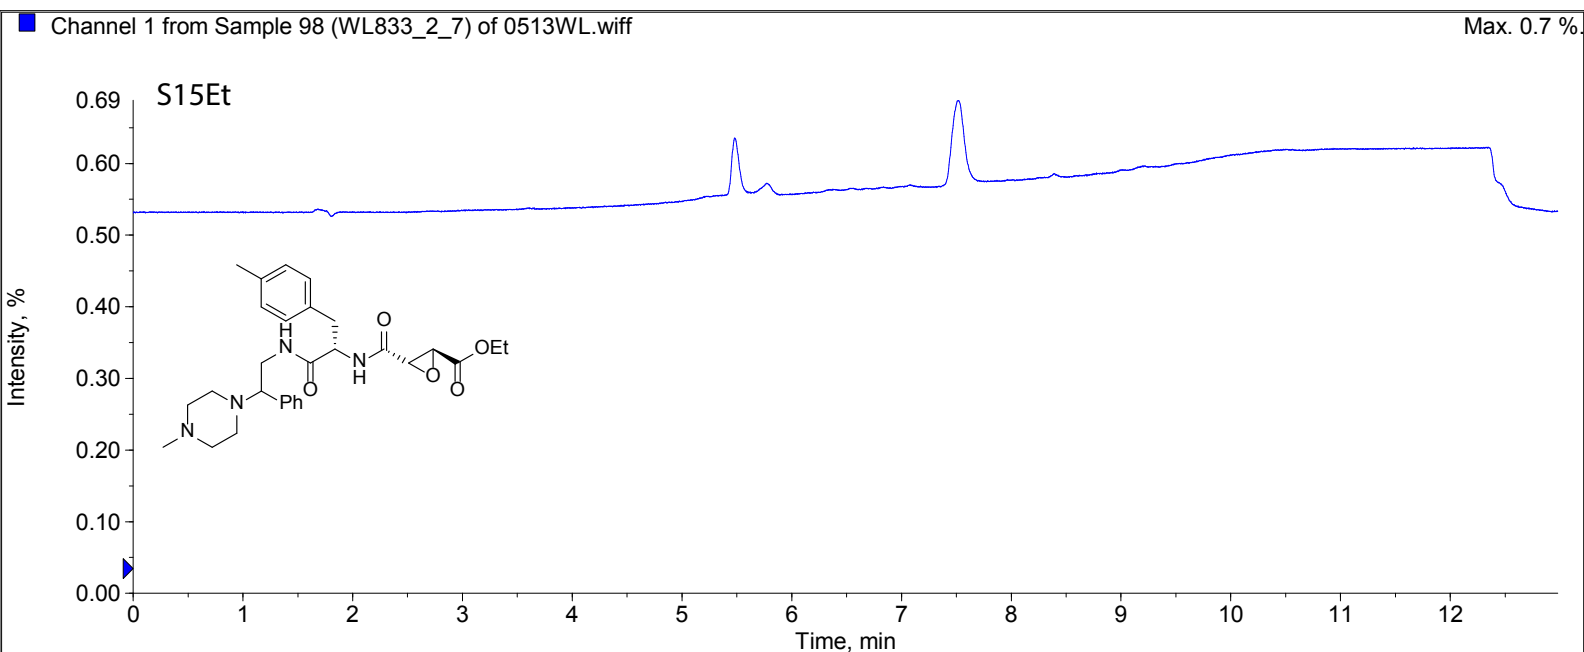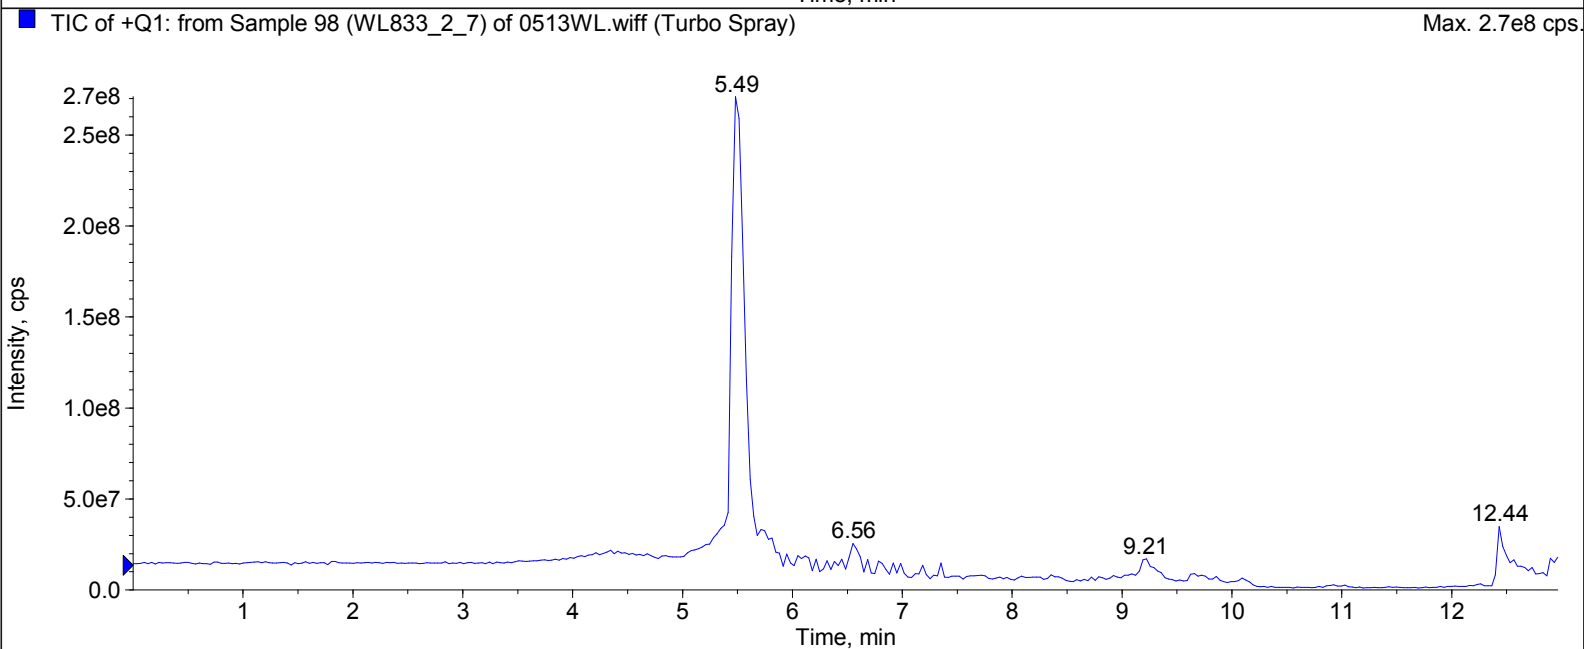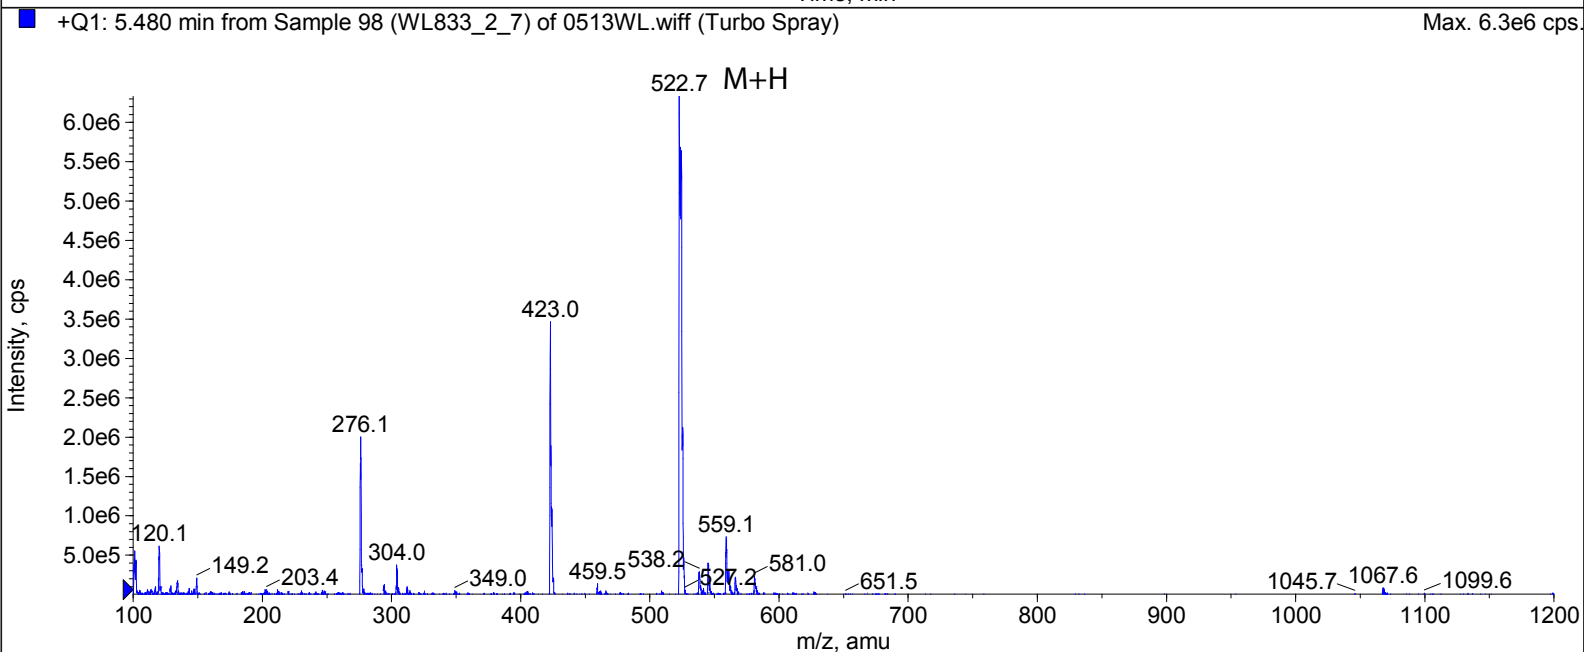

S16Et

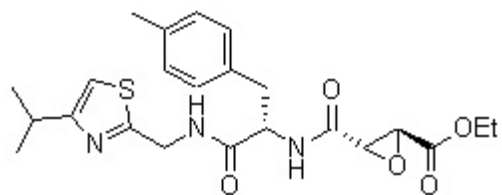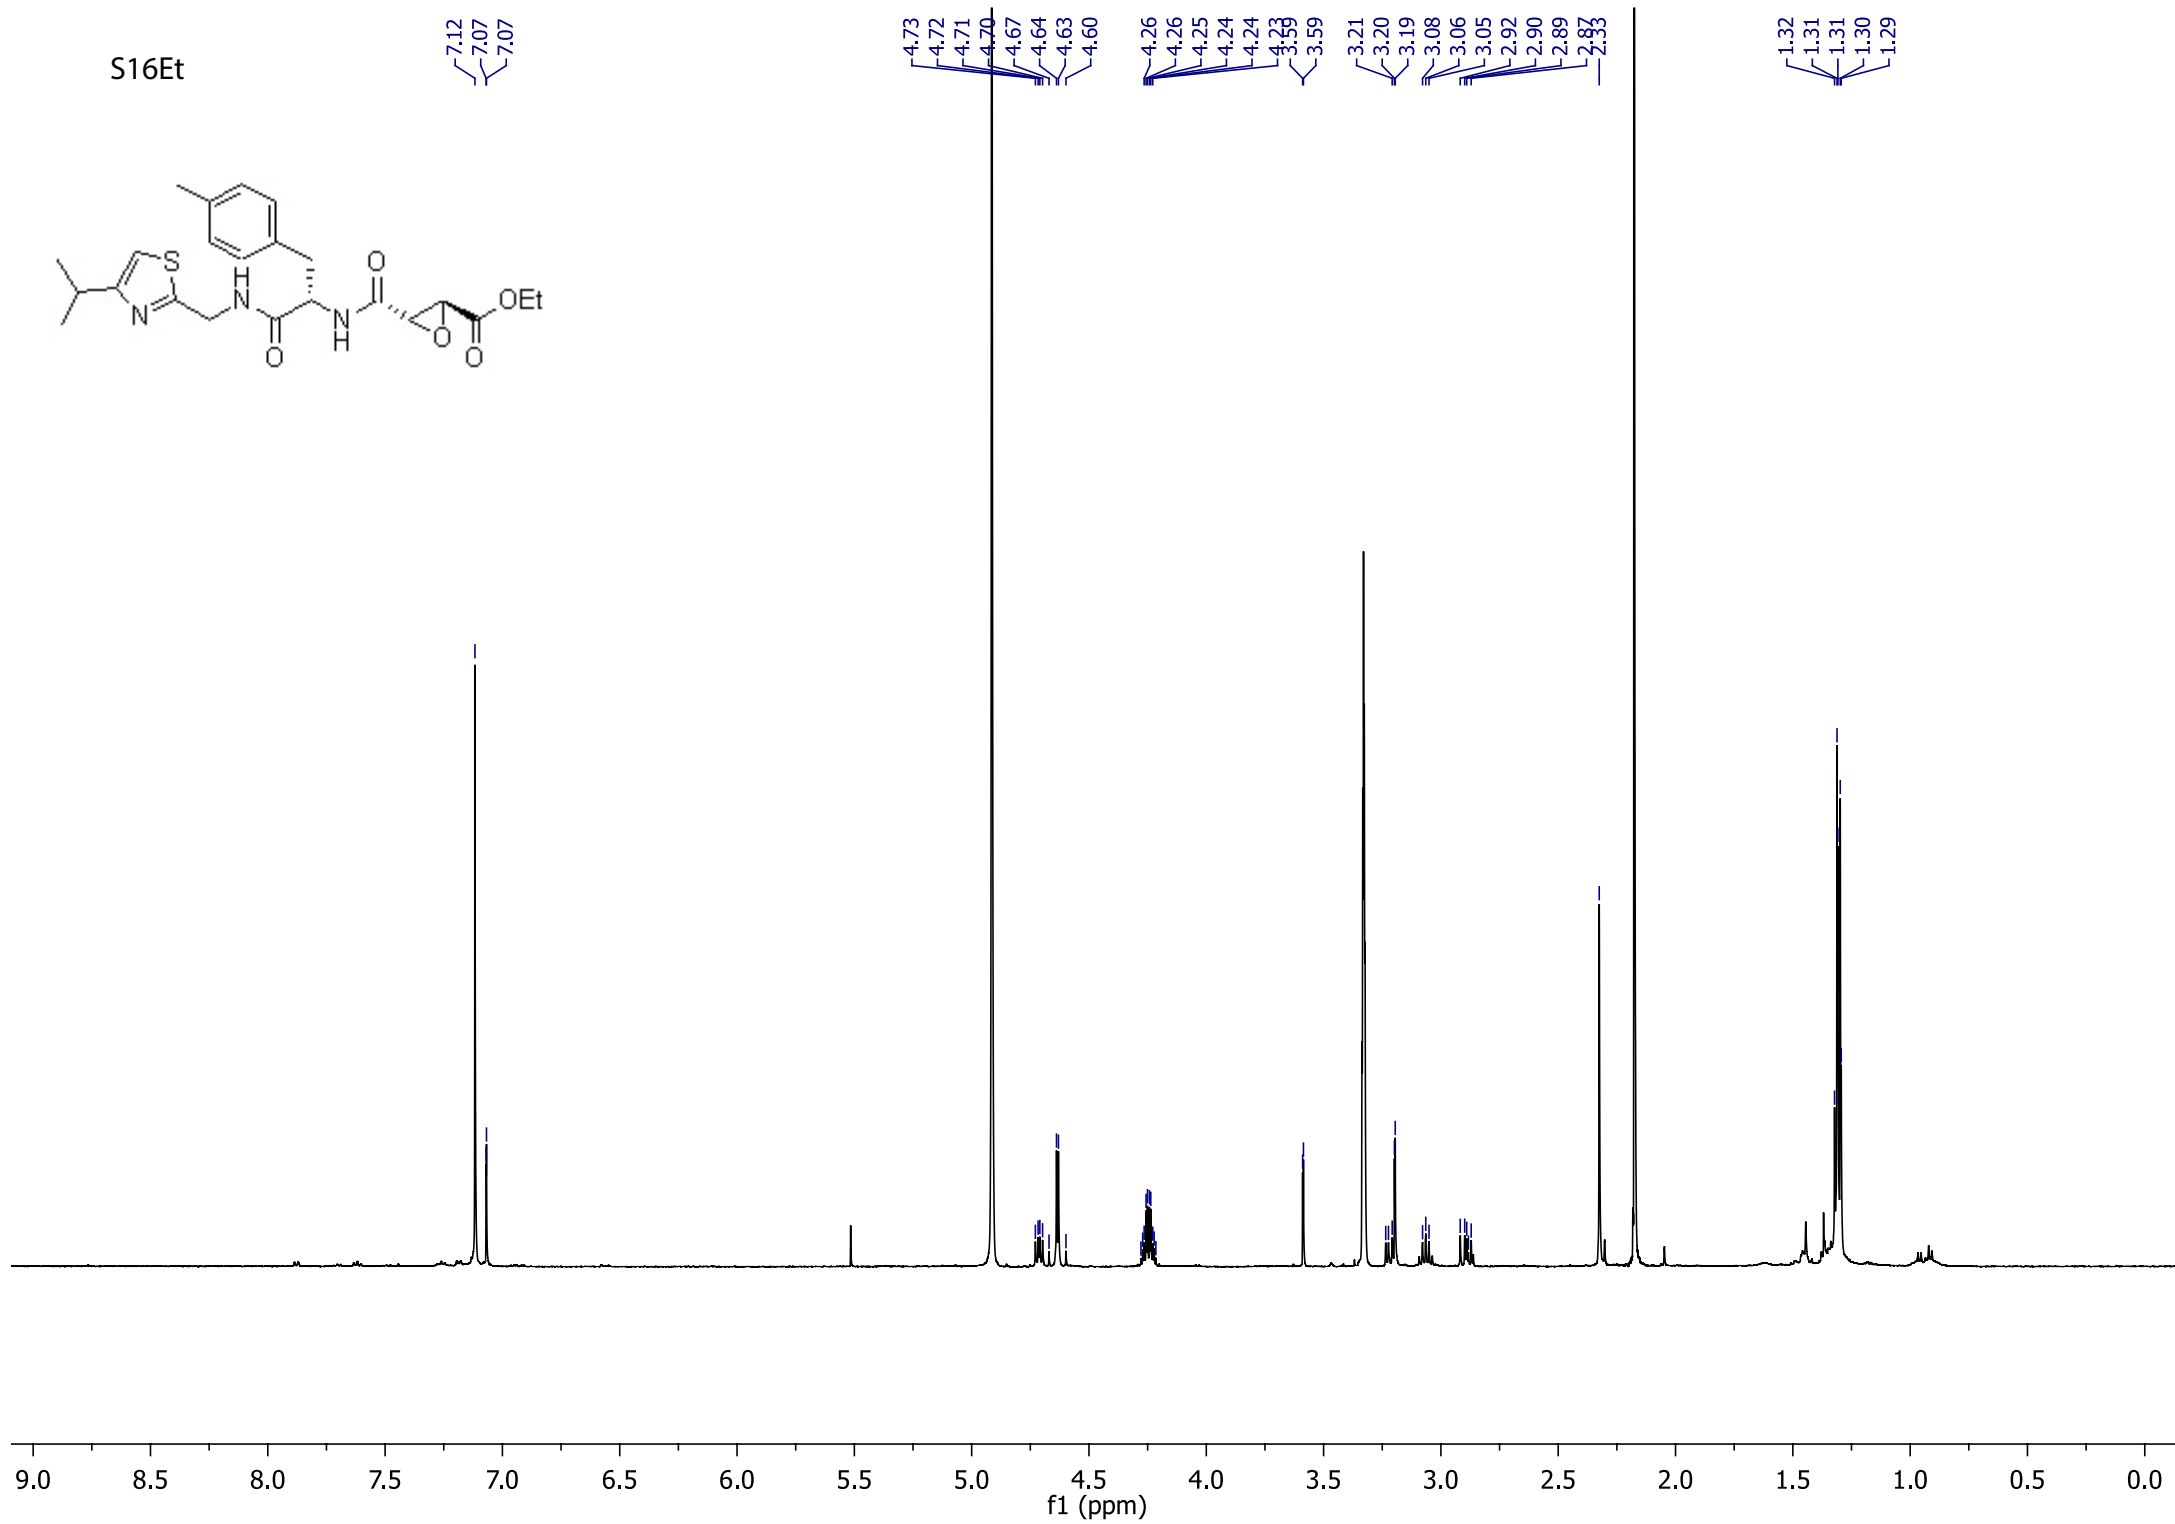

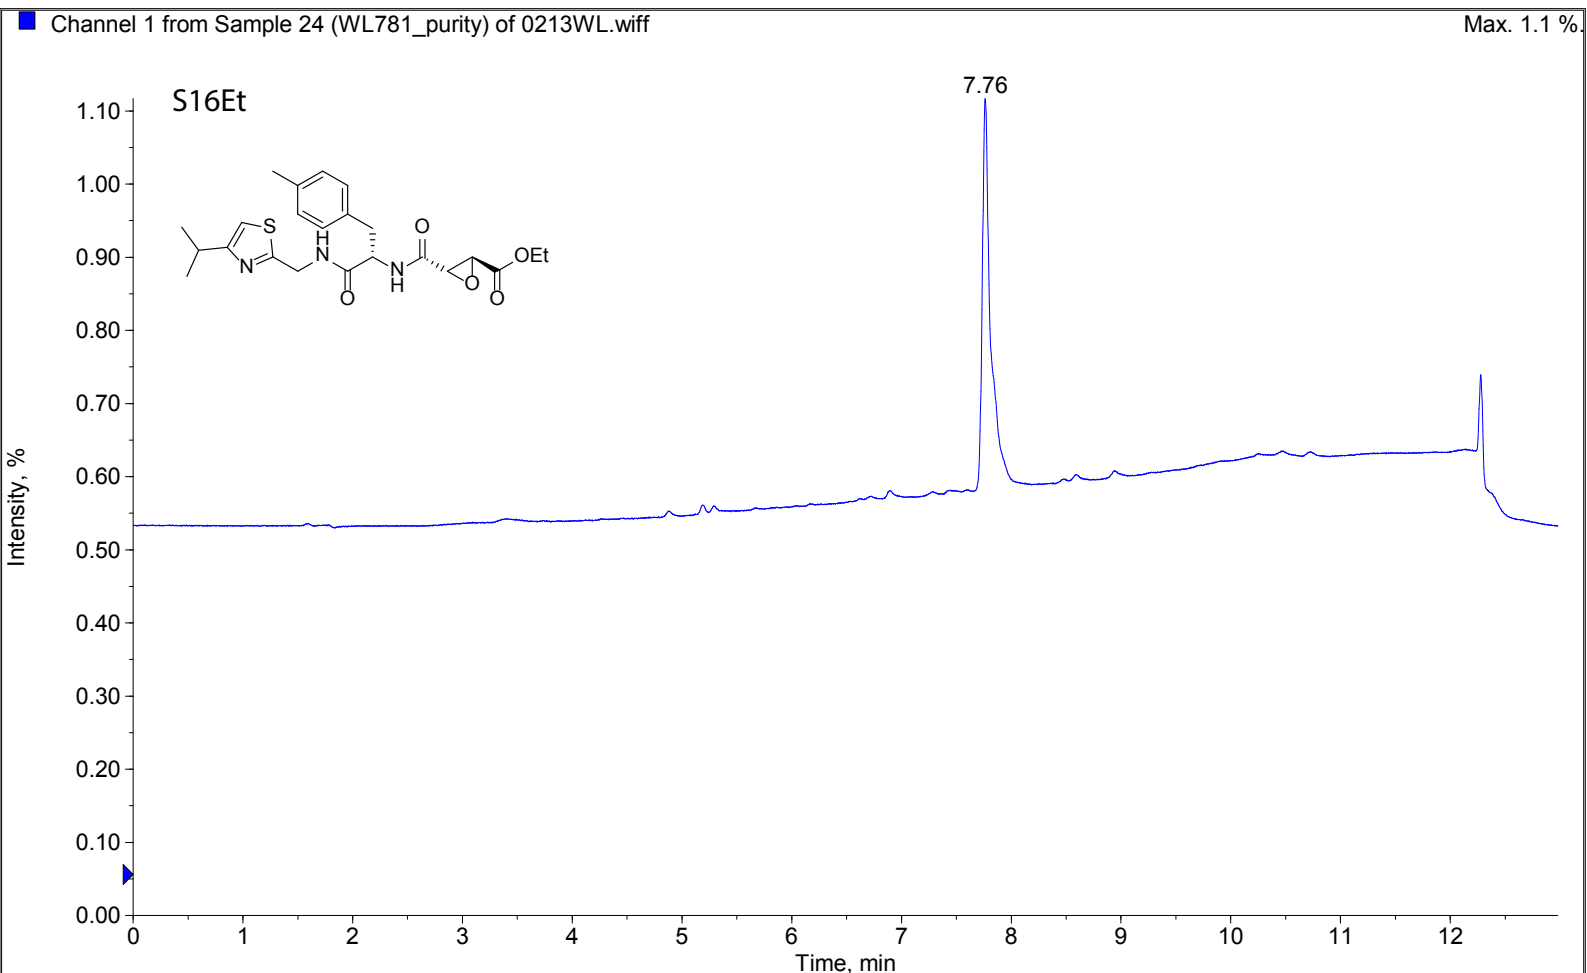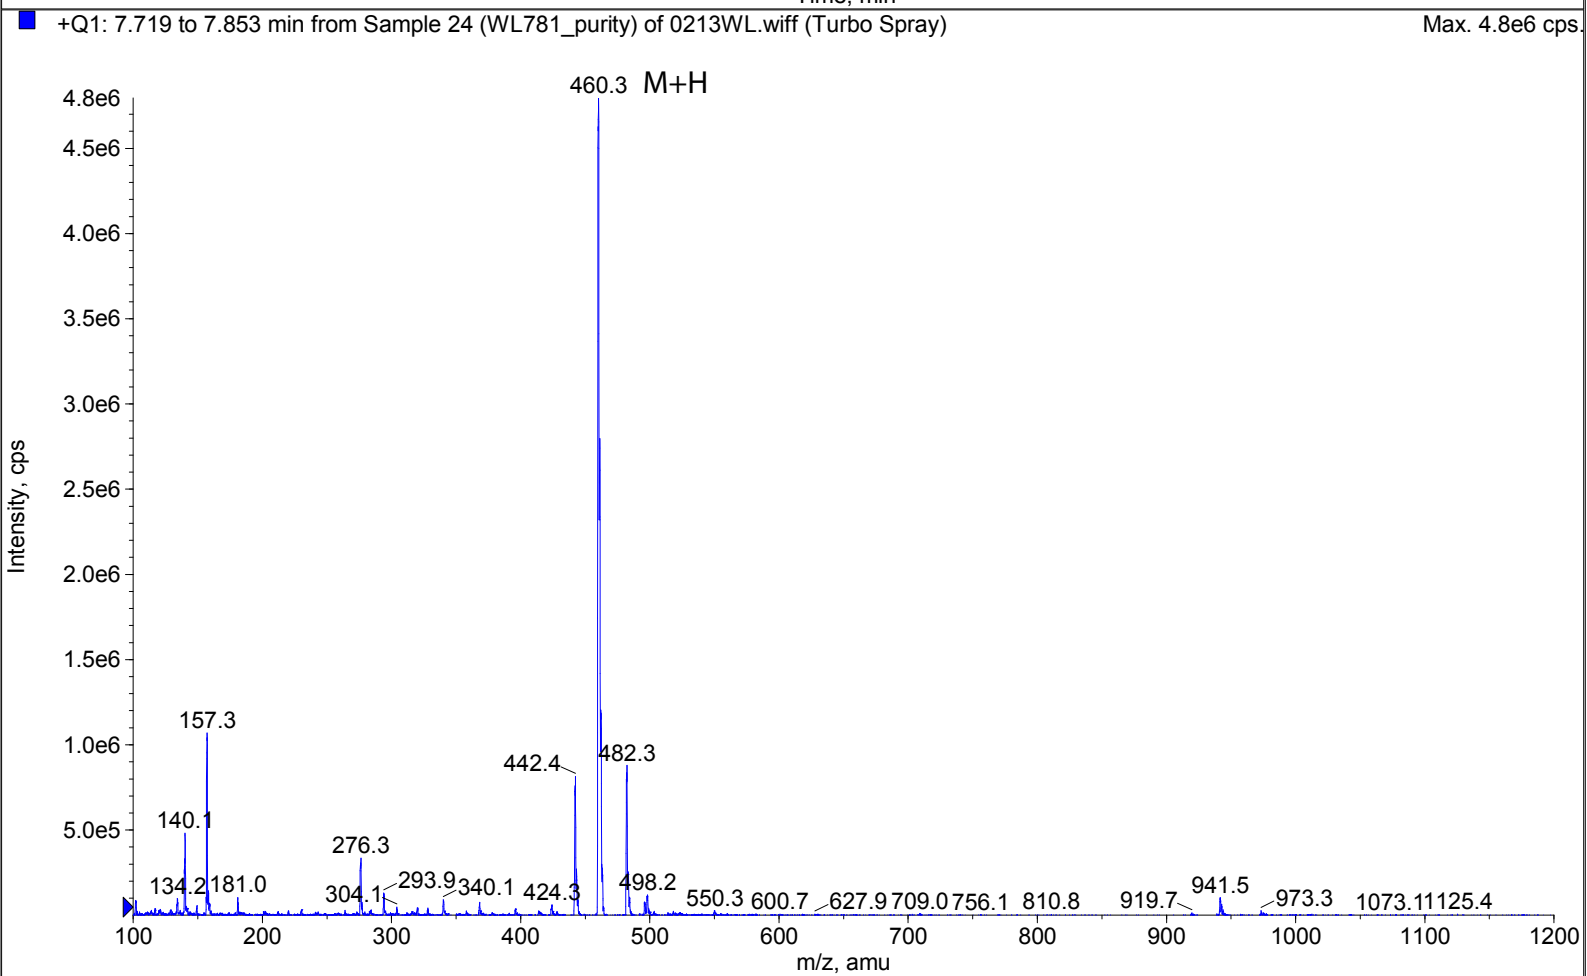

S17Et

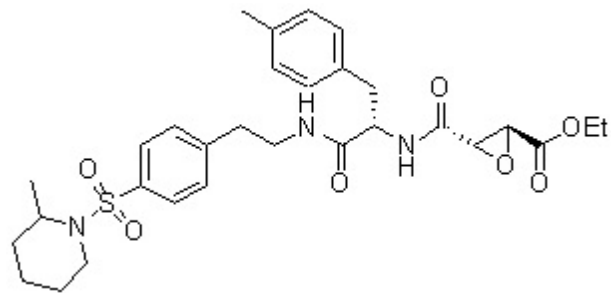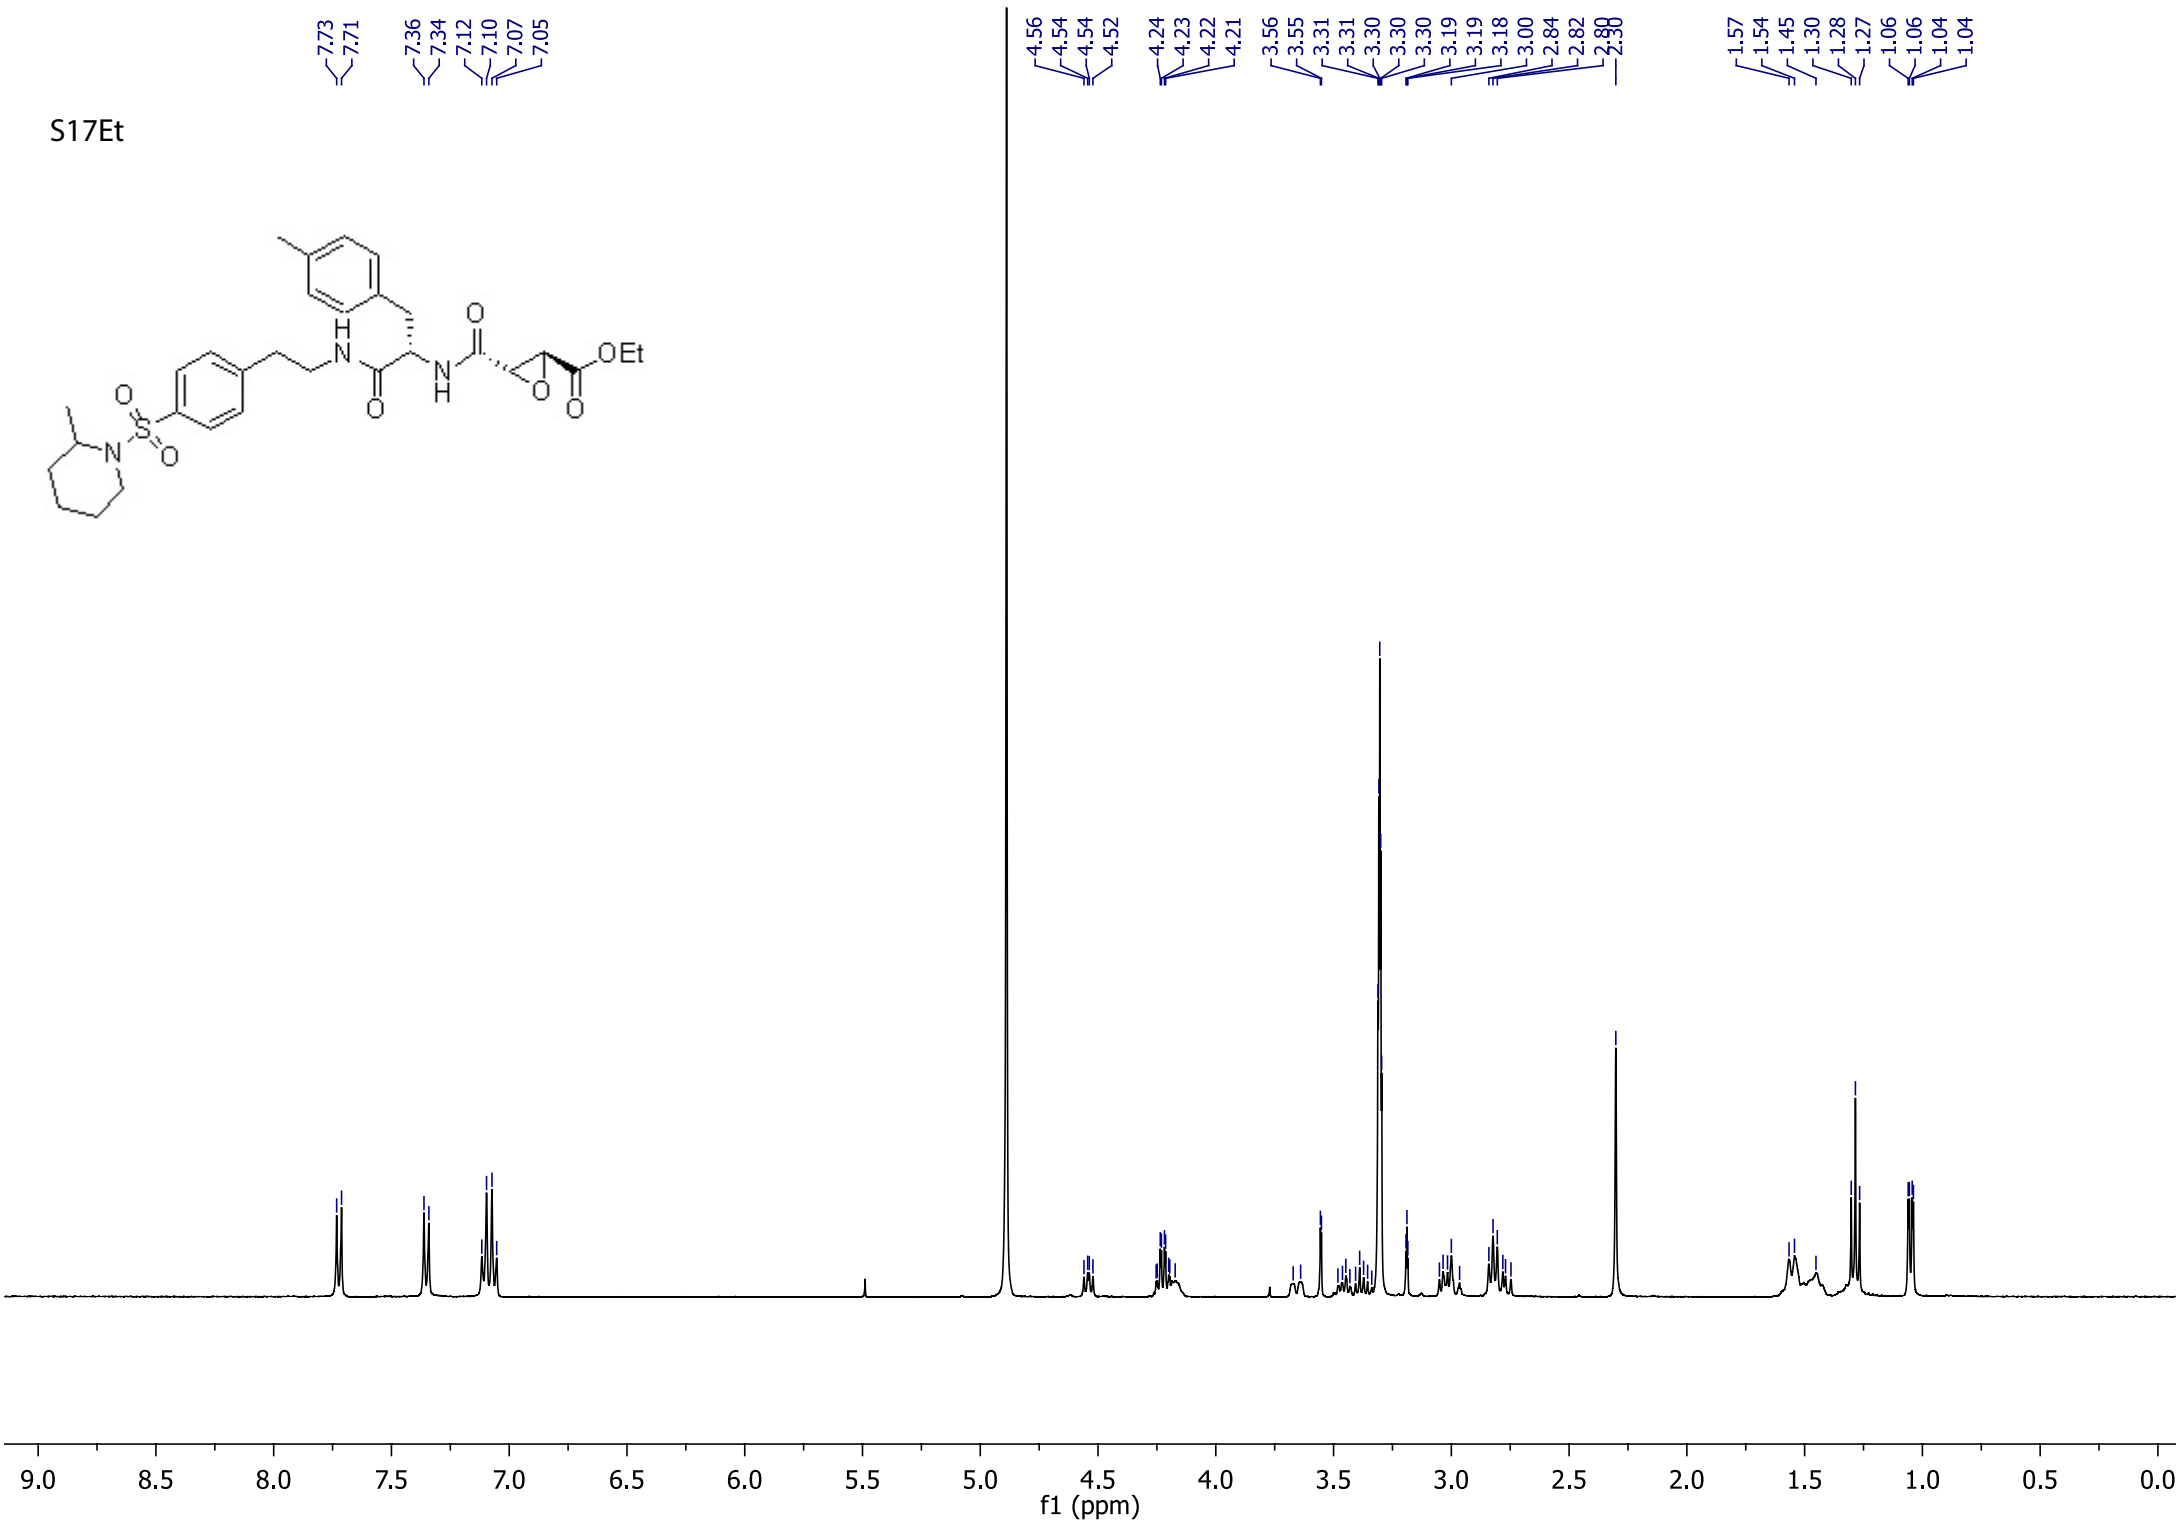

Channel 1 from Sample 38 (WL812\_purity) of 0413WL.wiff

Max. 4.6 %

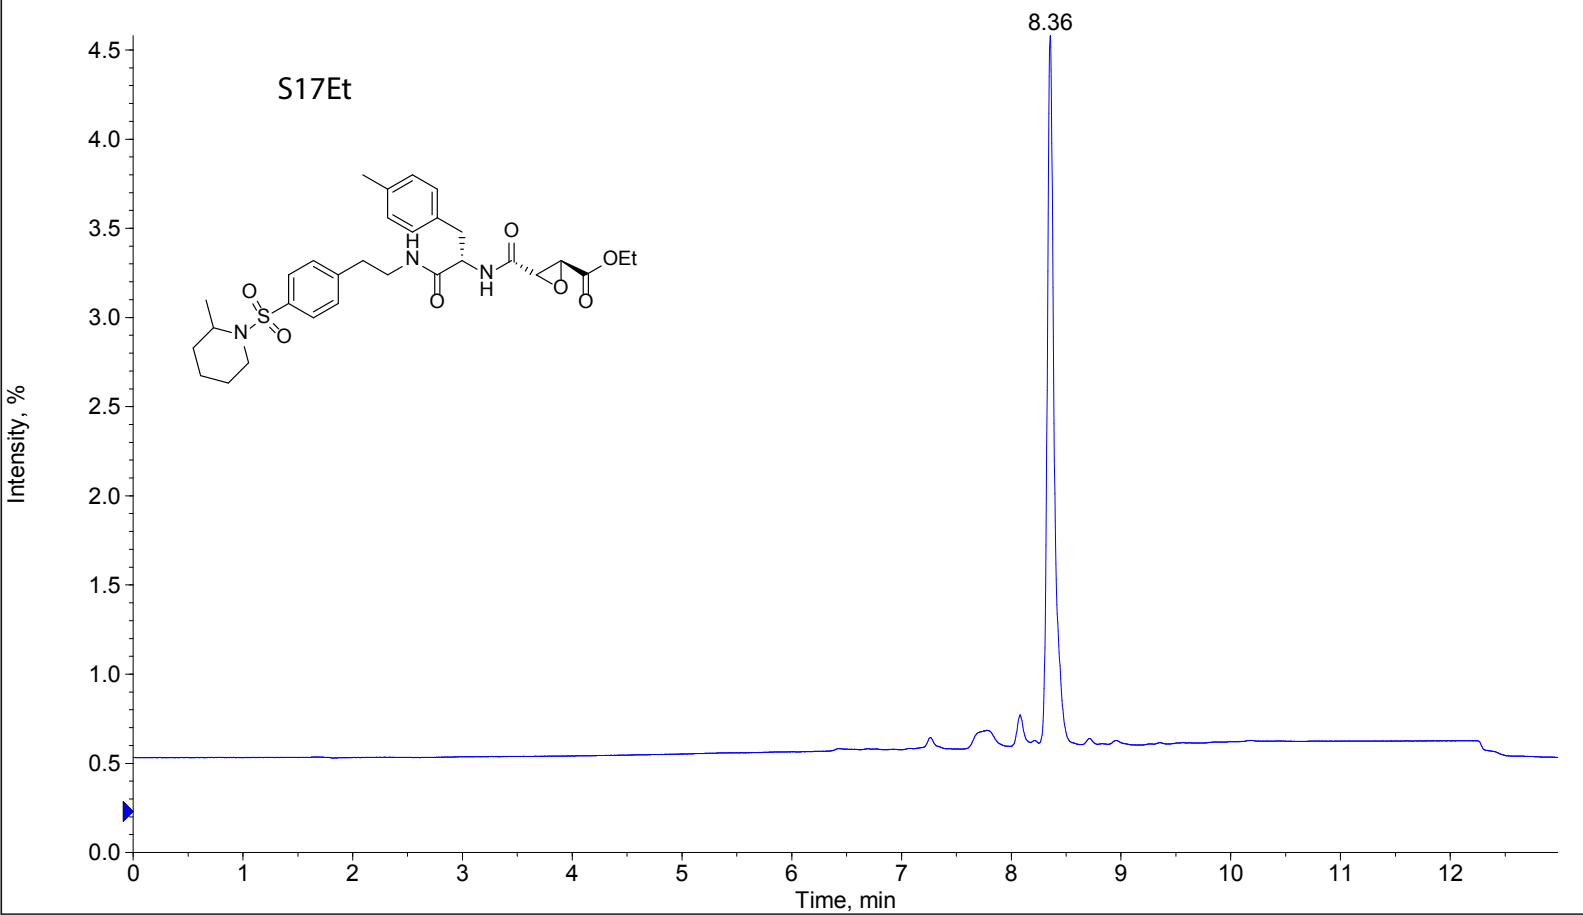

+Q1: 8.354 min from Sample 38 (WL812\_purity) of 0413WL.wiff (Turbo Spray)

Max. 6.0e6 cps

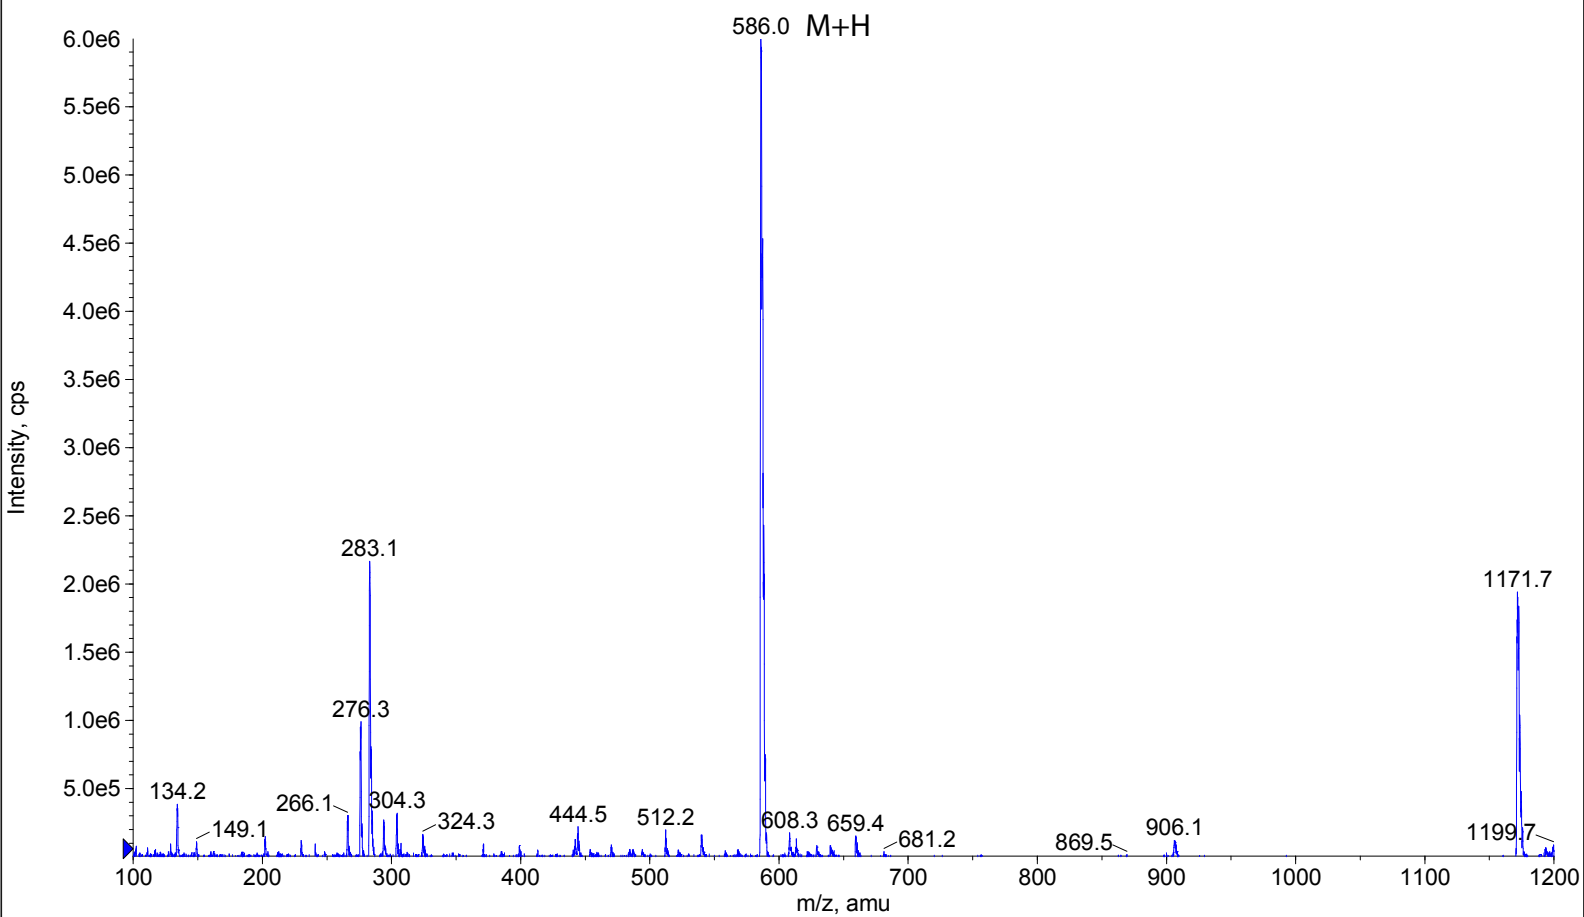

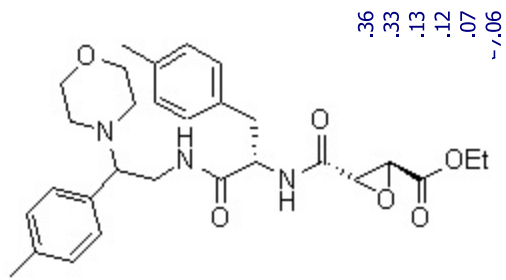

S19Et

.36  
.33  
.13  
.12  
.07  
-1.06

4.45  
4.28  
4.28  
4.27  
4.26  
4.26  
4.25  
4.24  
3.57  
3.56  
3.47  
3.47  
3.46  
3.25  
3.19  
3.19  
3.18  
2.95  
2.83  
2.80  
2.80  
2.33  
2.32

1.33  
1.32  
1.32  
1.30

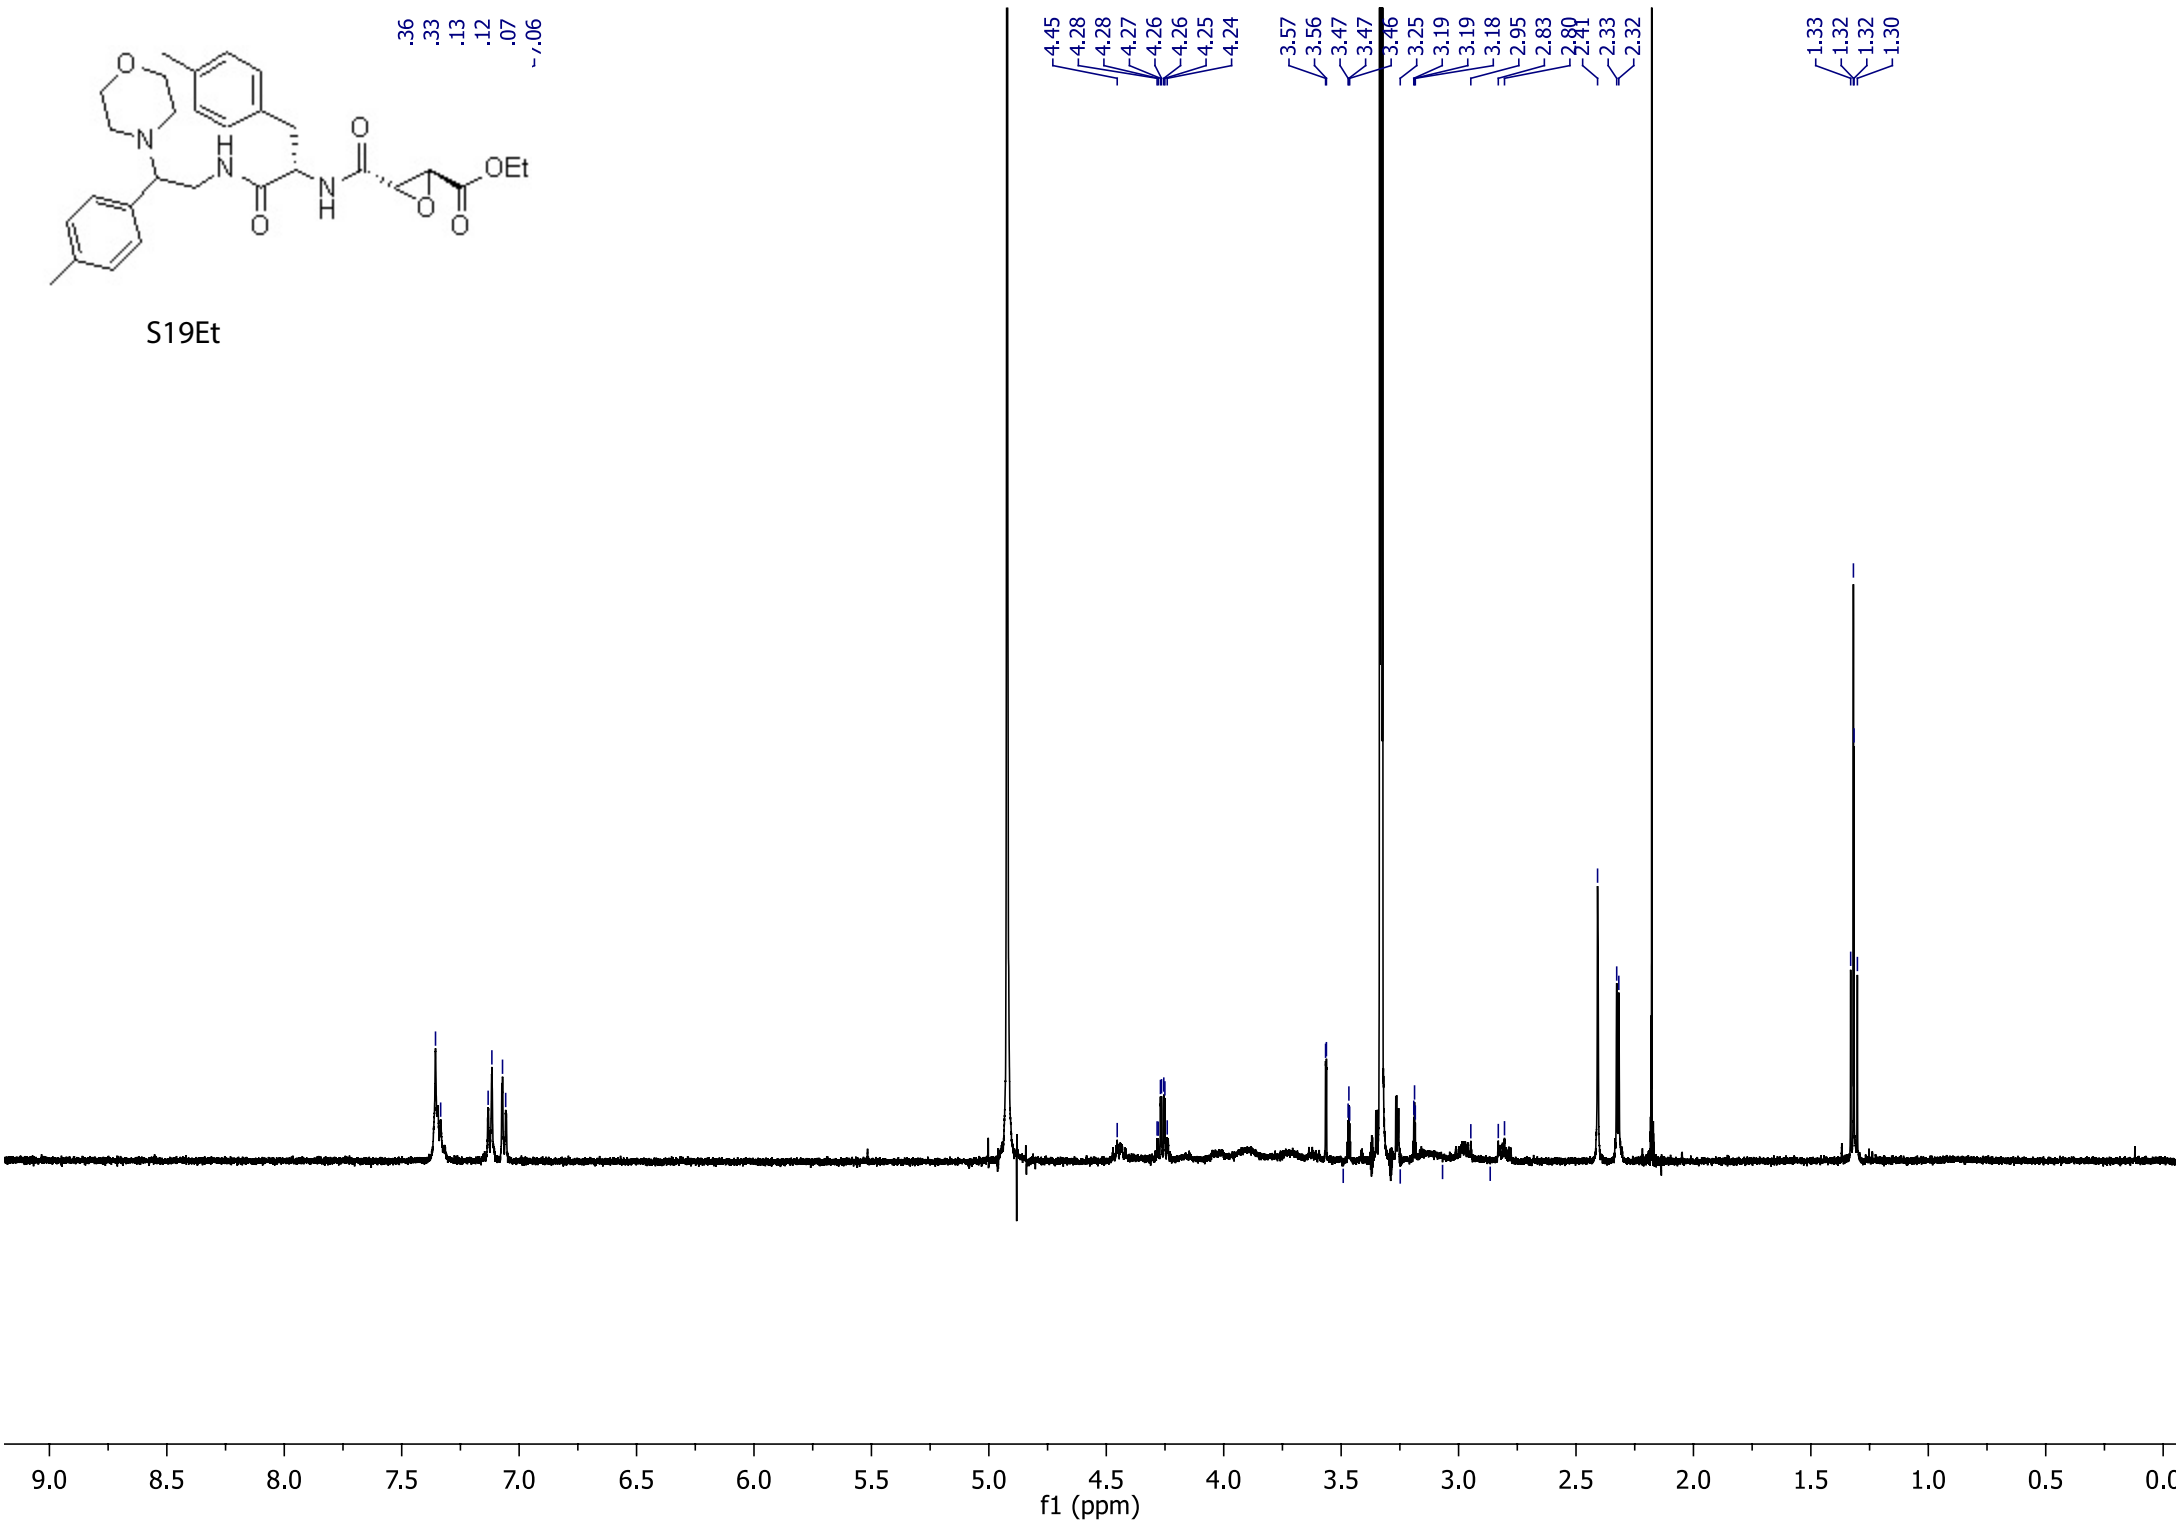



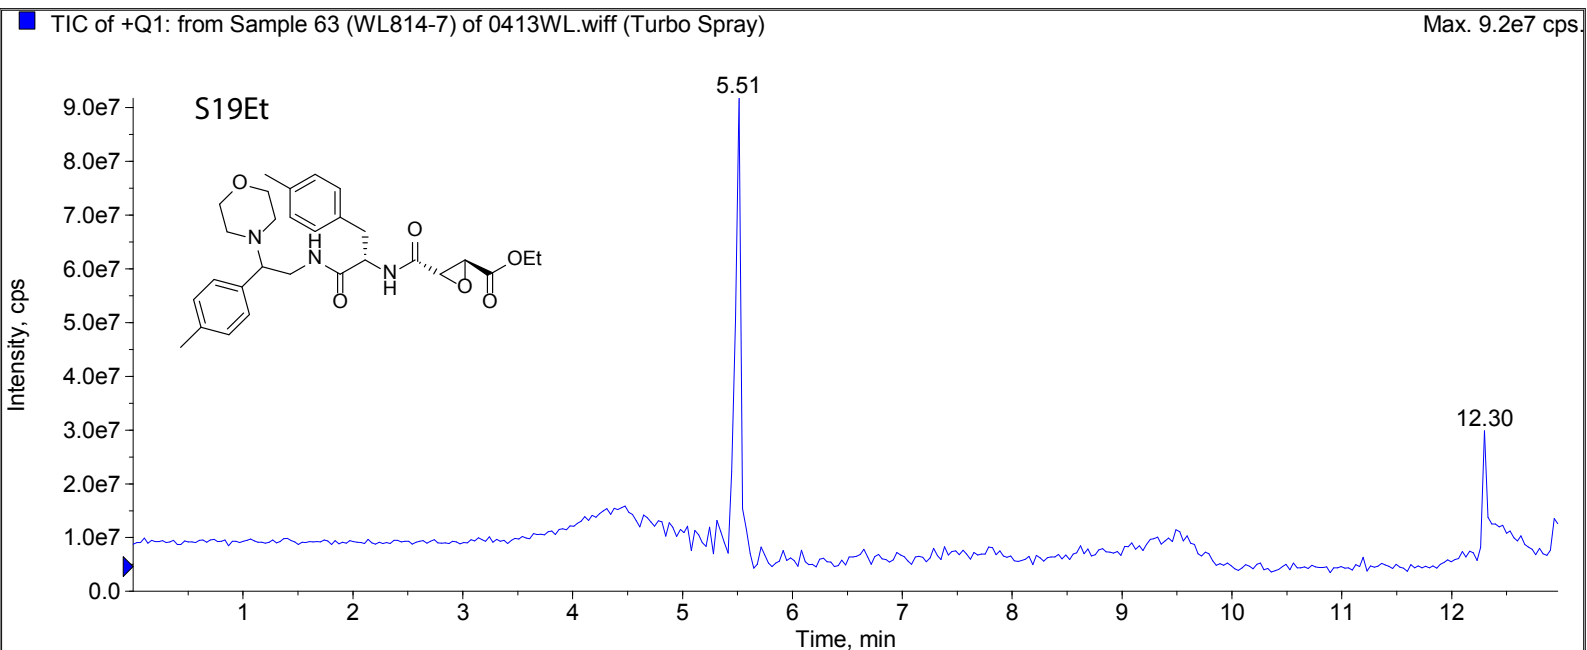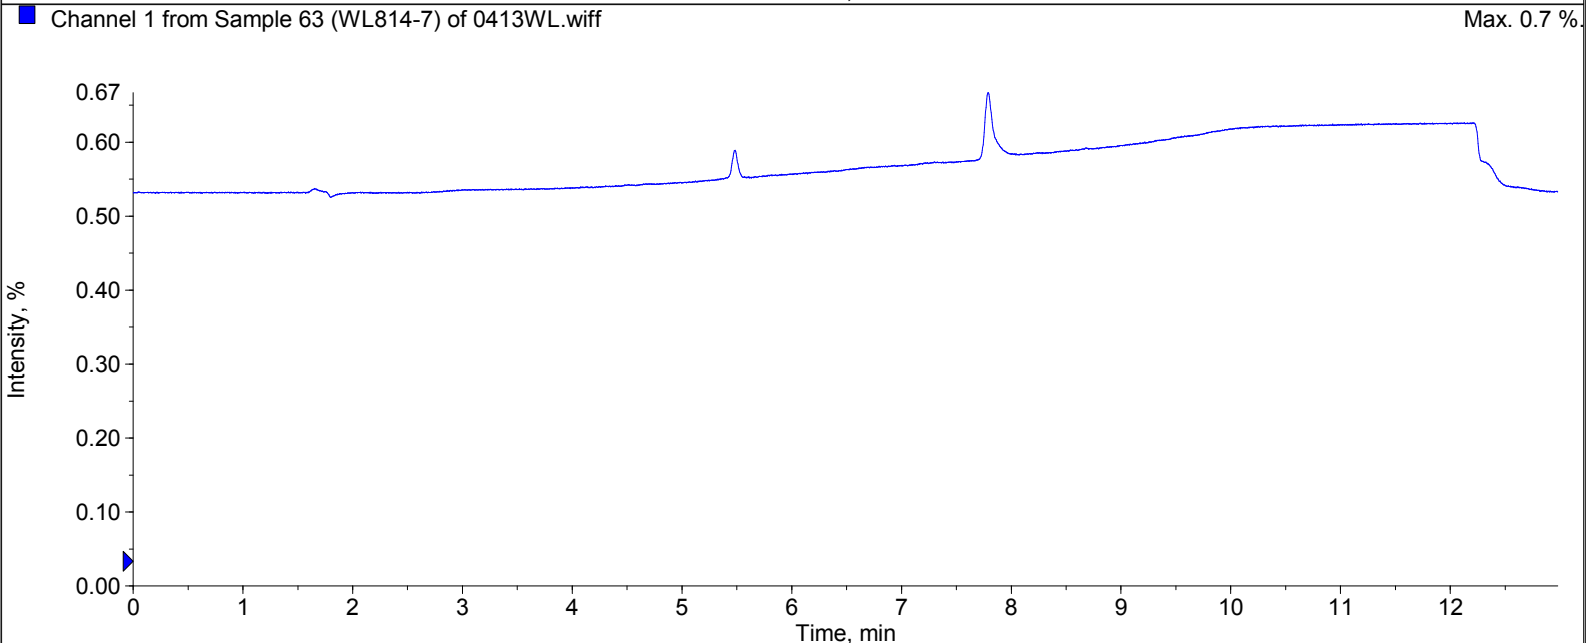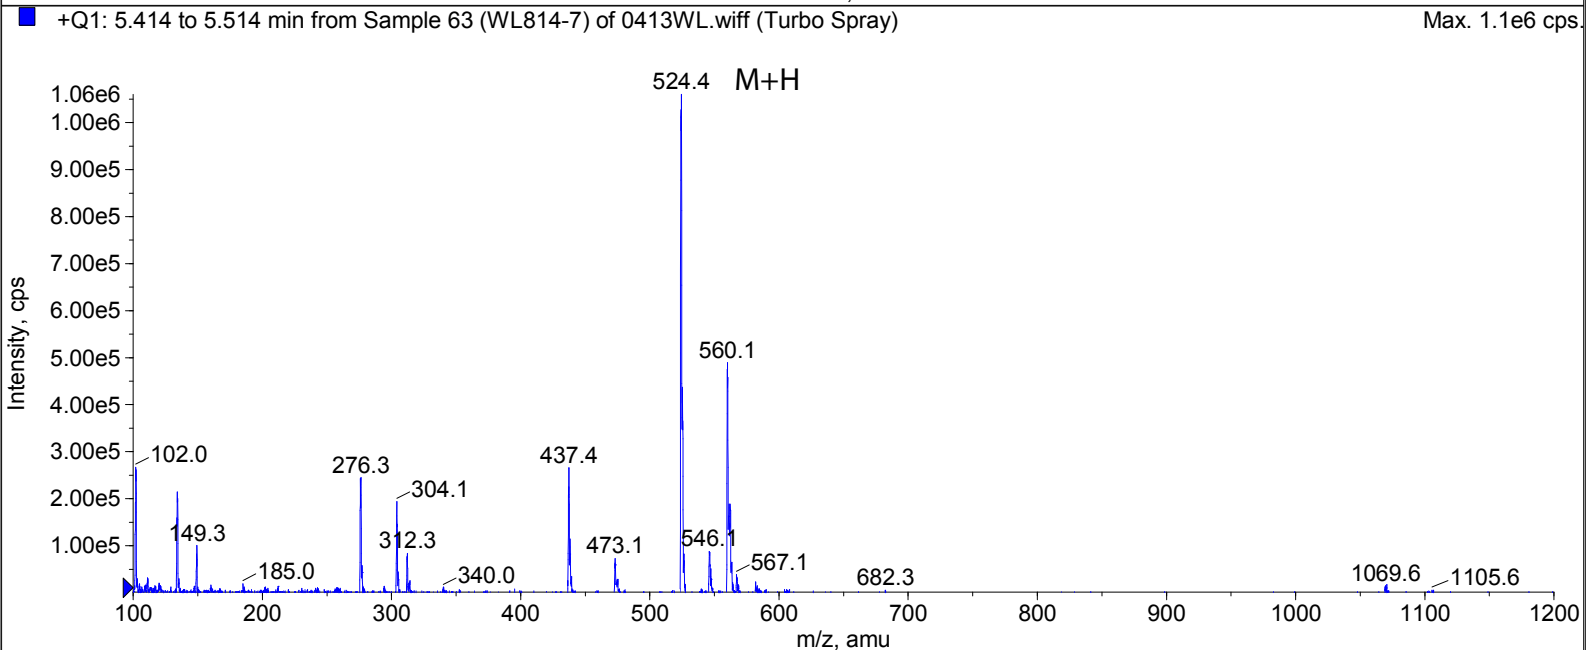

WL815two

STANDARD PROTON PARAMETERS

S20Et

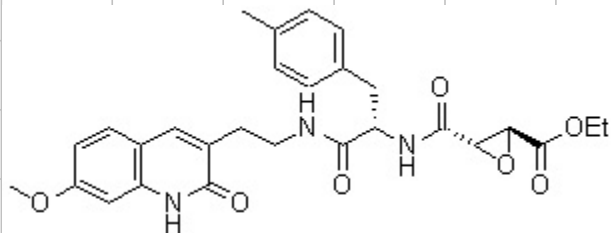

7.64  
7.49  
7.48  
7.08  
7.06  
7.05  
7.03  
6.85  
6.84  
6.83  
6.83  
6.81  
6.81

4.59  
4.58  
4.57  
4.56  
4.55  
4.54  
4.26  
4.25  
4.24  
3.88  
3.88  
3.56  
3.55  
3.45  
3.11  
3.11  
3.09  
2.82  
2.80  
2.79  
2.77  
2.76  
2.76  
2.78

1.32  
1.31  
1.29

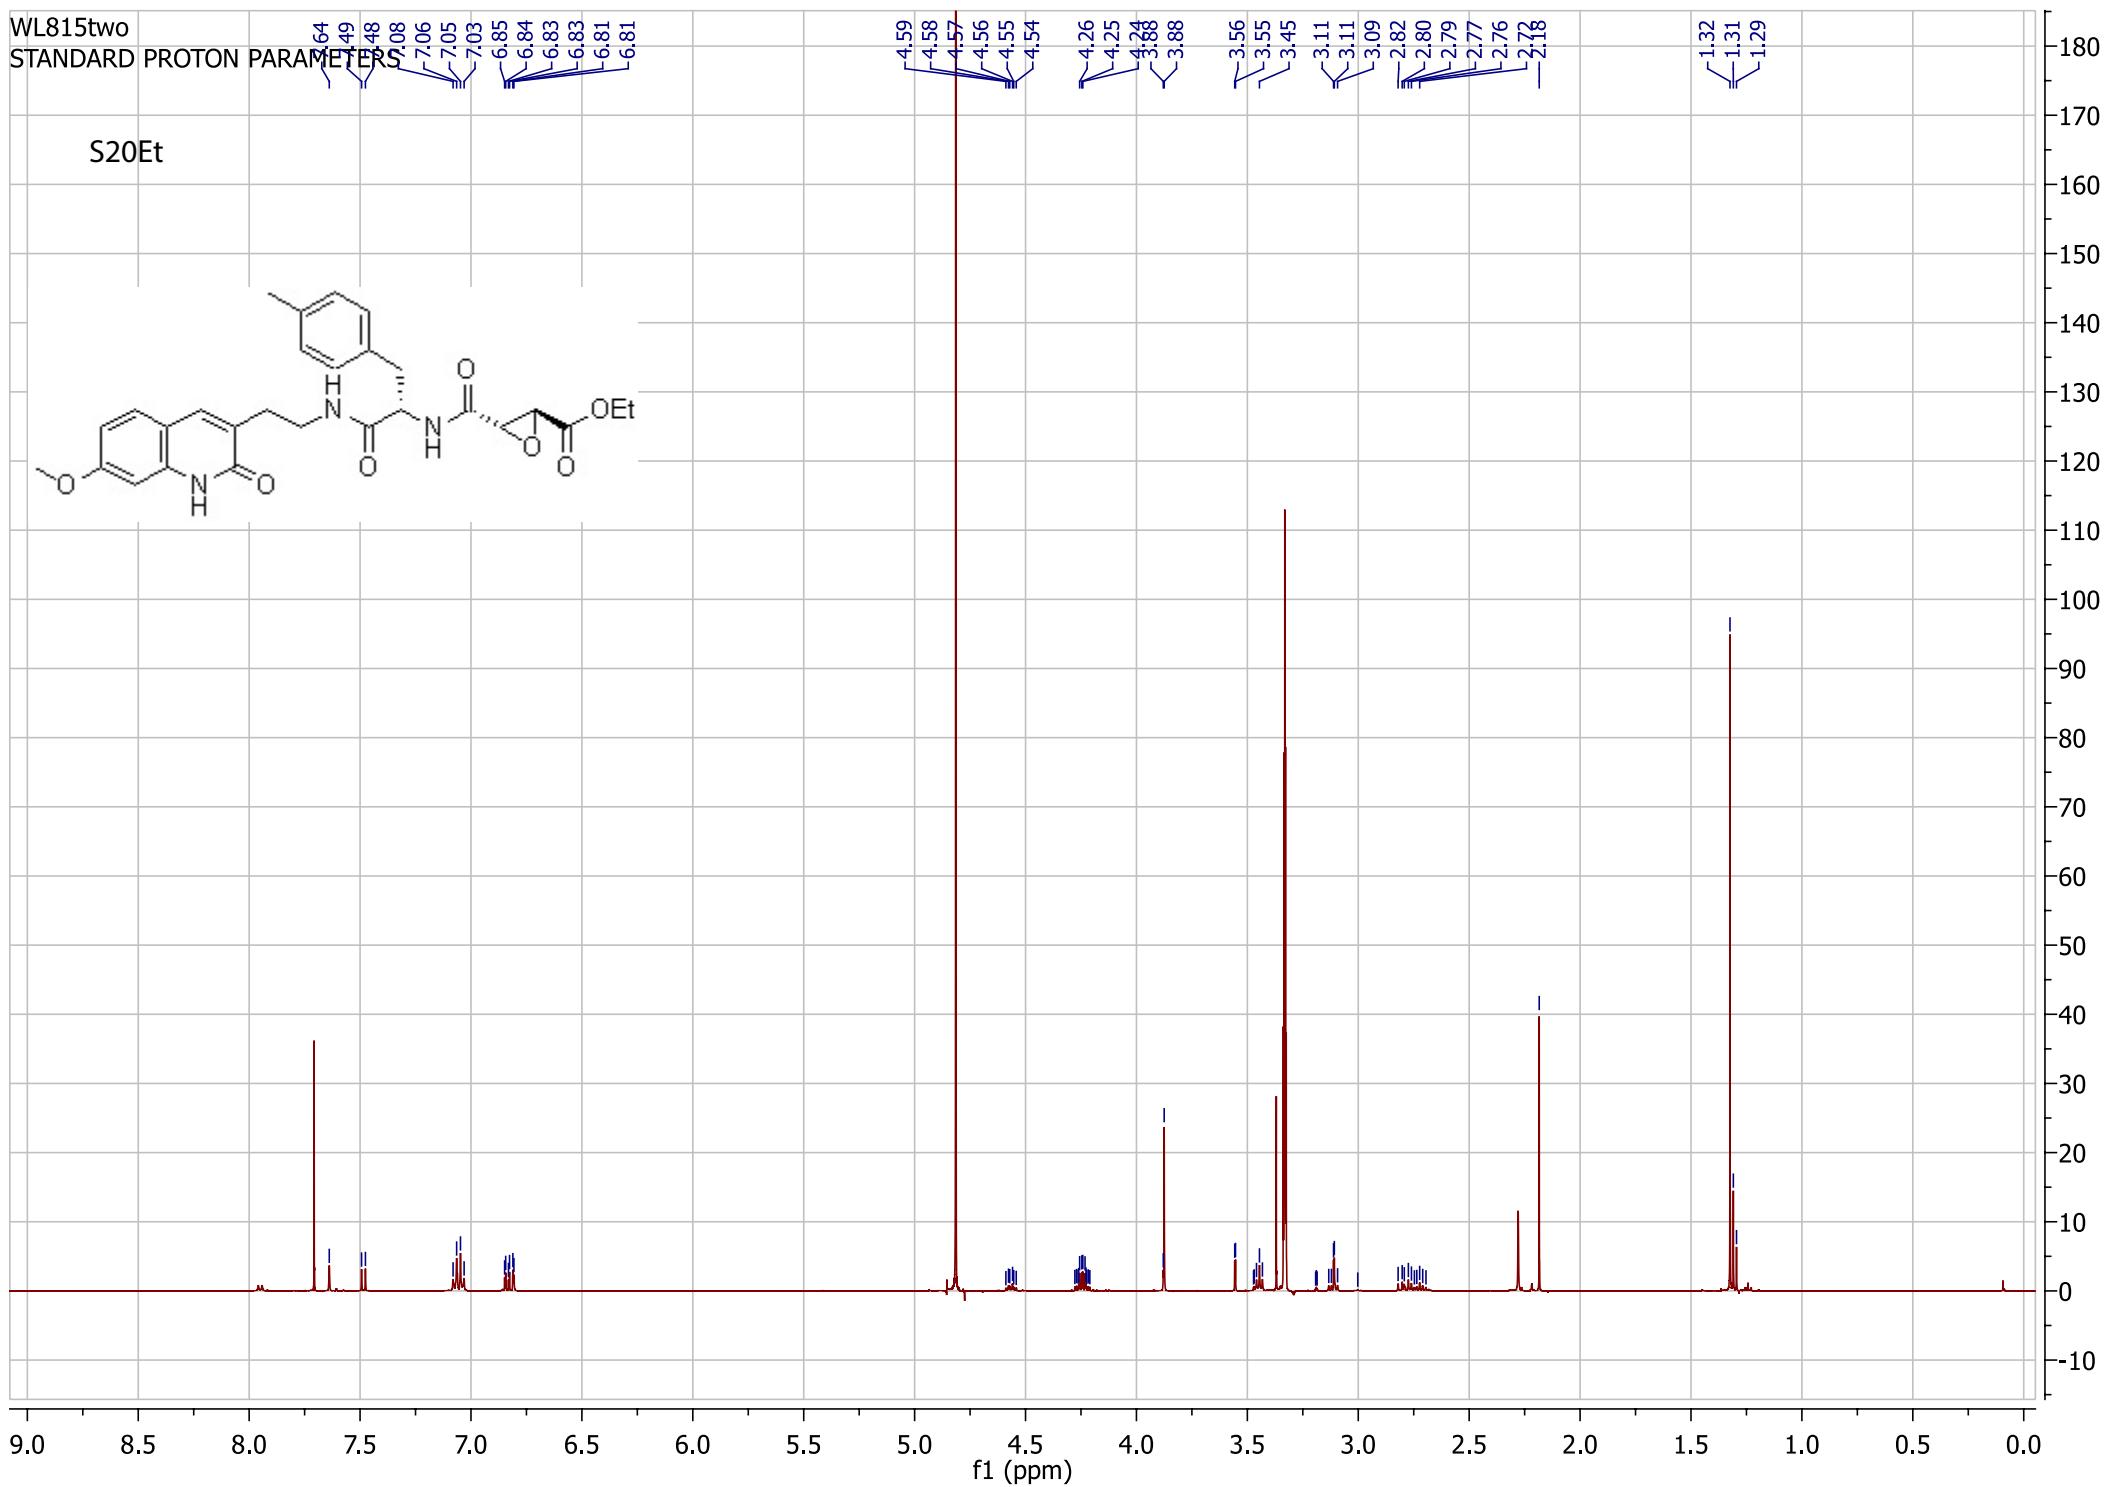

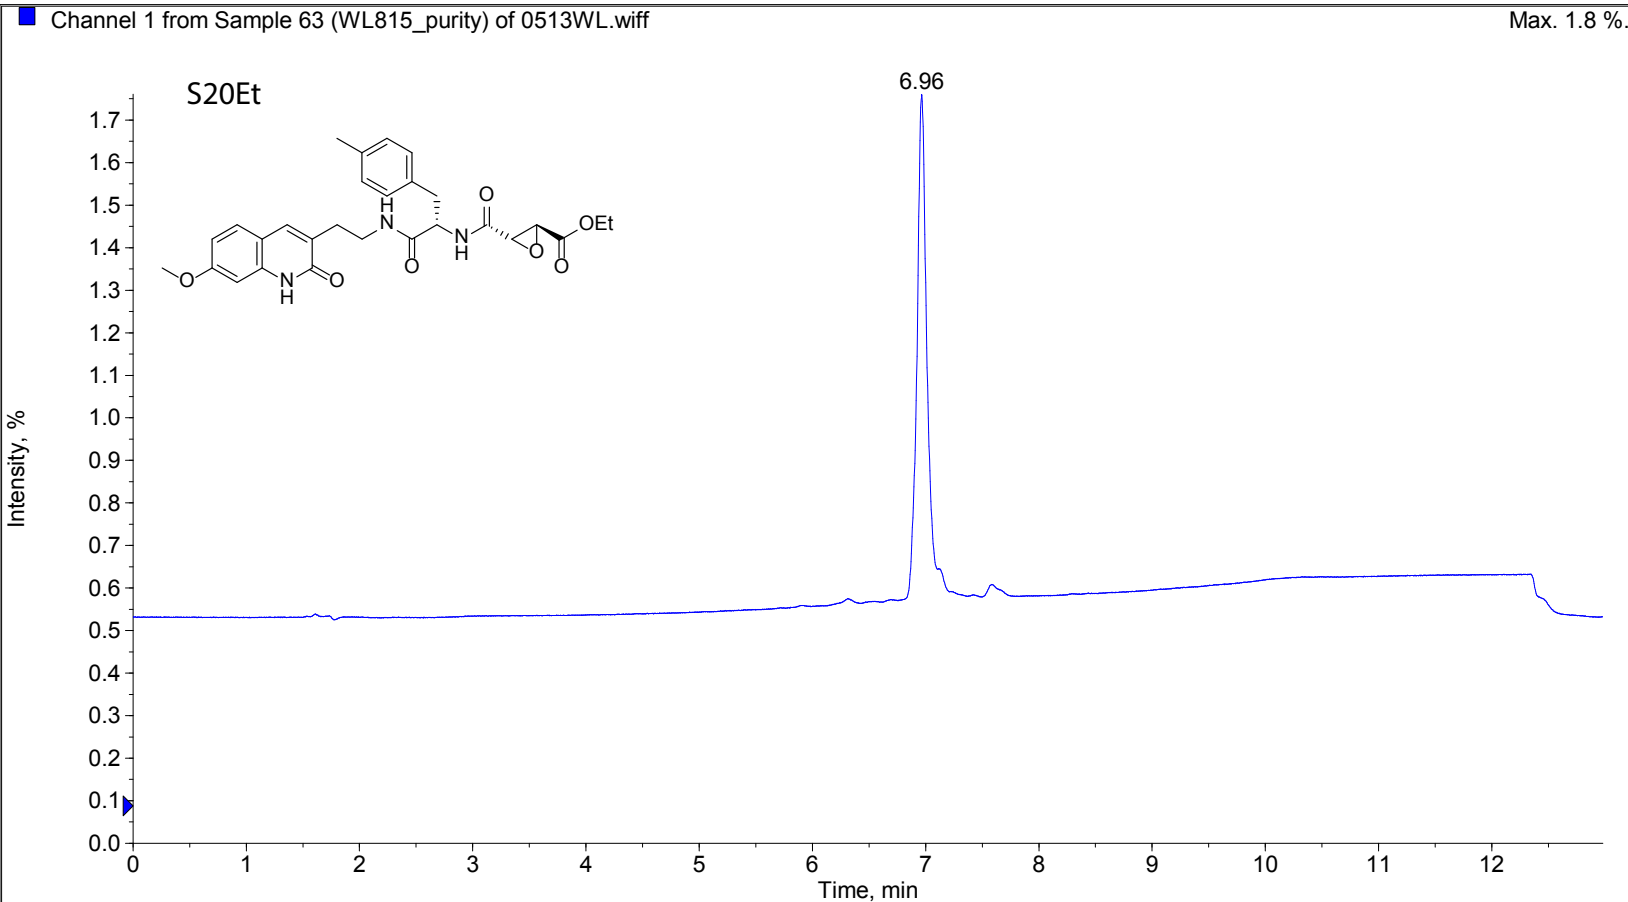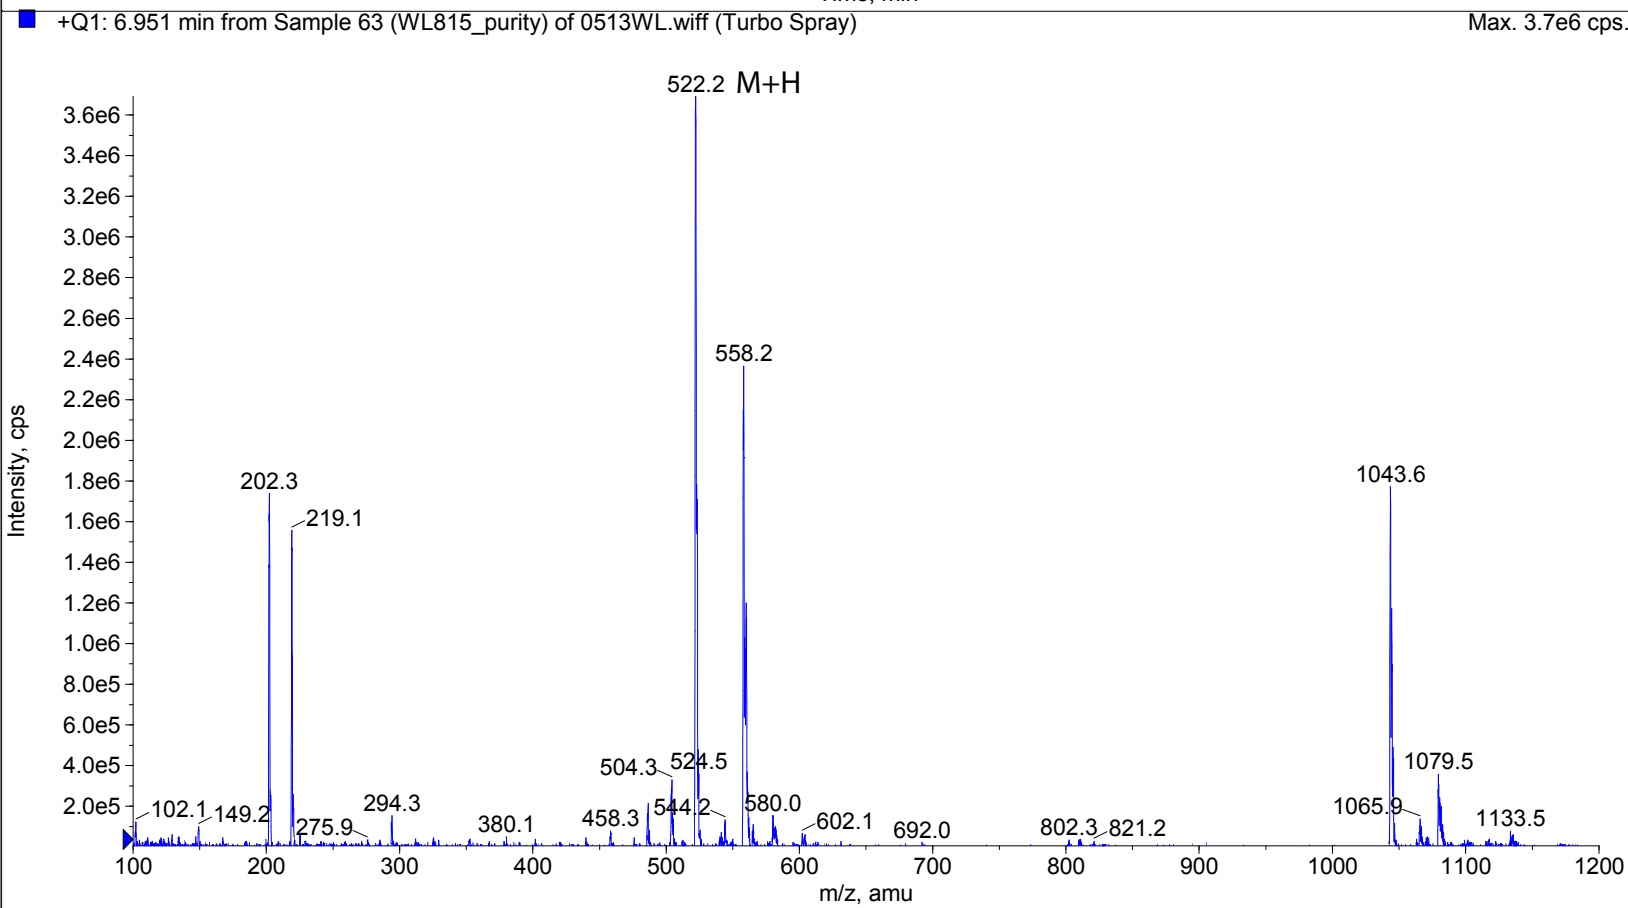

S21Et

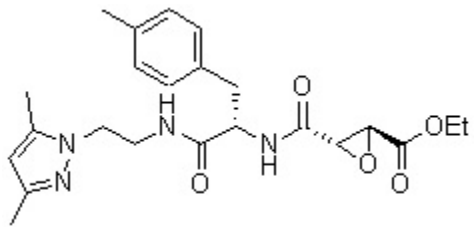

7.12  
7.10  
7.08  
7.06

5.98

4.55  
4.54  
4.53  
4.52  
4.24  
4.23  
4.22  
4.21  
4.11

3.54  
3.53  
3.52

3.12  
3.12  
2.87  
2.78  
2.77  
2.75

2.30  
2.26  
2.23

1.30  
1.29  
1.27

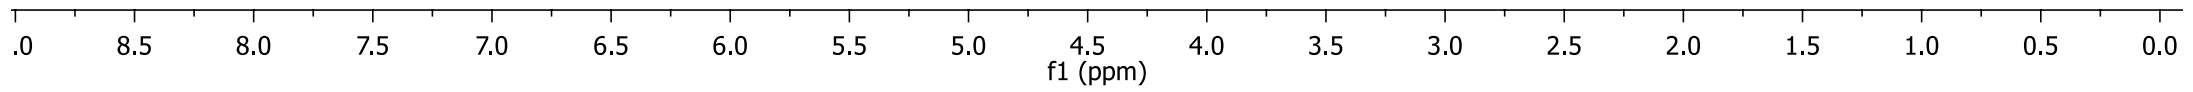

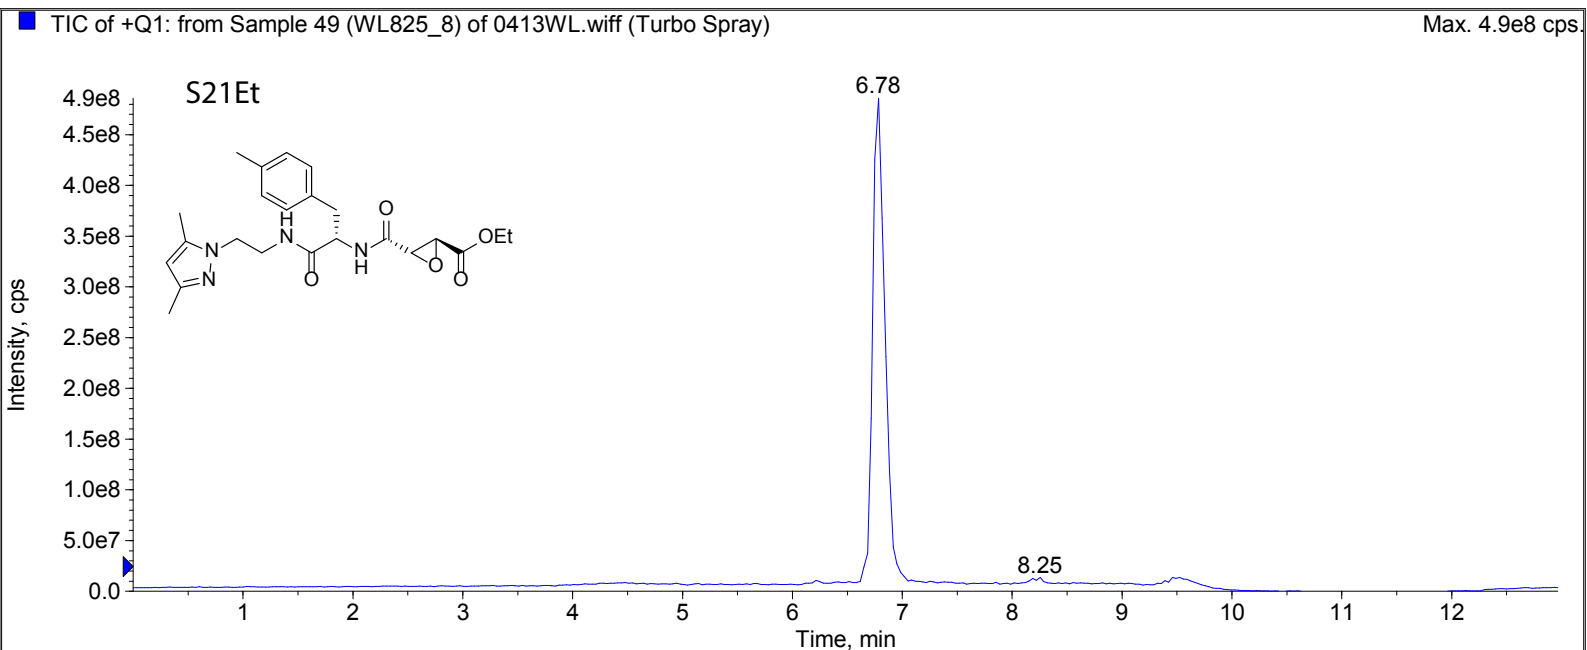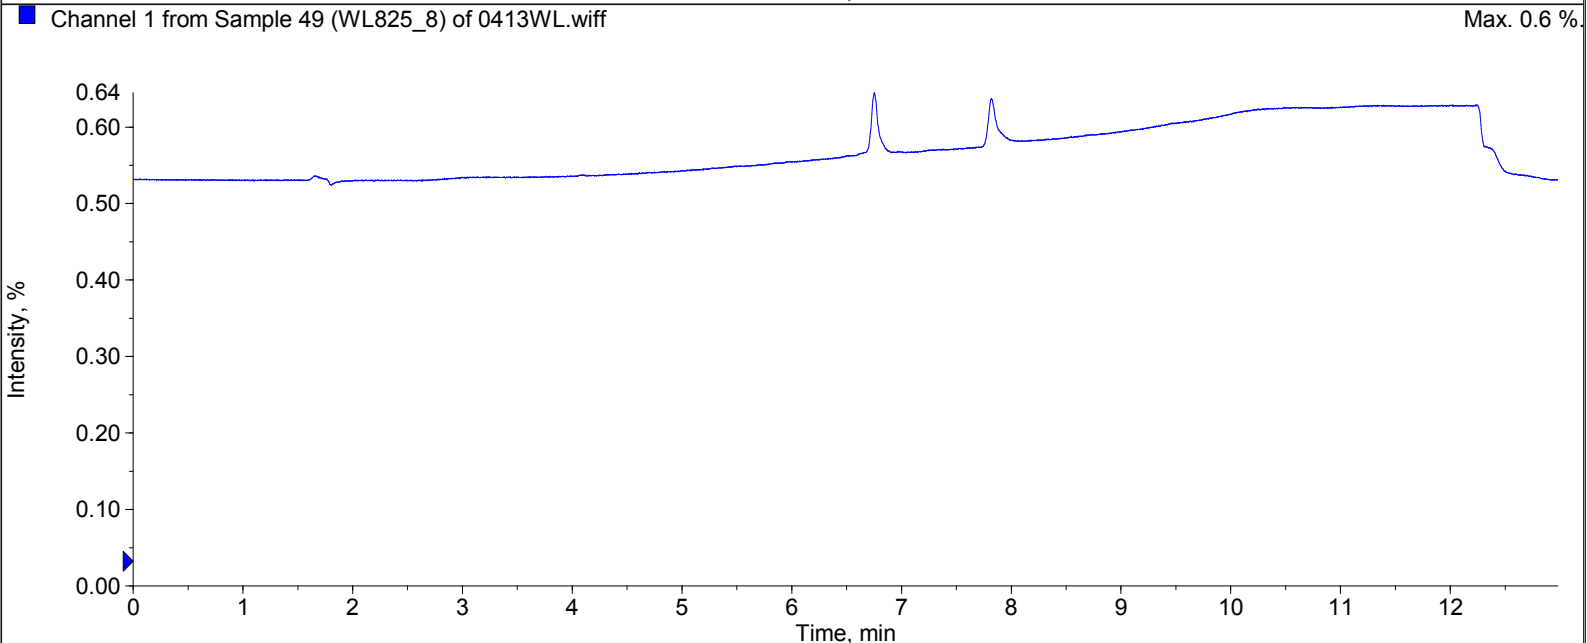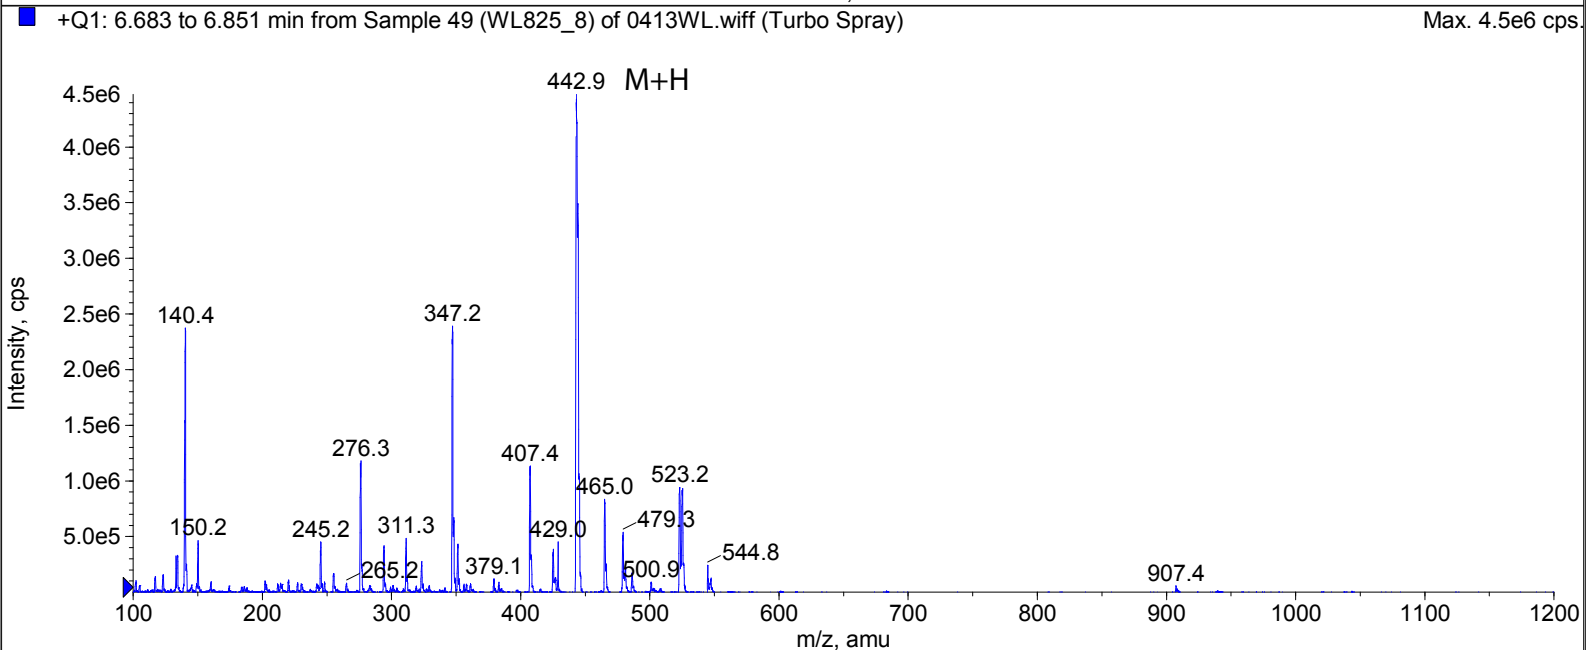

8.77  
8.74  
8.36  
8.34  
8.28  
8.26  
7.88  
7.86  
7.84  
7.83  
7.82  
7.81

7.13  
7.11  
7.08  
7.06

4.43  
4.41  
4.41  
4.39  
4.38  
4.38  
4.36  
4.29  
4.27  
4.27  
4.27  
4.25  
4.25  
4.25  
4.25  
4.23  
4.01  
3.98  
3.96  
3.85  
3.84  
3.83  
3.81  
3.79  
3.62  
3.60  
3.58  
3.58  
3.57  
3.55  
3.55

3.28  
3.24  
2.99  
2.98  
2.97  
2.83  
2.82  
2.81  
2.80  
2.80

1.33  
1.32  
1.30

S22Et

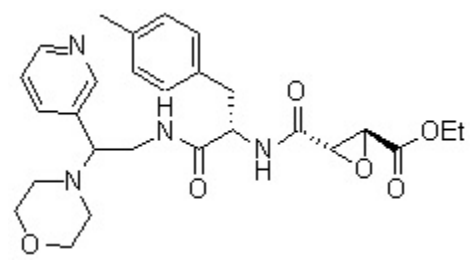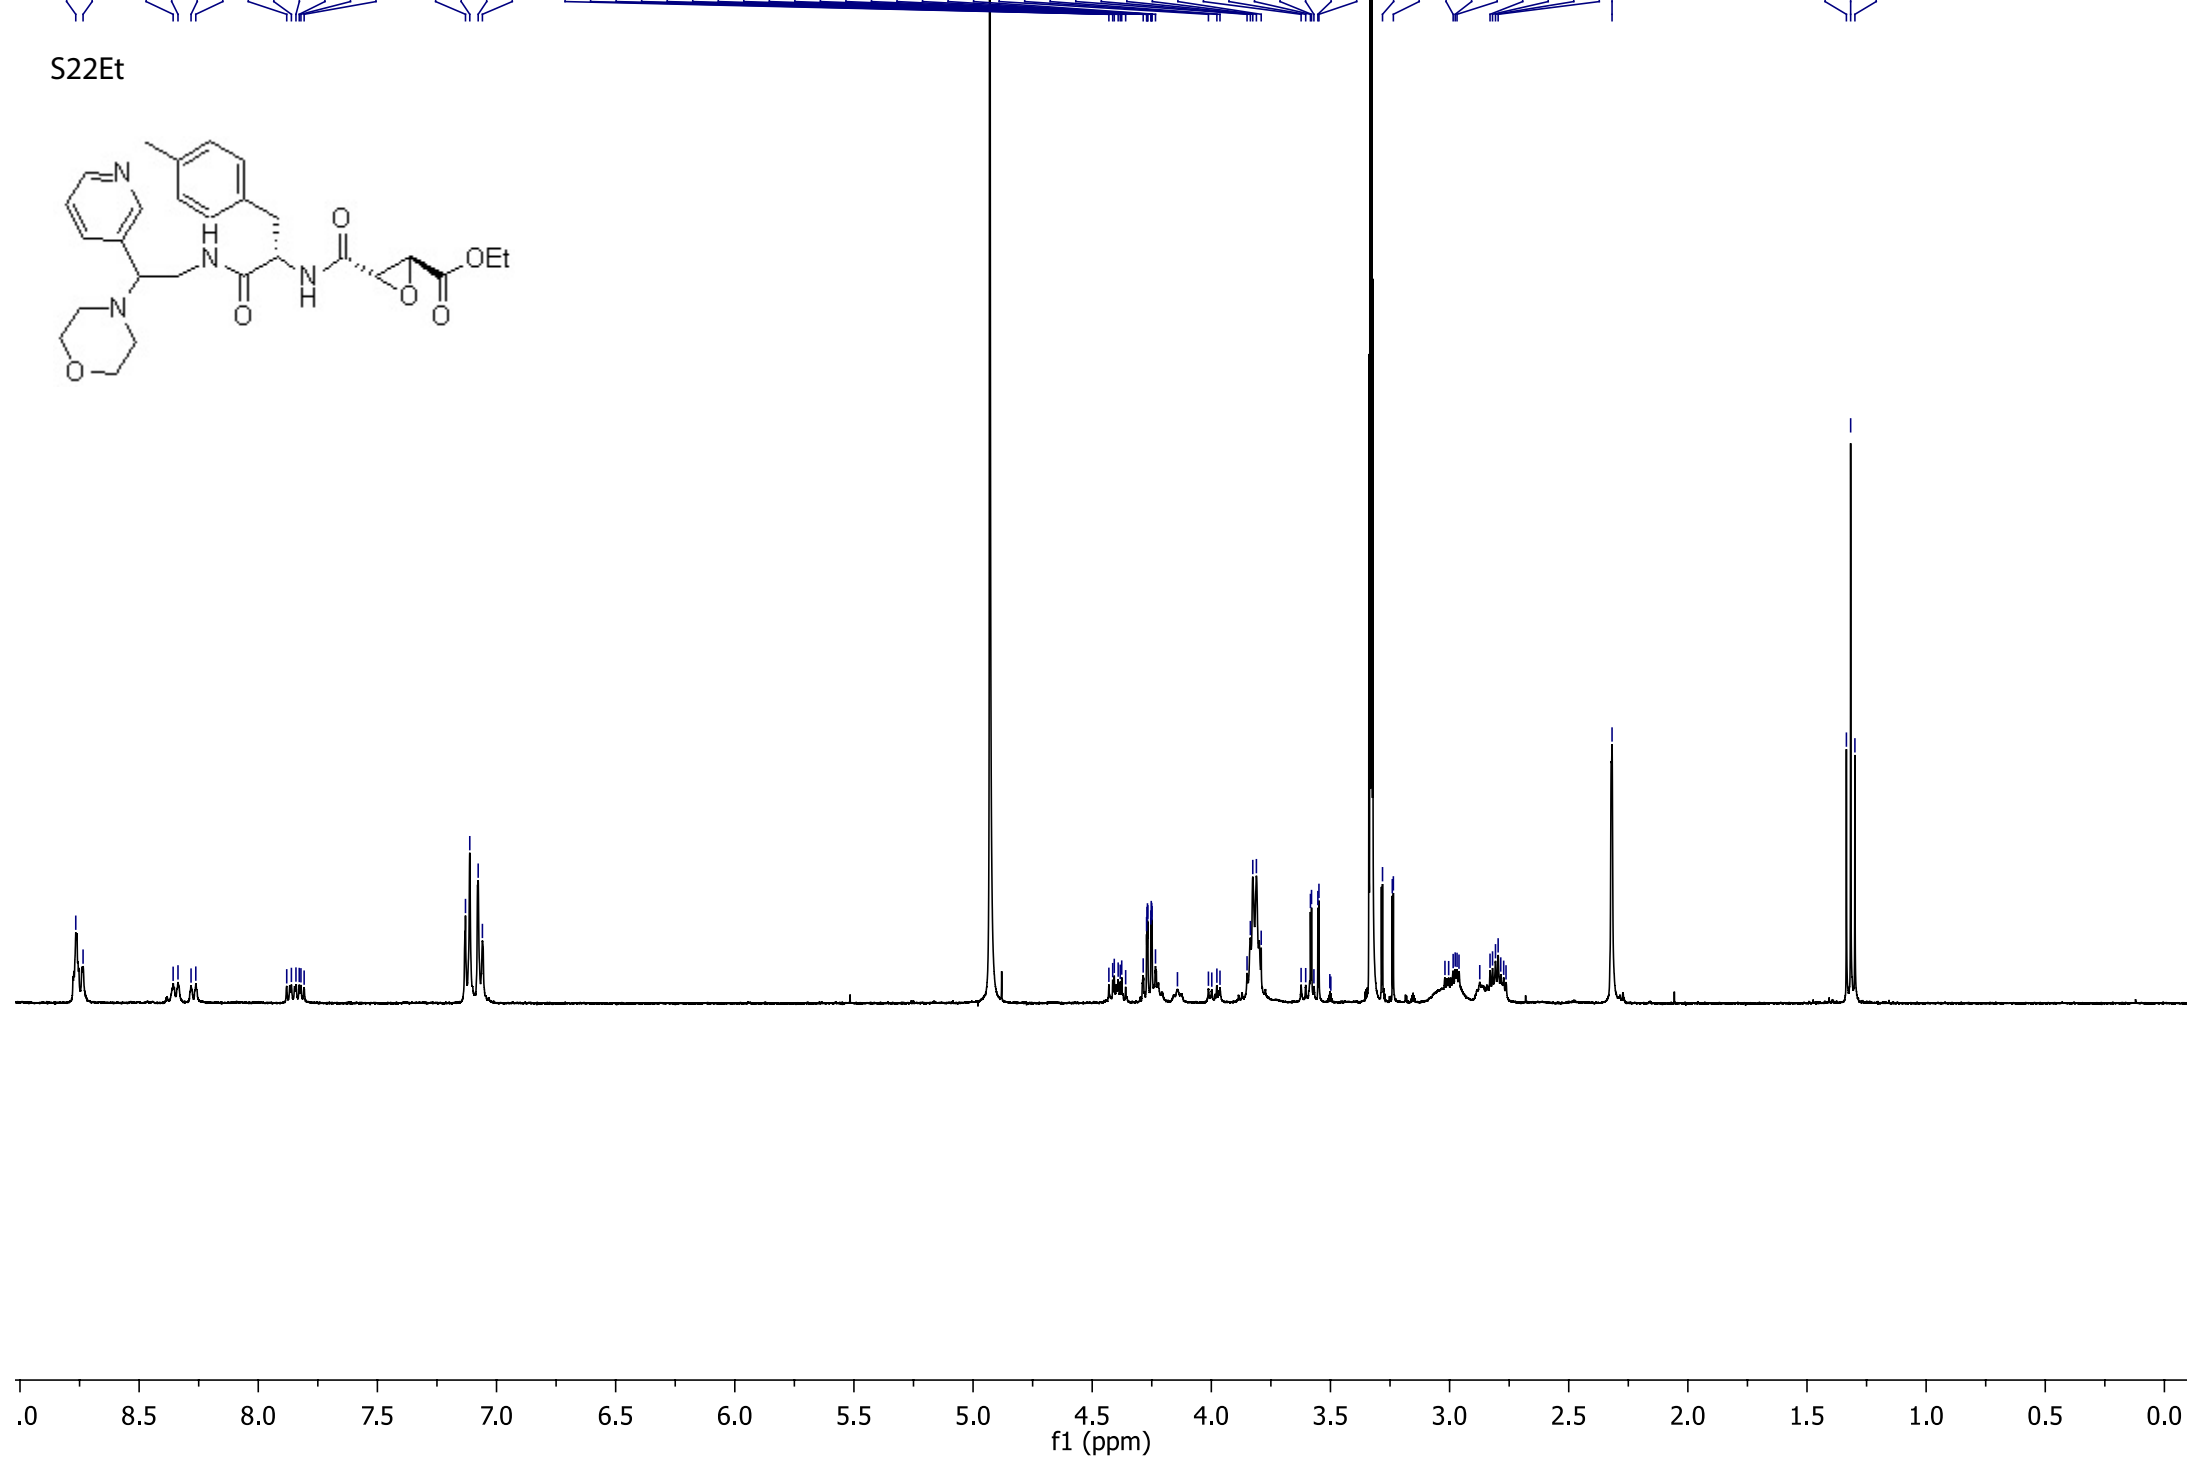

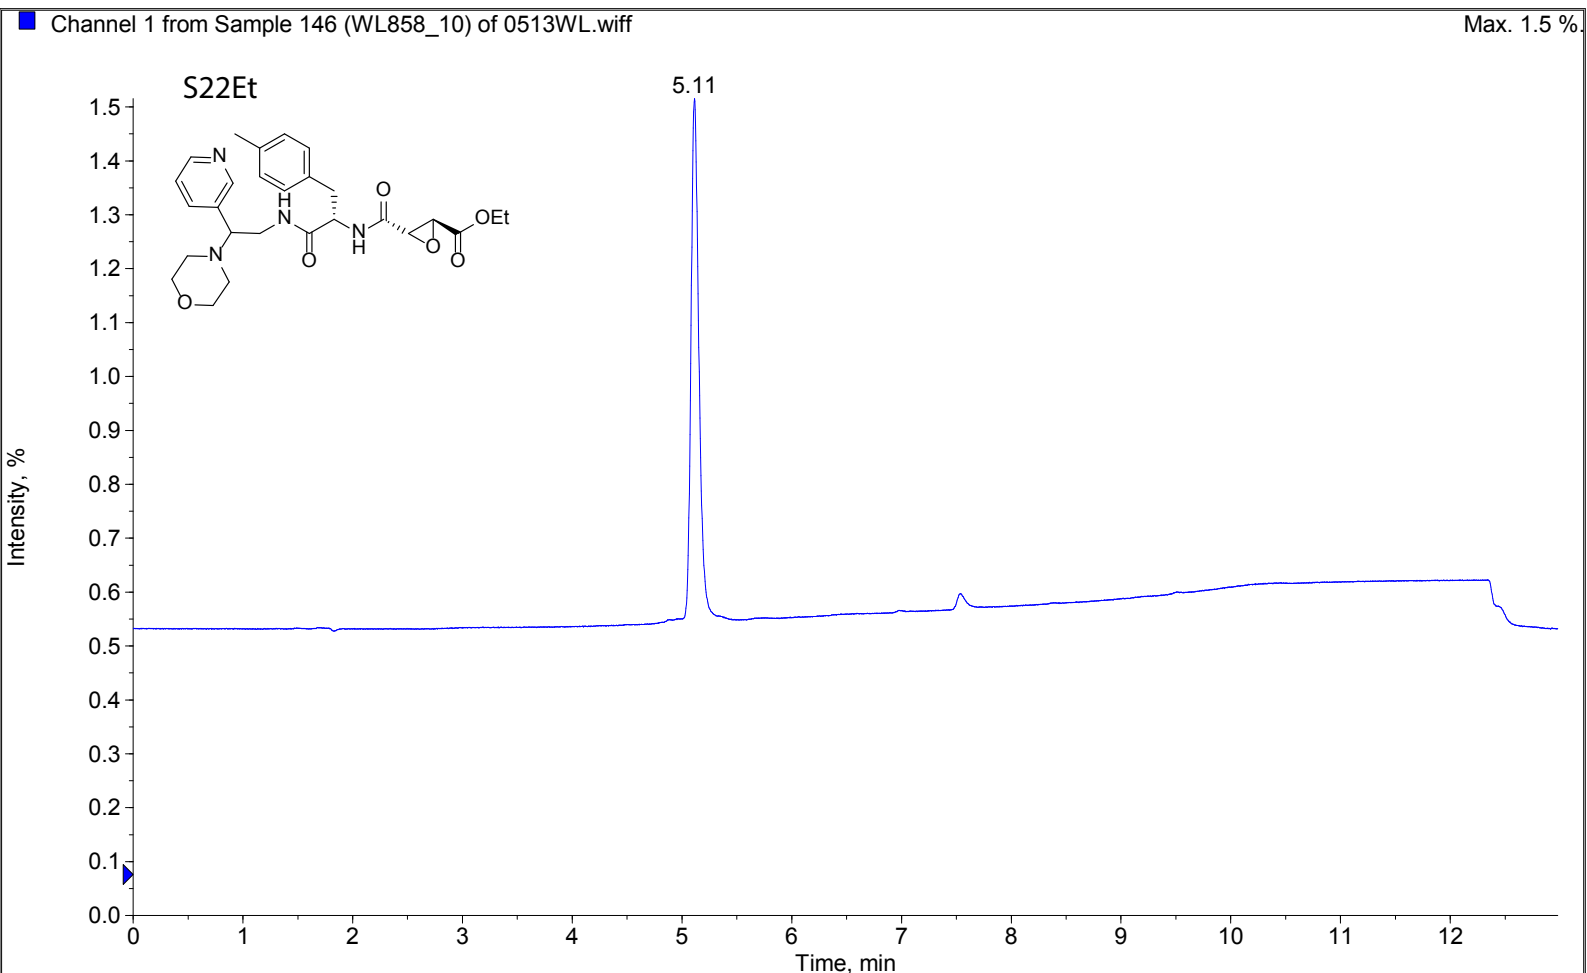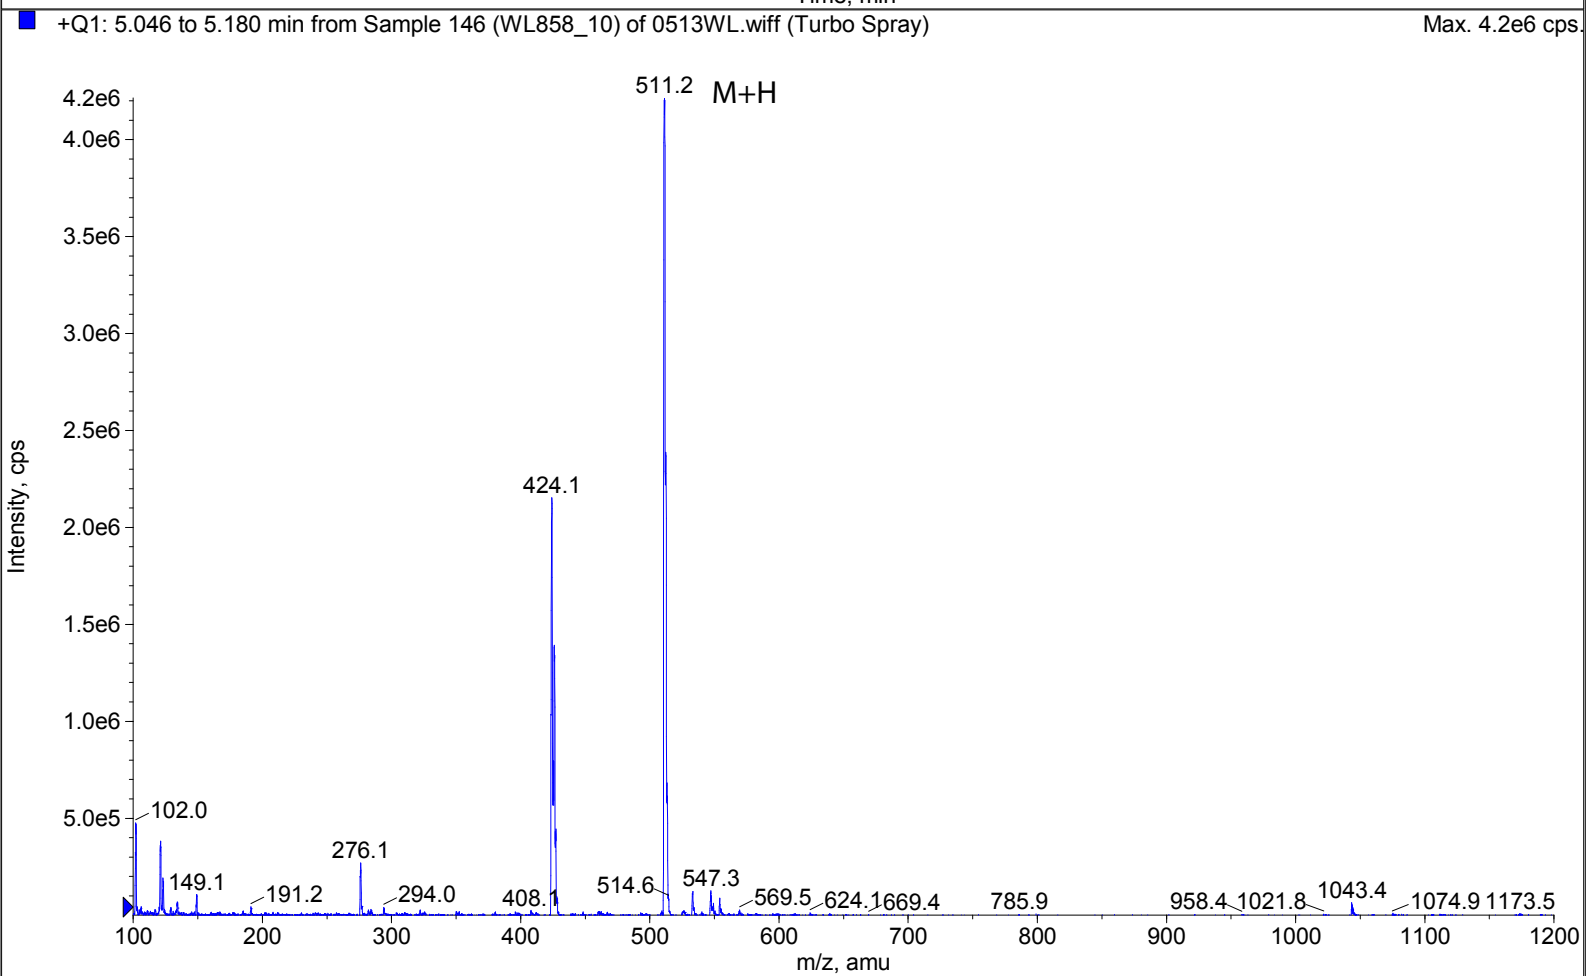

S24Et

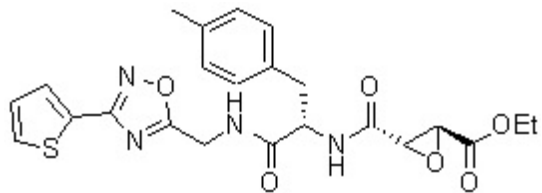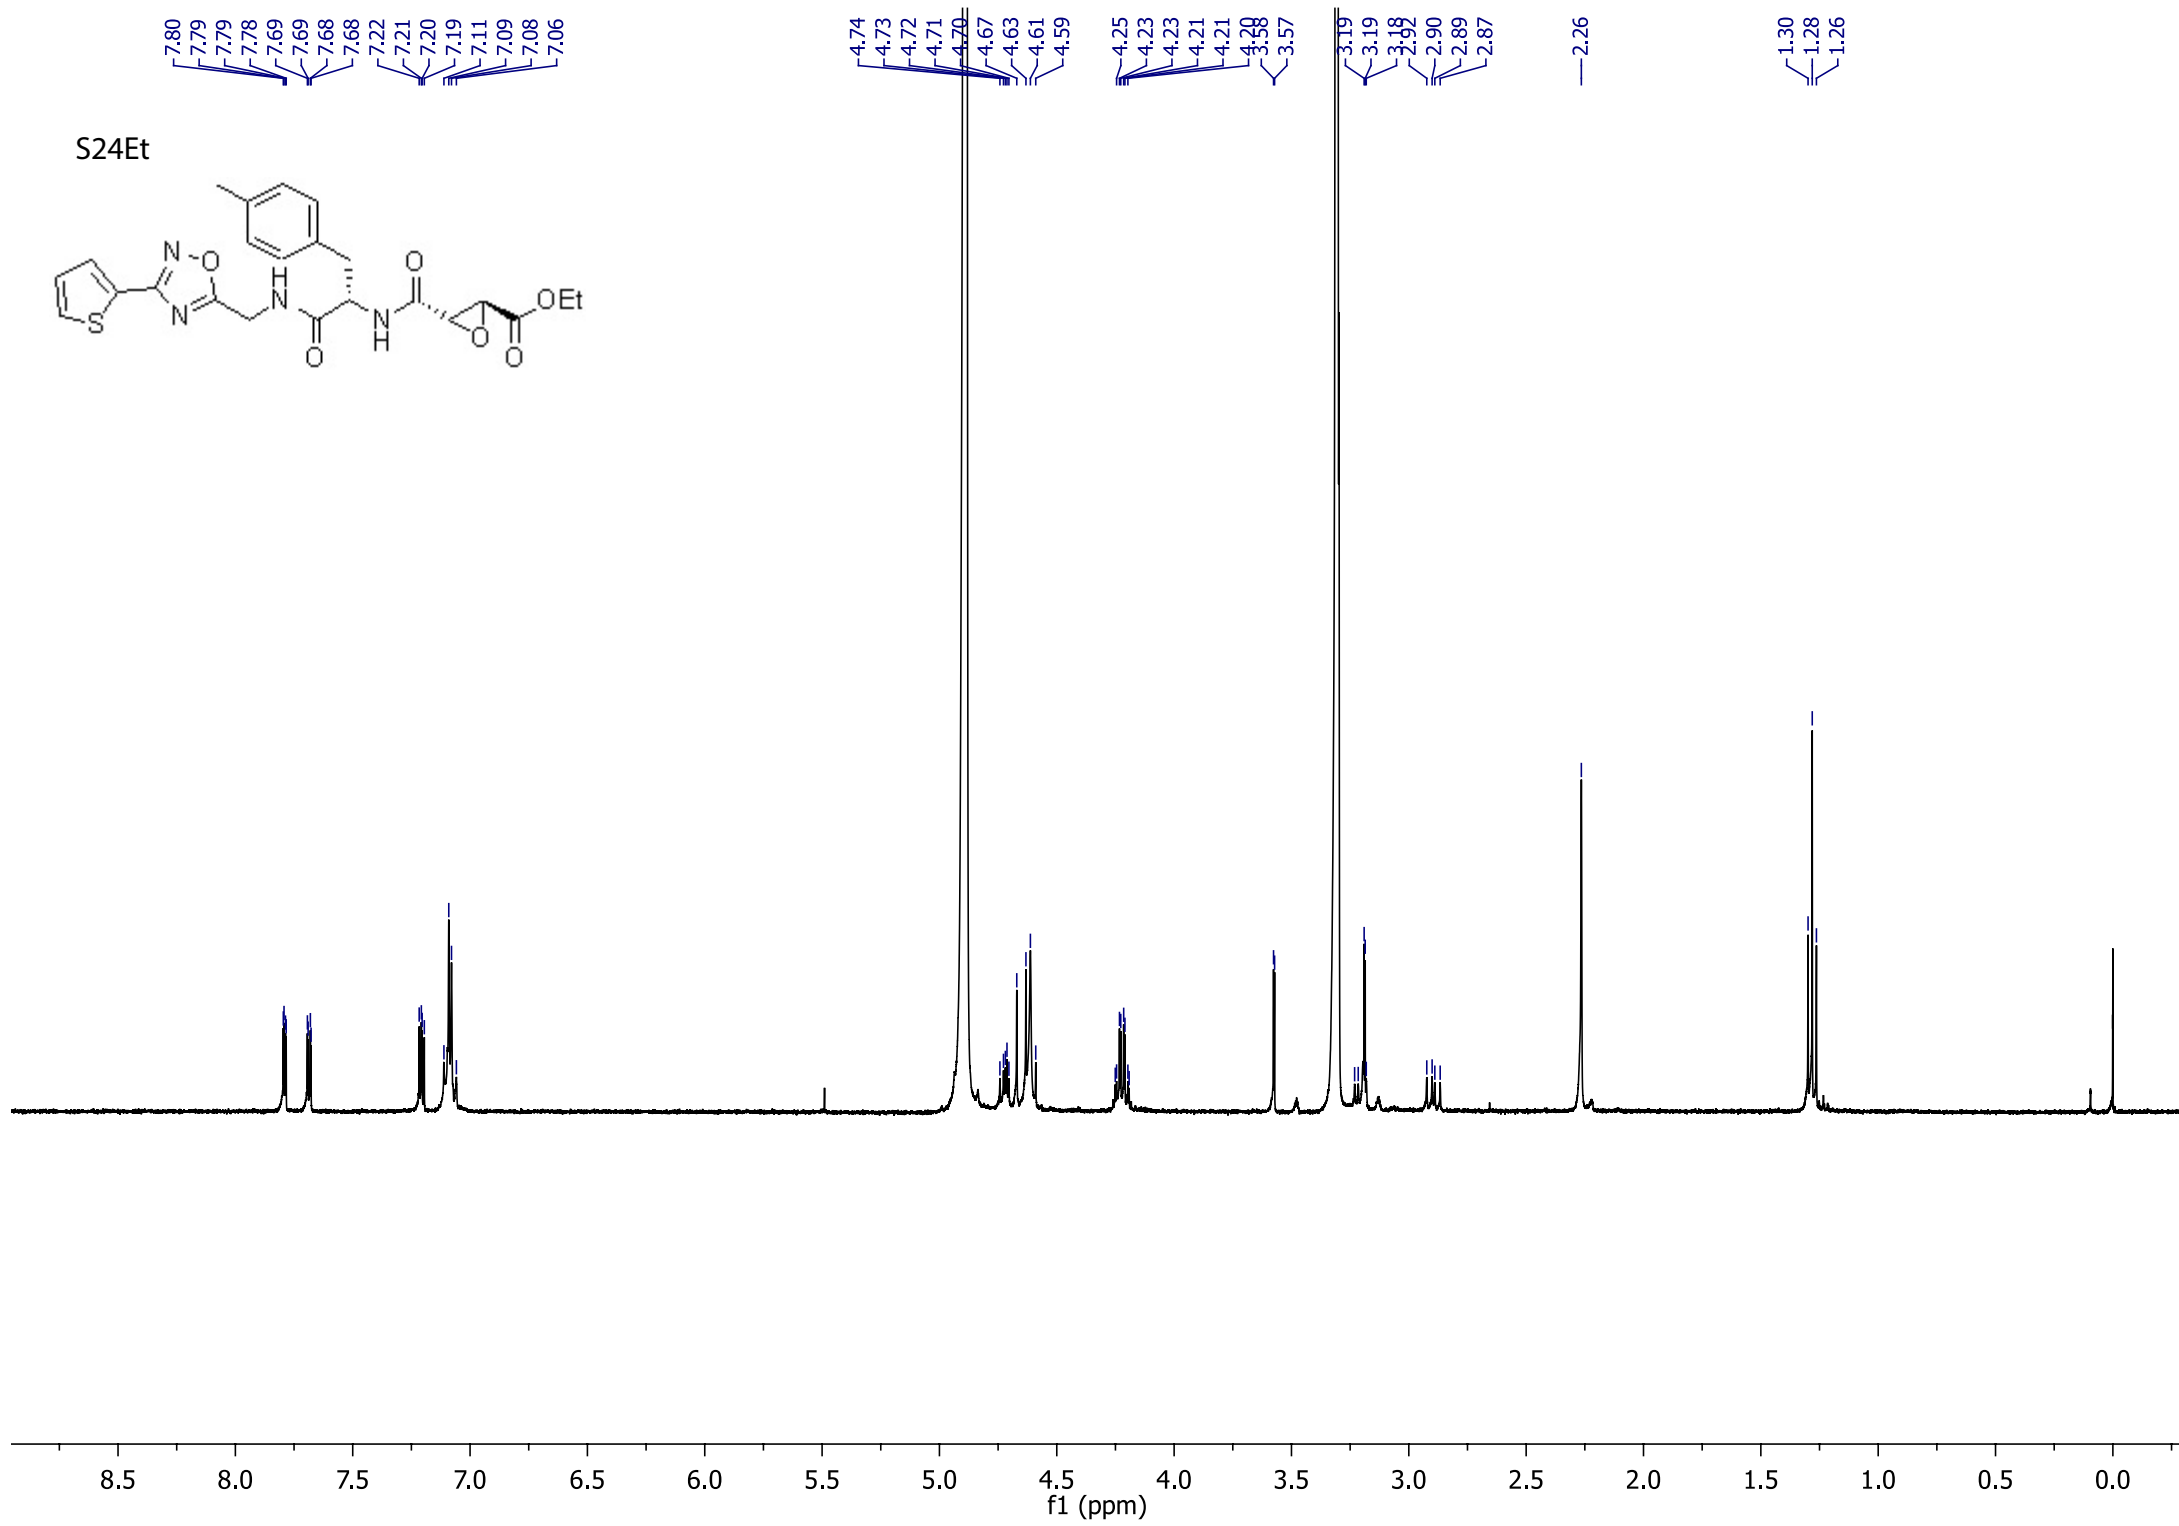



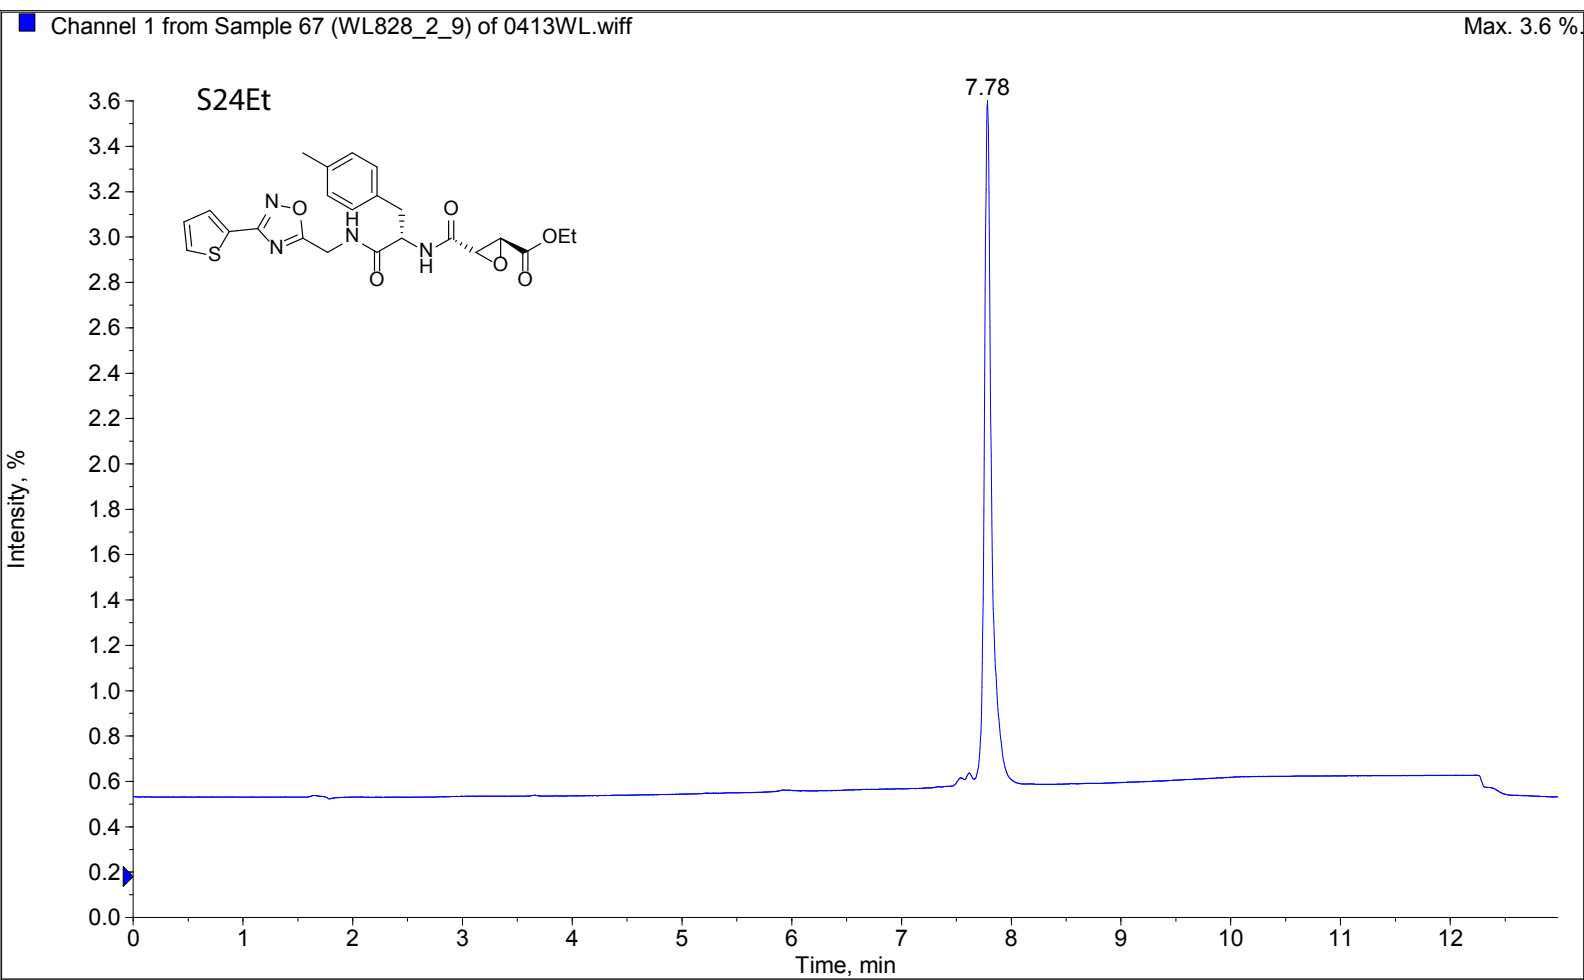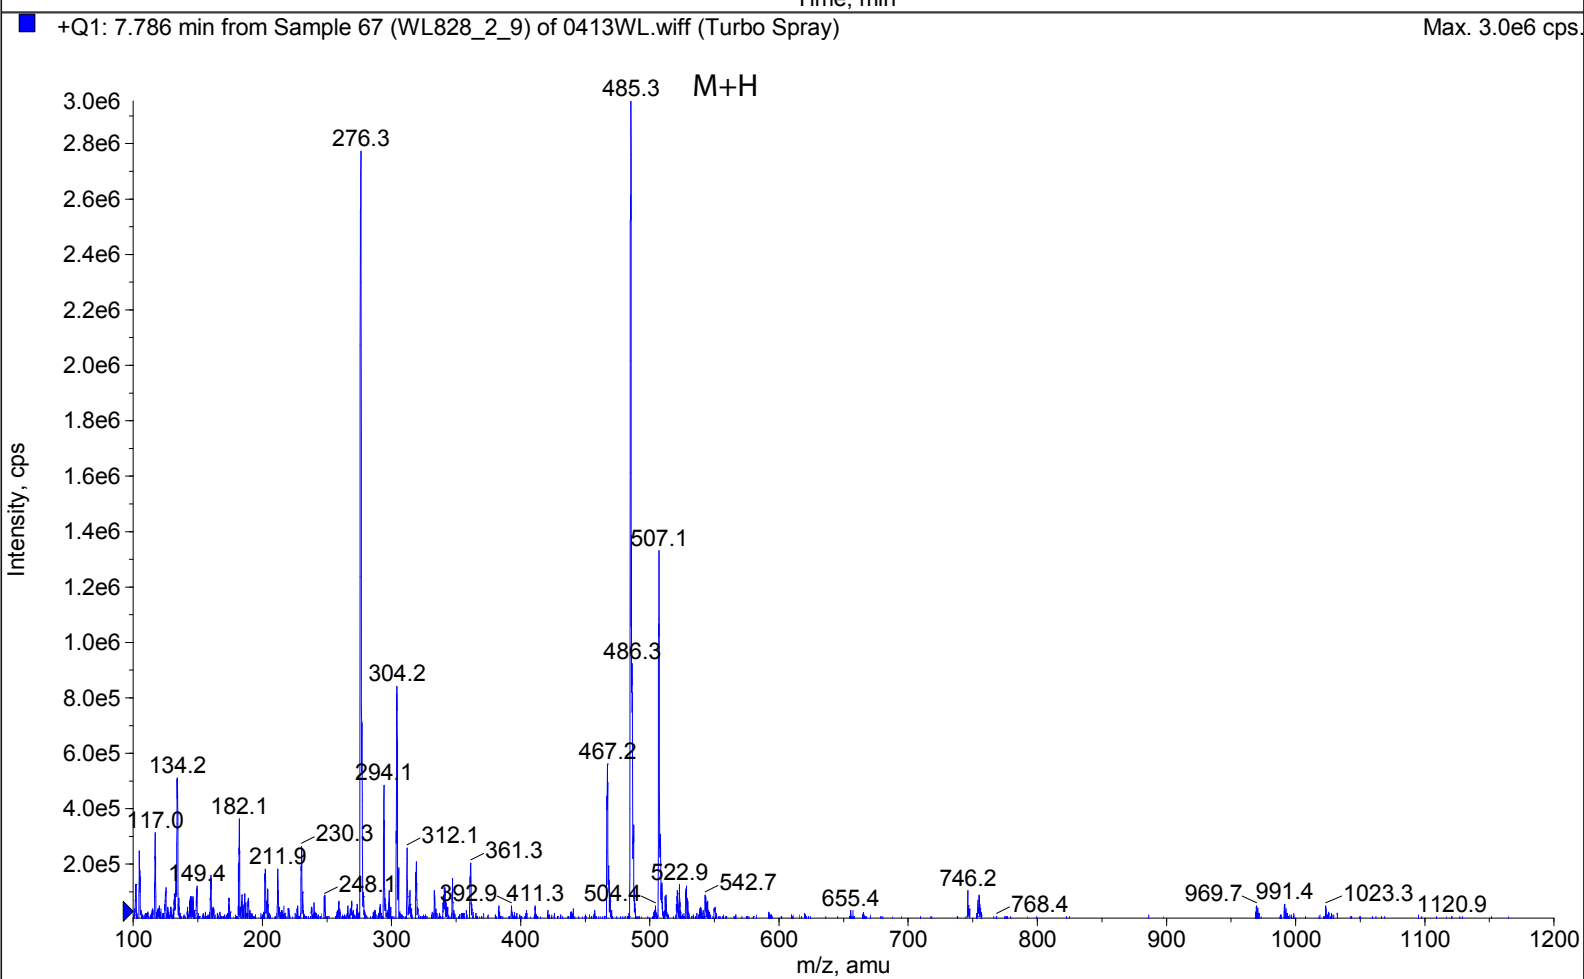

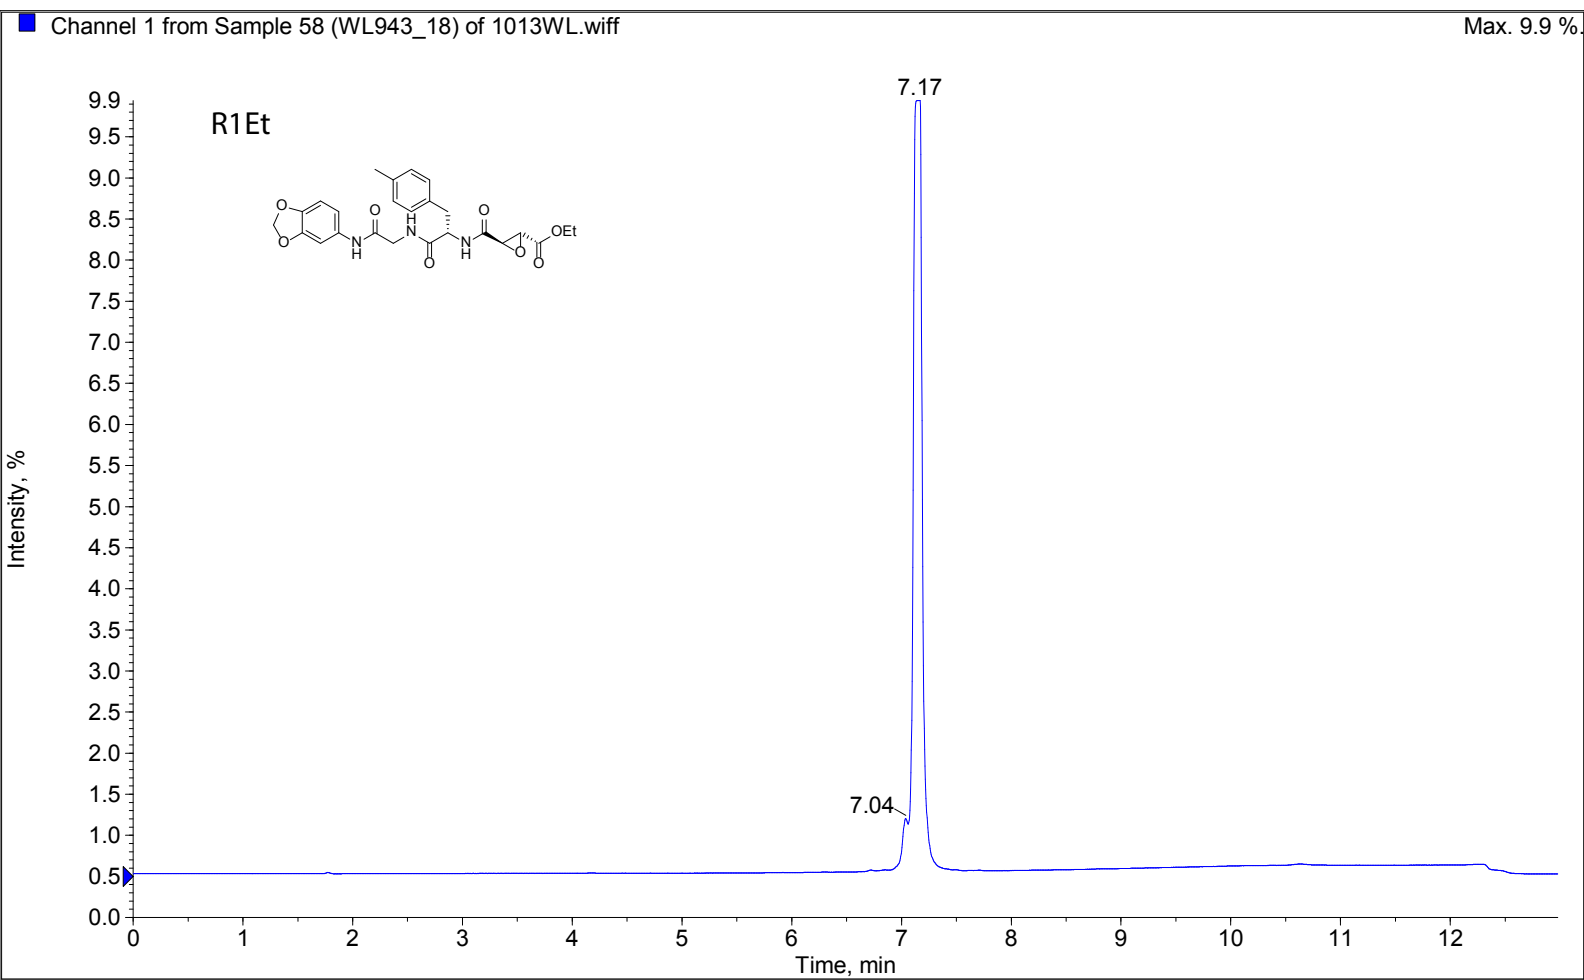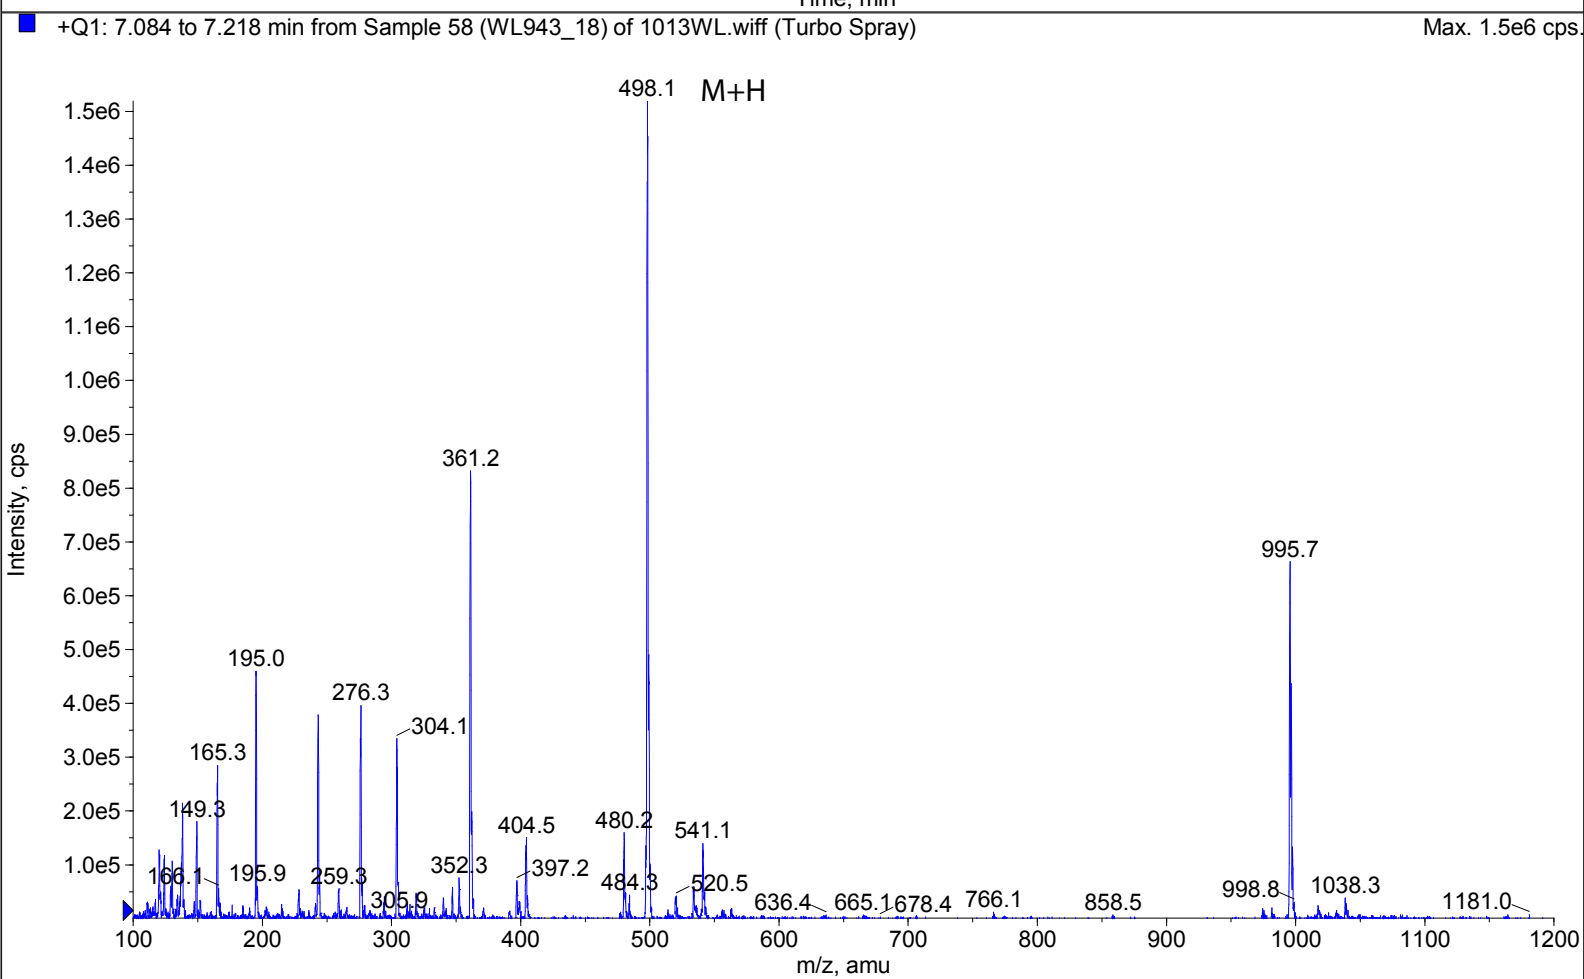

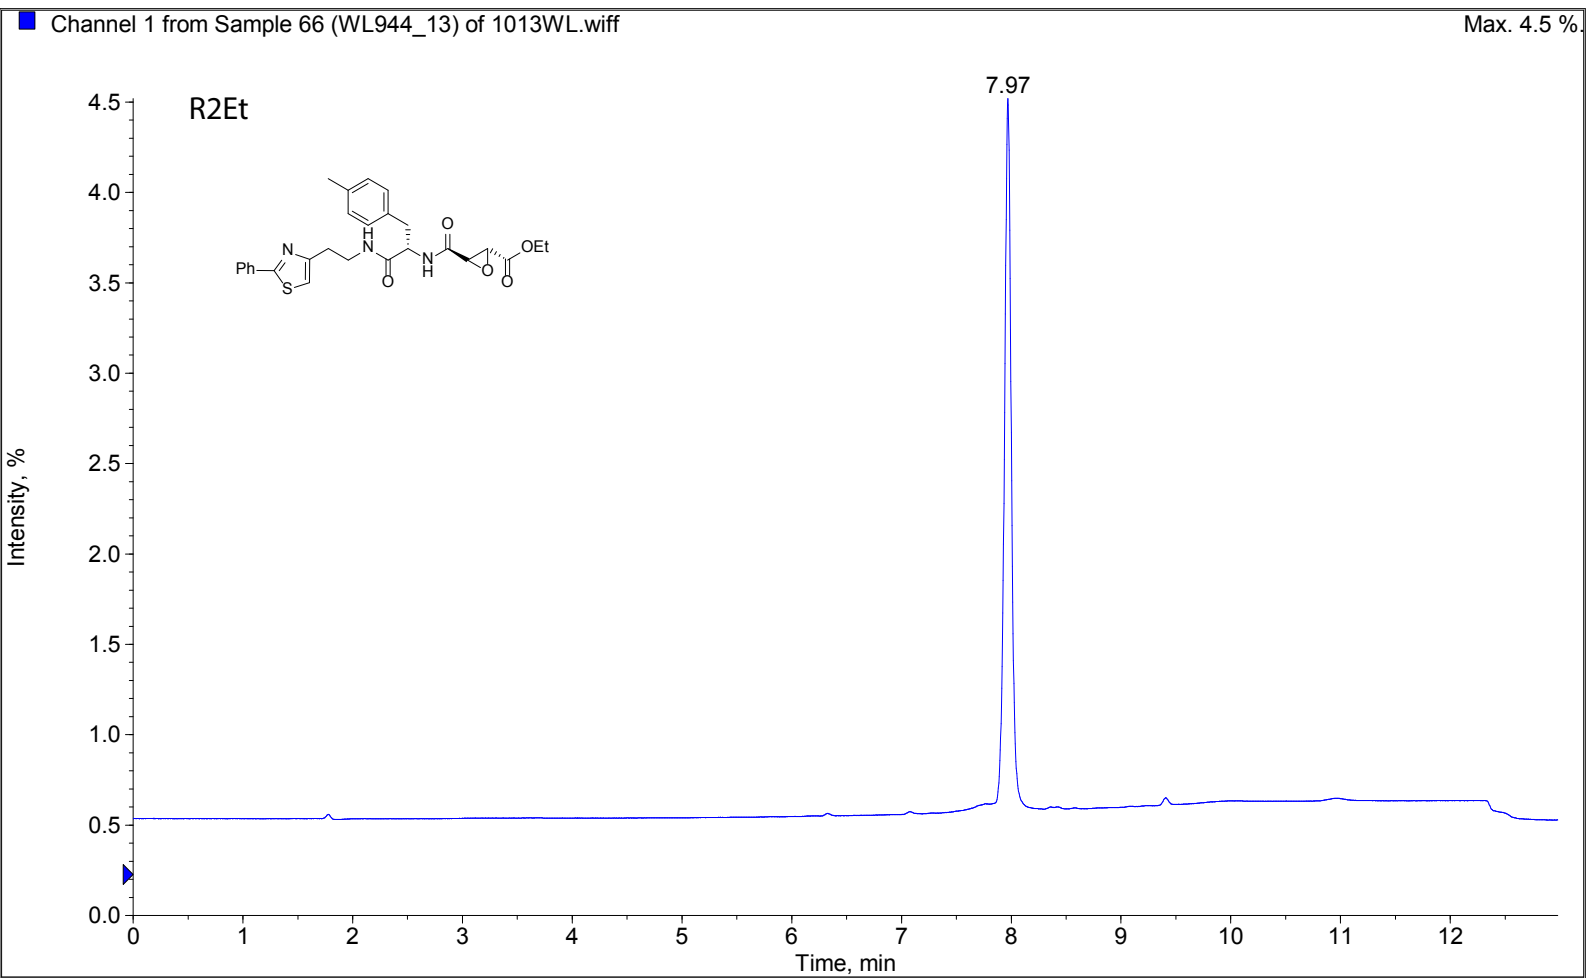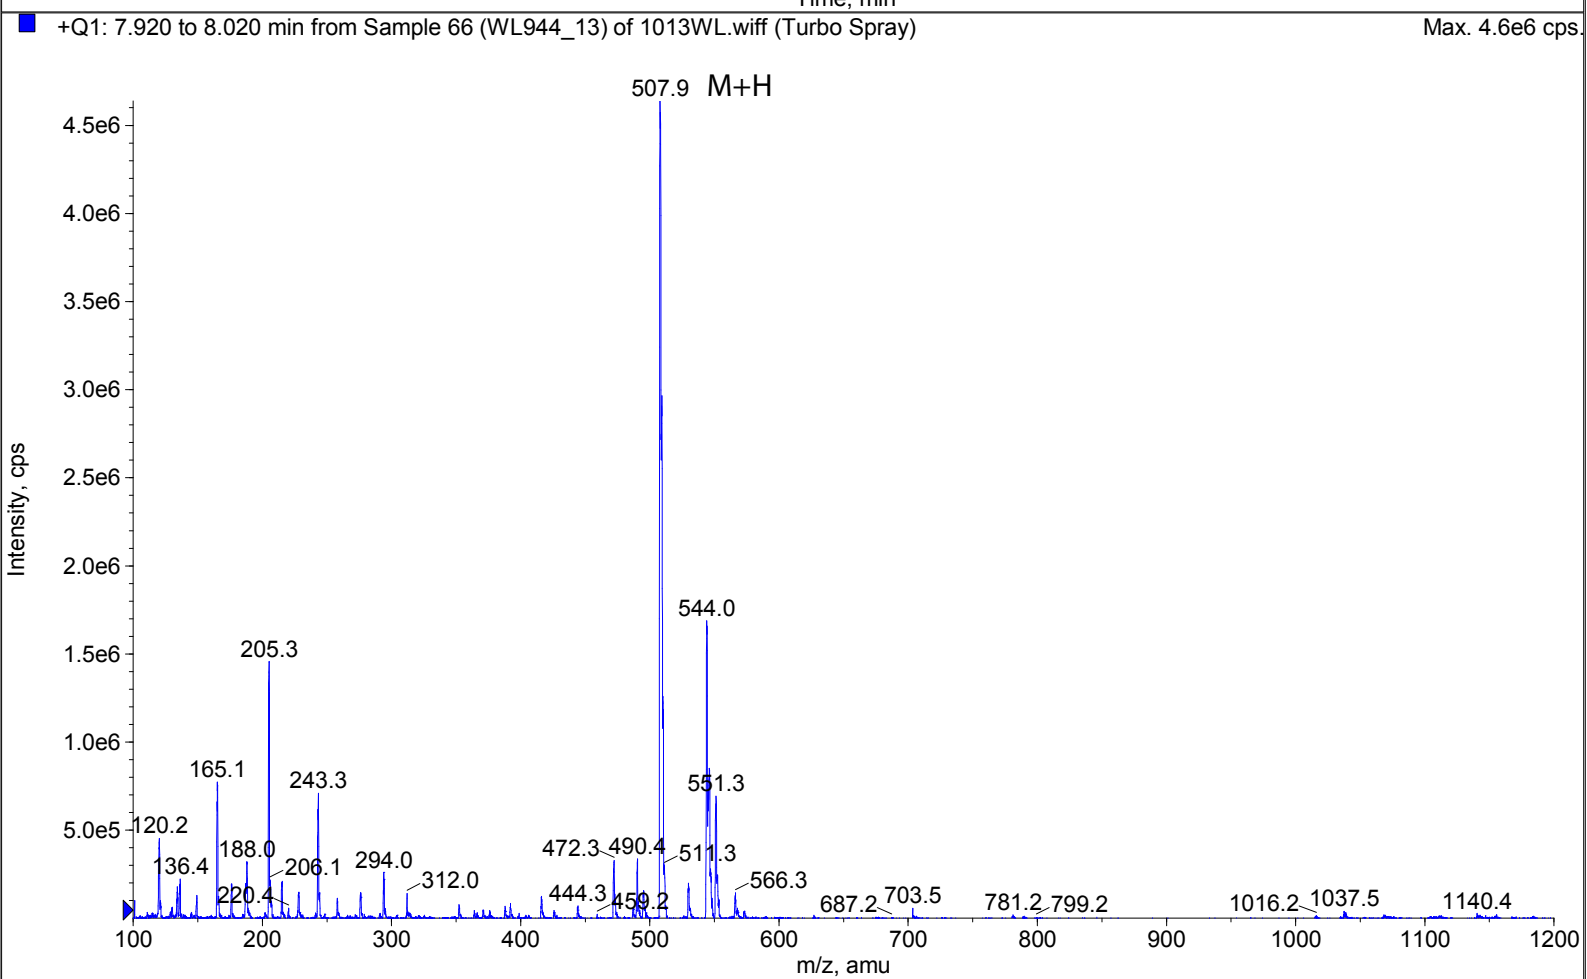

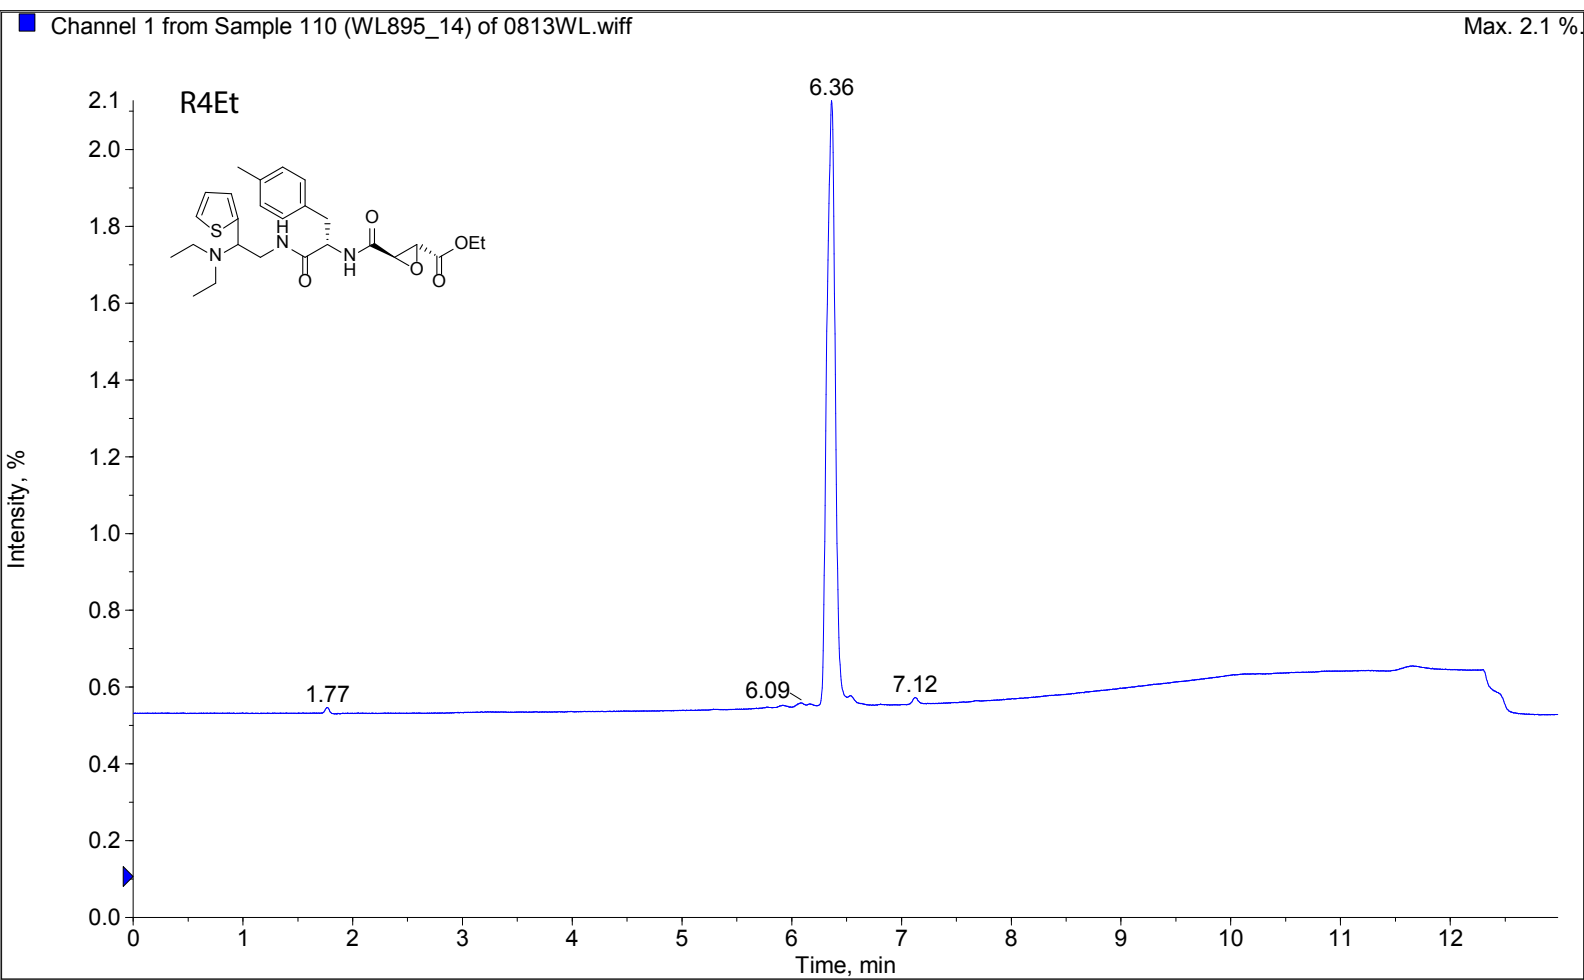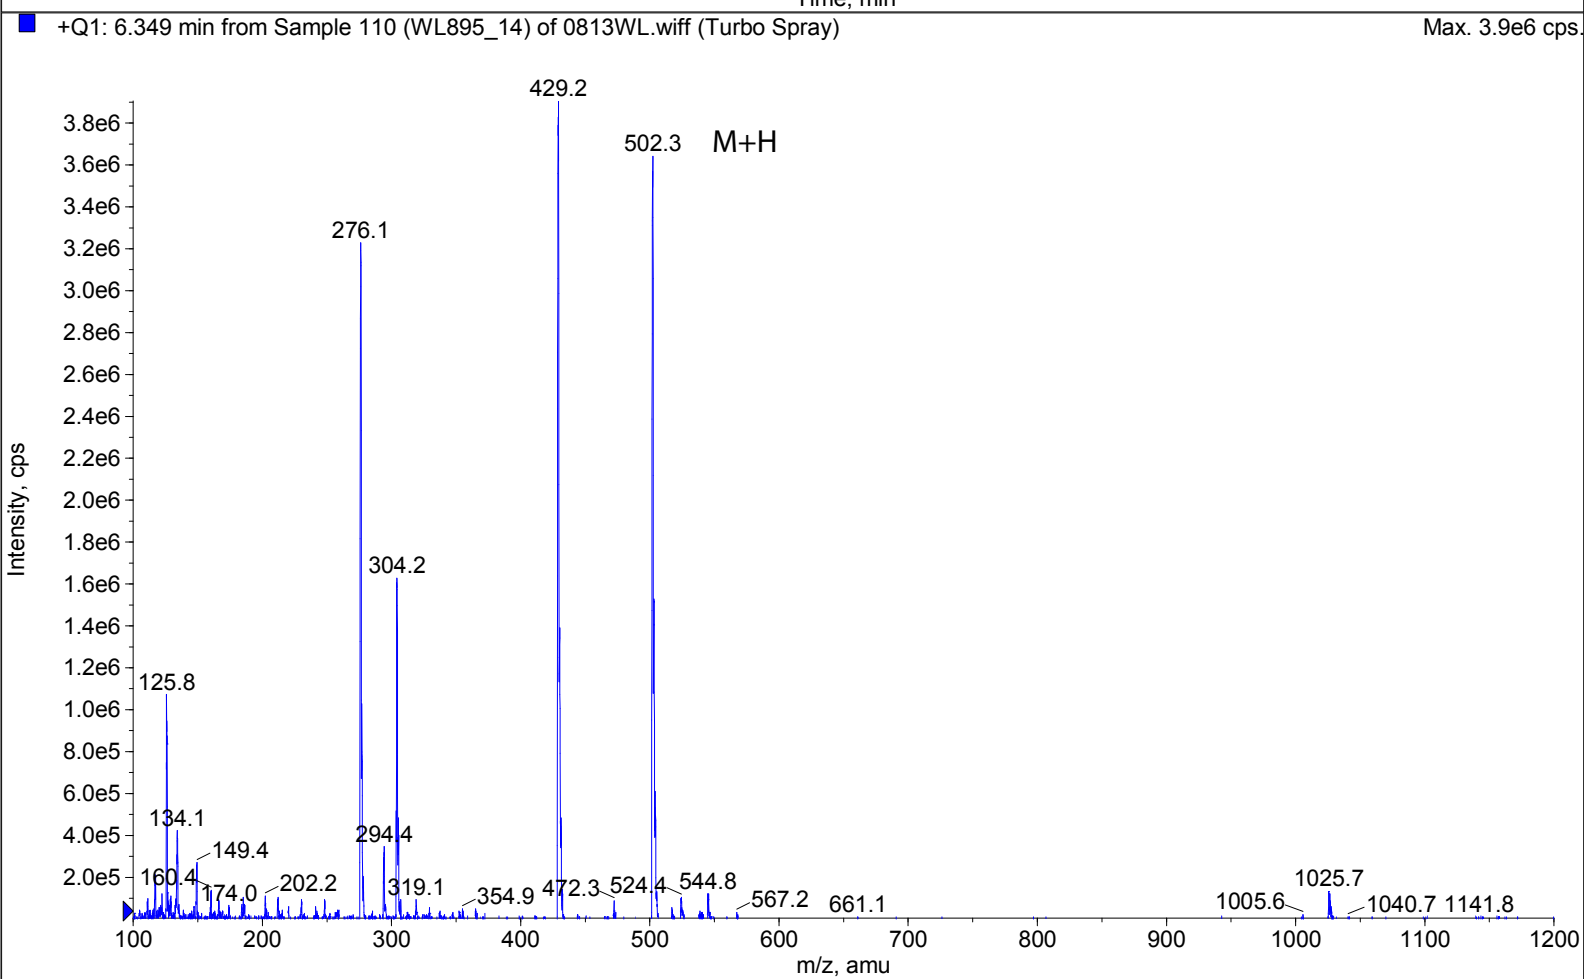

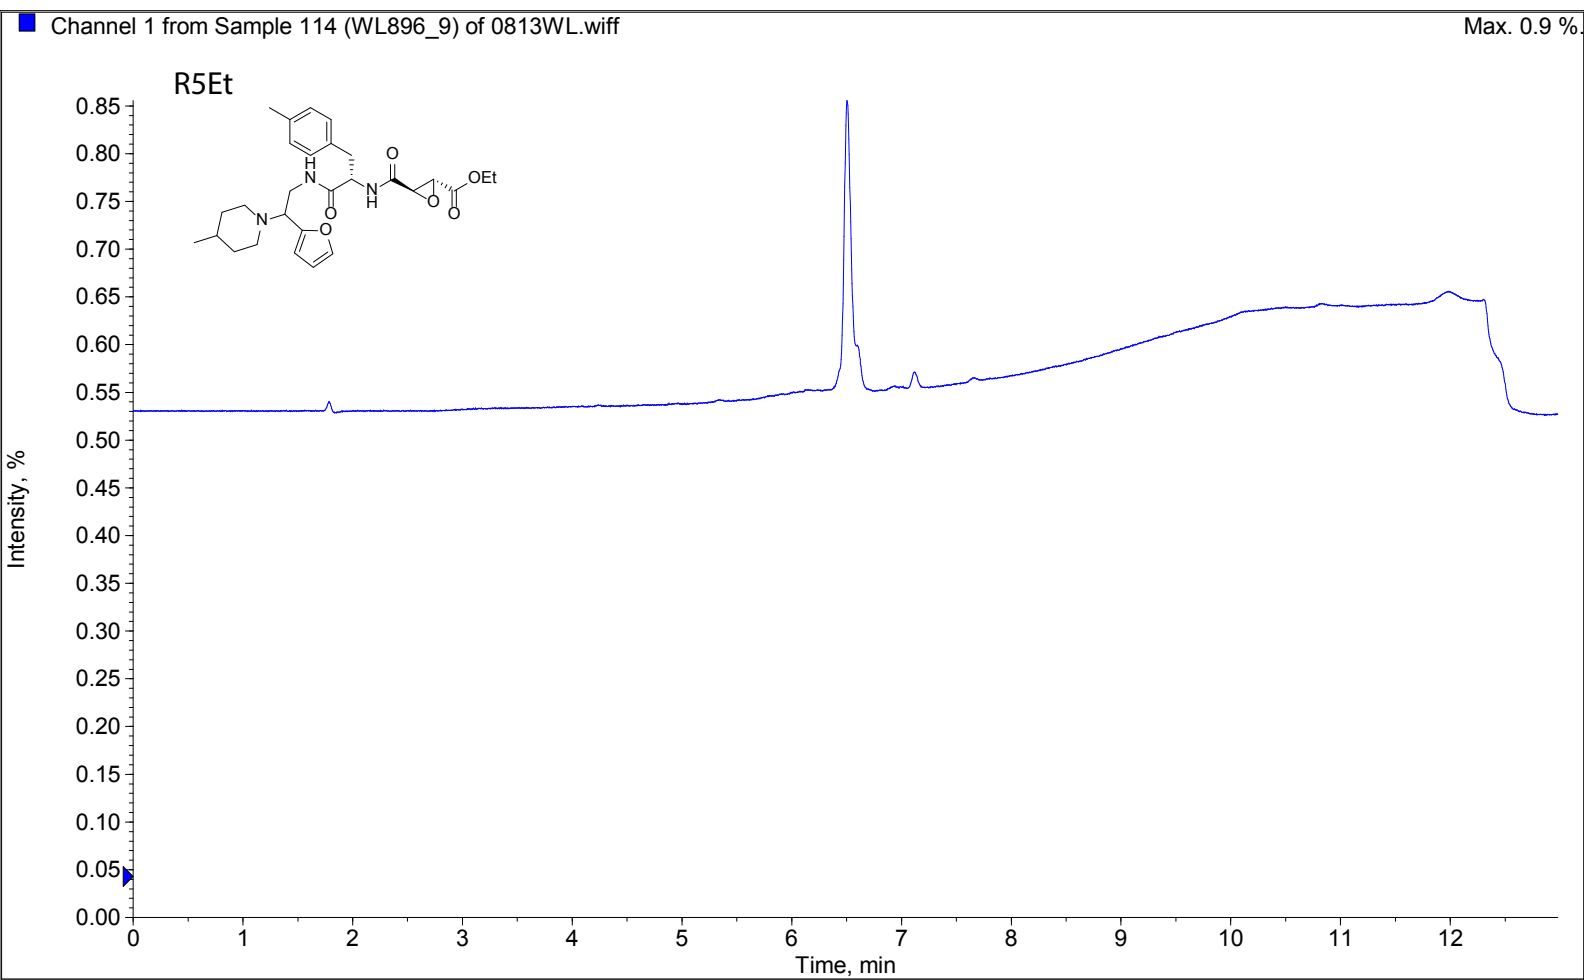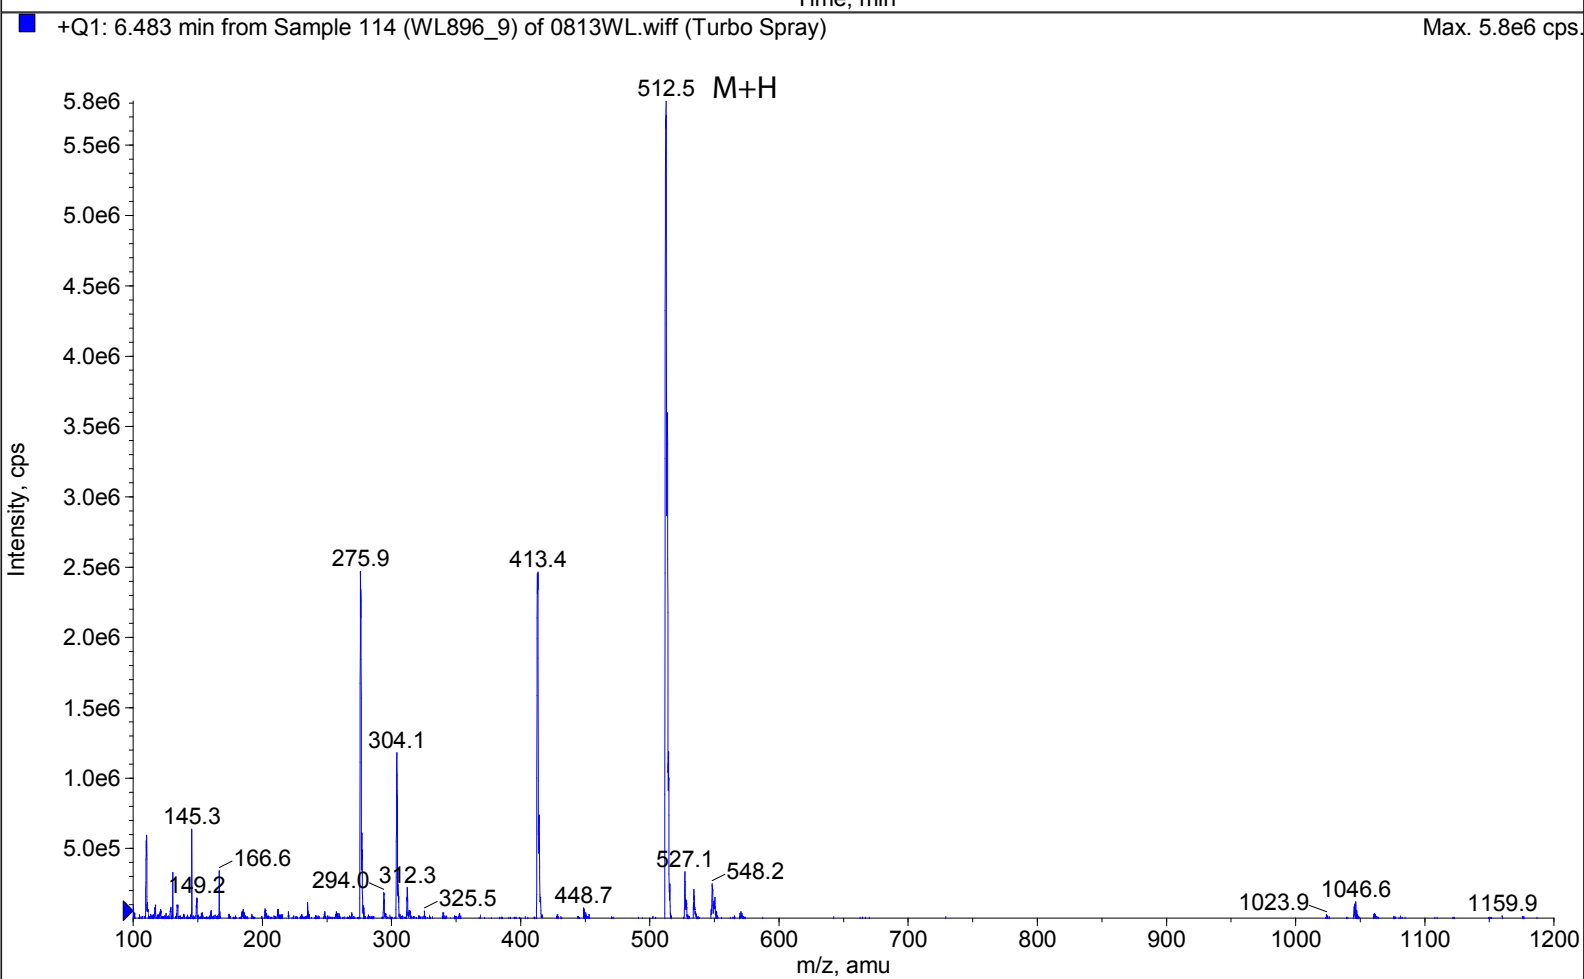

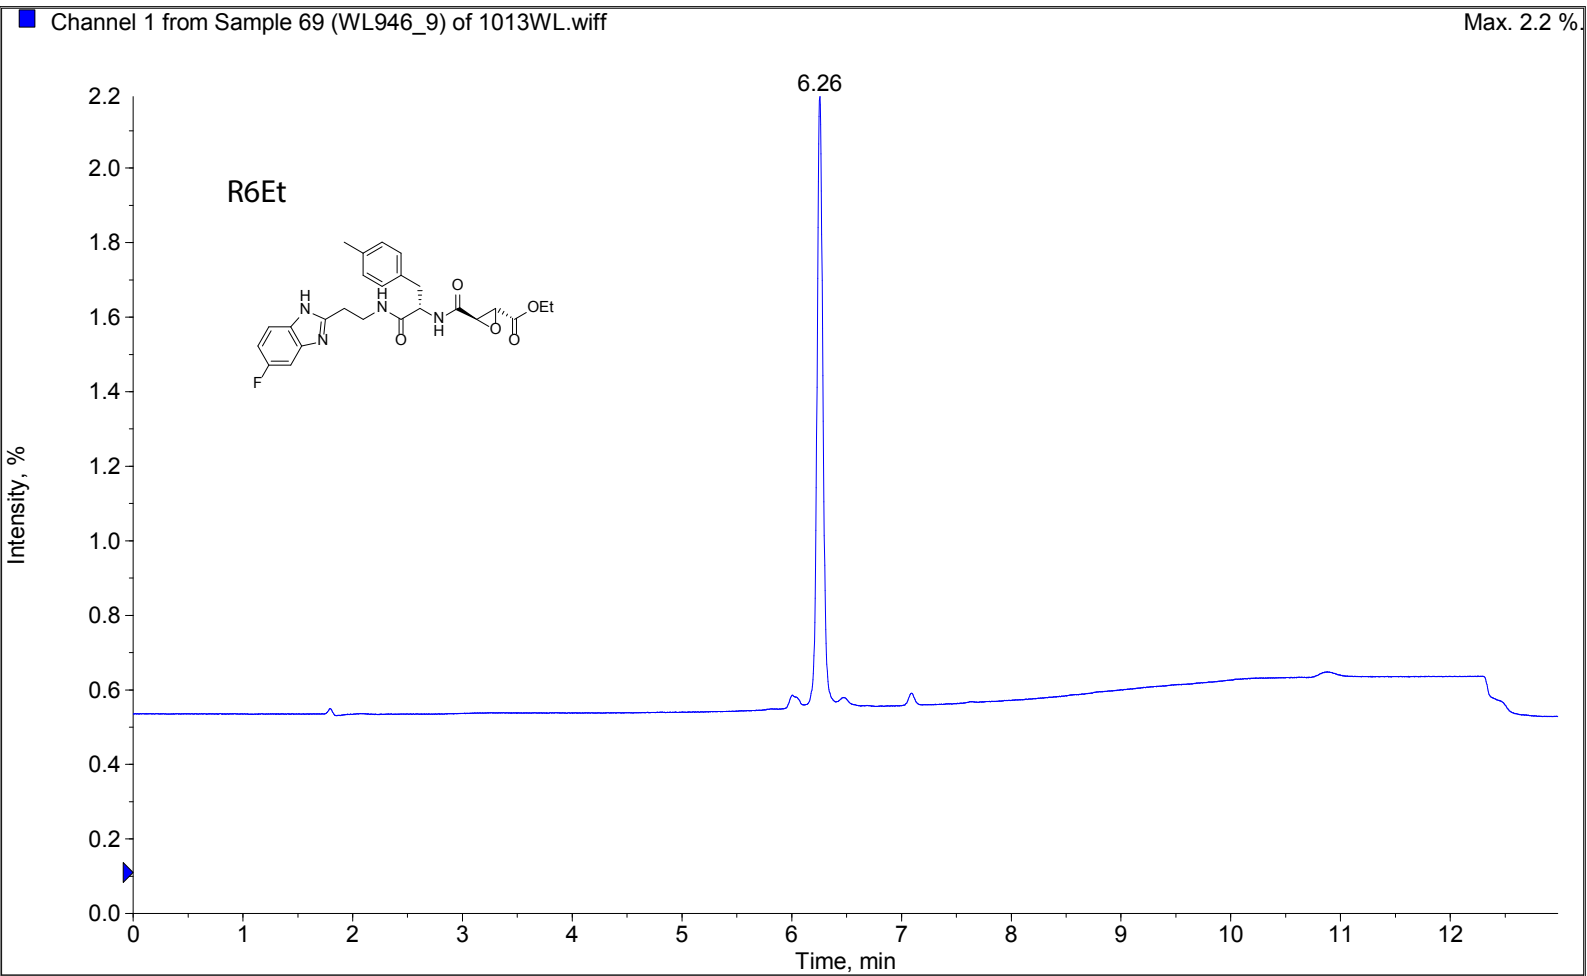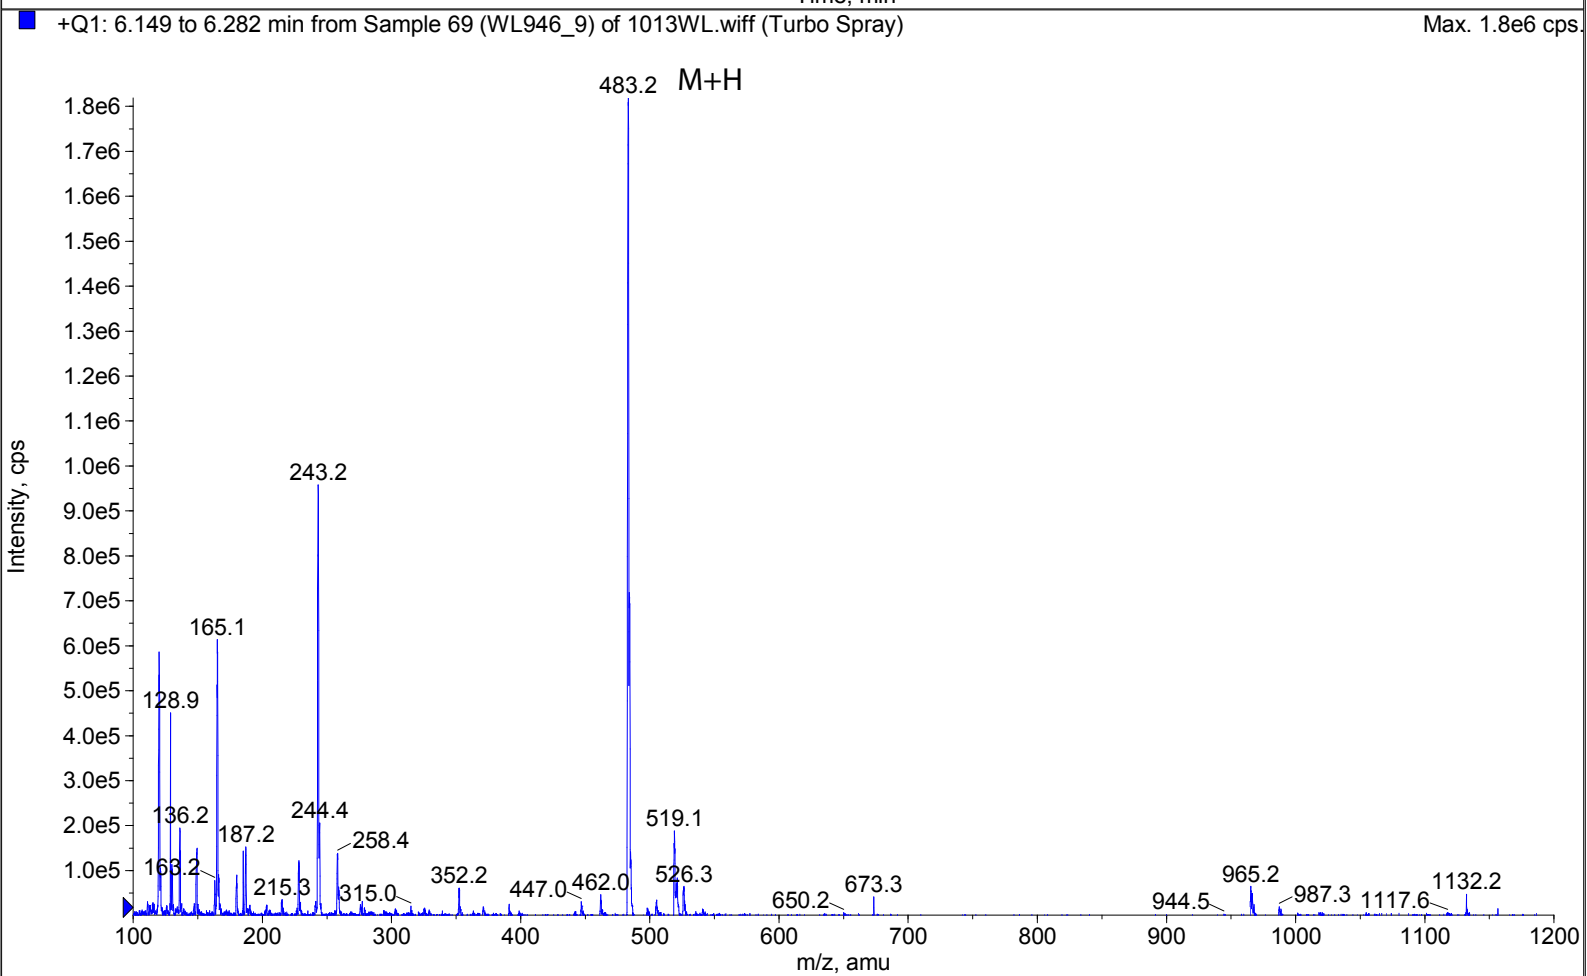

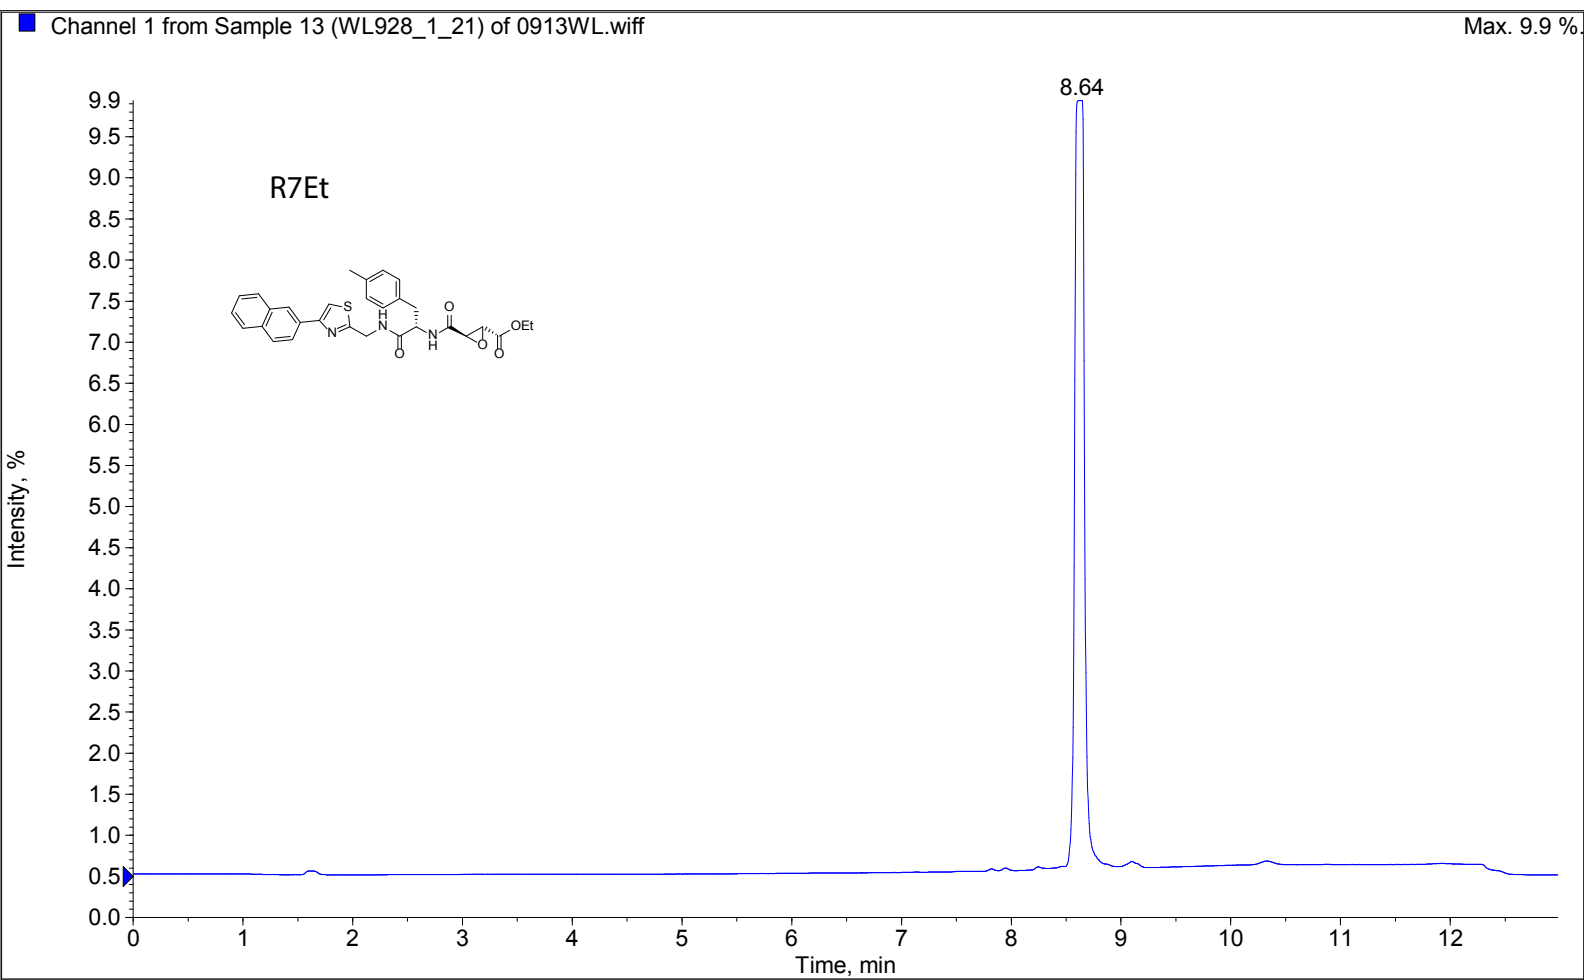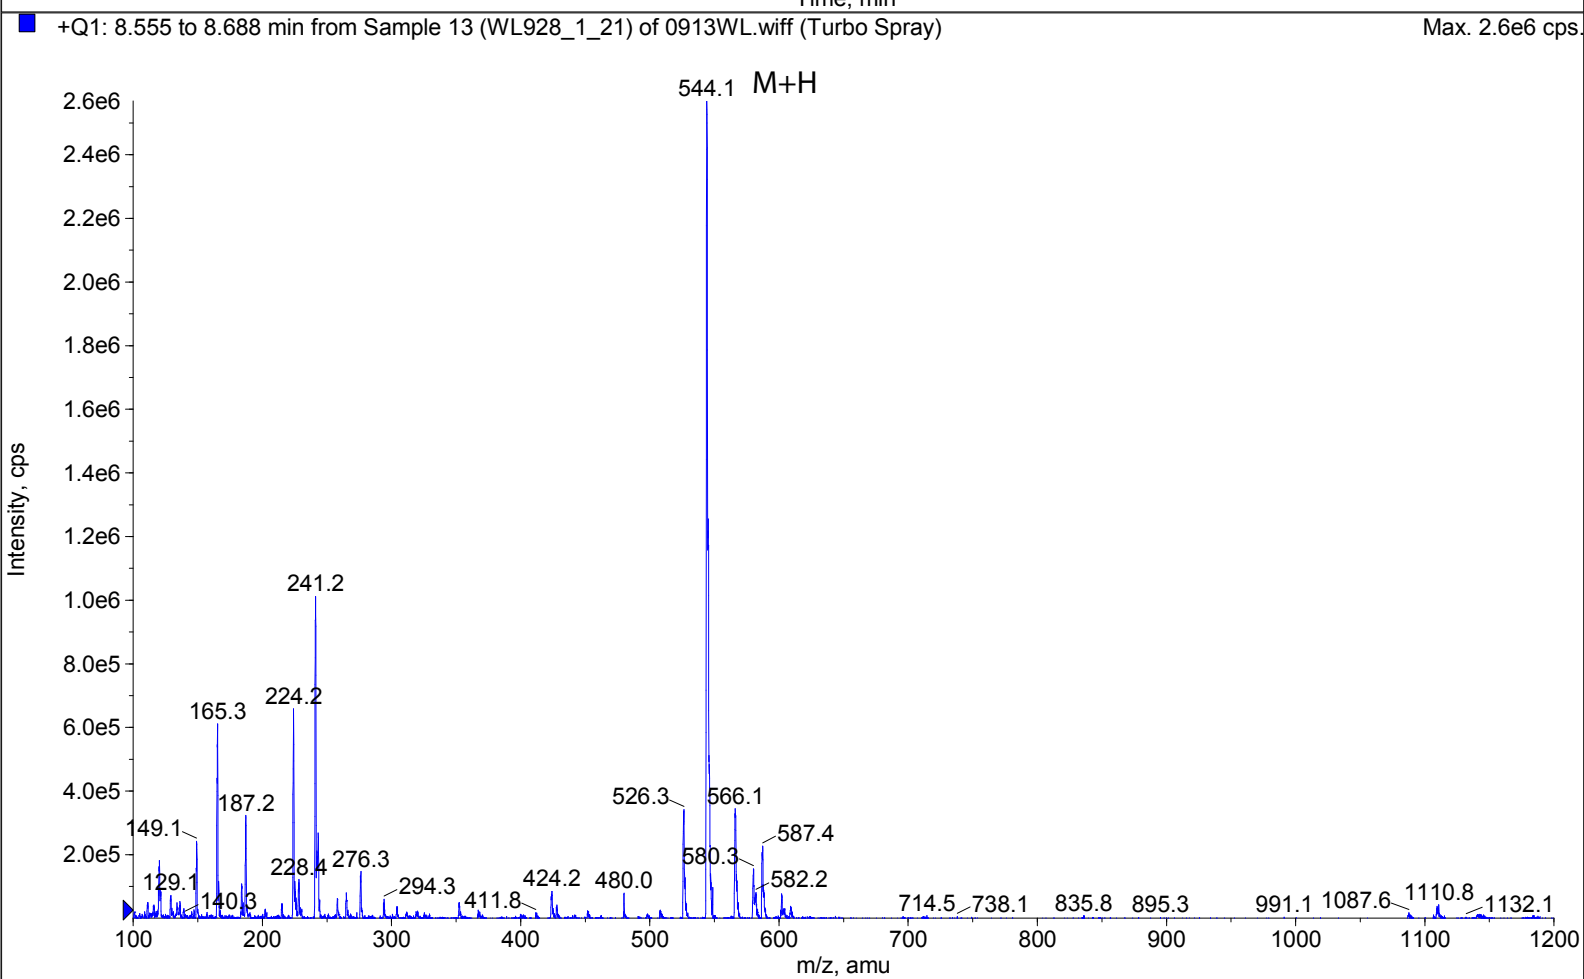

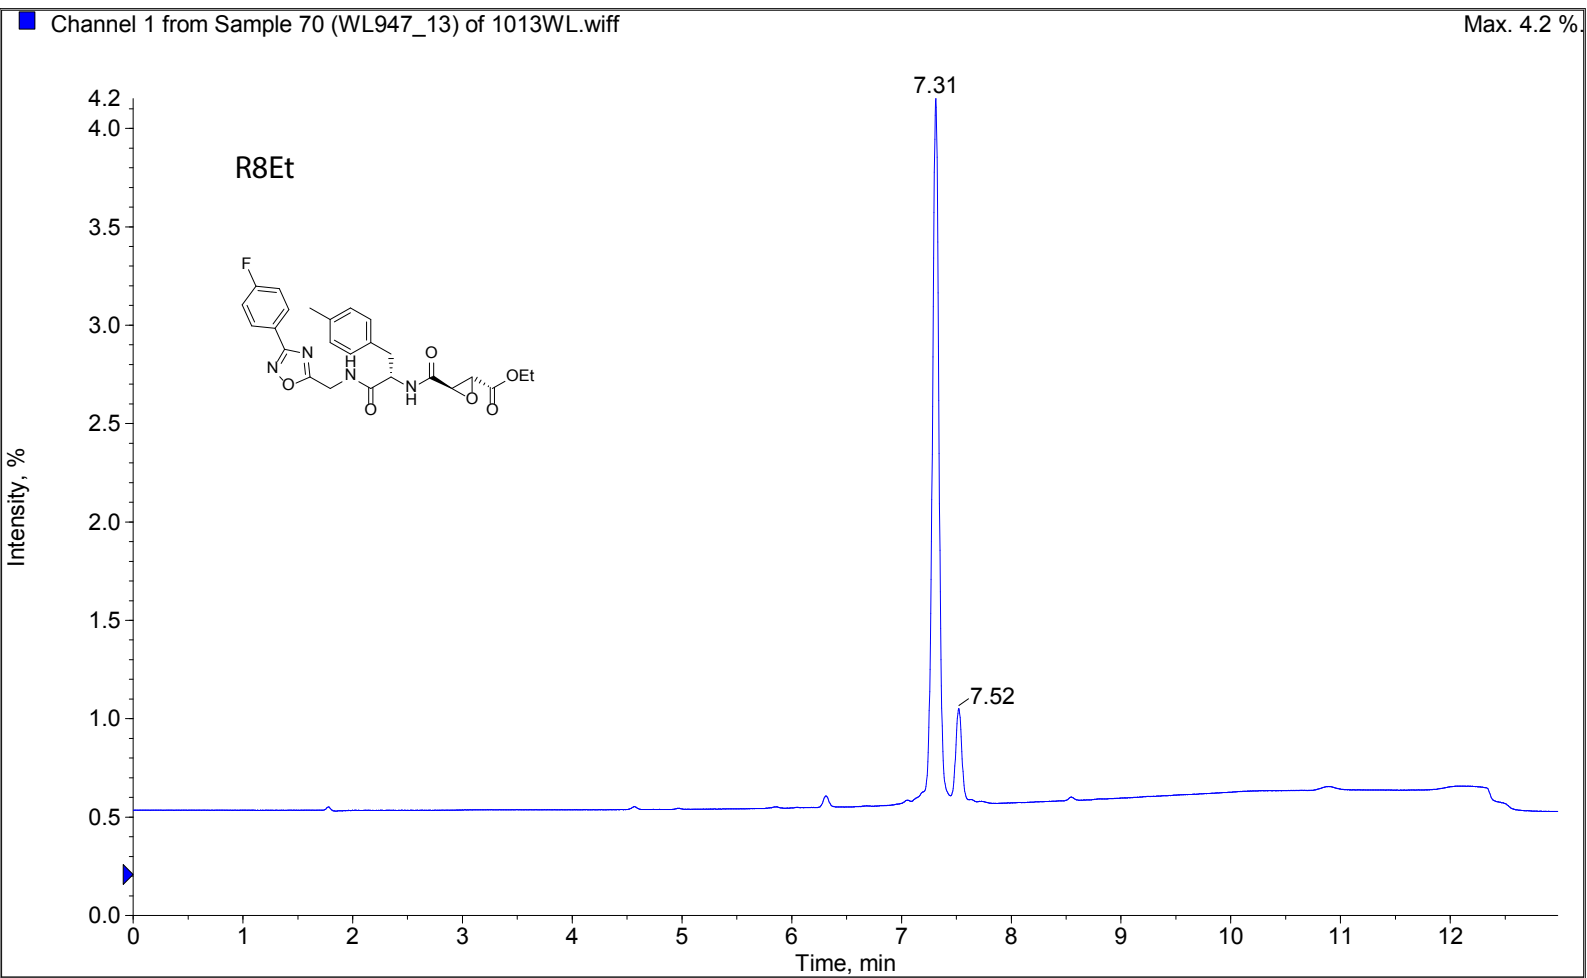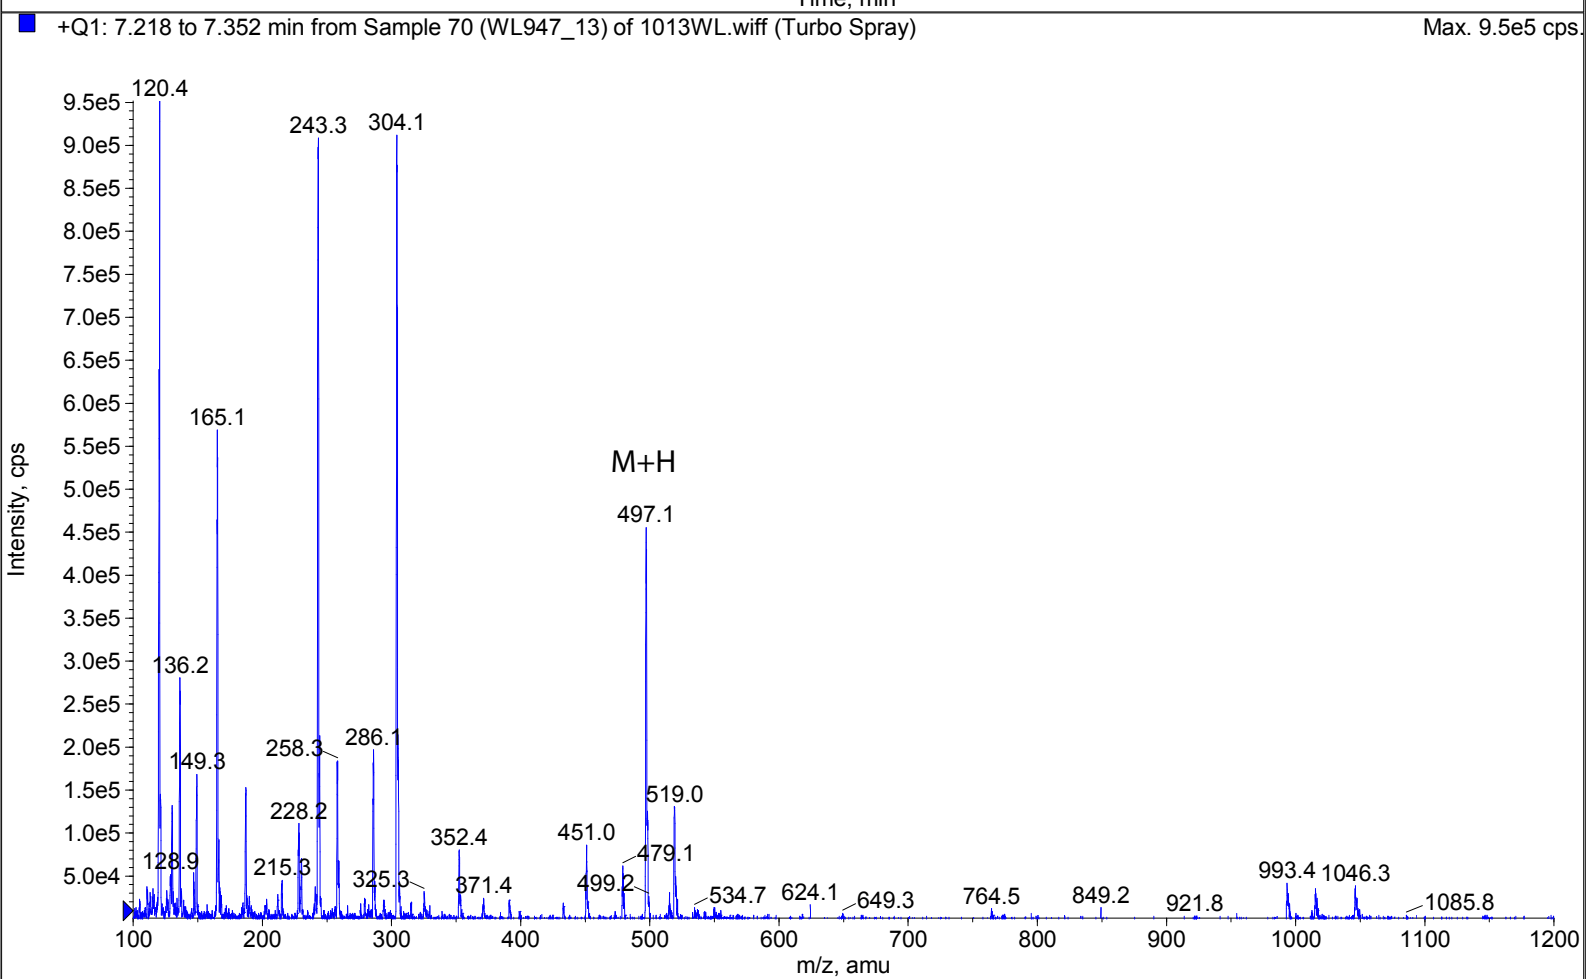



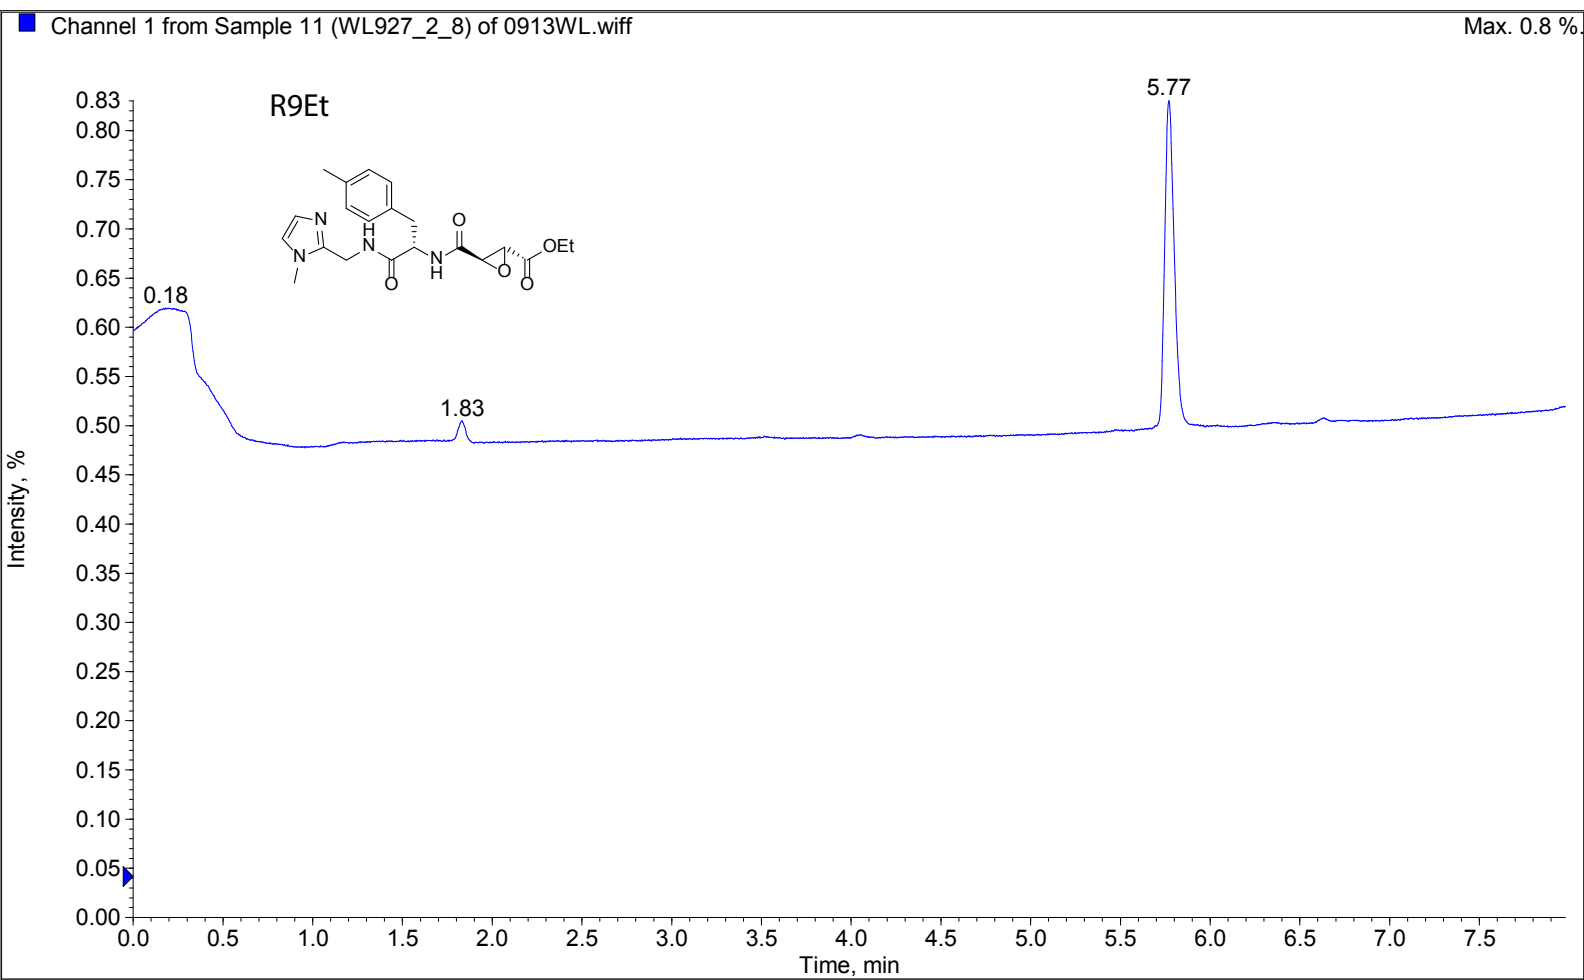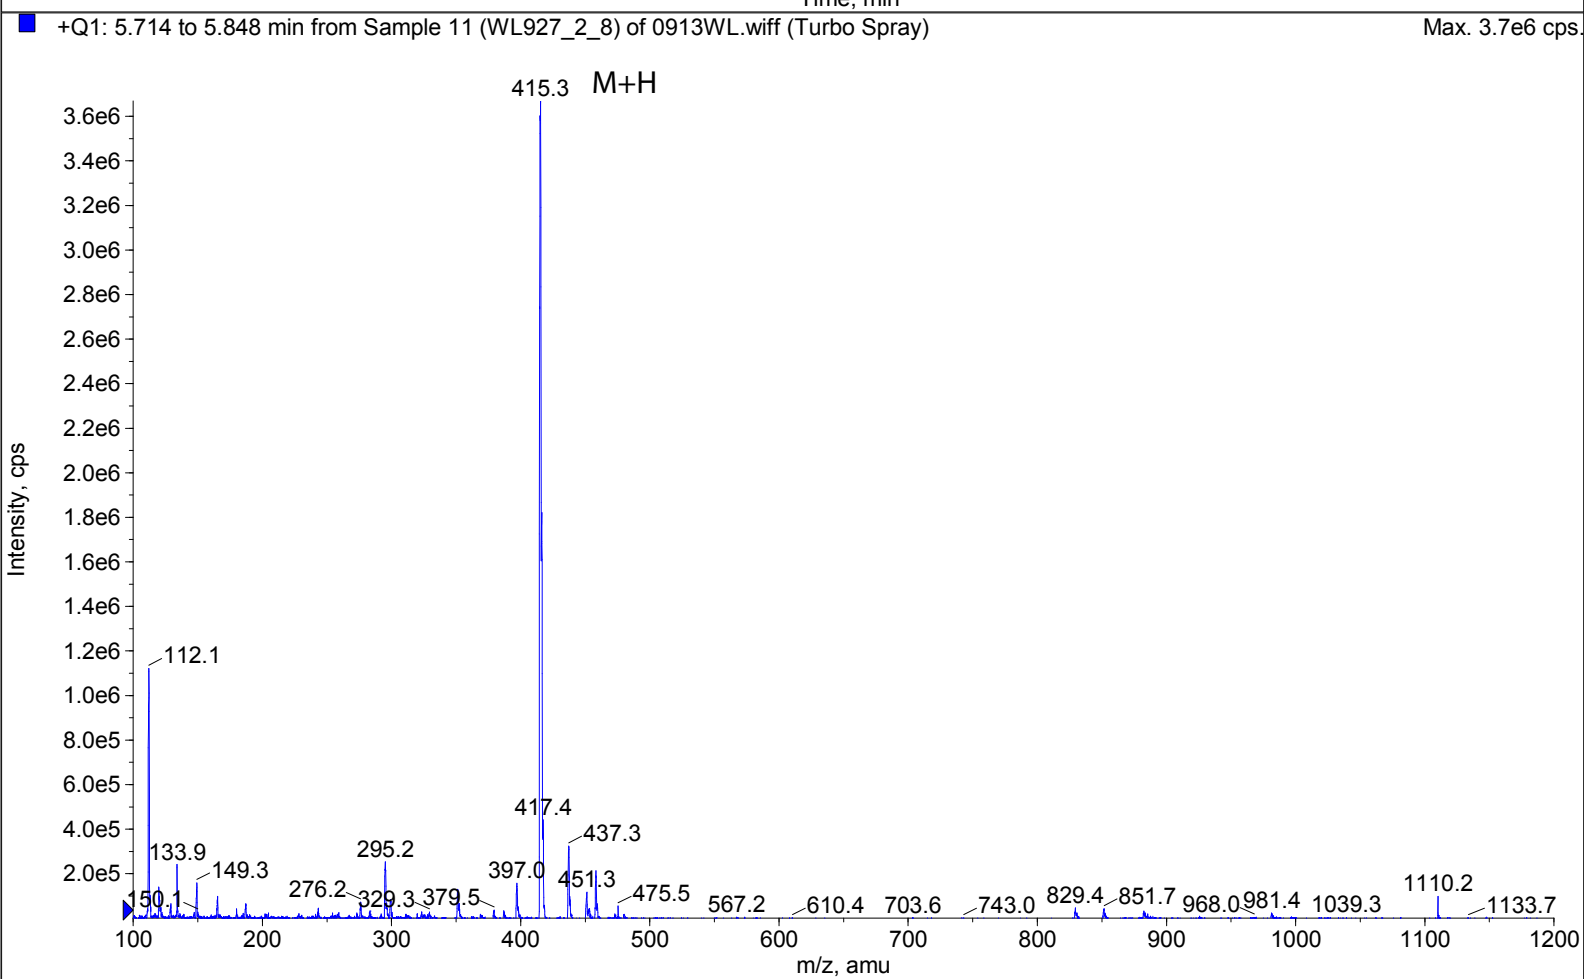

WL948H

Std proton

7.51  
7.49  
7.23  
7.21

4.59  
4.58  
4.57  
4.56  
4.24  
4.22  
4.20  
4.19

3.47  
3.34  
3.12  
2.95  
2.94  
2.90  
2.89  
2.87  
2.85  
2.80  
2.78  
2.76  
2.75  
2.35

1.29  
1.28  
1.26

R10Et

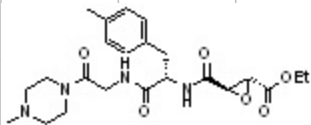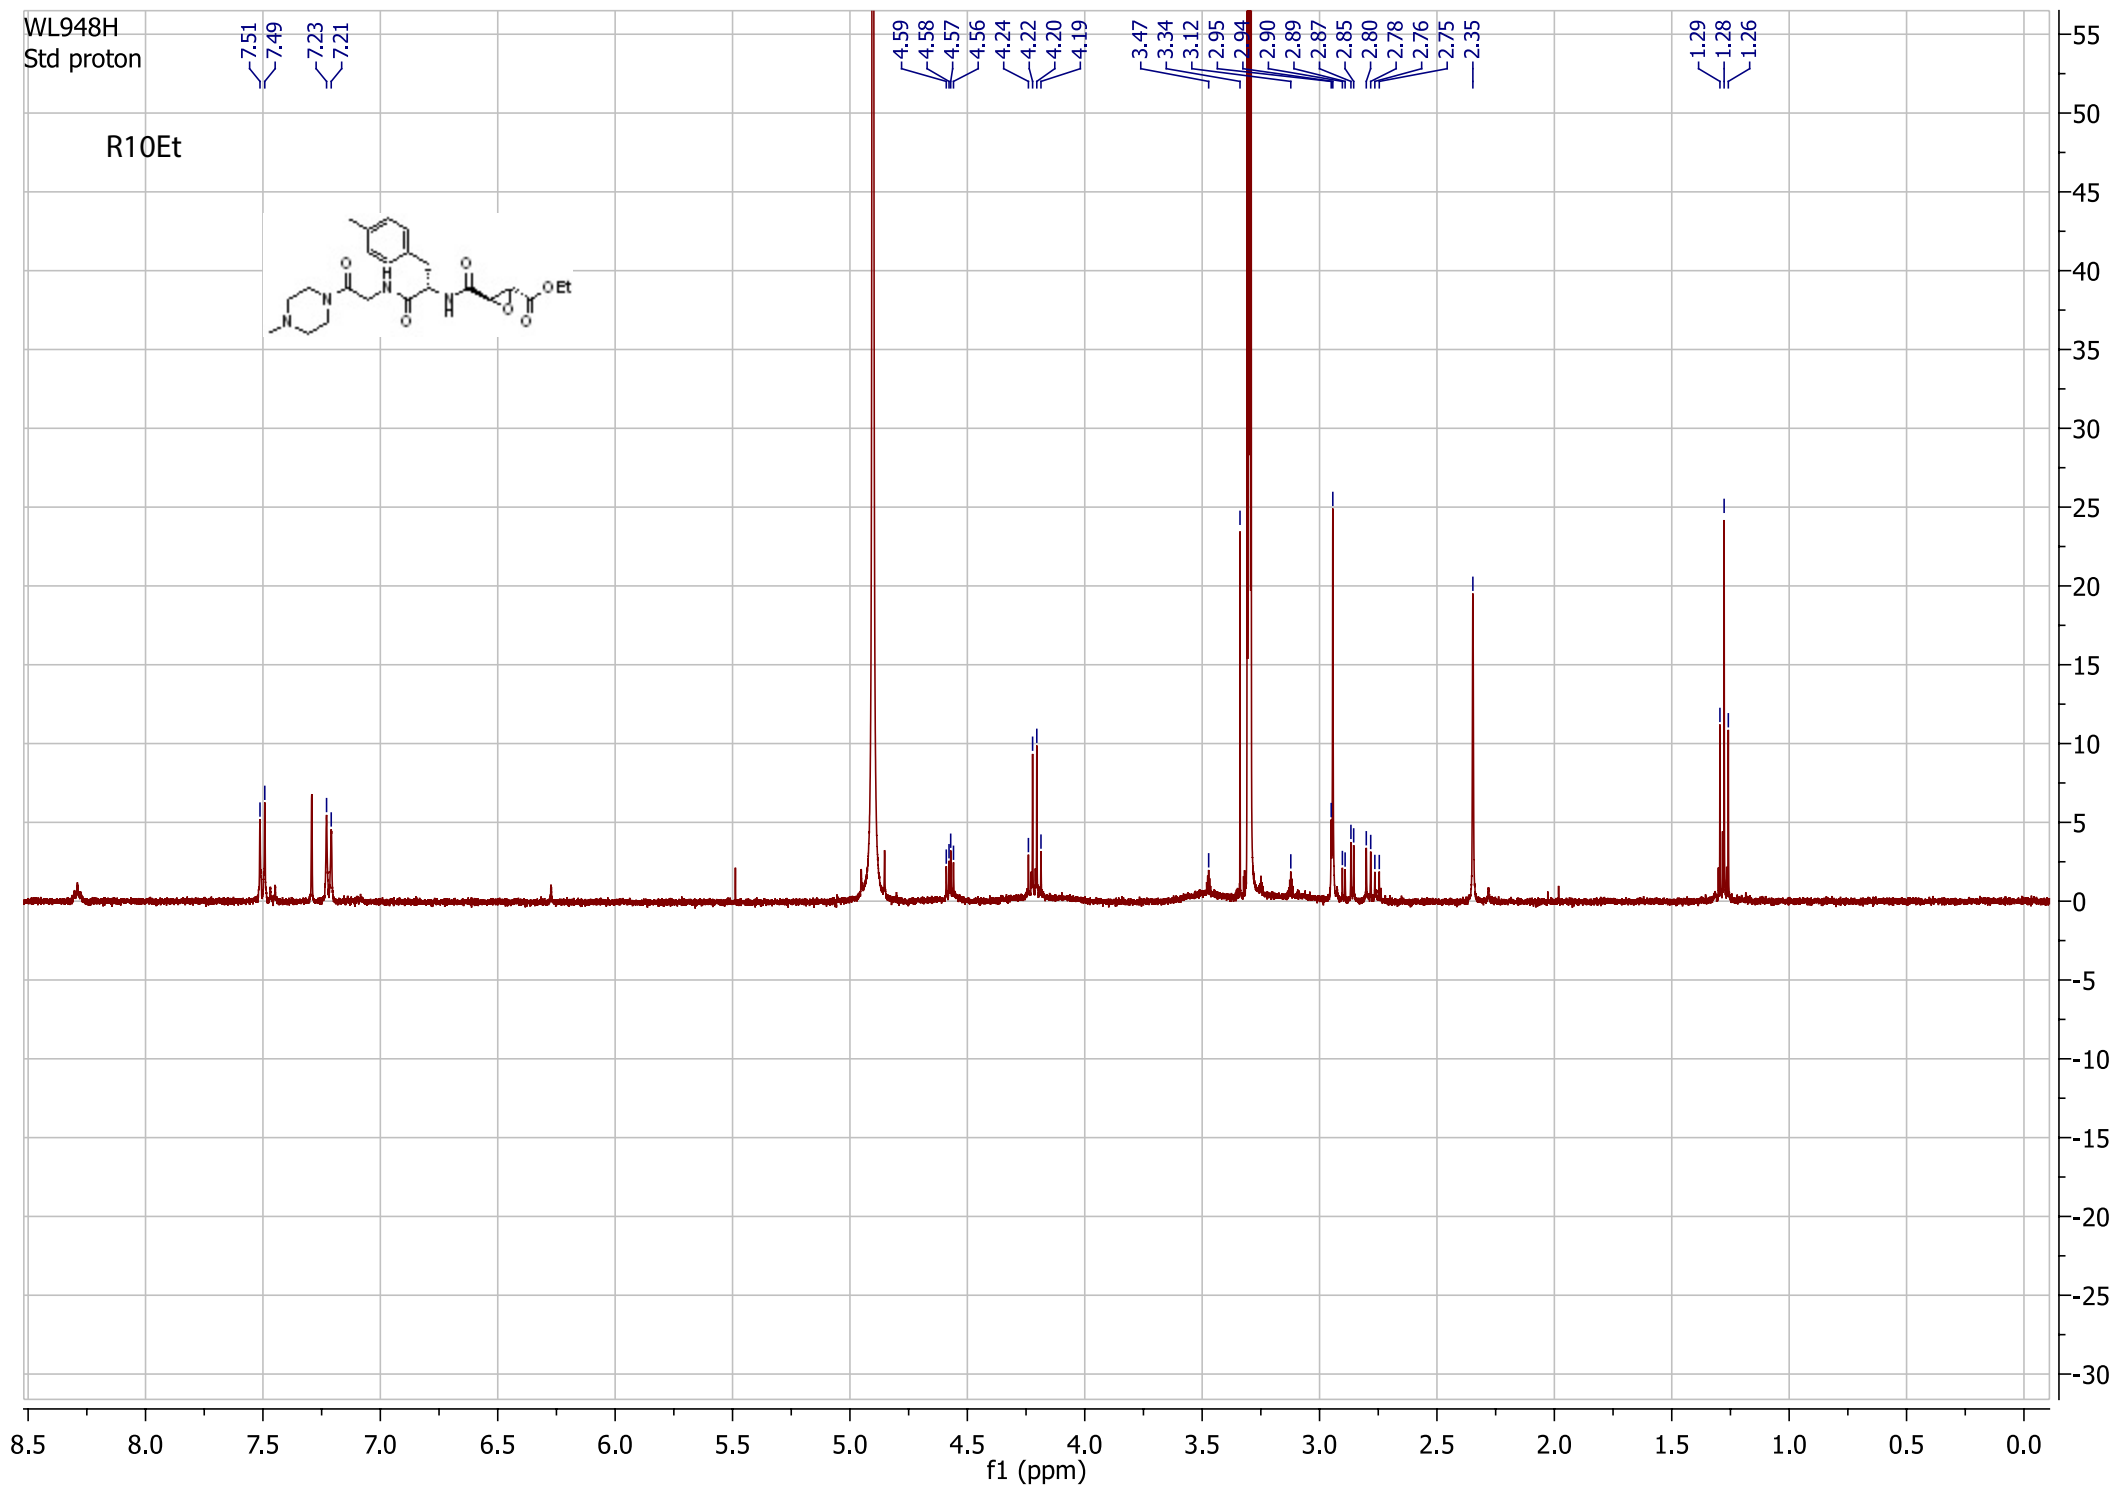

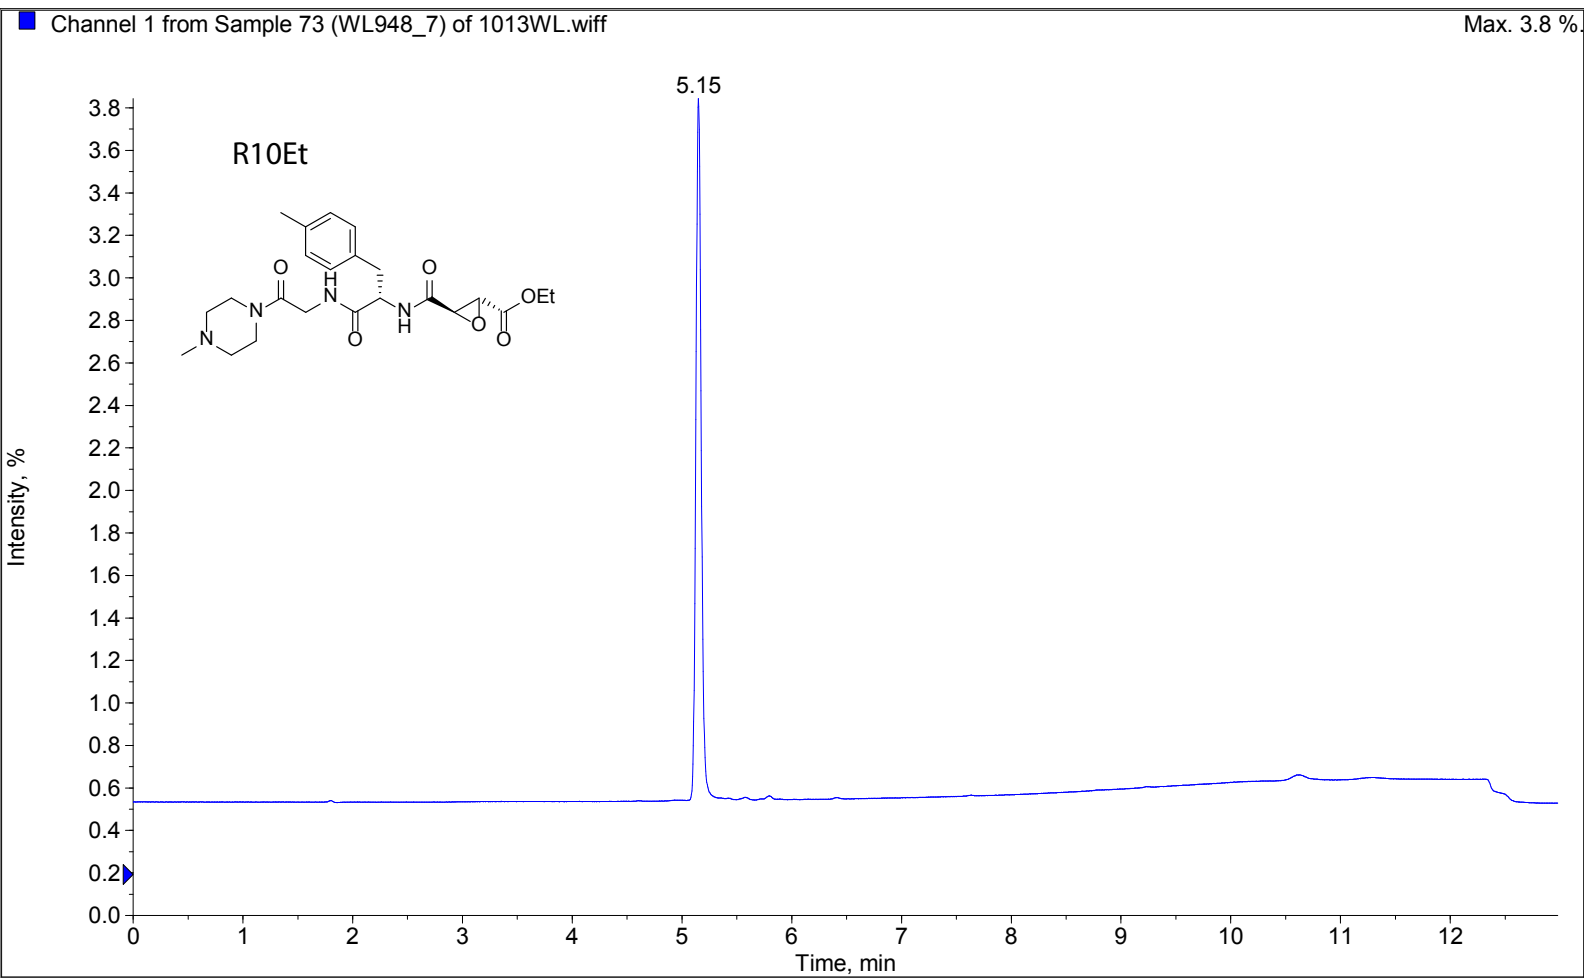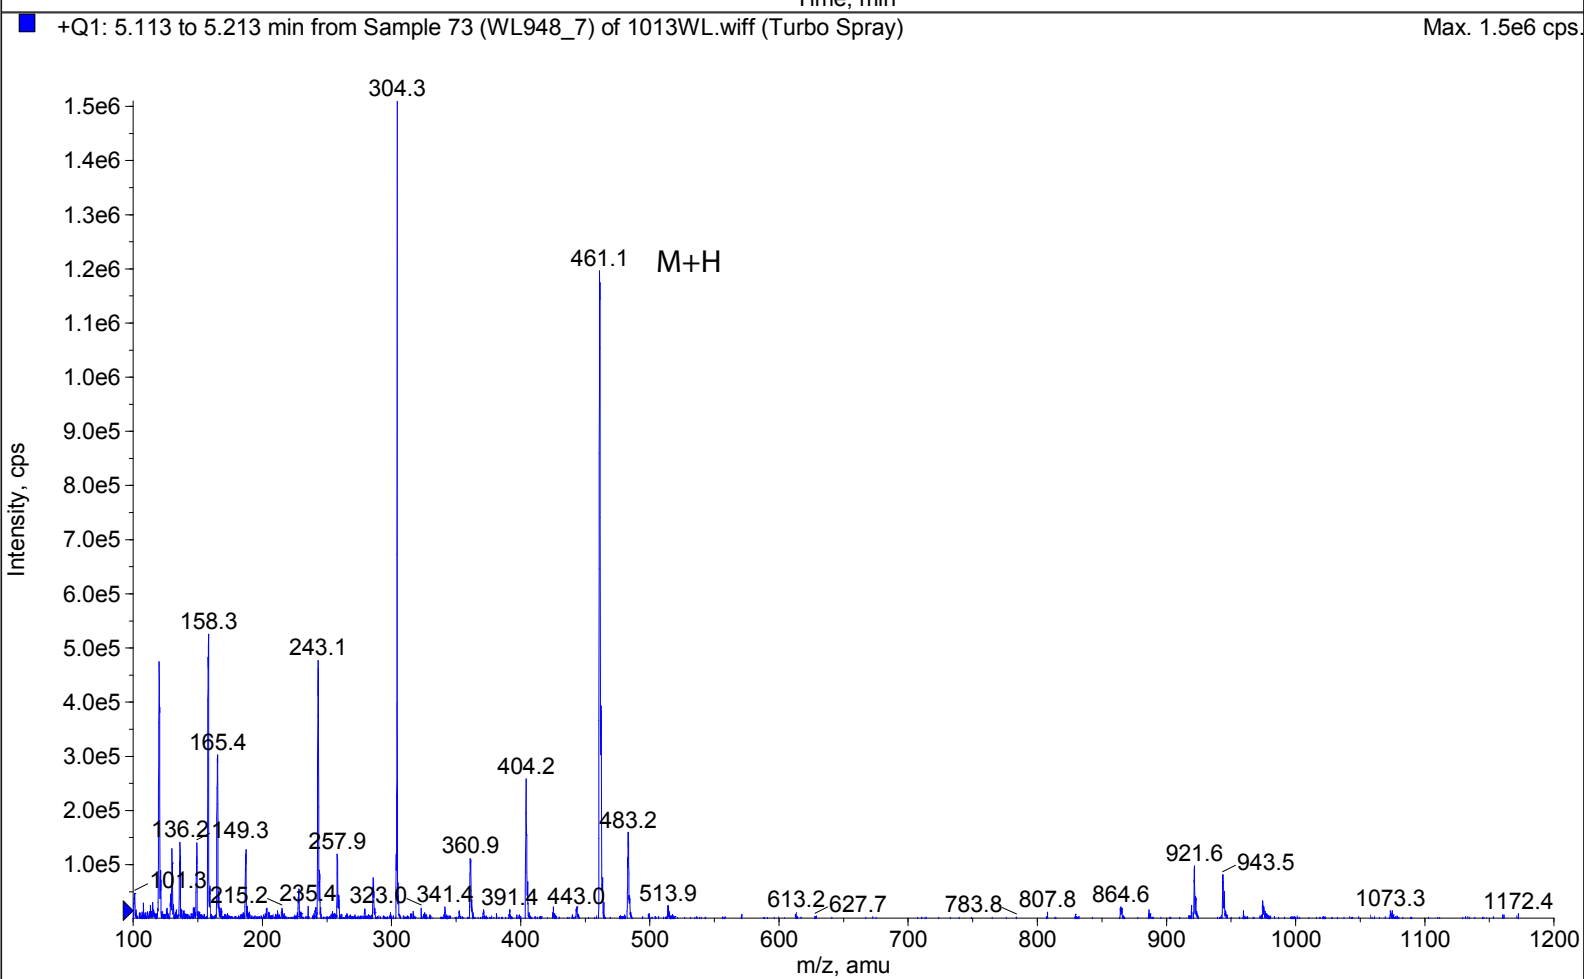

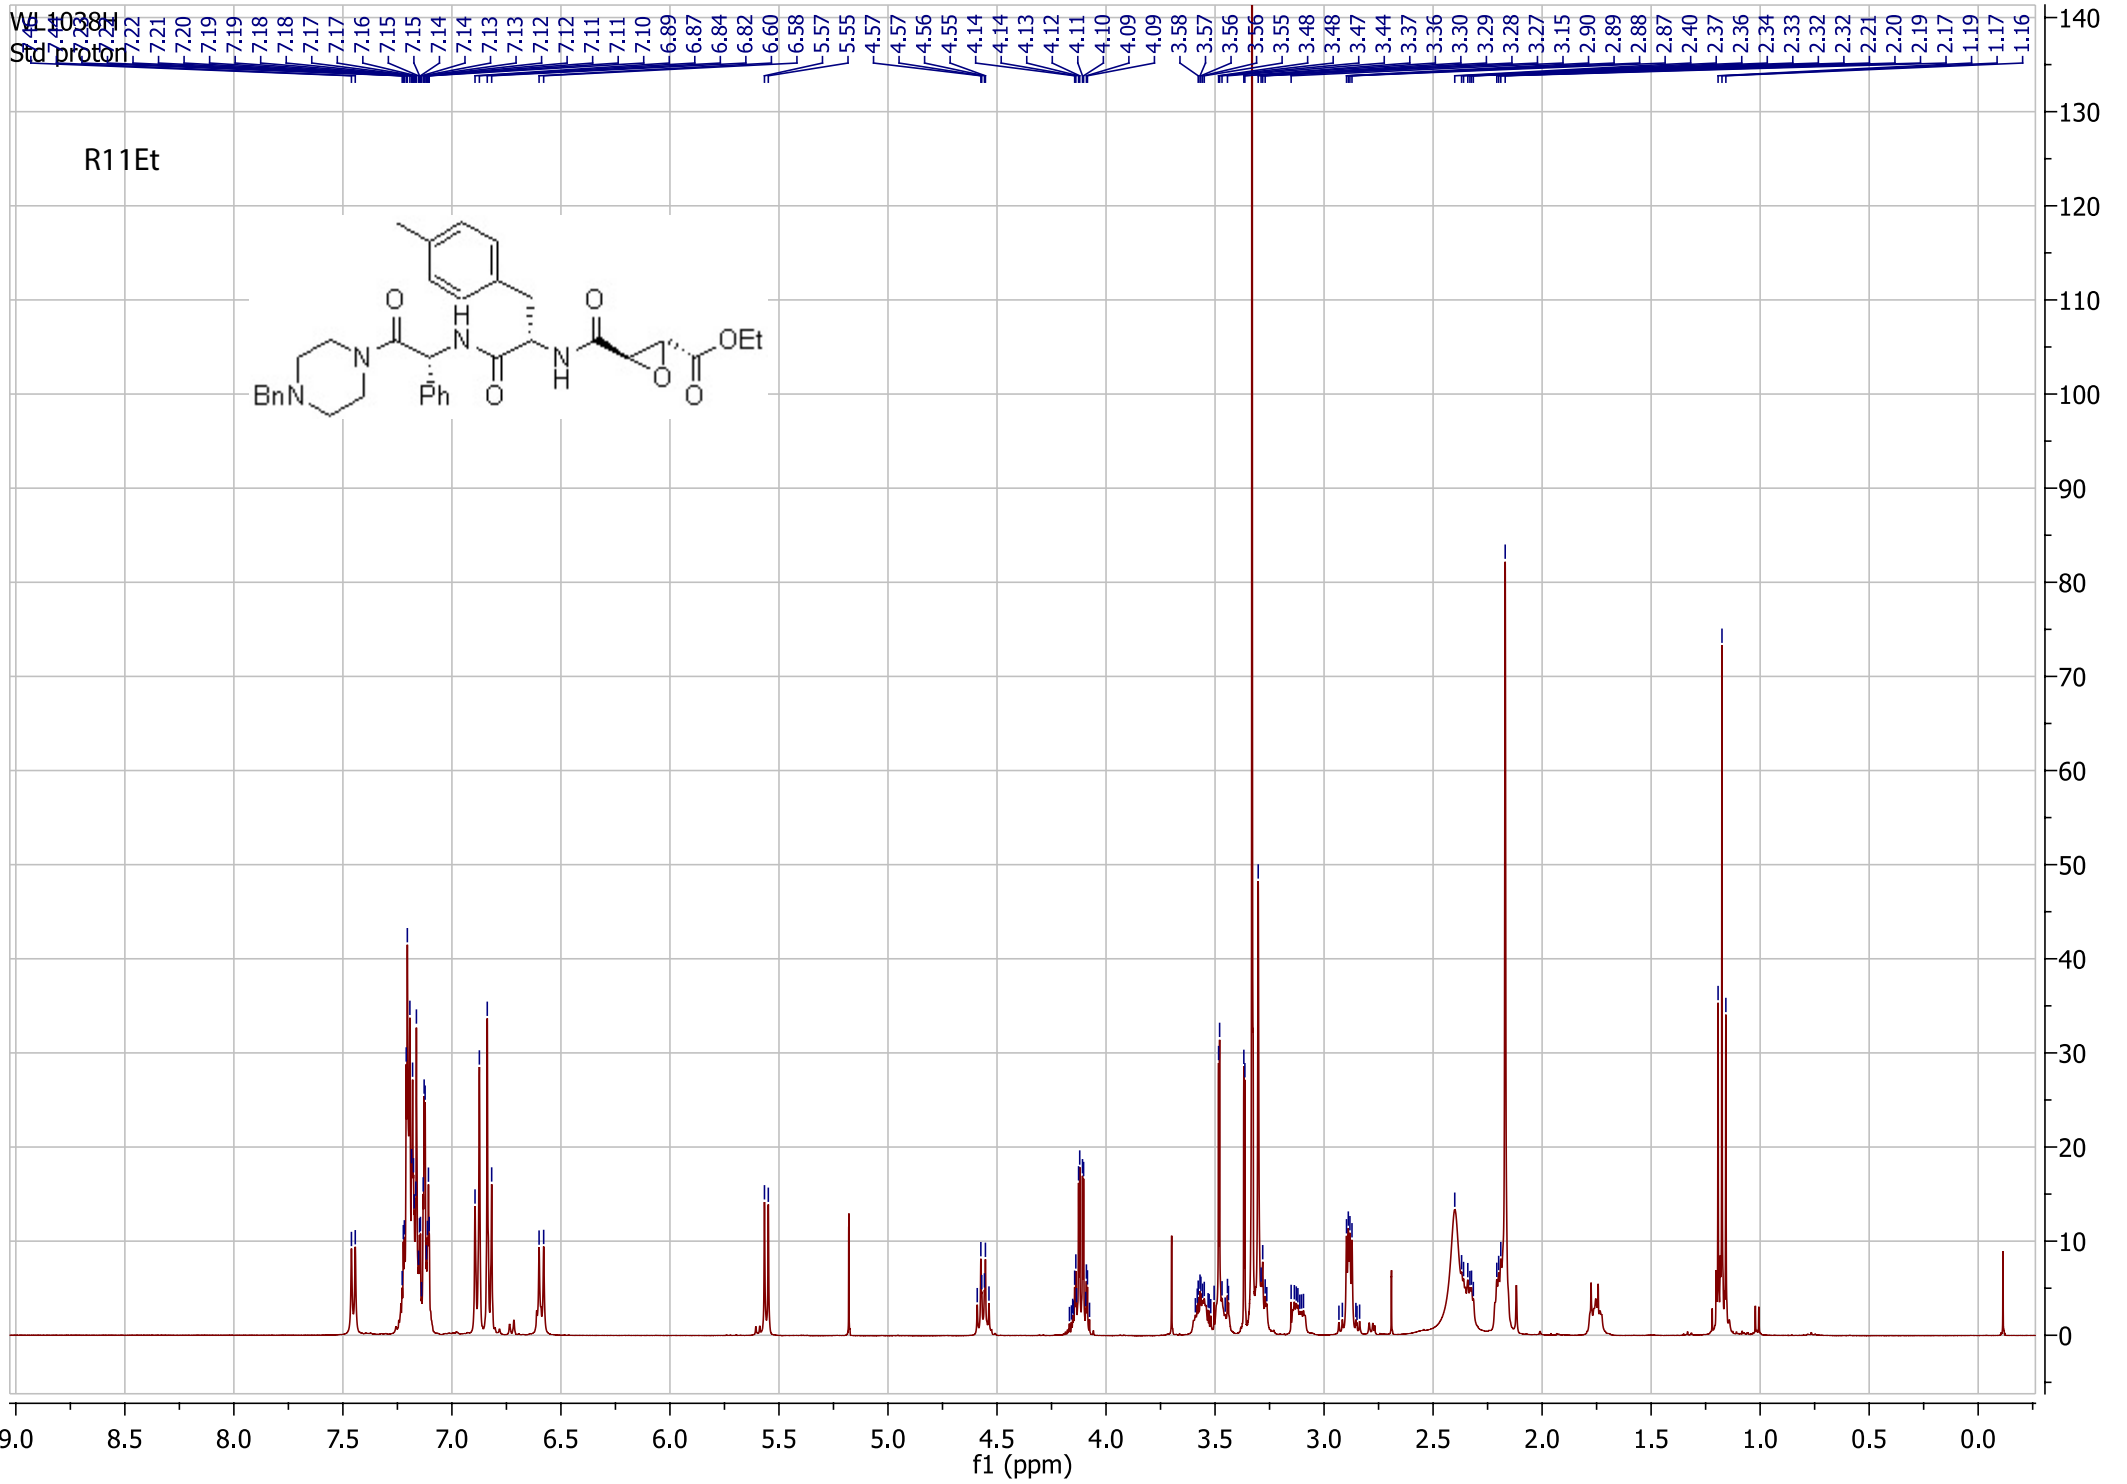

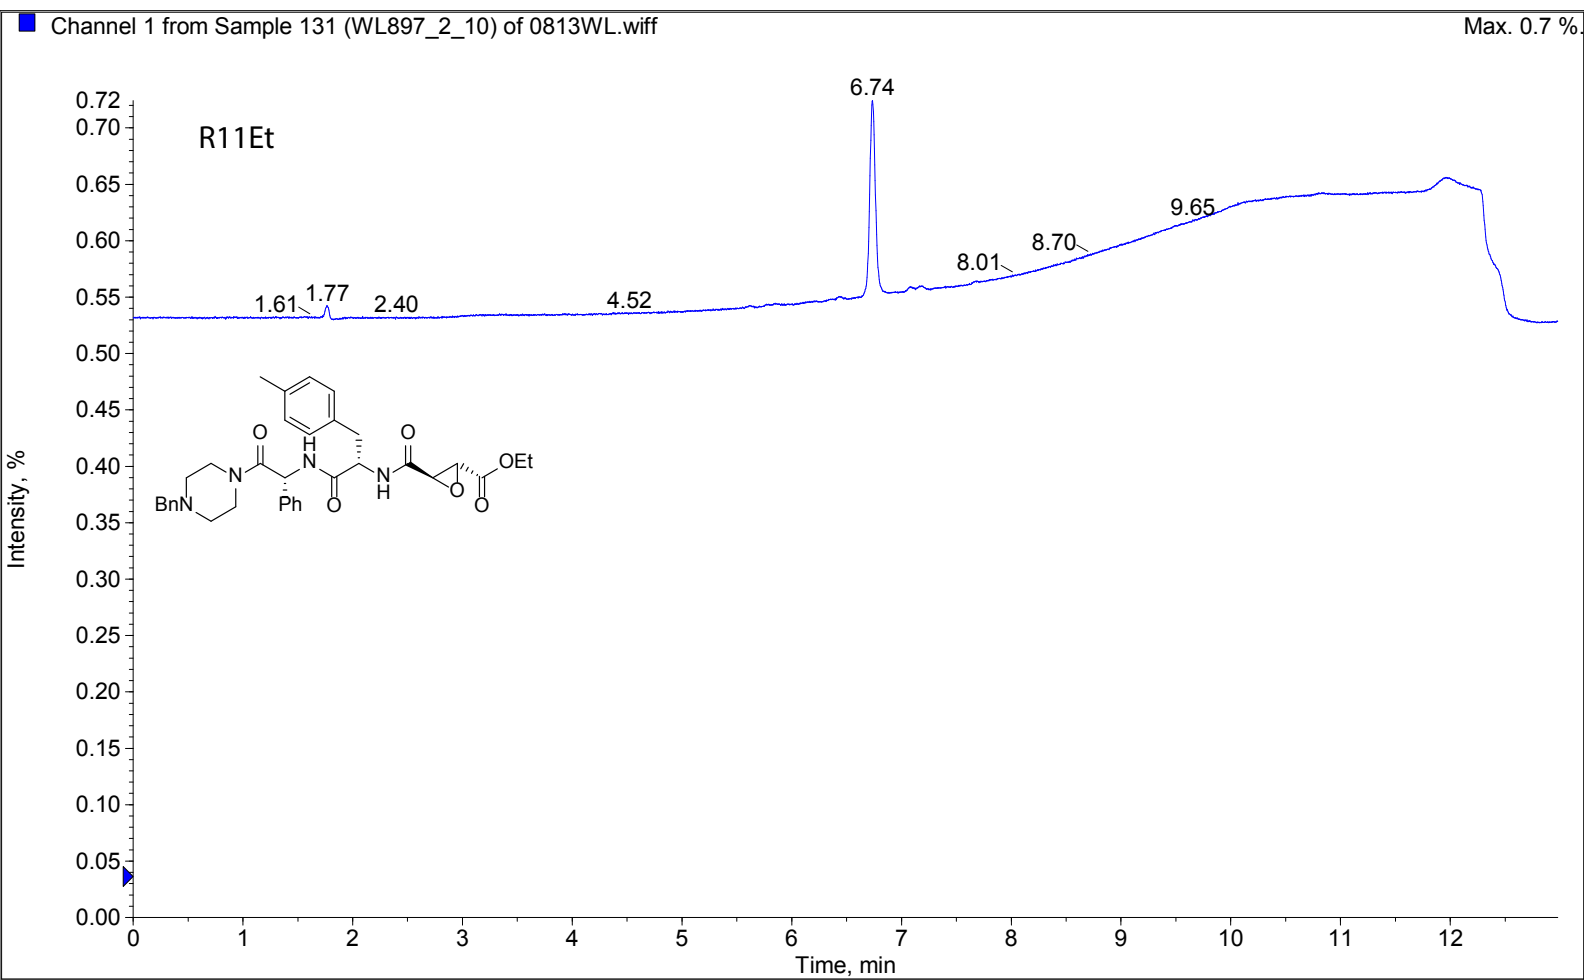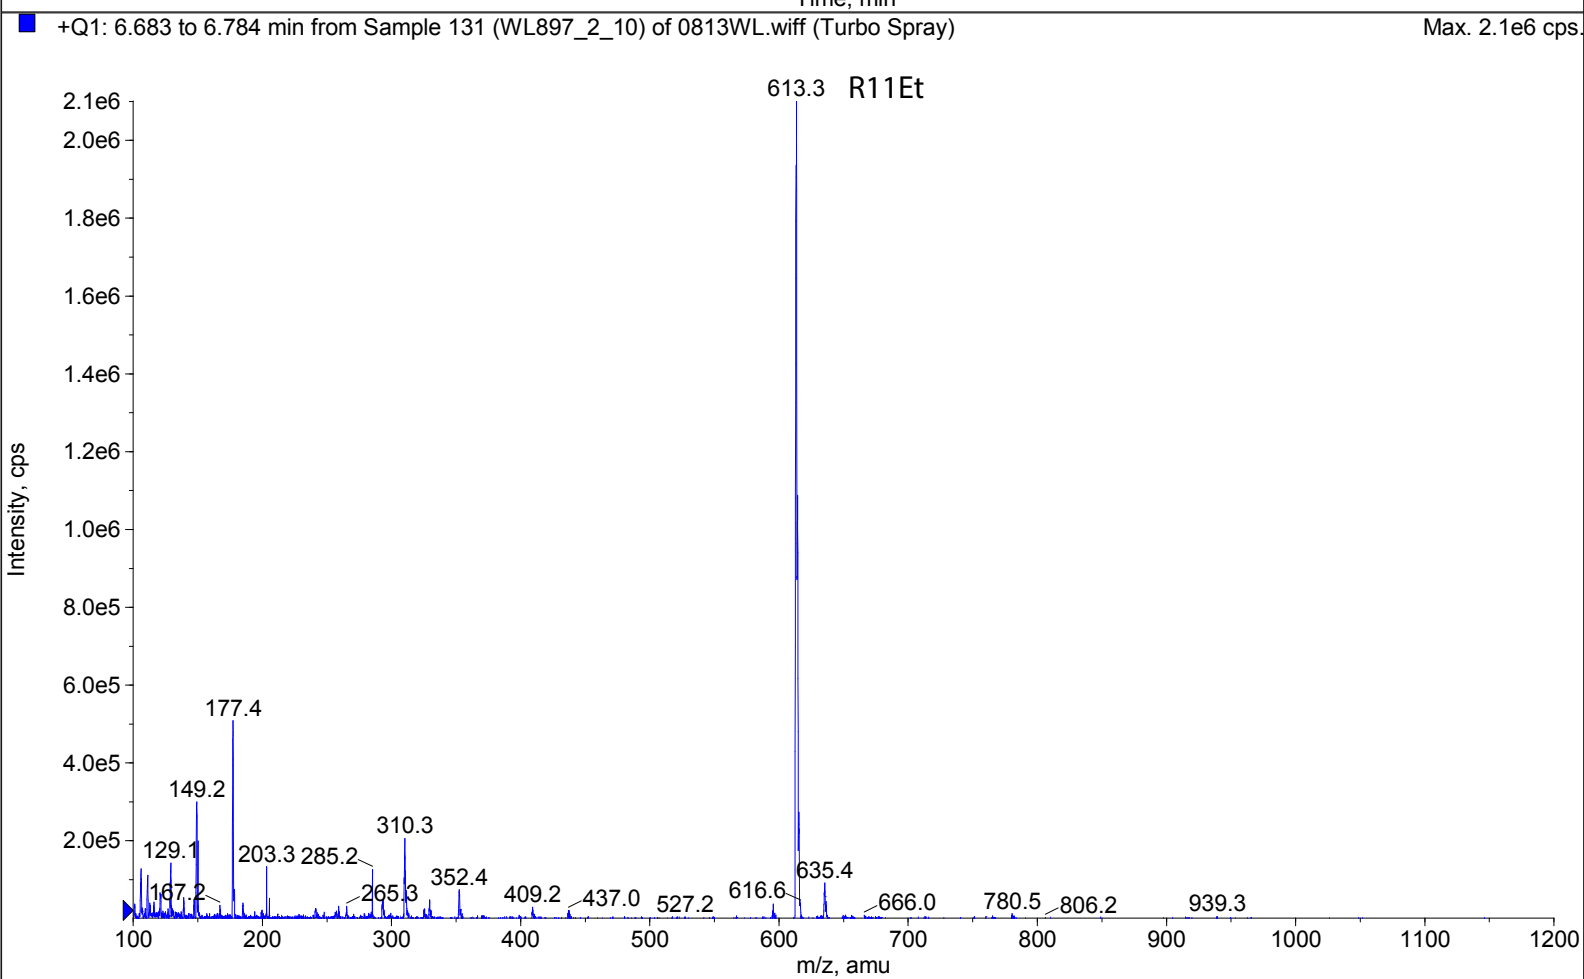

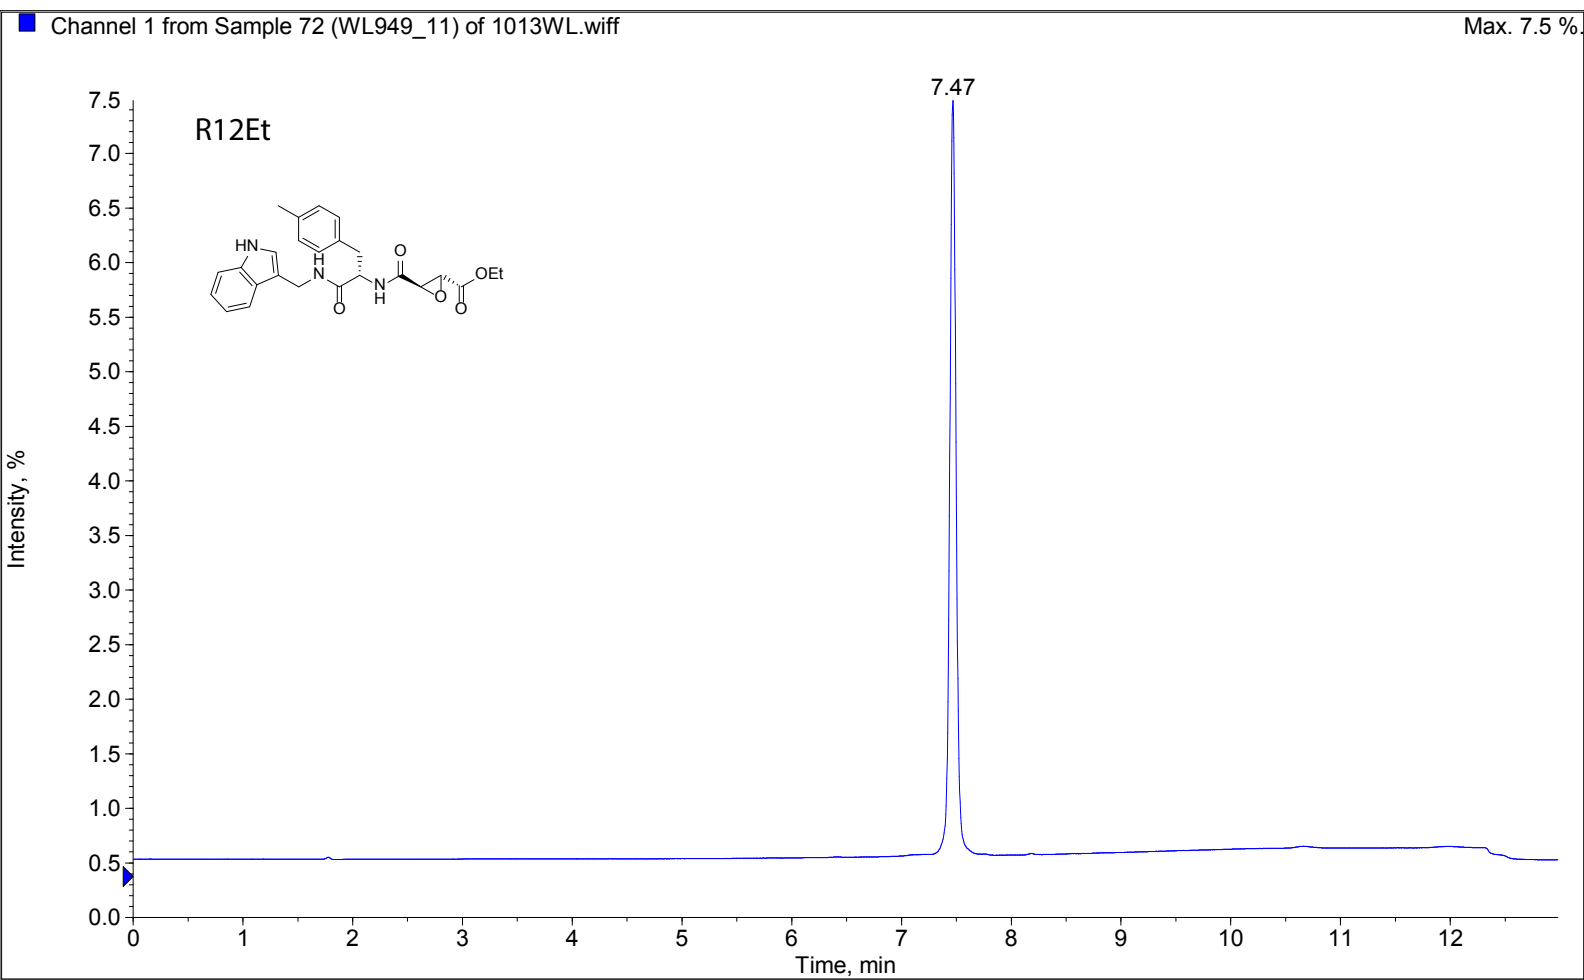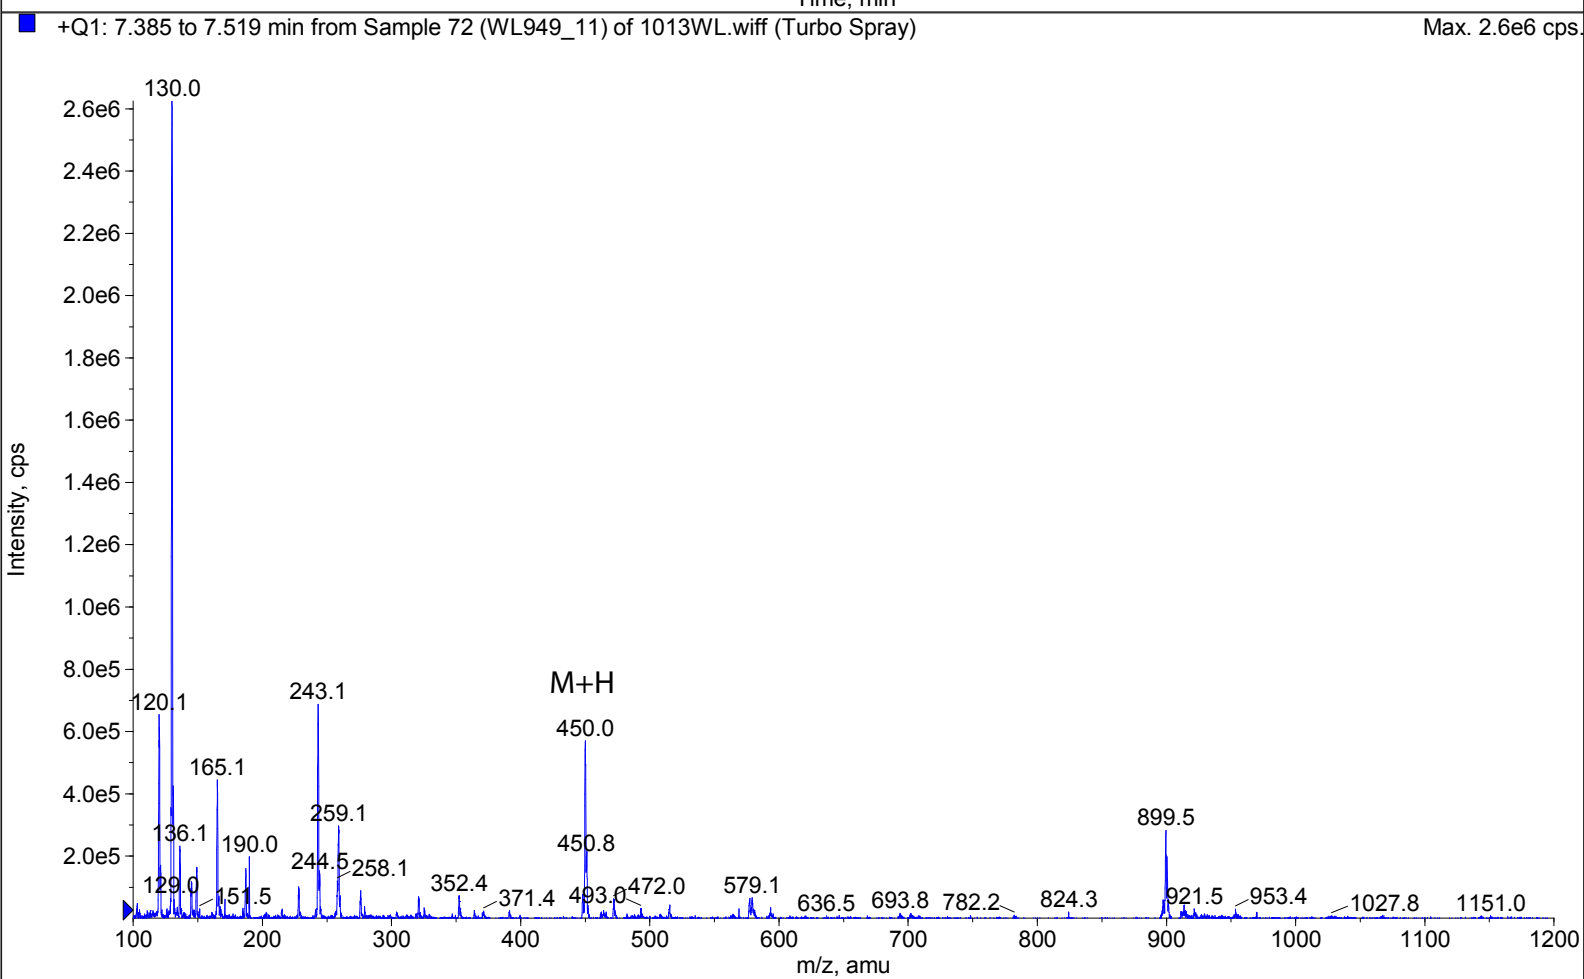

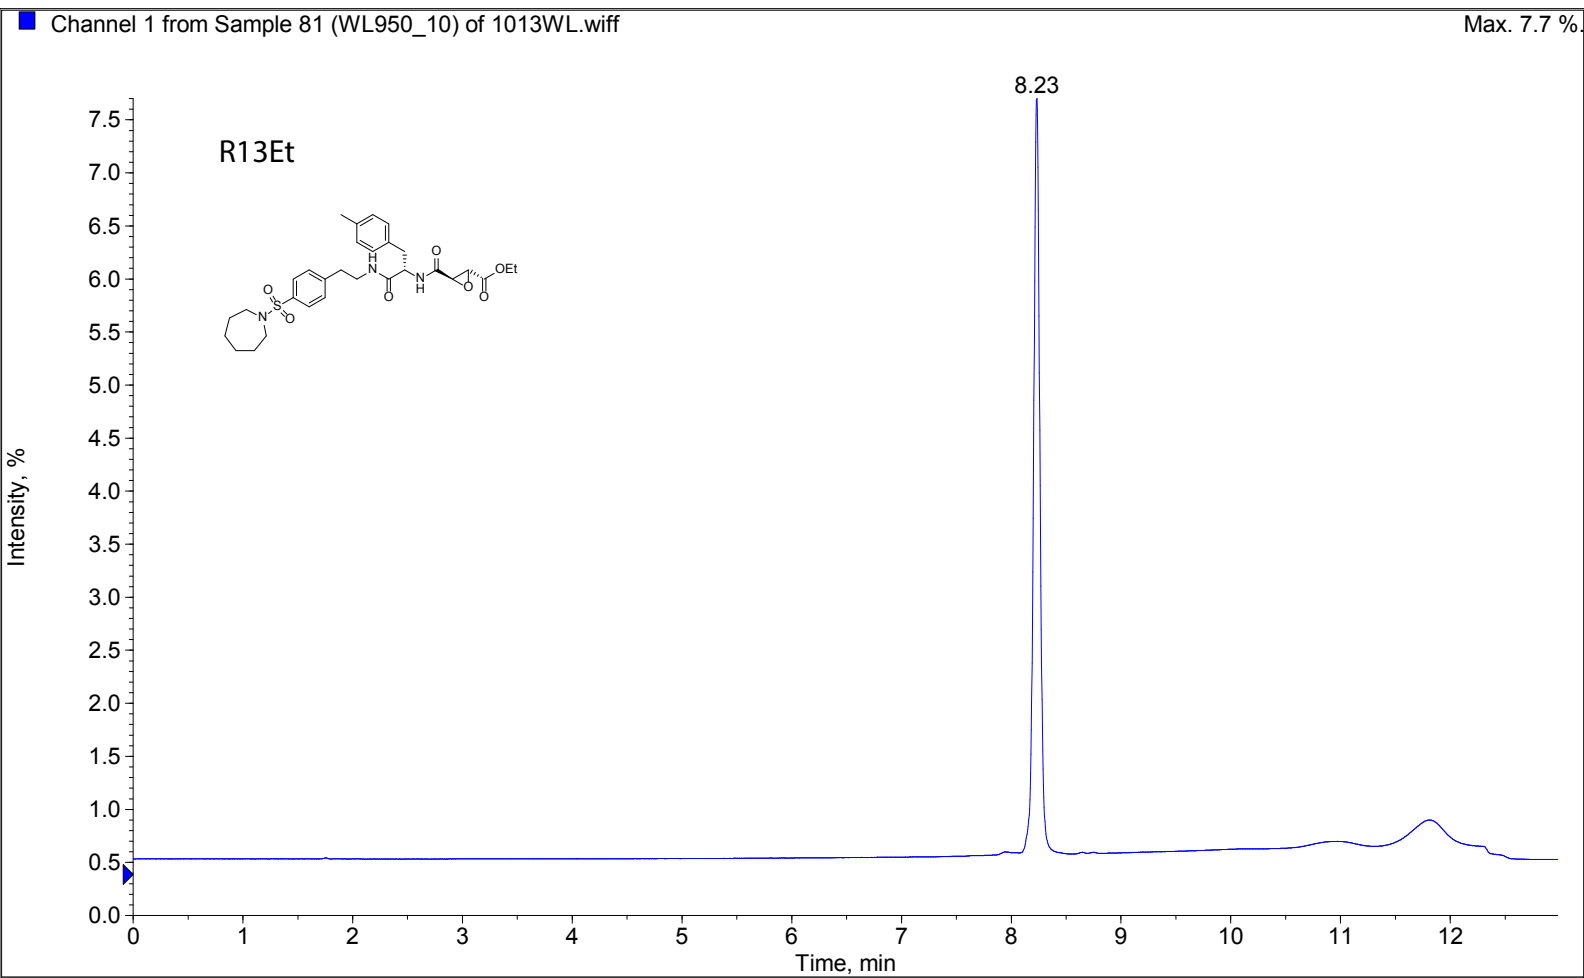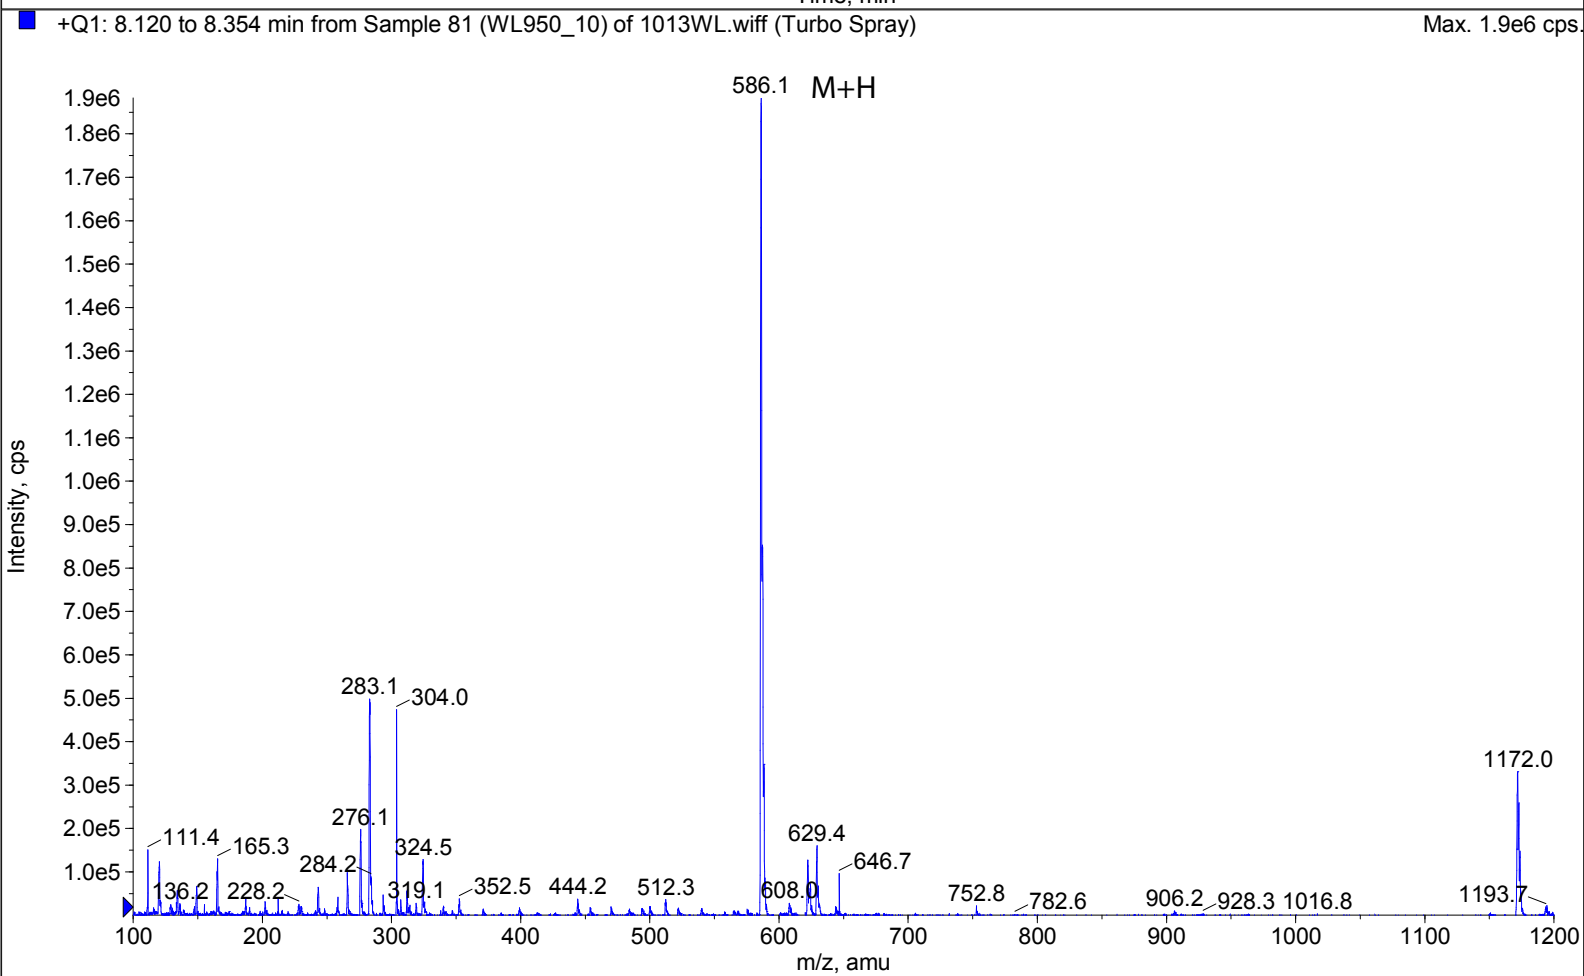

WL1037H  
Std proton

R14Et

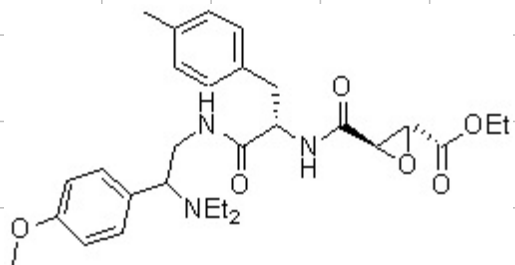

6.99 6.95 6.93 6.90 6.89 6.88 6.87 6.85 6.68 6.67 6.65 6.57 6.55 6.13 4.36 4.36 4.34 4.33 4.32 4.31 4.11 4.10 4.09 4.08 4.07 4.07 4.06 4.06 4.05 4.04 4.03 3.62 3.47 3.47 3.31 3.30 2.90 2.88 2.86 2.84 2.83 2.81 2.79 2.77 2.75 2.73 1.55 1.14 1.13 1.12 0.79 0.78 0.76 0.75 0.70

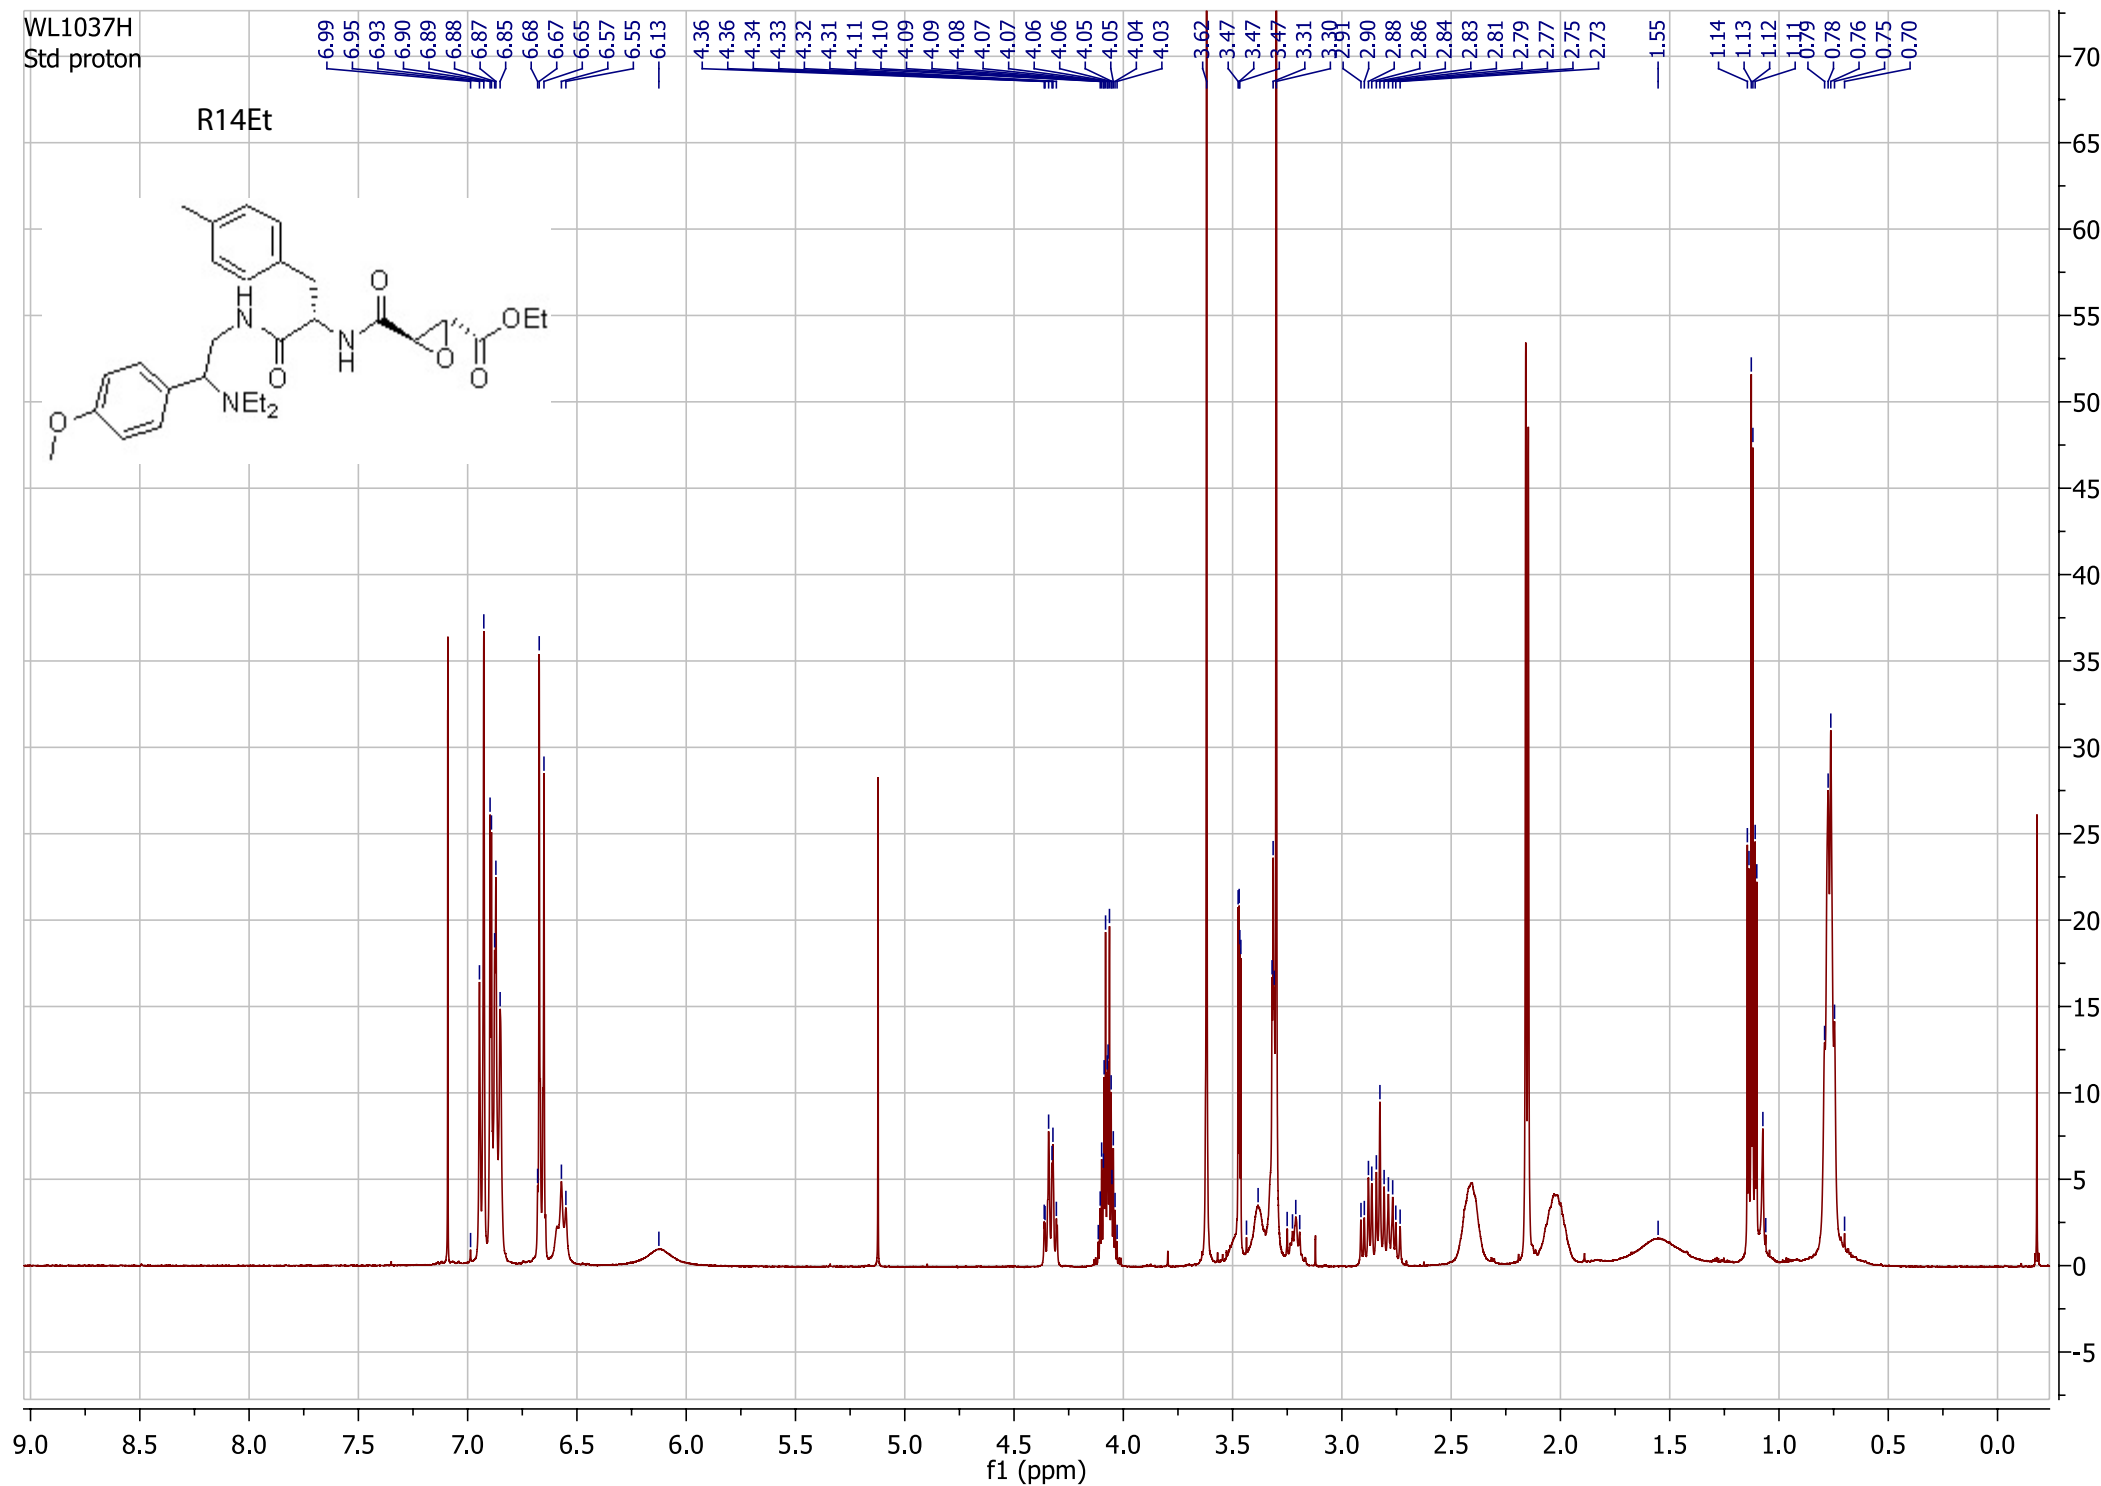



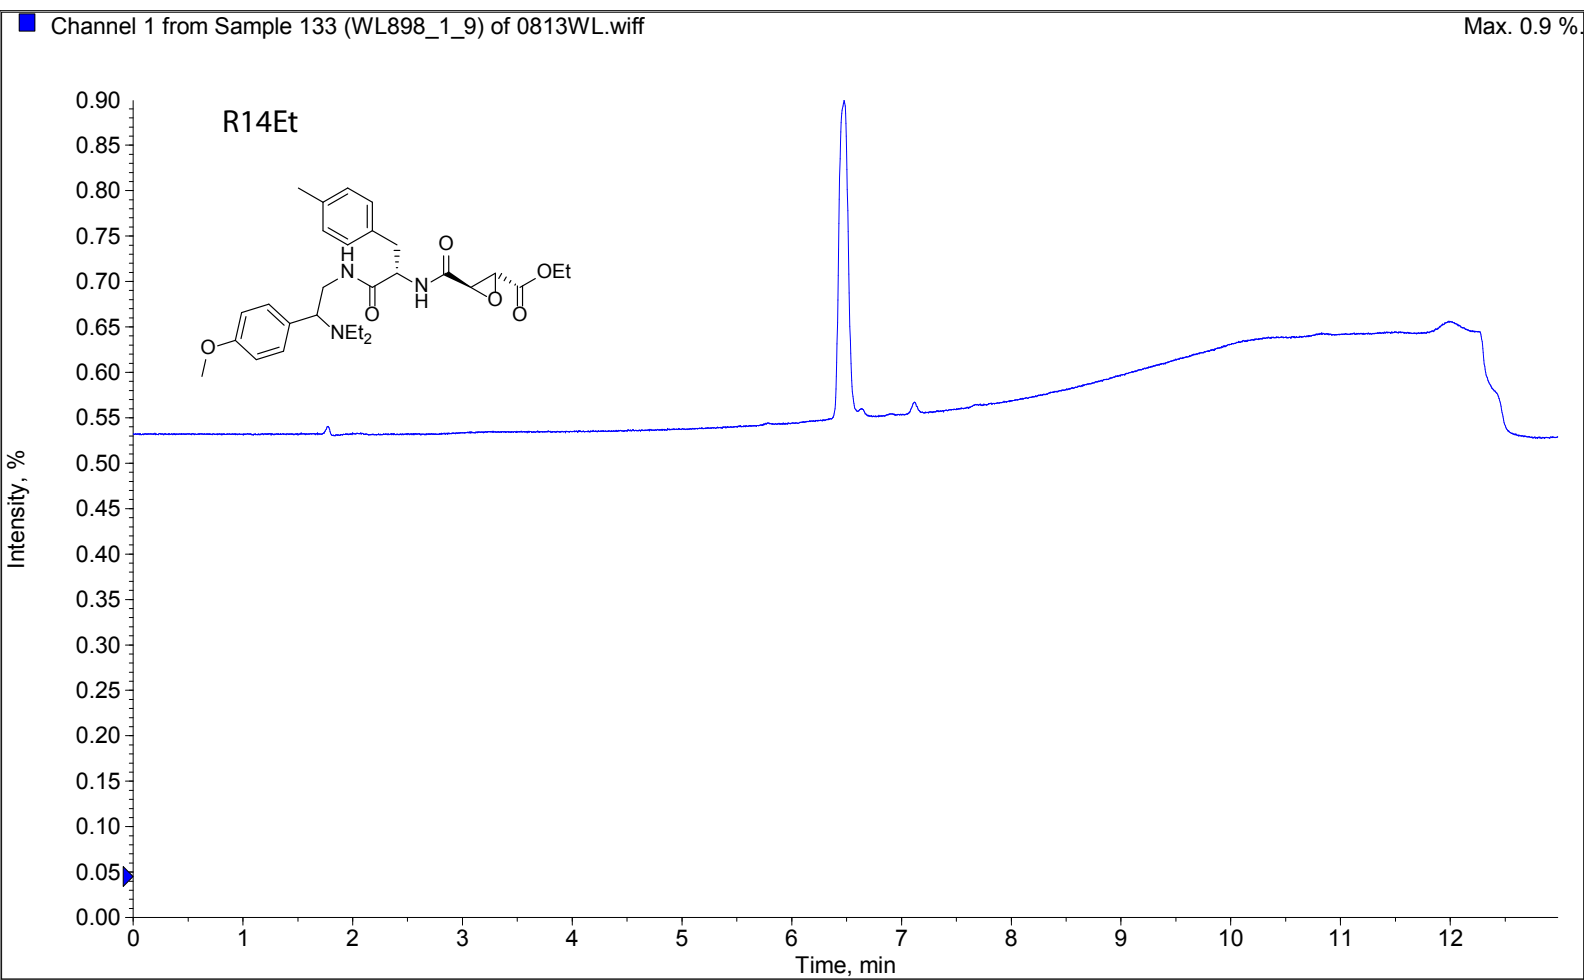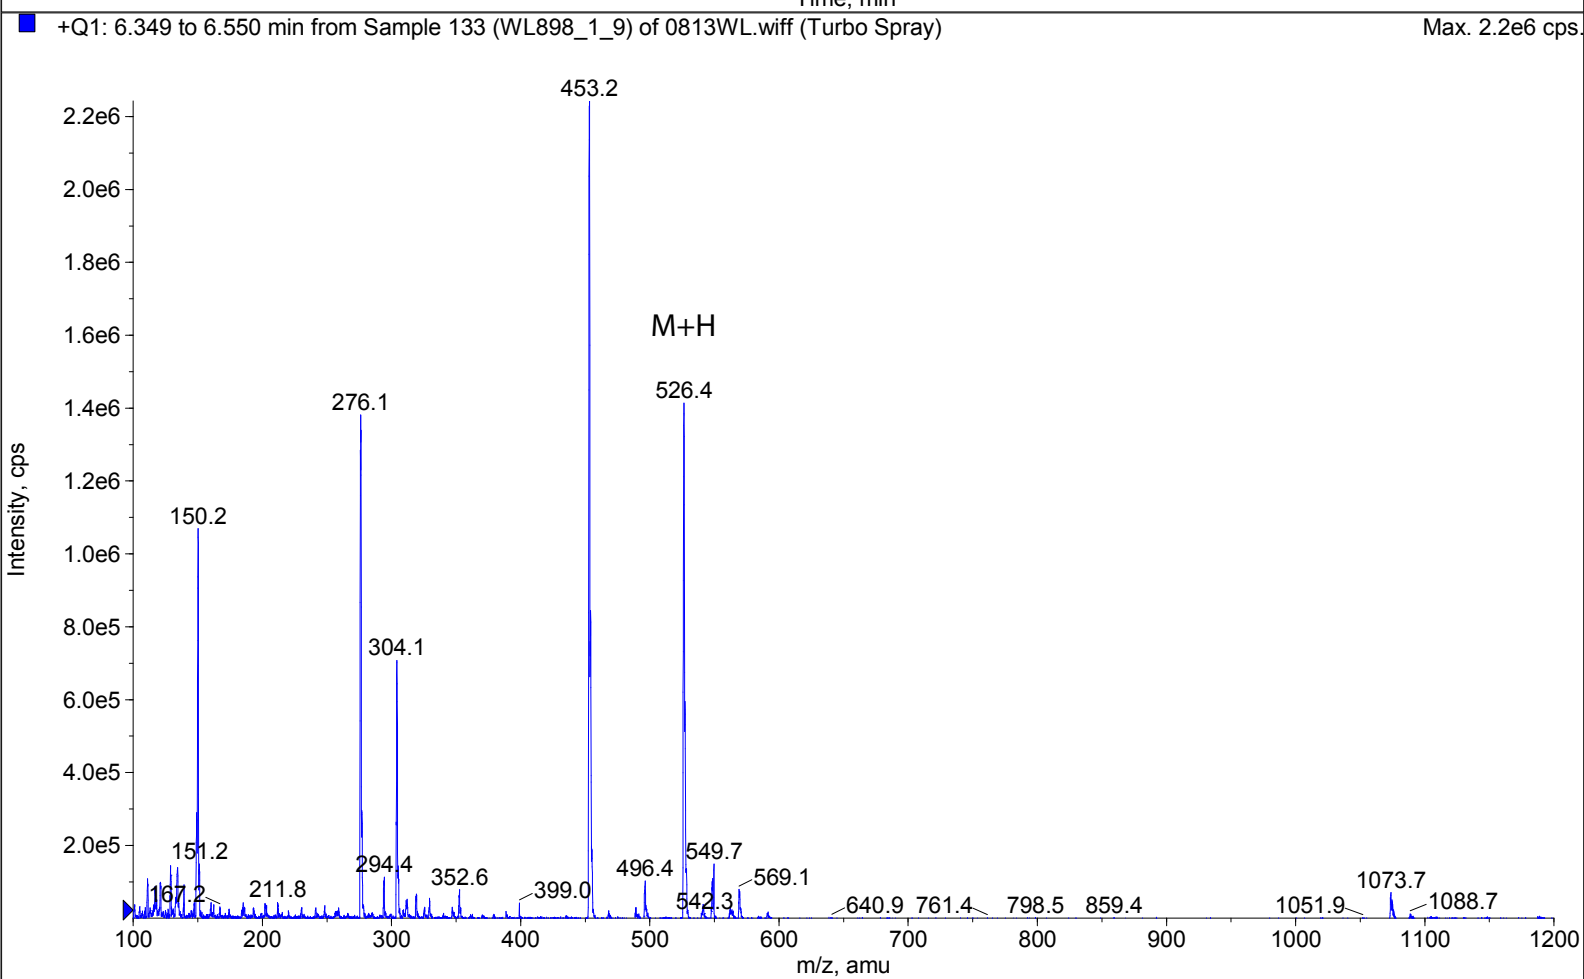

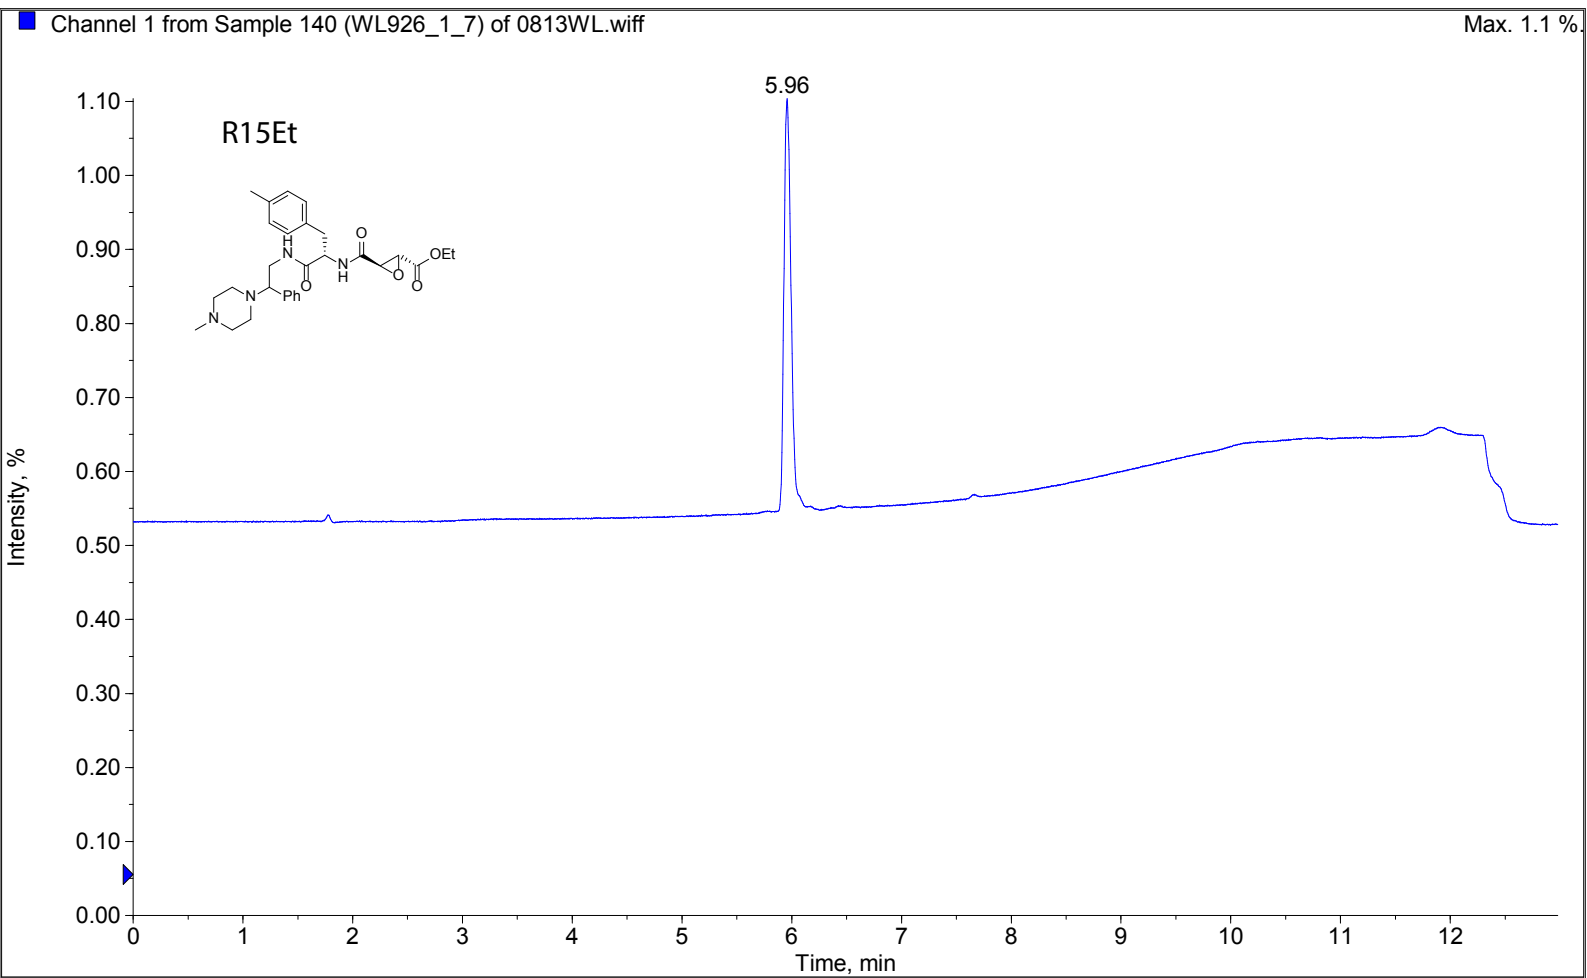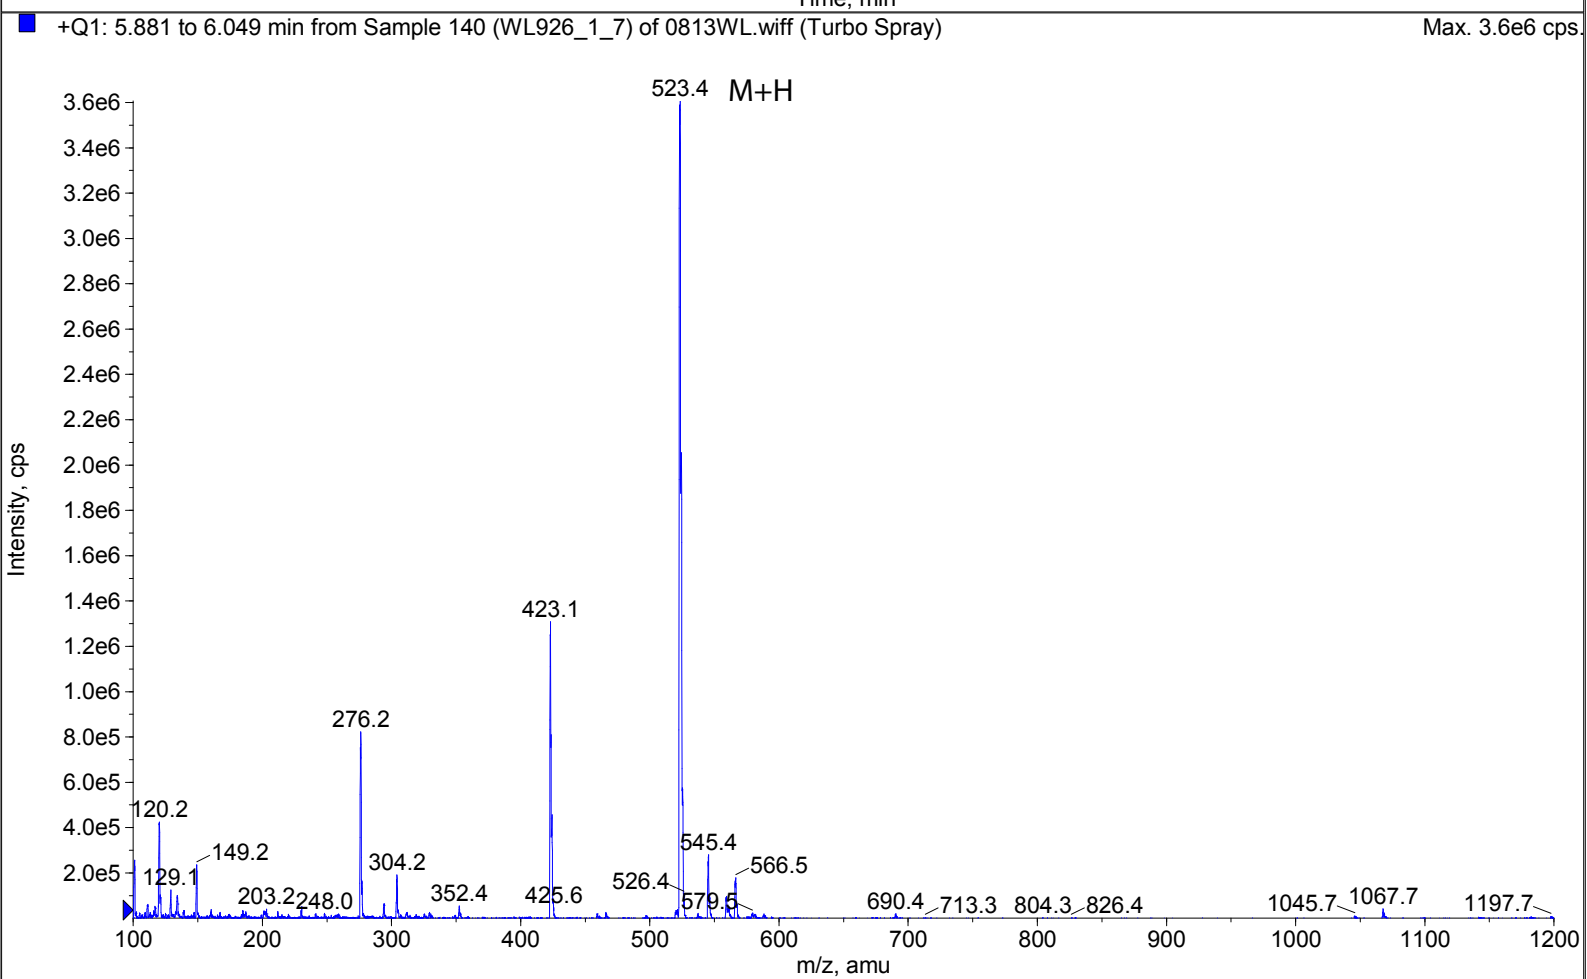

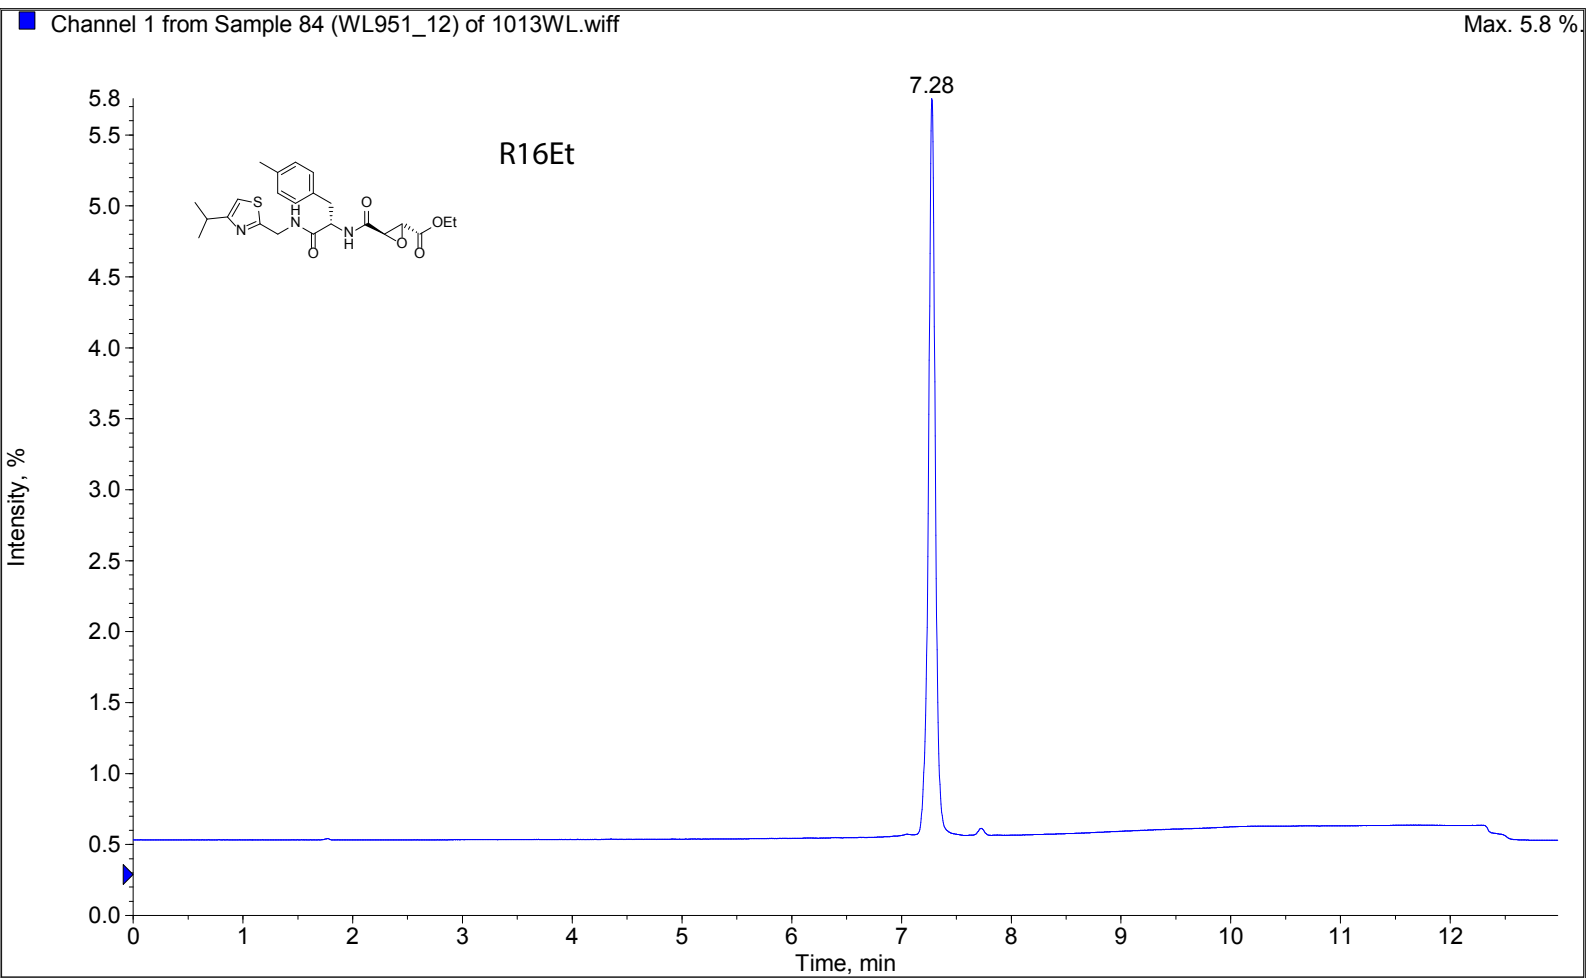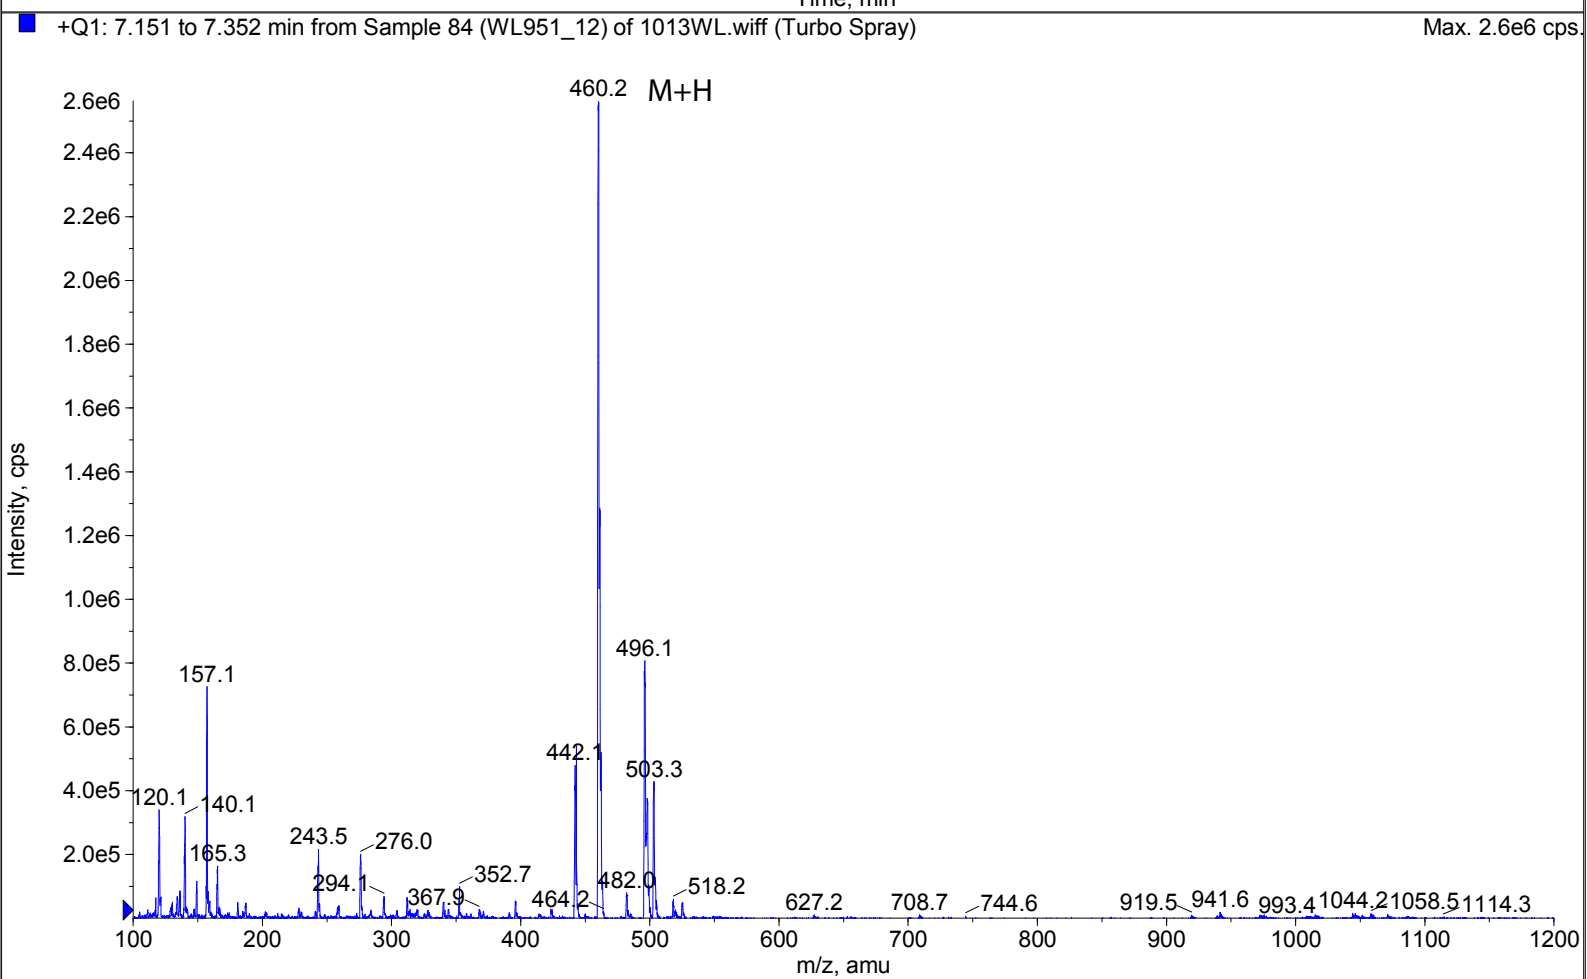

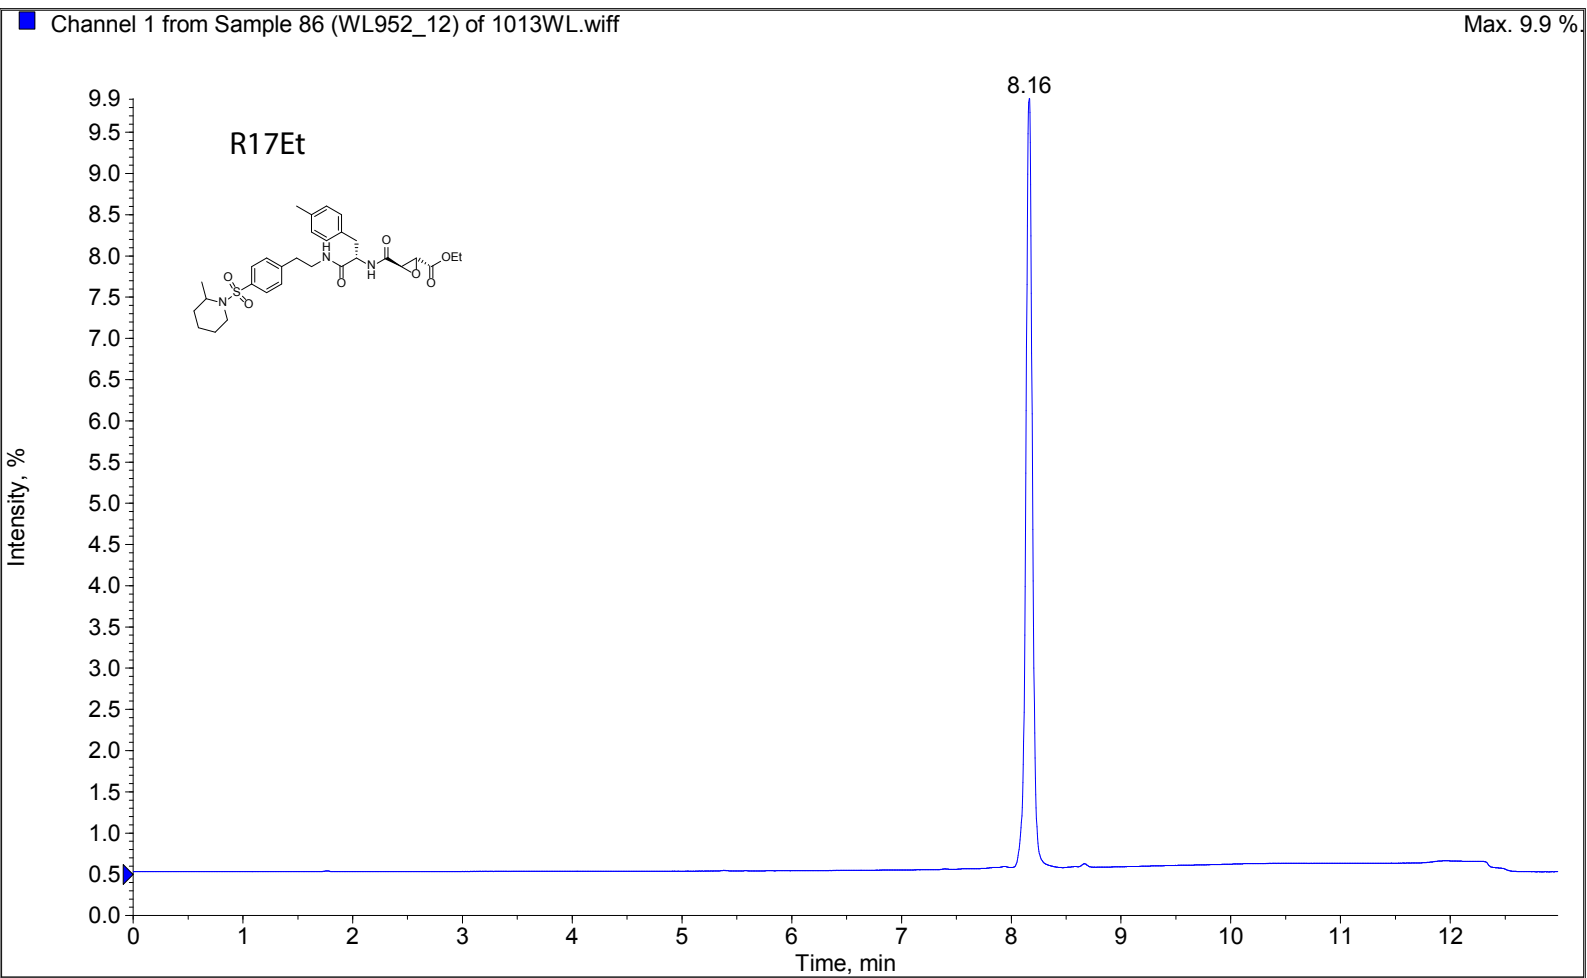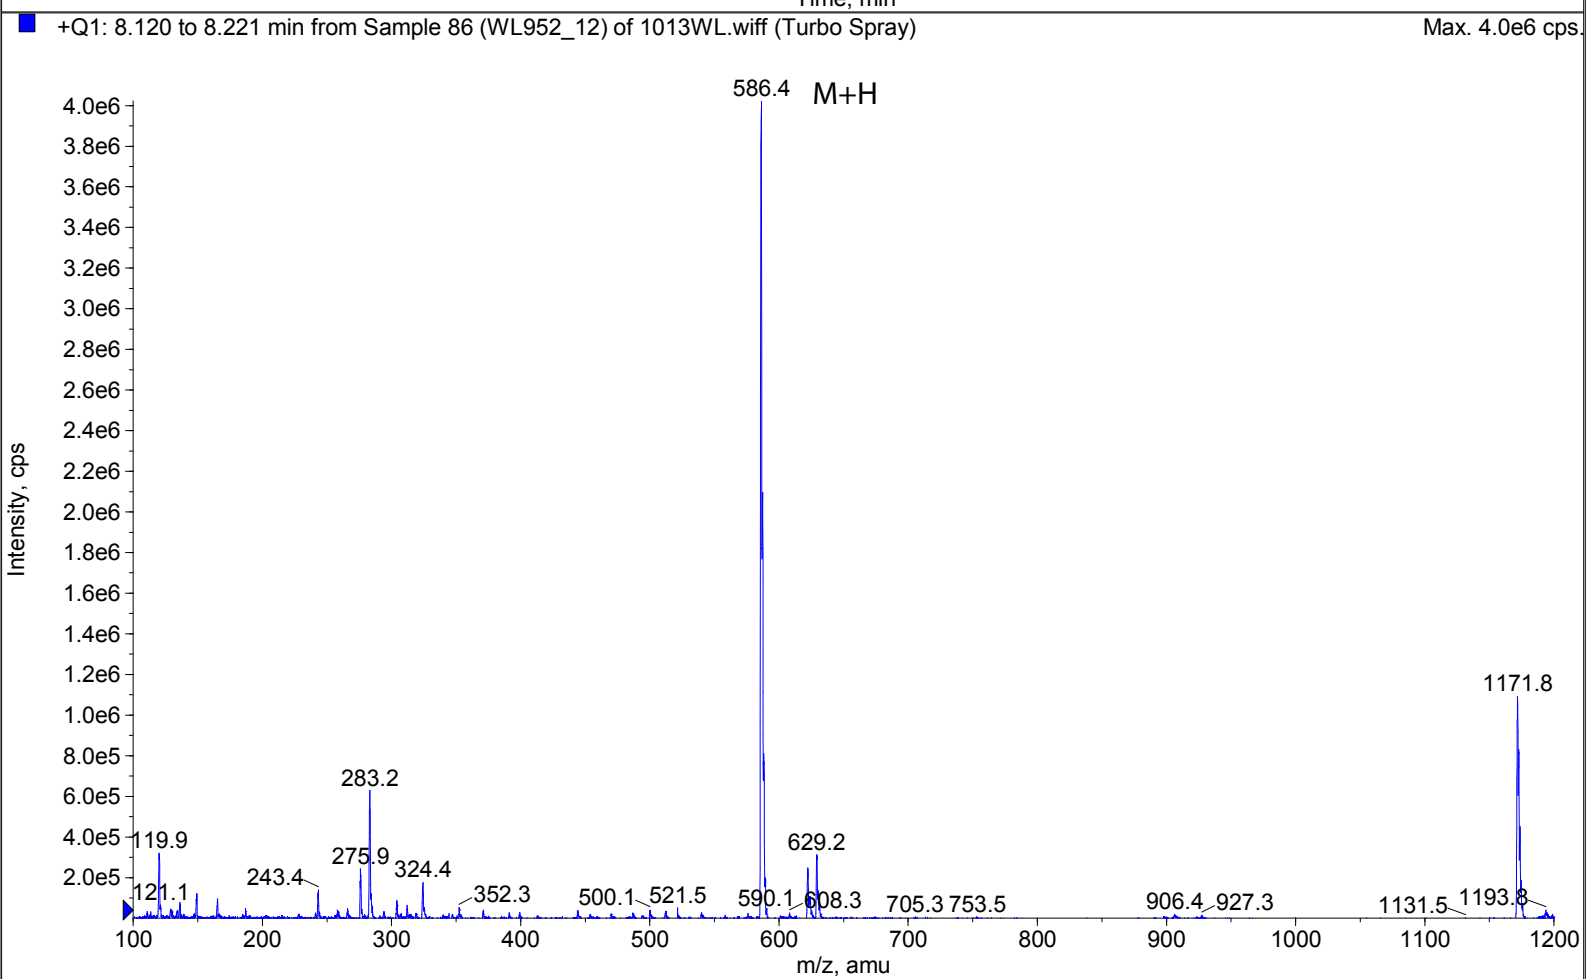

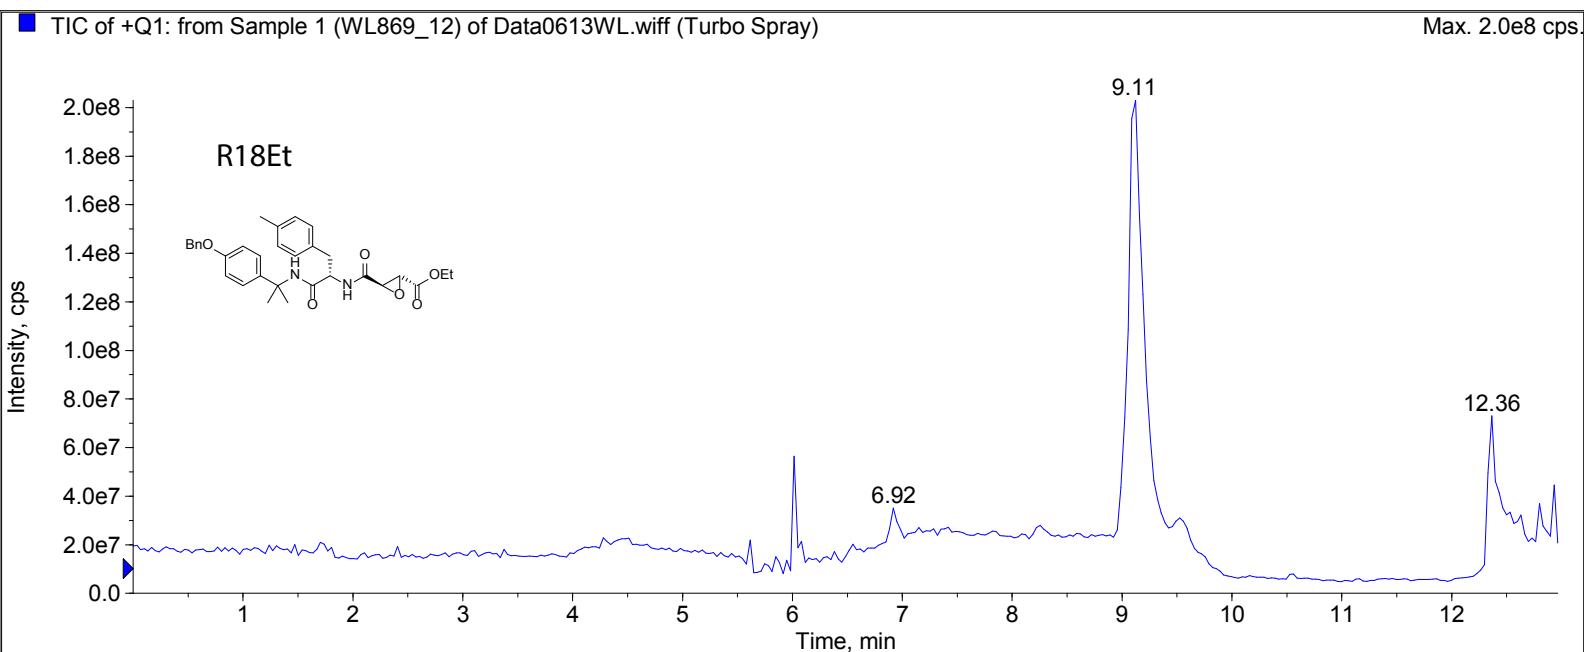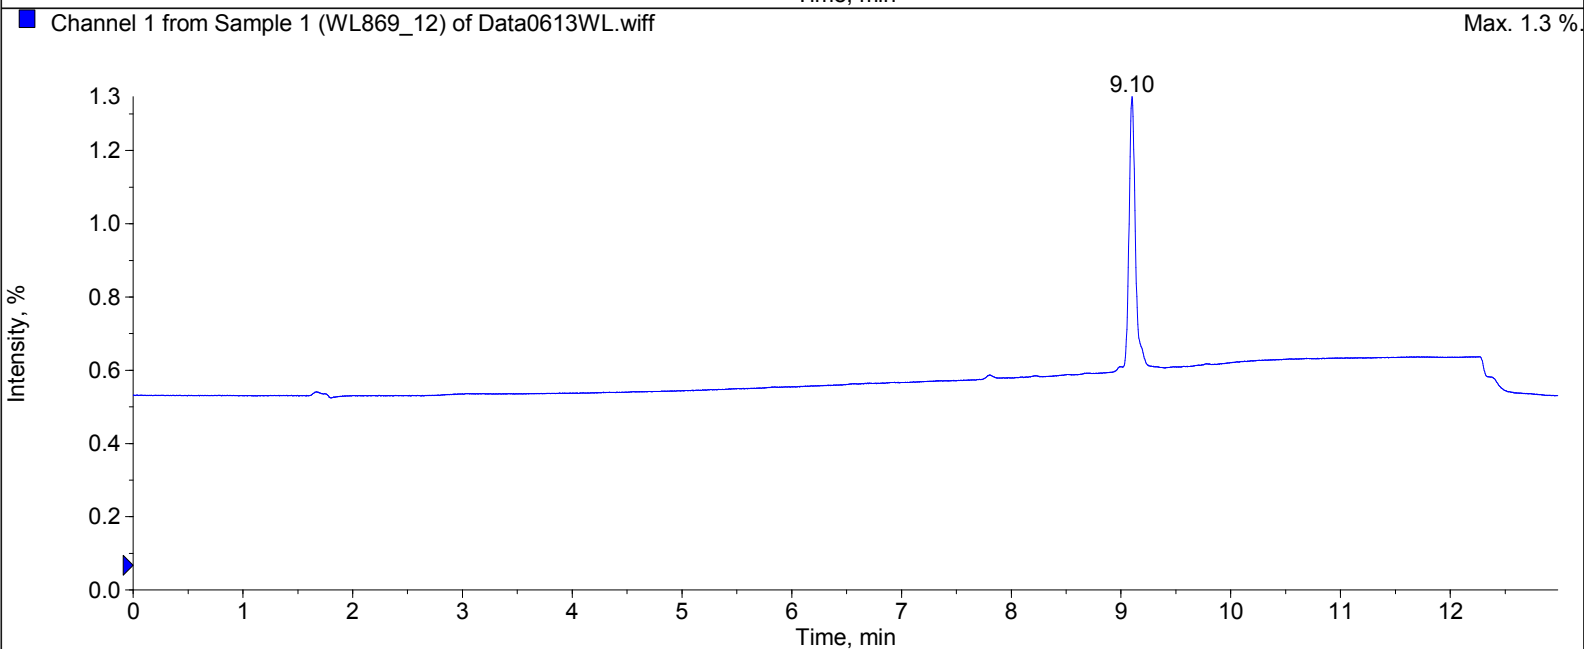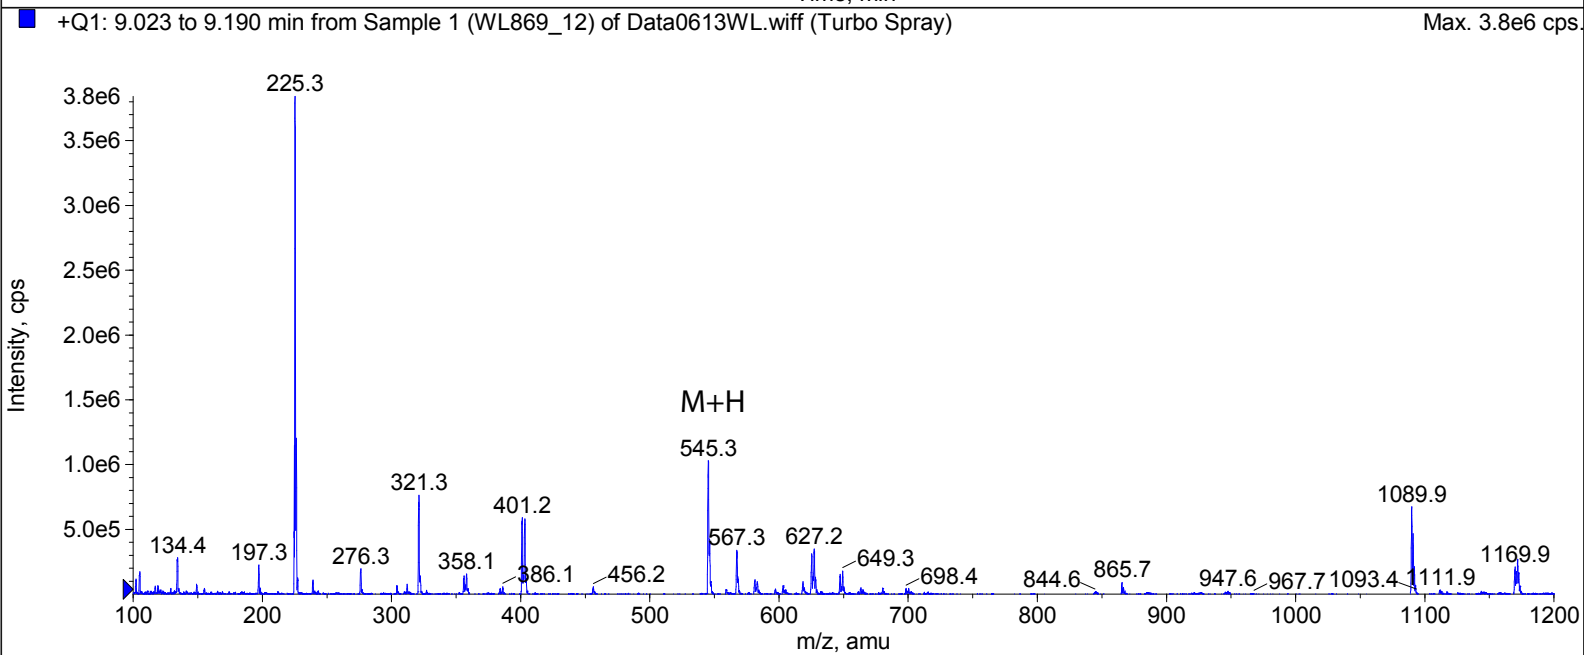

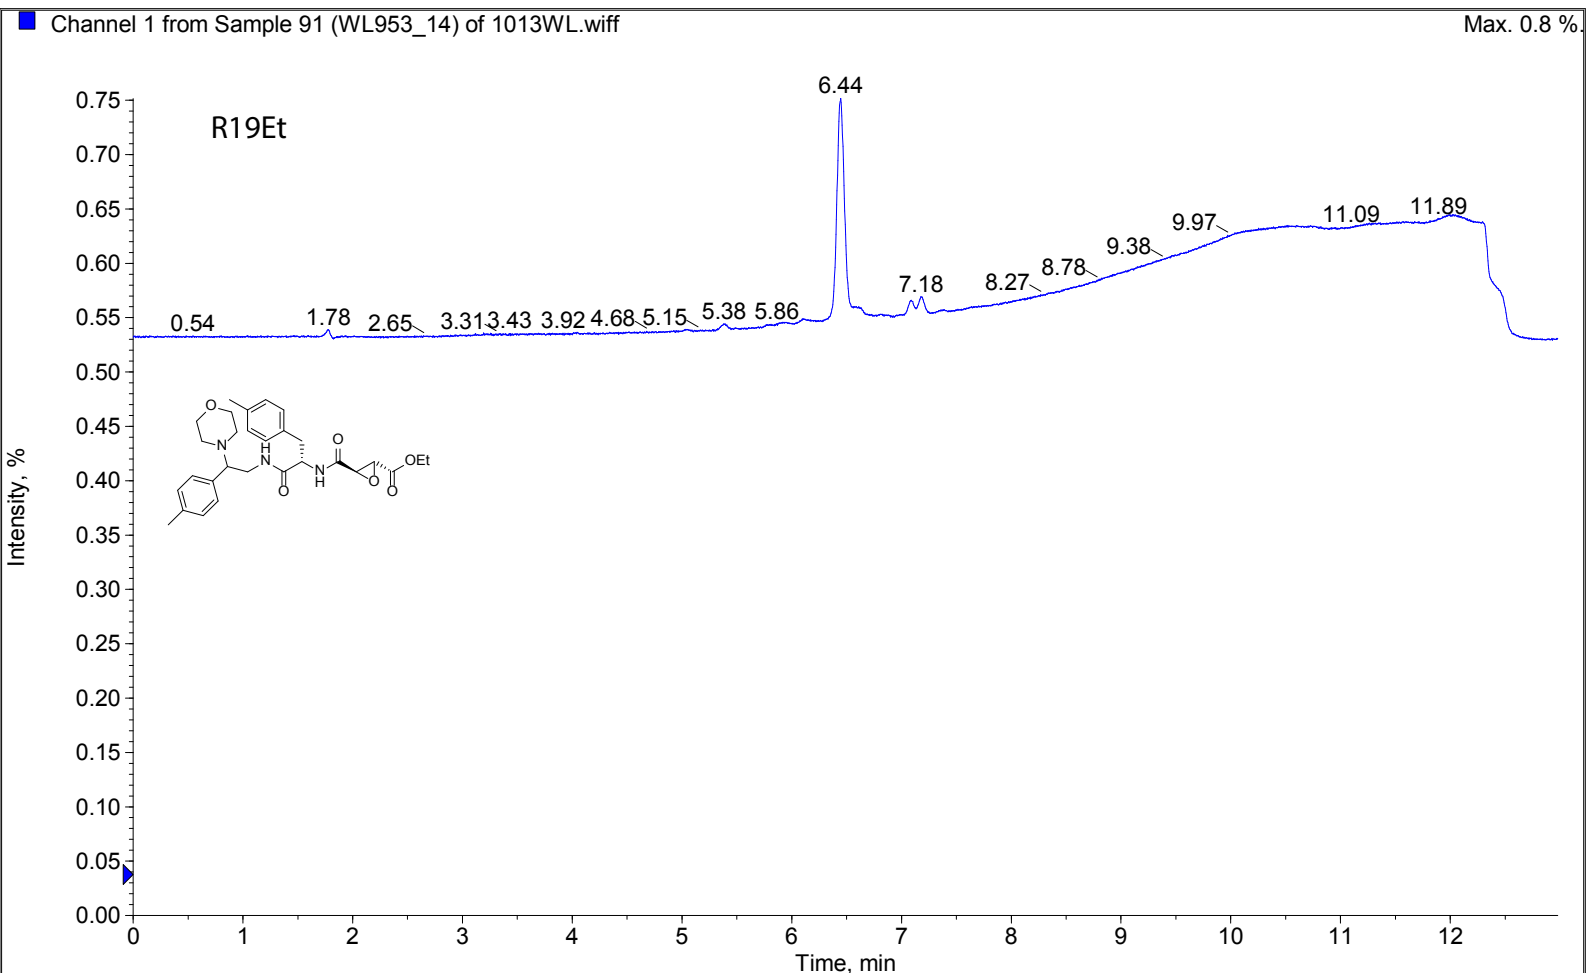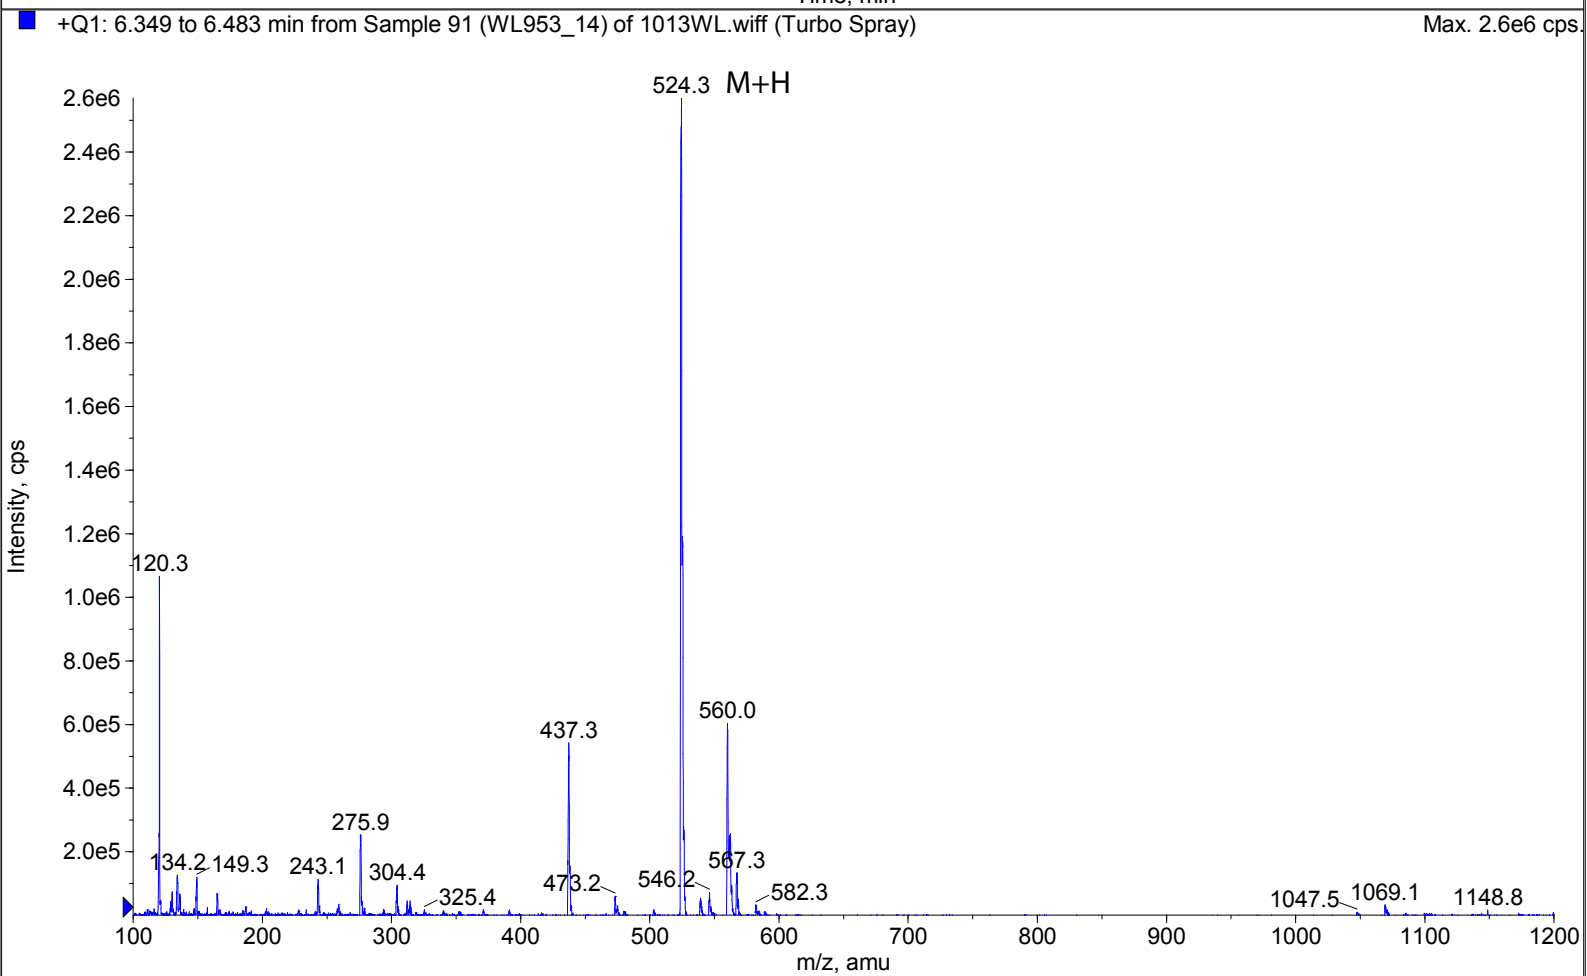

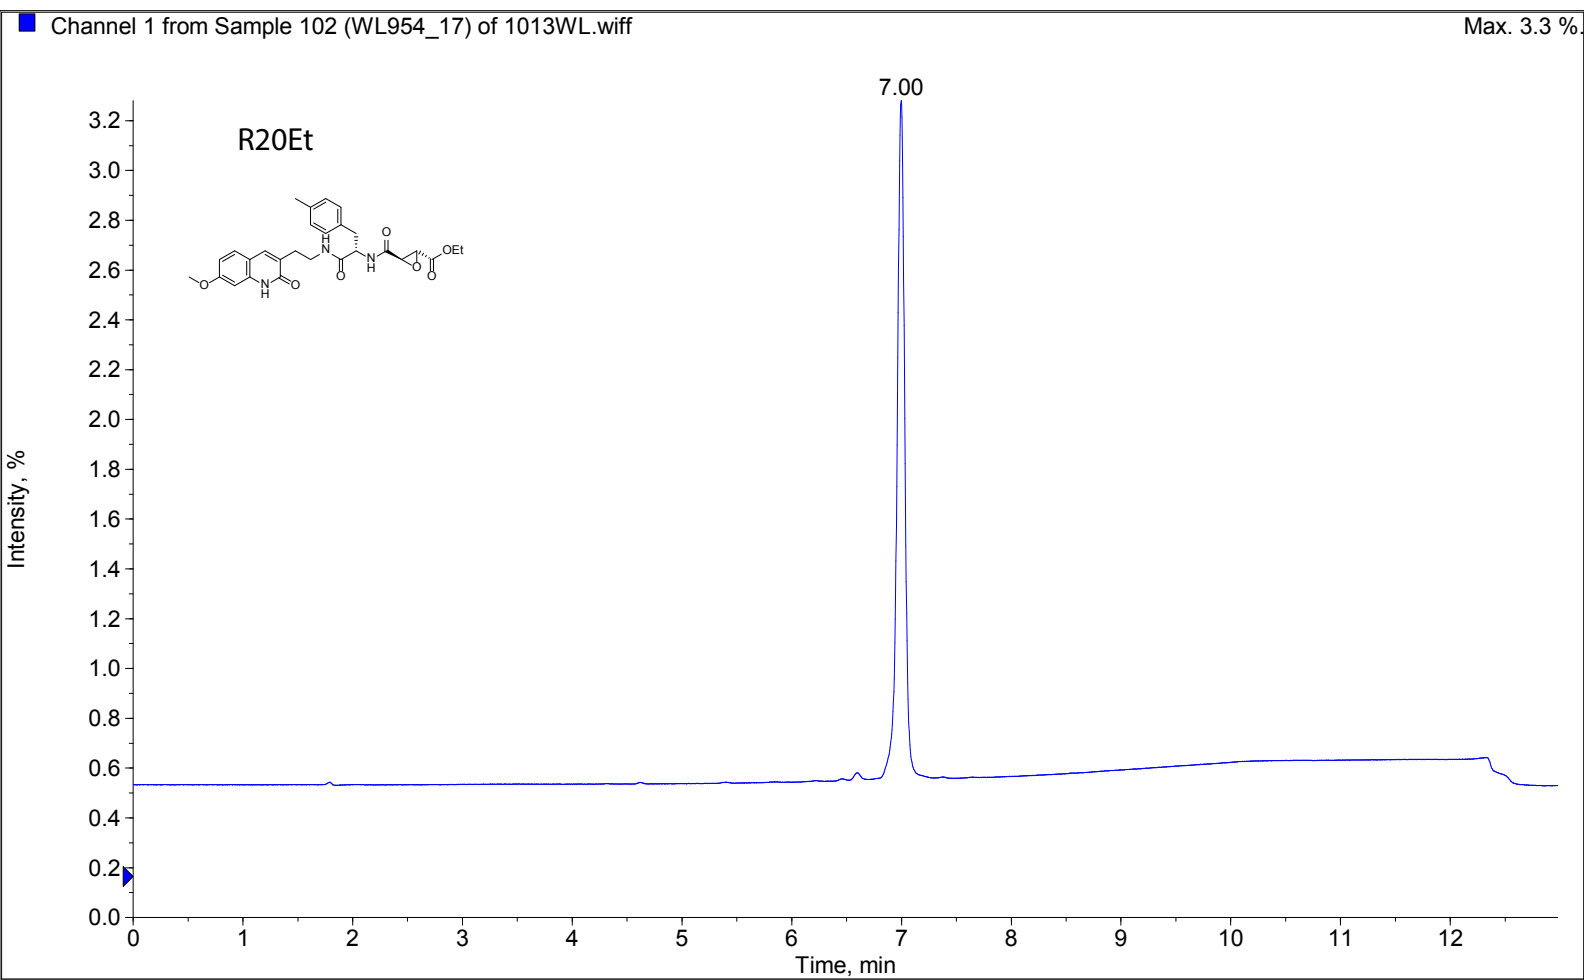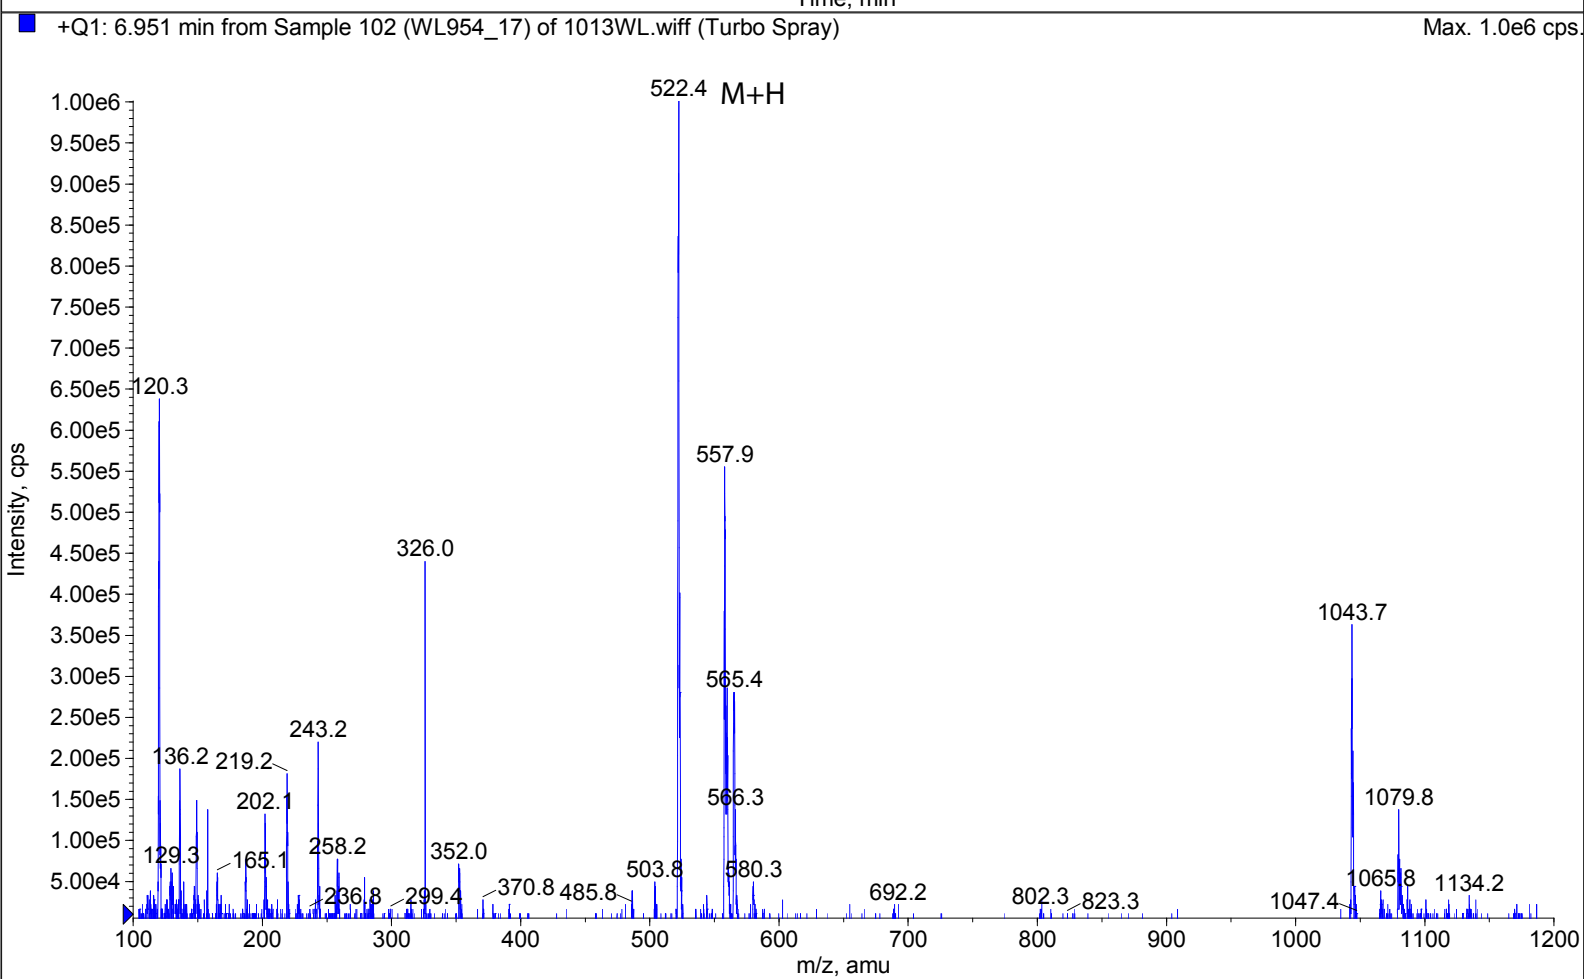

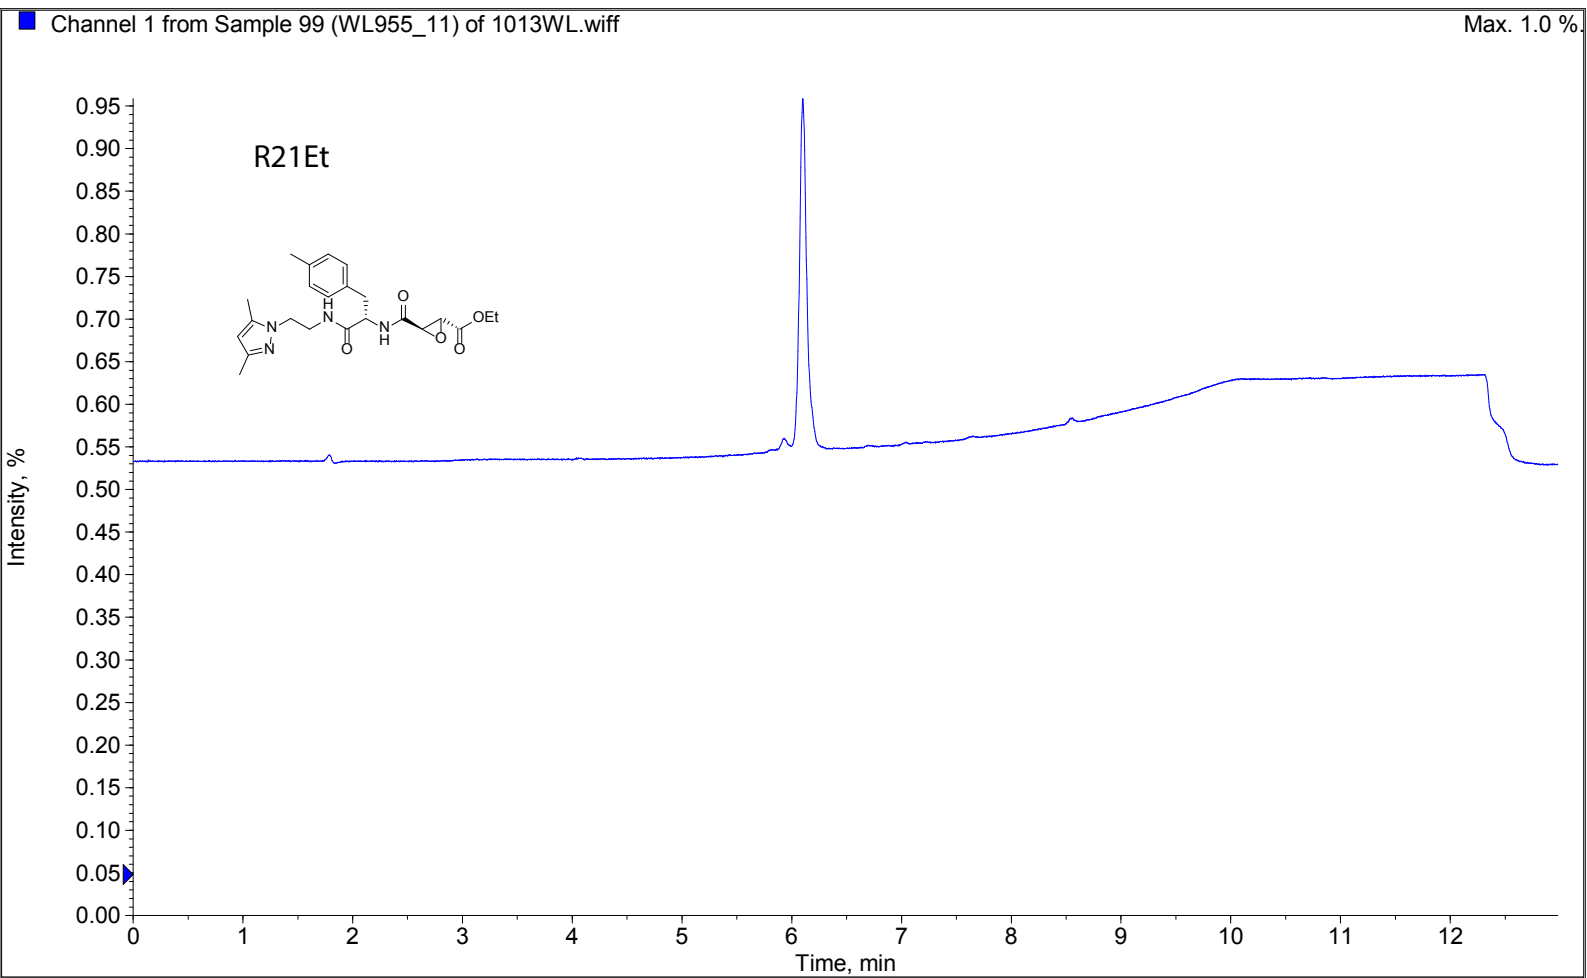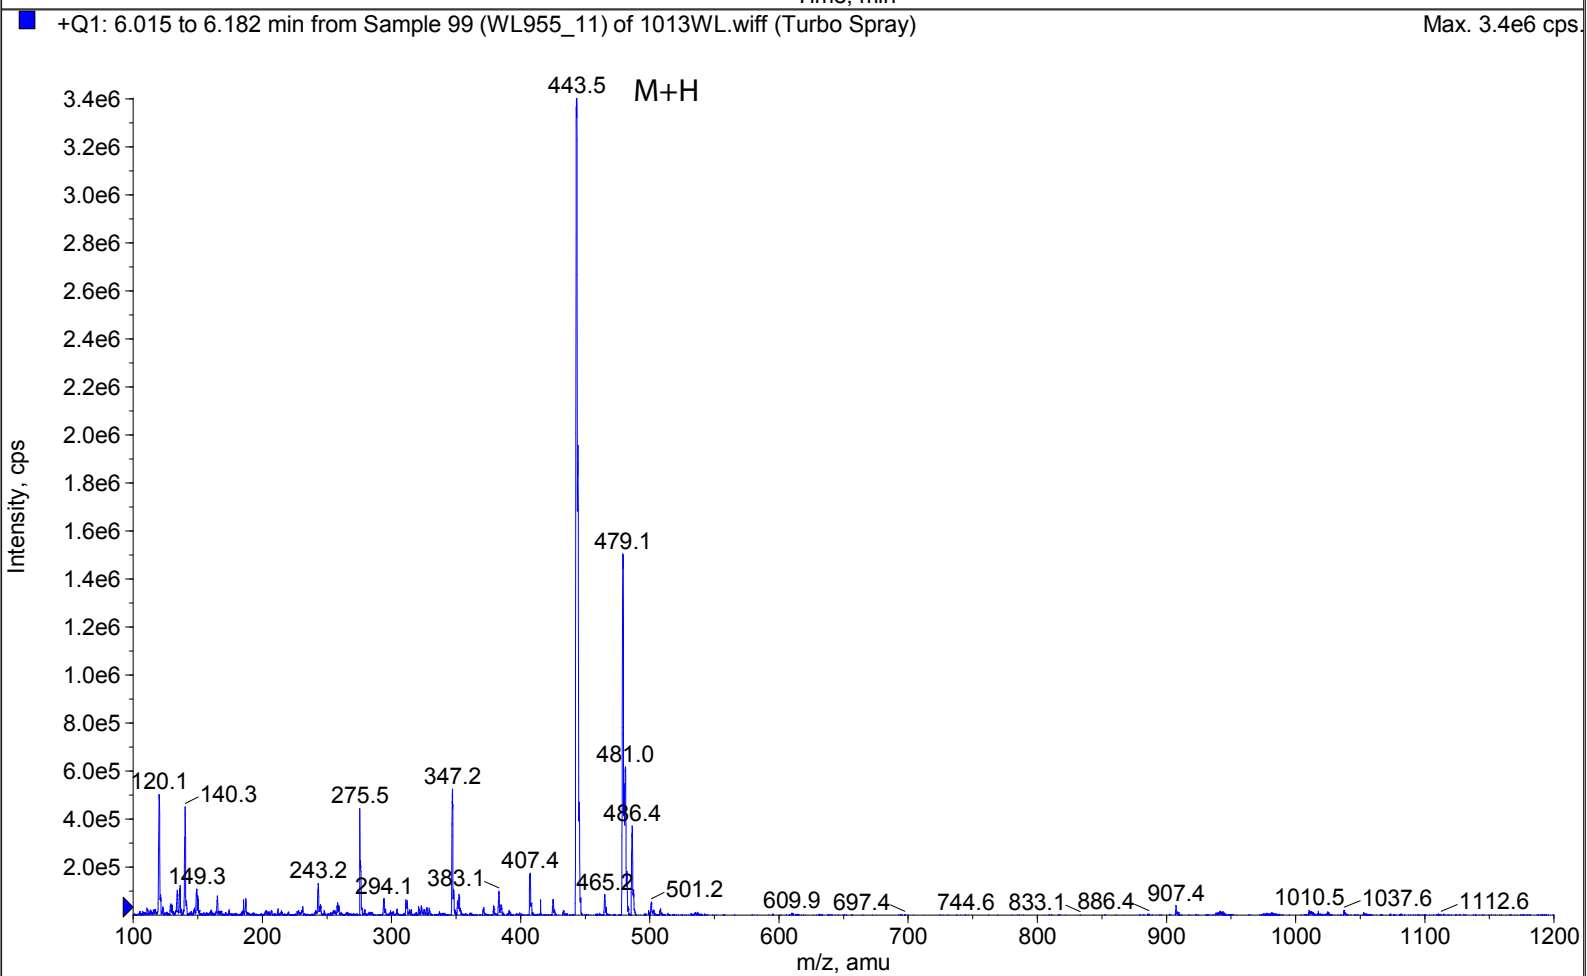



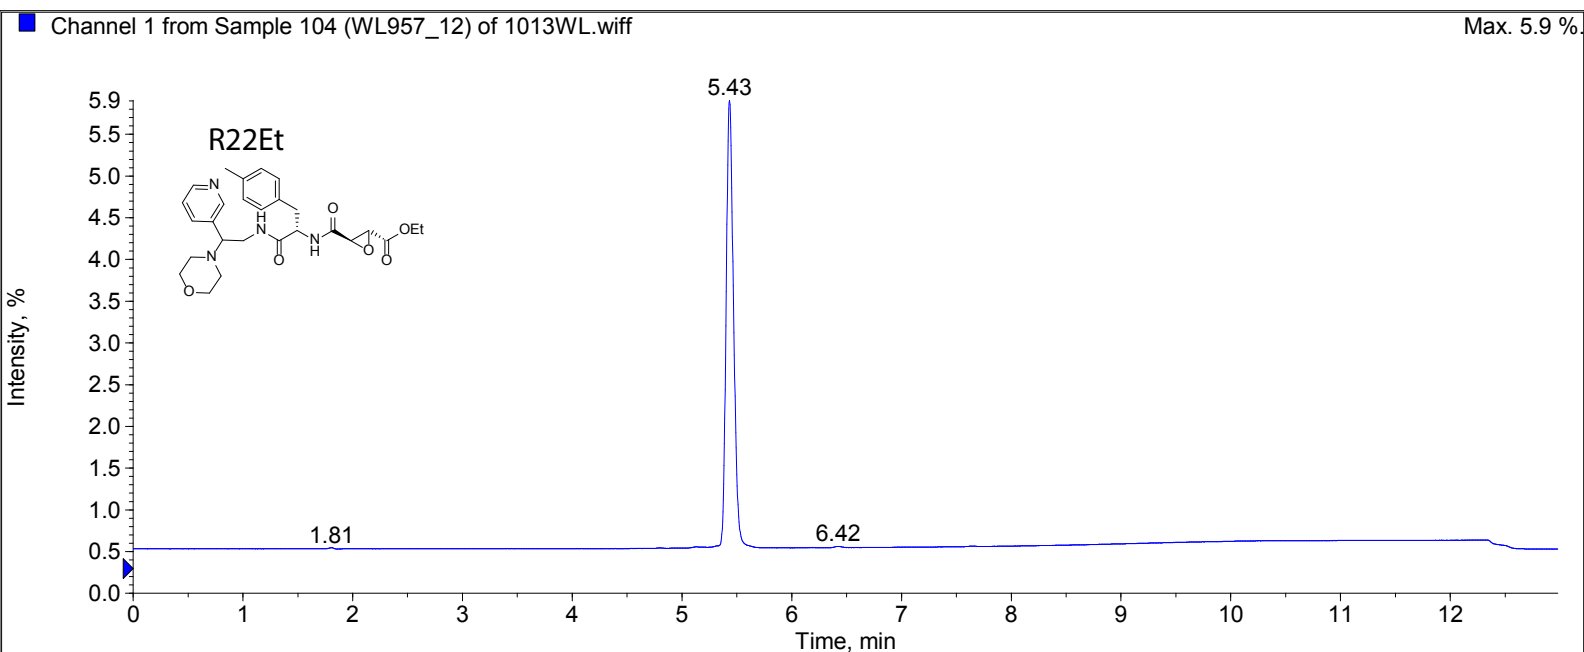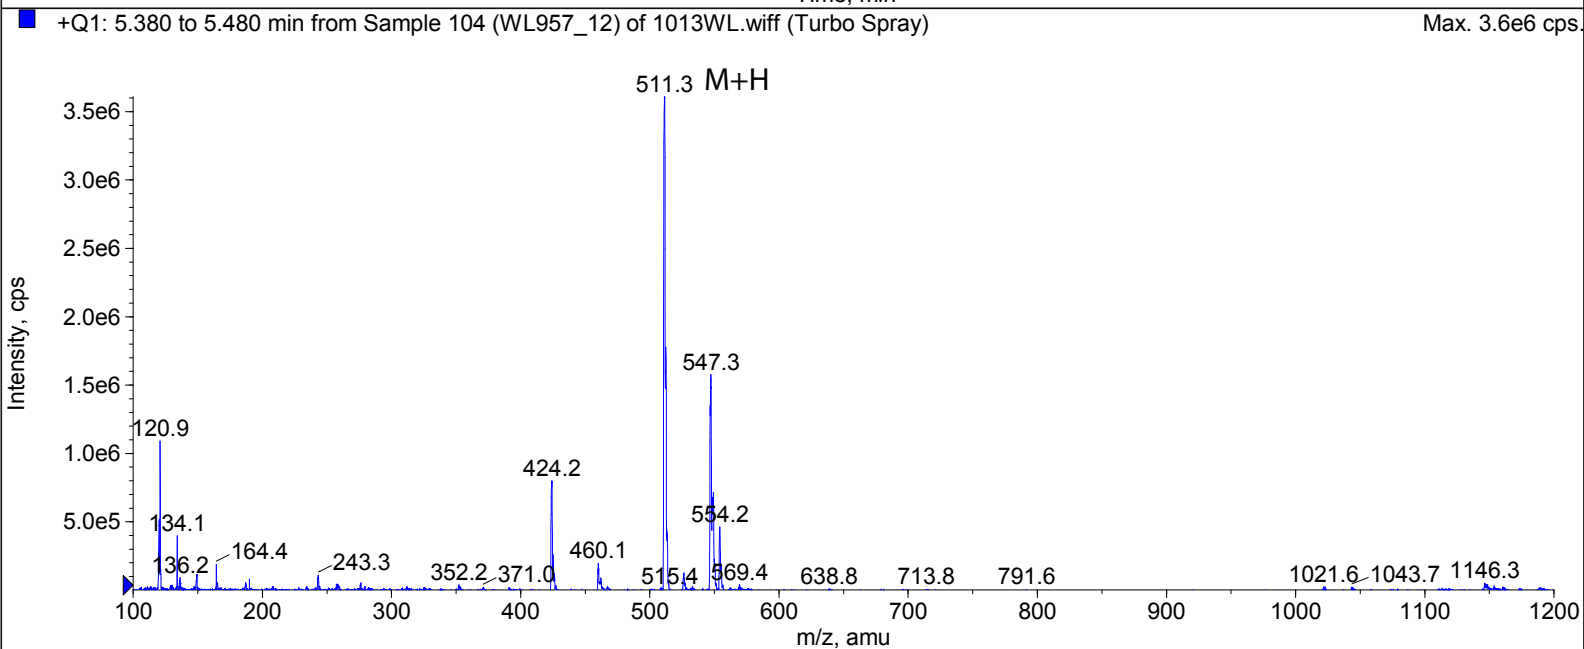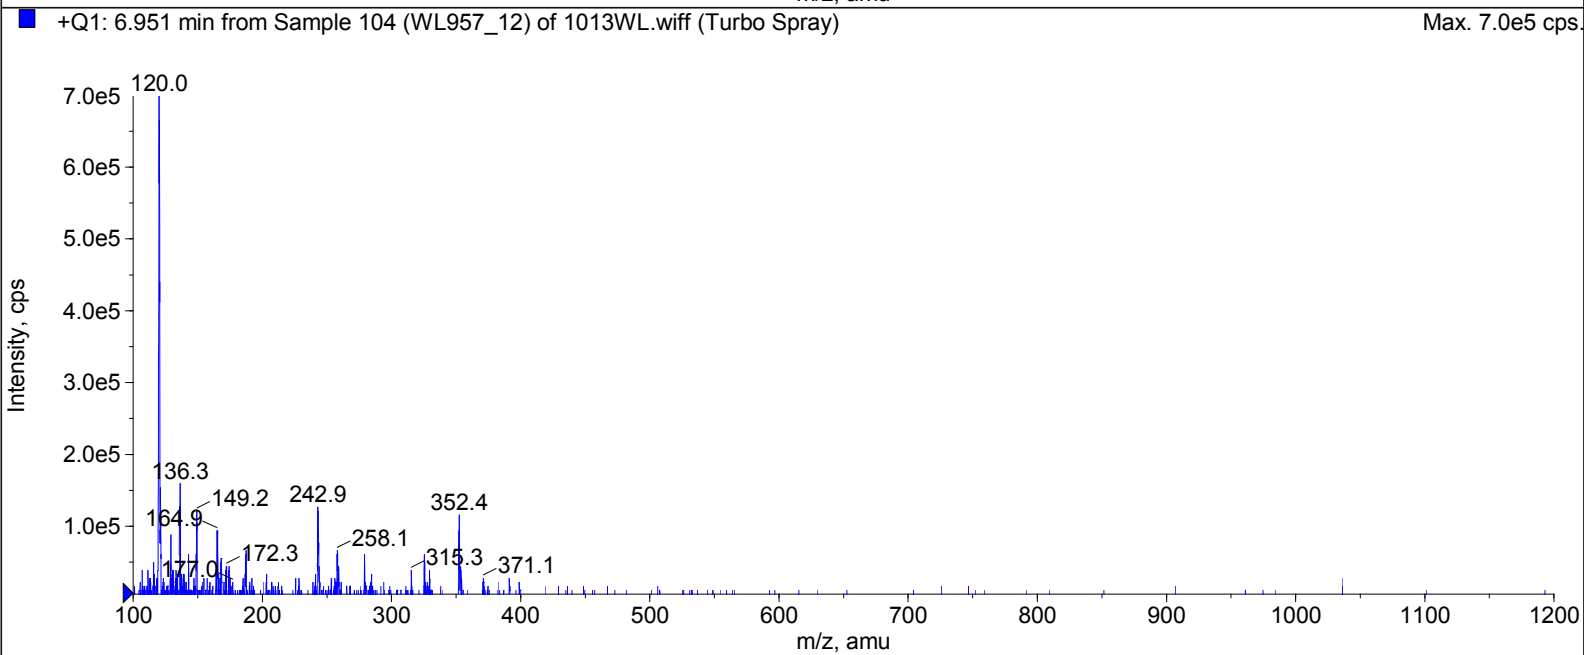

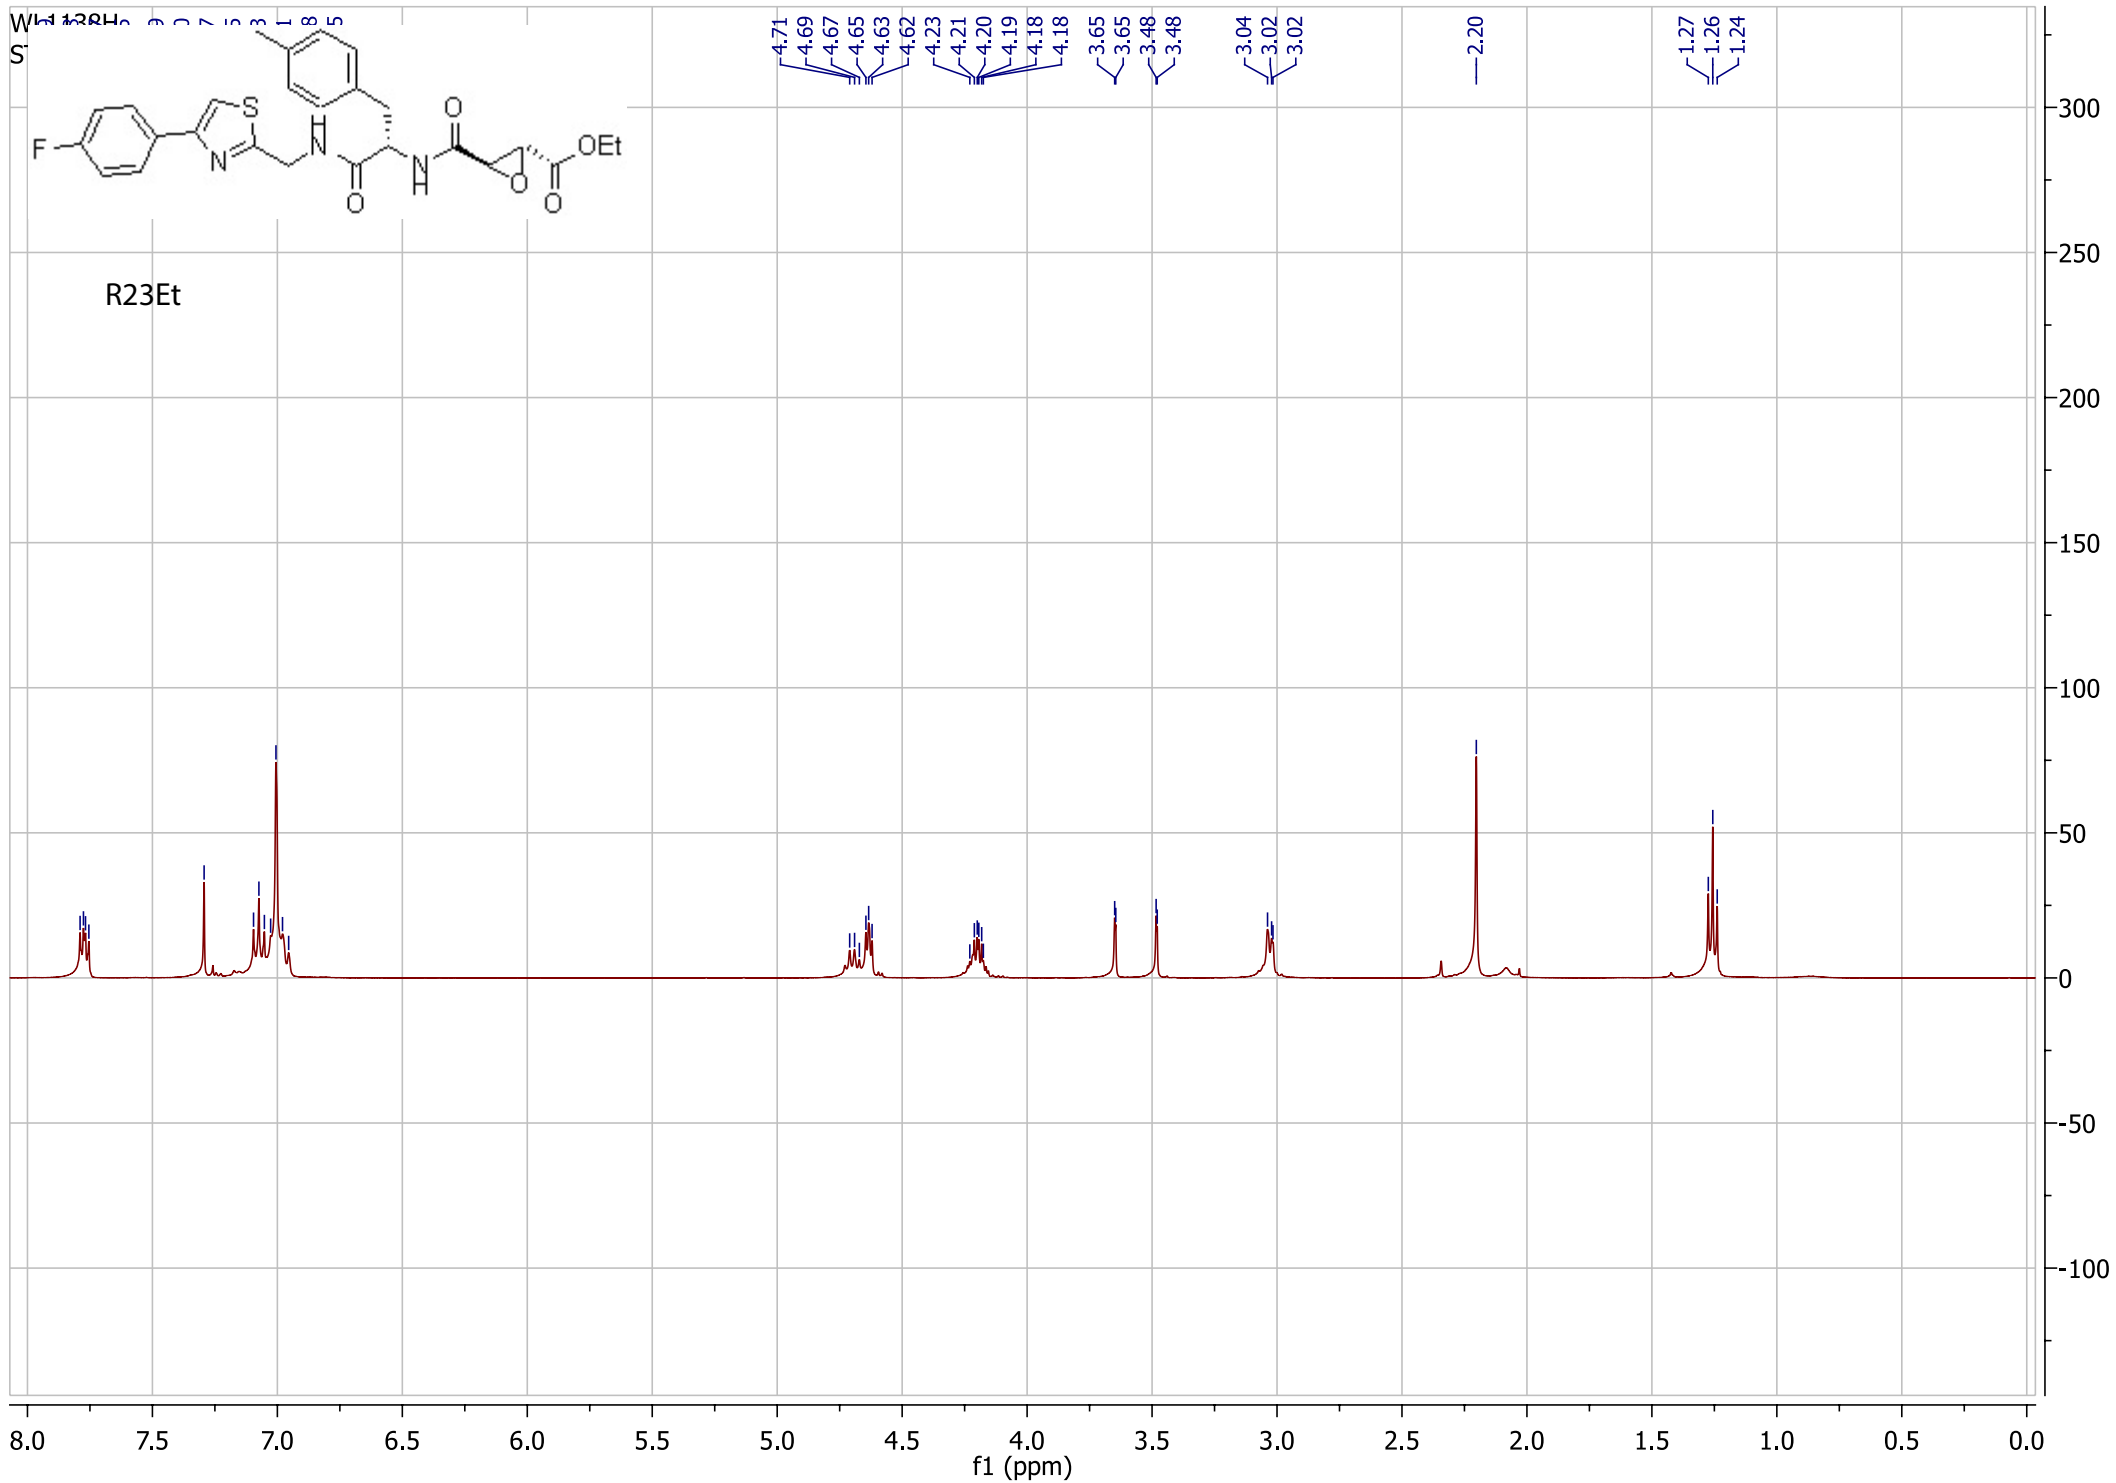

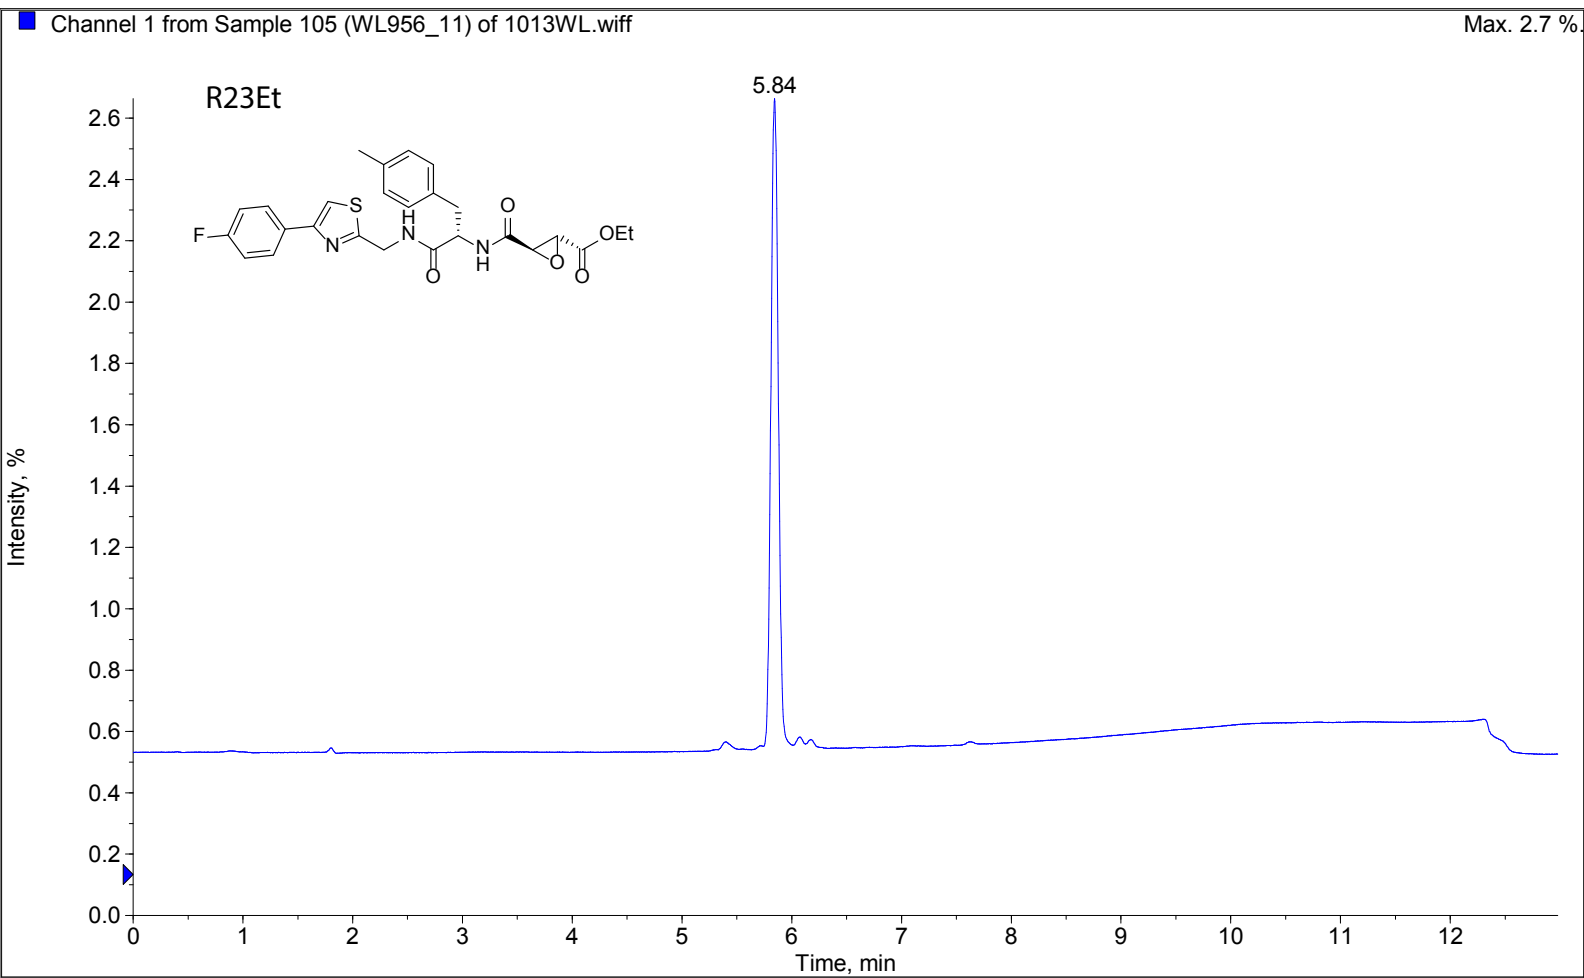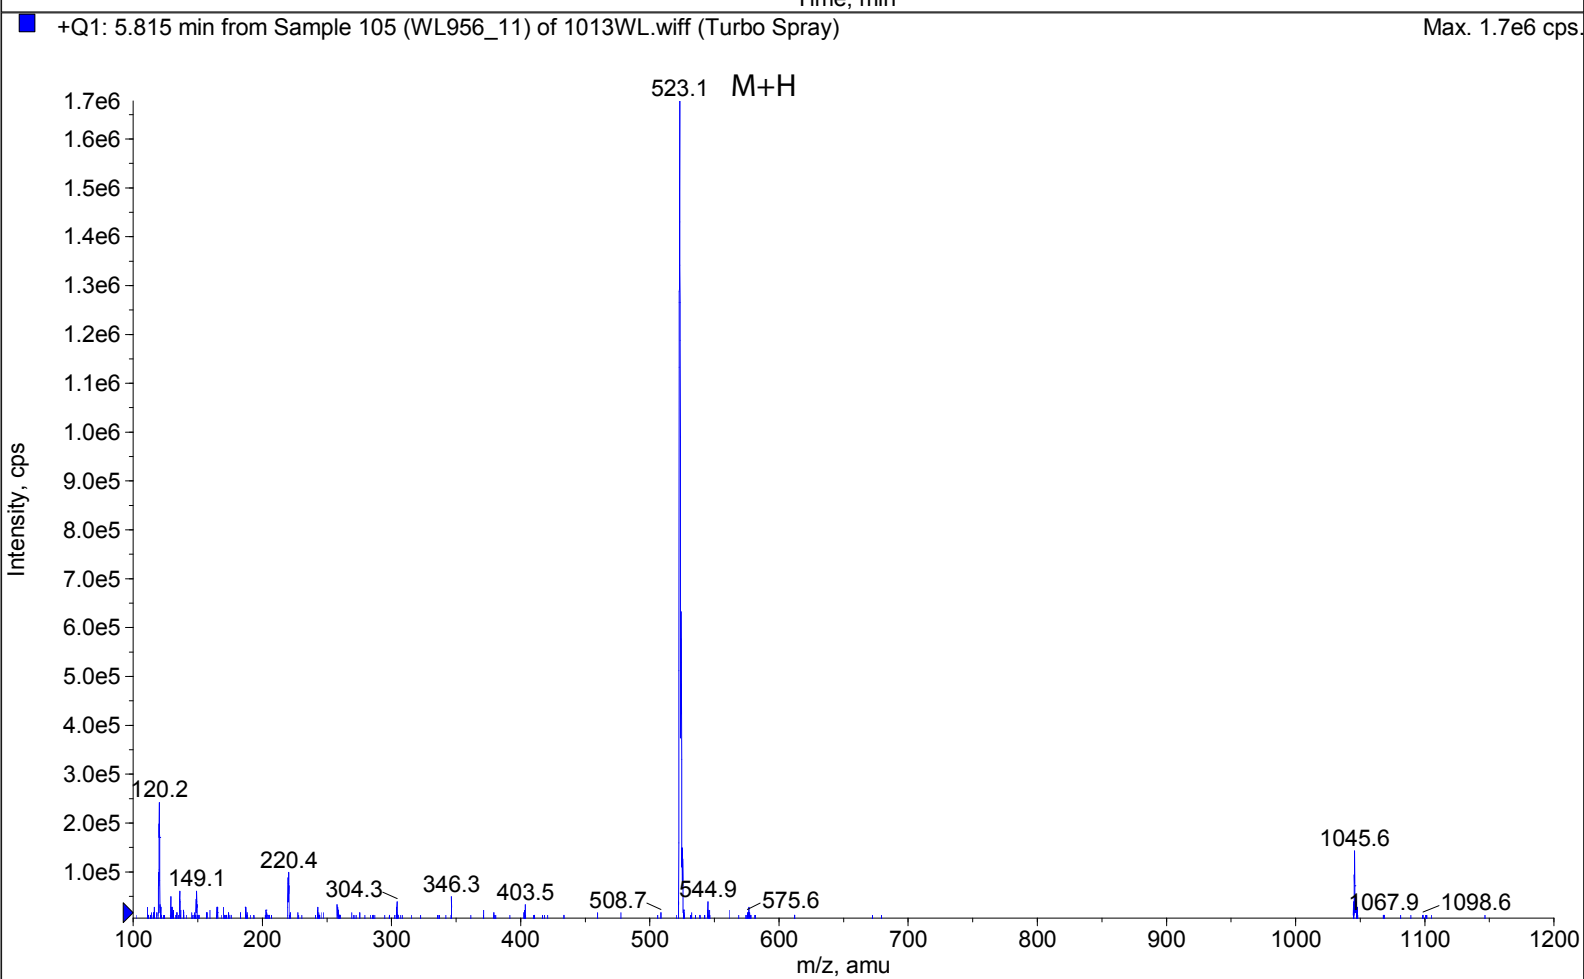

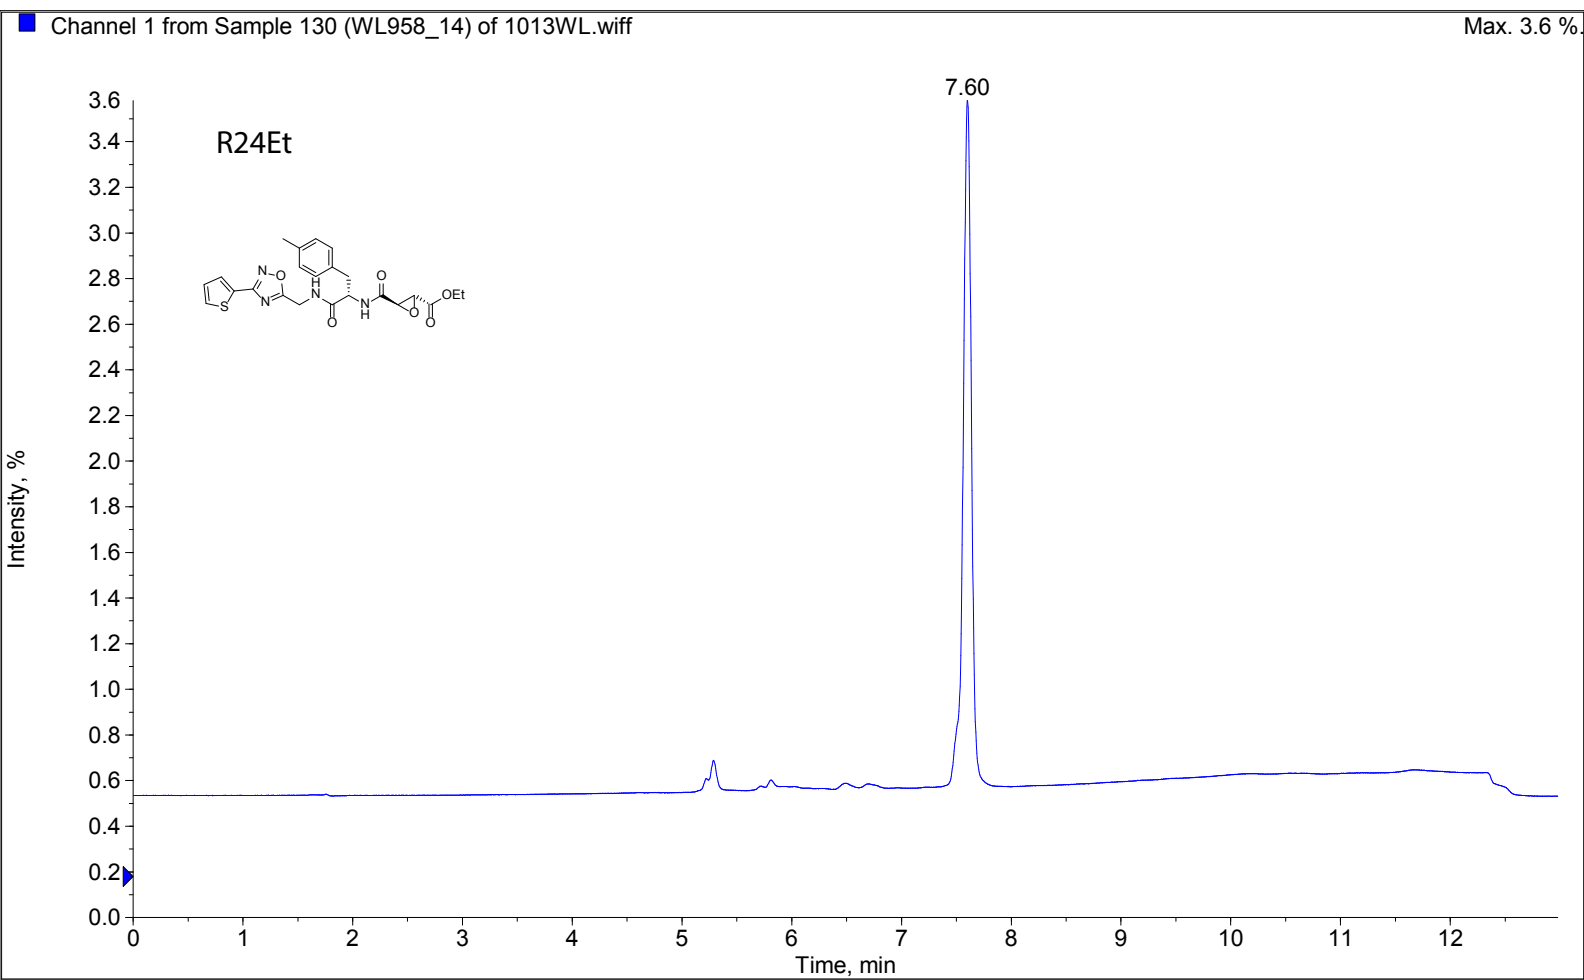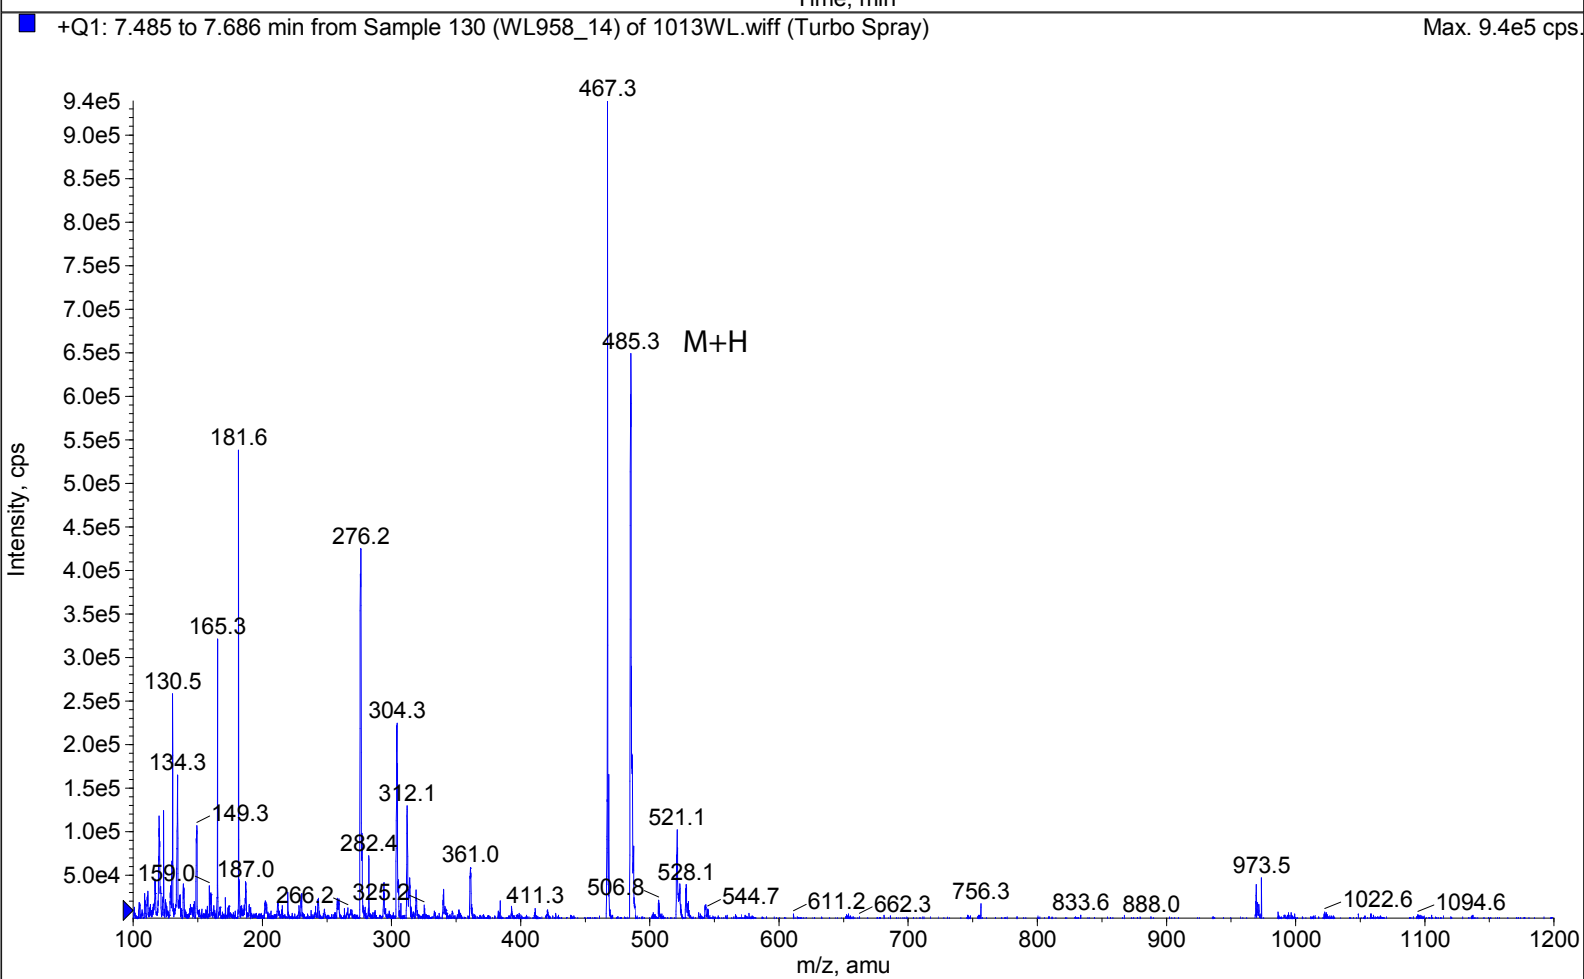

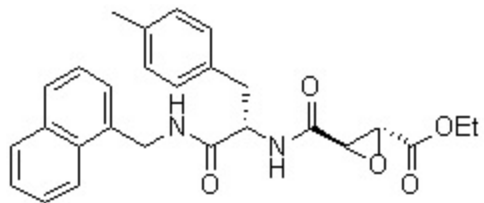

AMS36

7.81  
7.80  
7.79  
7.78  
7.73  
7.71  
7.70  
7.70  
7.69  
7.44  
7.44  
7.43  
7.42  
6.89  
6.87  
6.86  
6.84  
6.78  
6.76

5.76  
5.75  
5.74  
4.72  
4.70  
4.64  
4.63  
4.61  
4.46  
4.45  
4.44  
4.43  
4.21  
4.20  
4.20  
4.19  
4.18  
4.17  
4.16  
4.16  
4.14  
3.54  
3.54  
3.36  
3.36  
2.99  
2.97  
2.95  
2.94  
2.88  
2.86  
2.85  
2.83

2.17

1.26  
1.24  
1.22

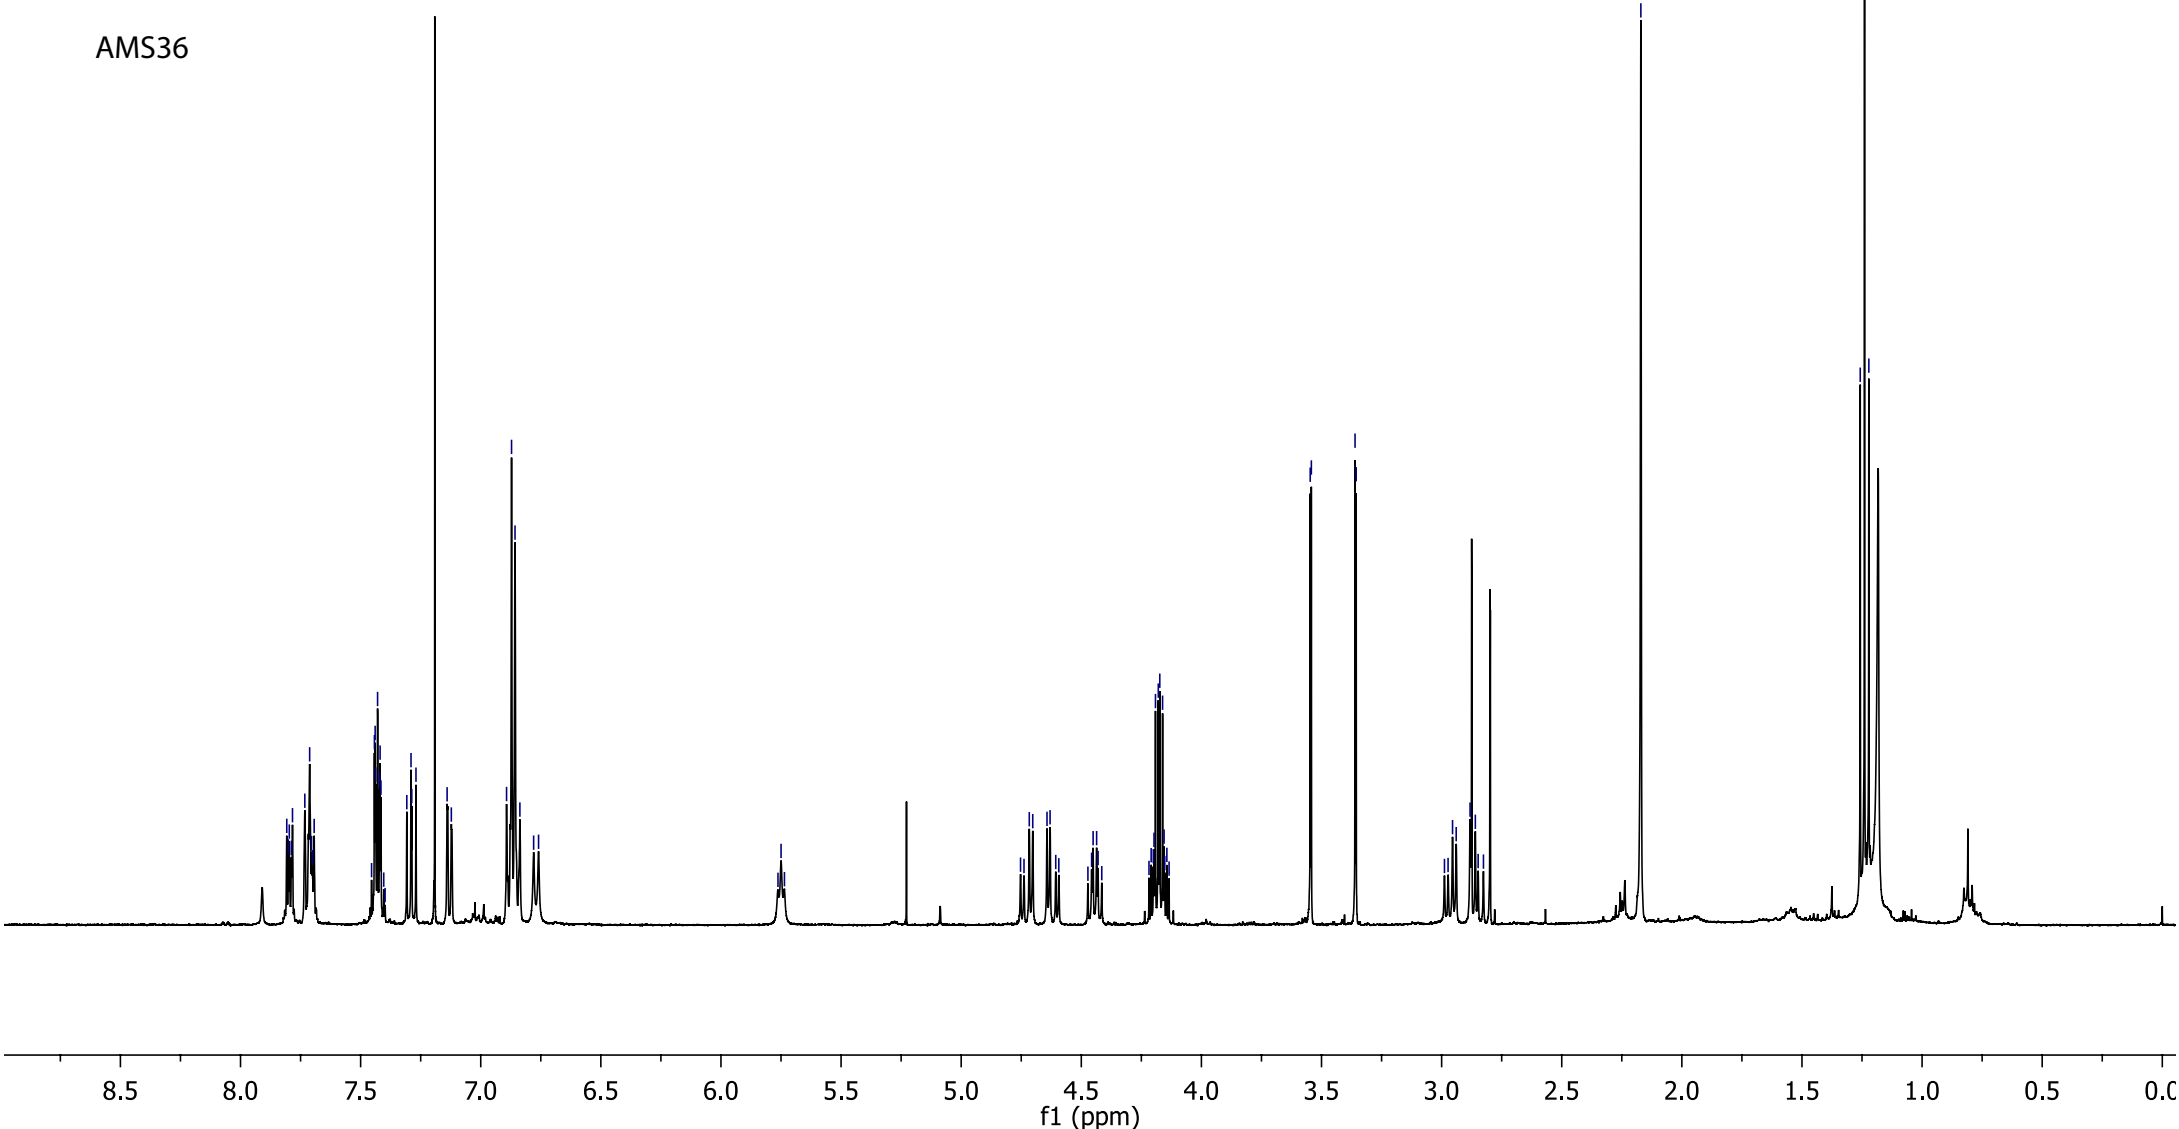

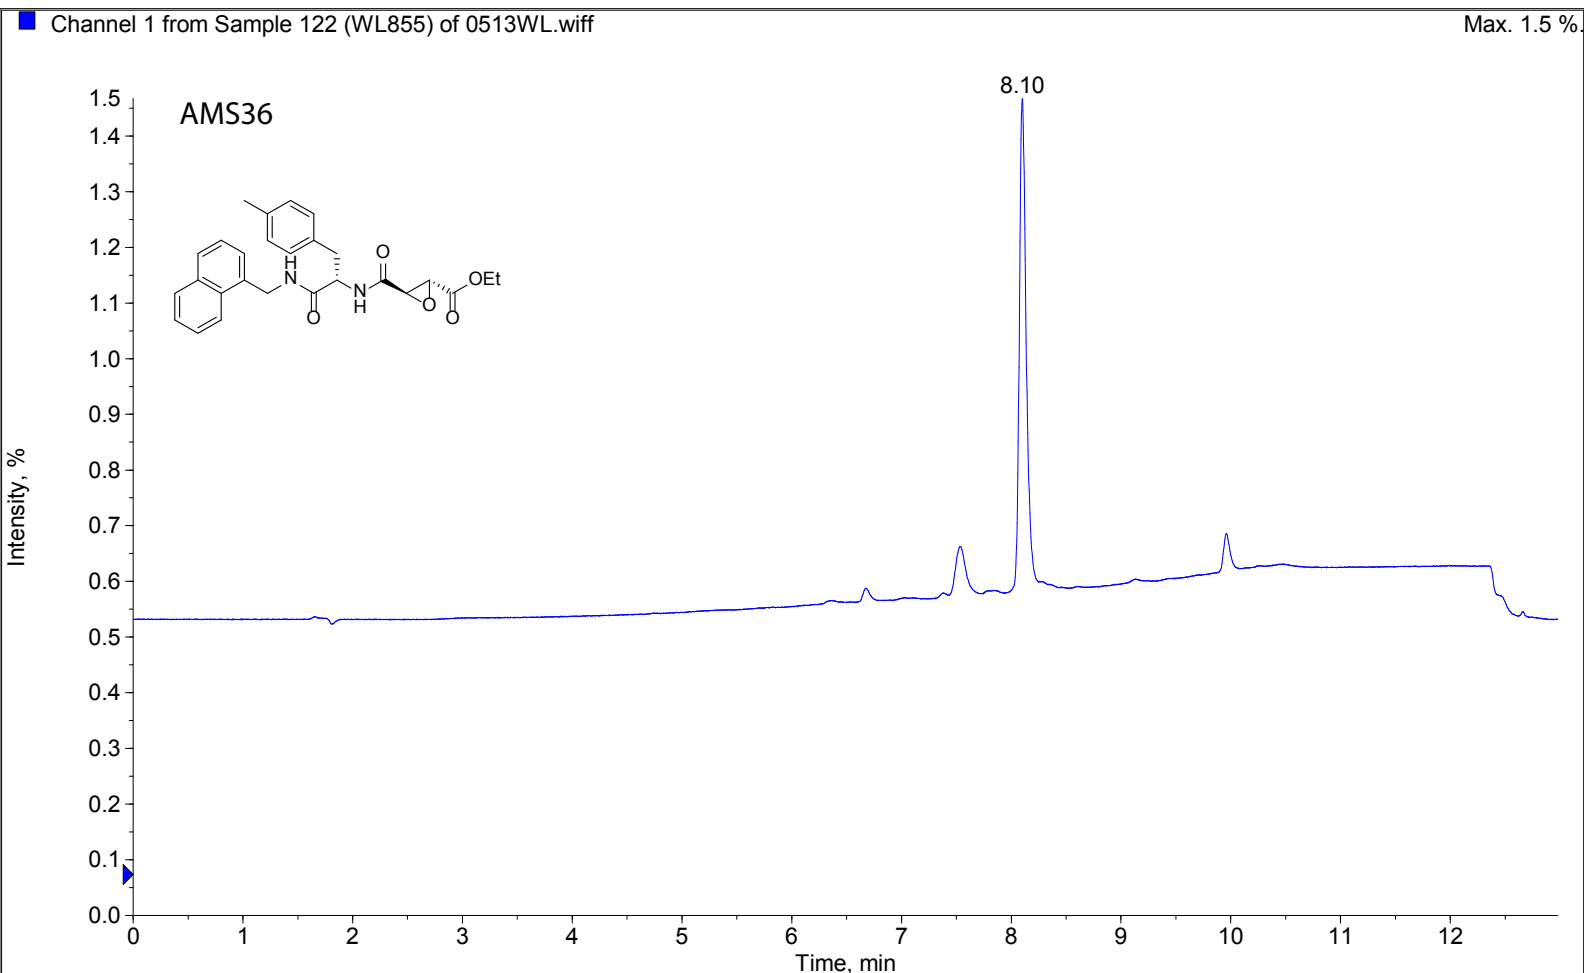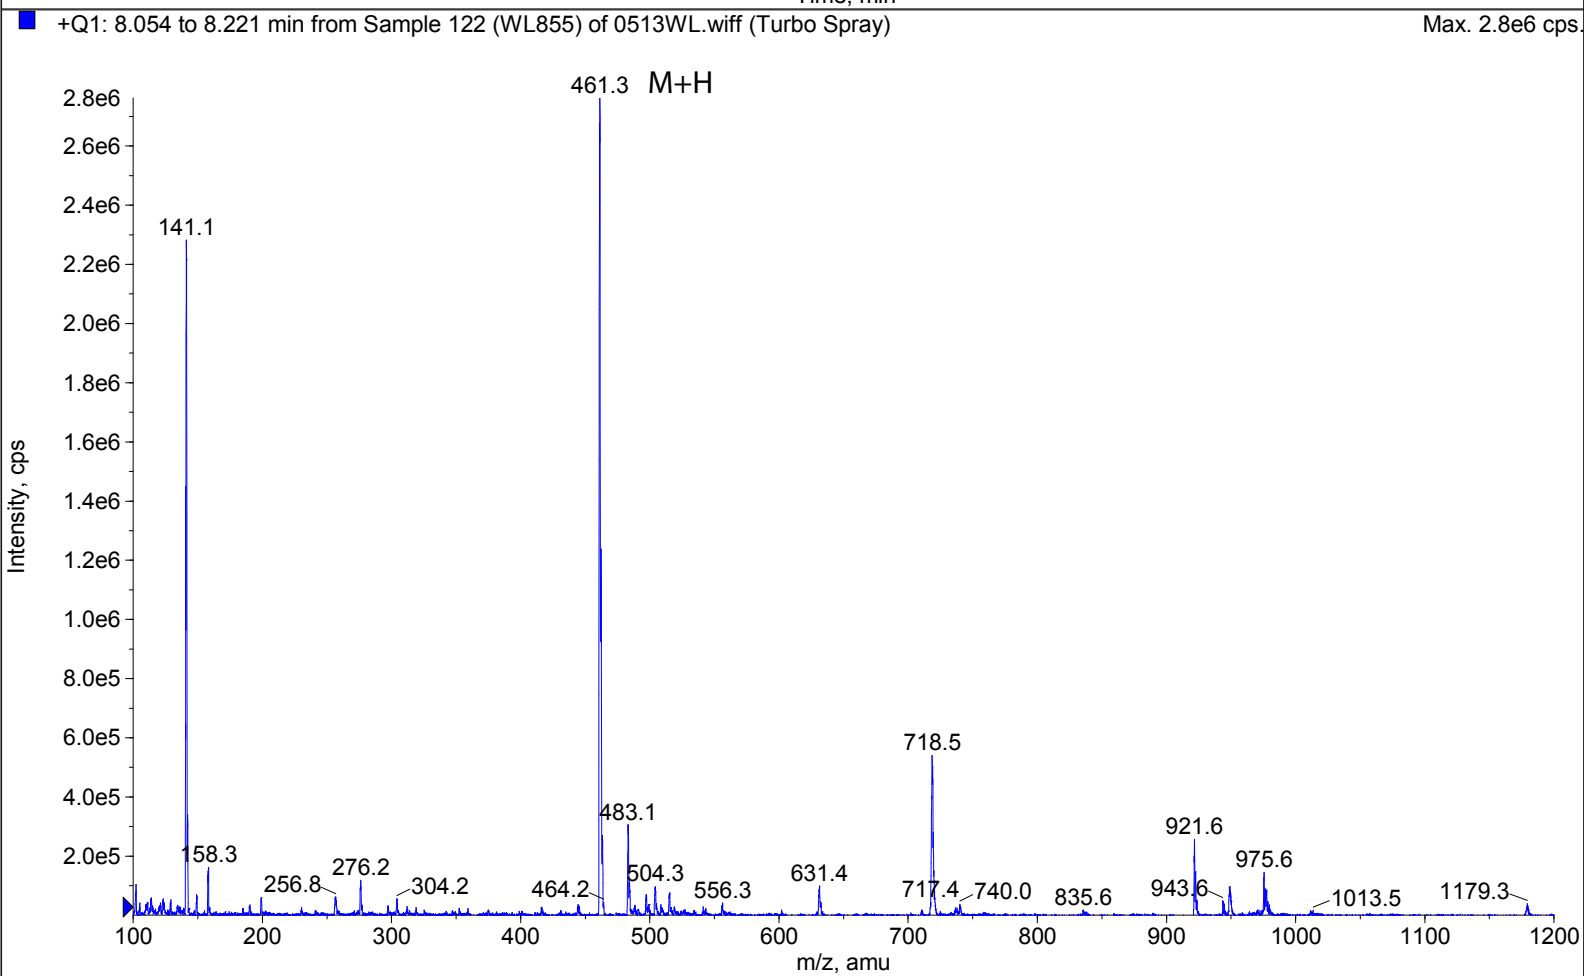

7.81  
7.80  
7.80  
7.79  
7.78  
7.77  
7.76  
7.75  
7.74  
7.72  
7.45  
7.44  
7.44  
7.43  
6.91  
6.89  
6.88  
6.85  
6.66  
6.64

5.91

4.80  
4.79  
4.77  
4.75  
4.70  
4.69  
4.66  
4.65  
4.51  
4.49  
4.47  
4.45  
4.18  
4.18  
4.17  
4.16  
4.15  
4.14  
4.14  
3.46  
3.46  
3.03  
3.00  
3.00  
2.96  
2.94  
2.93  
2.91  
2.89  
2.88  
2.86  
2.19

1.24  
1.23  
1.21

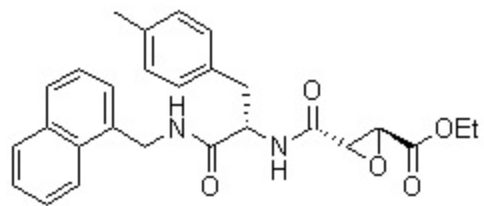

SS-AMS36

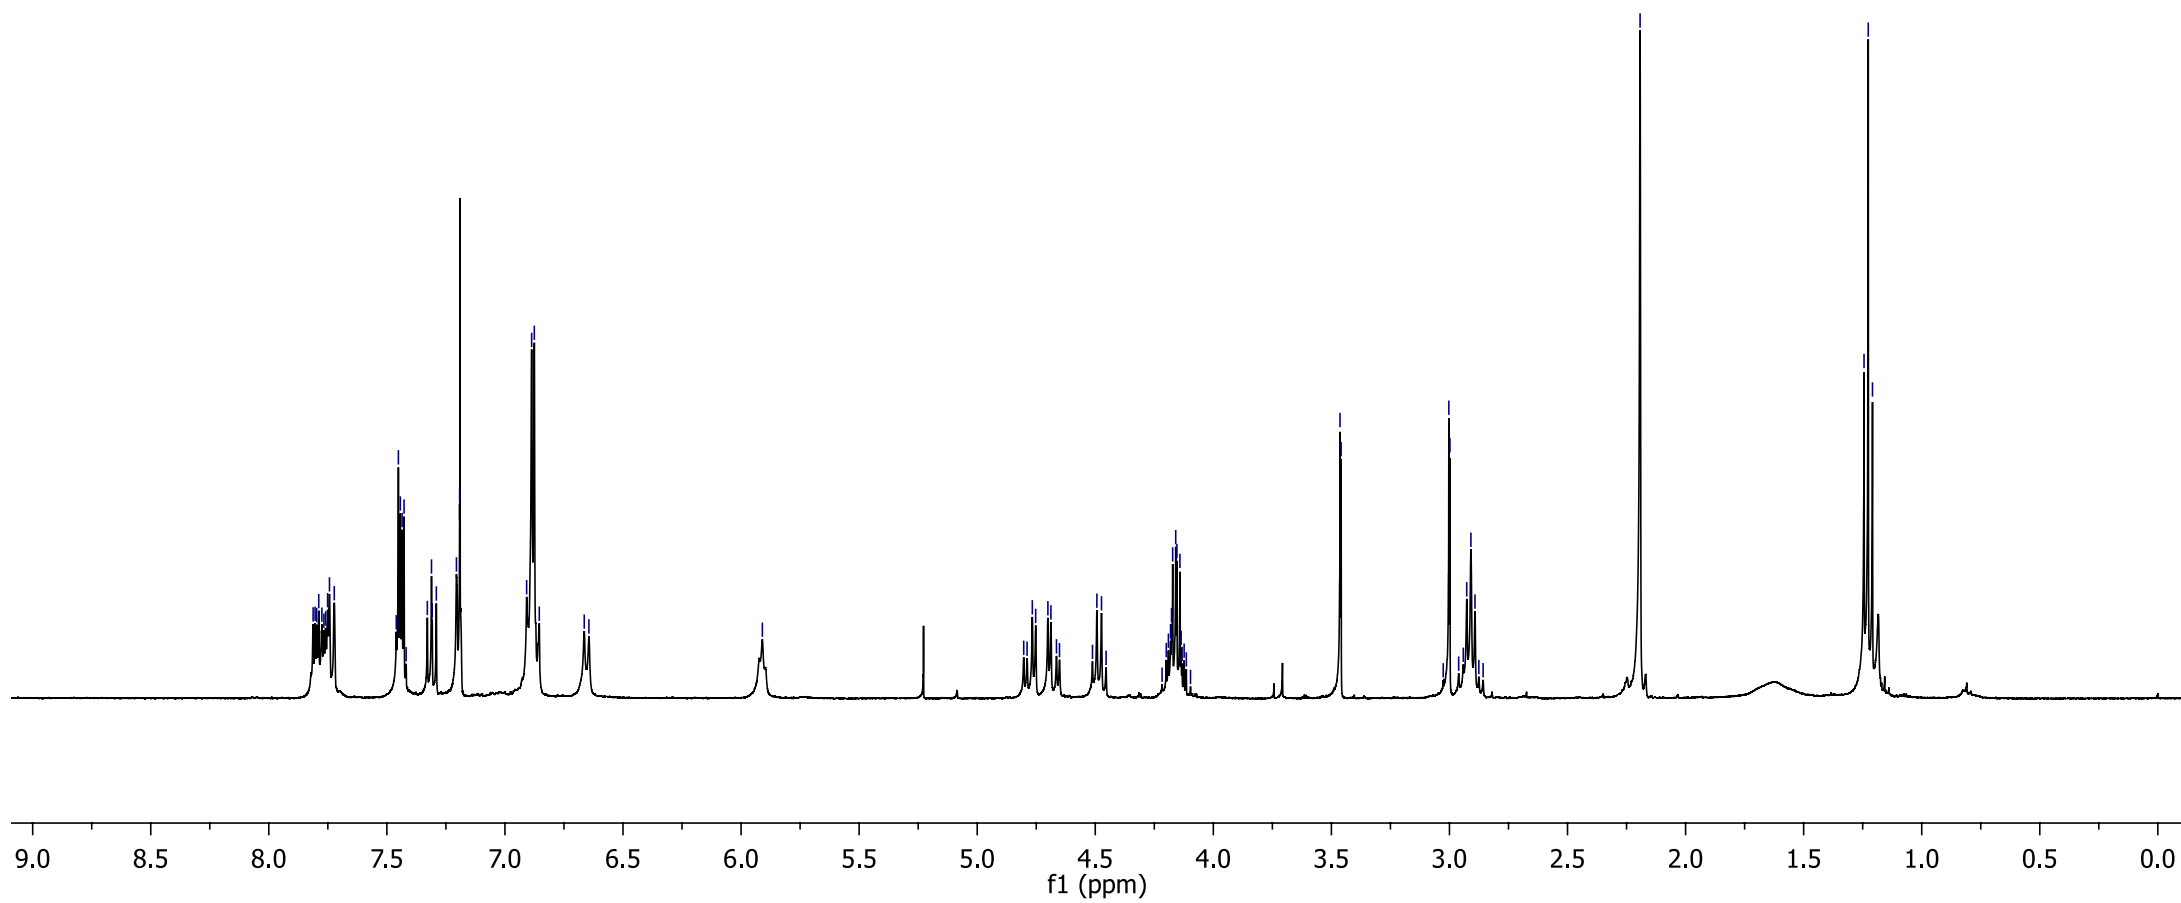

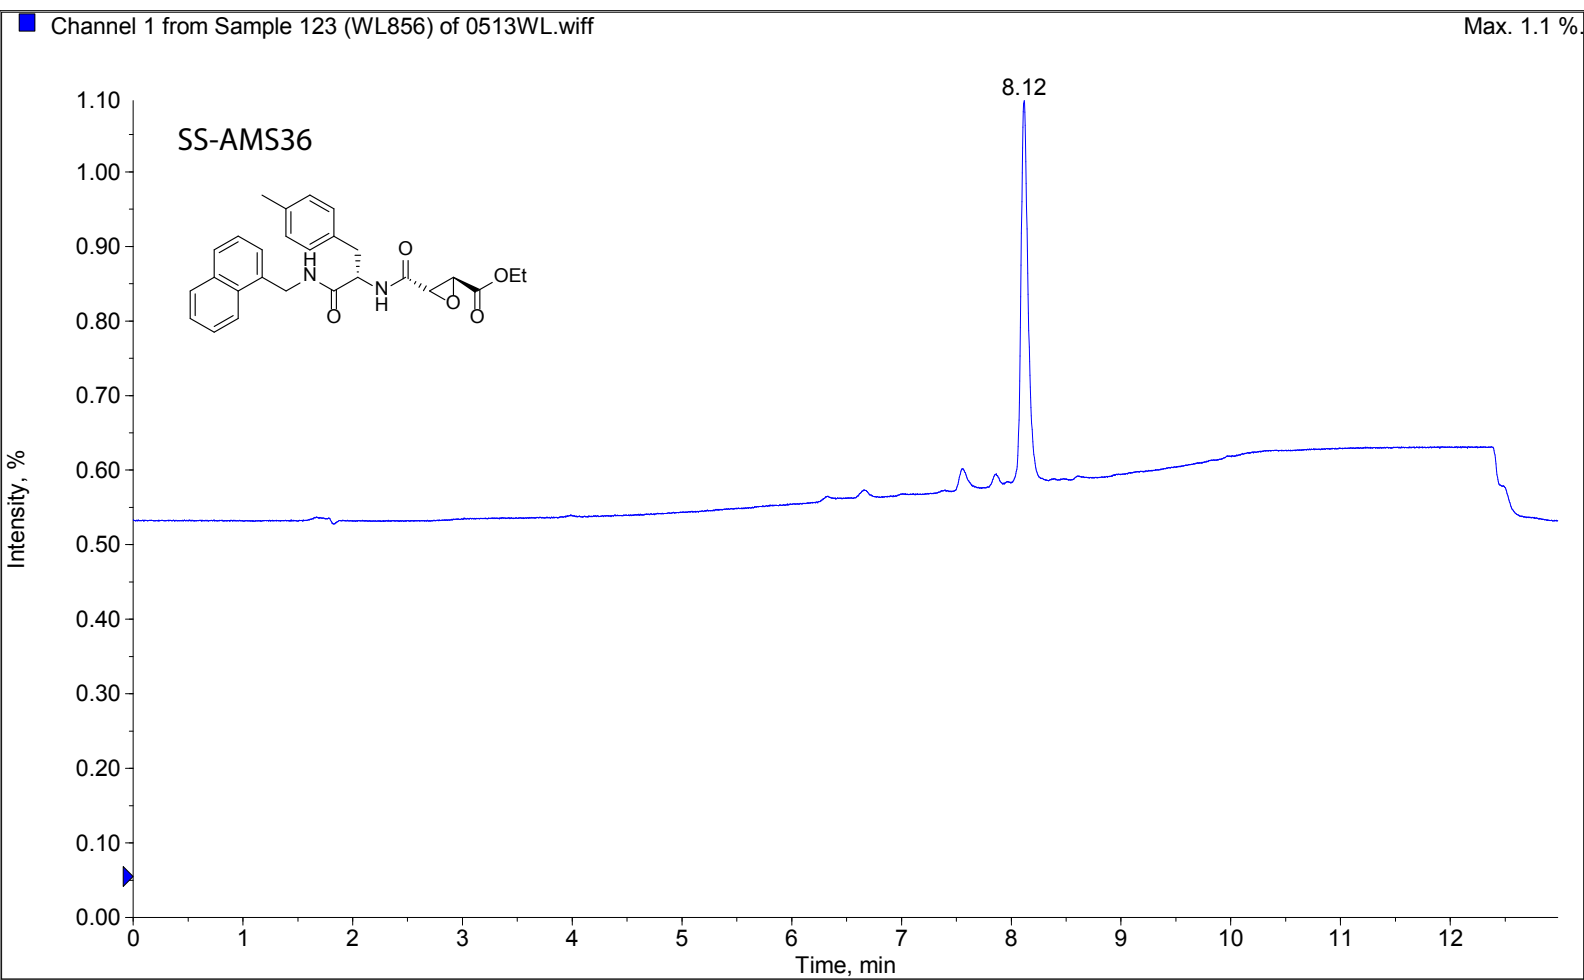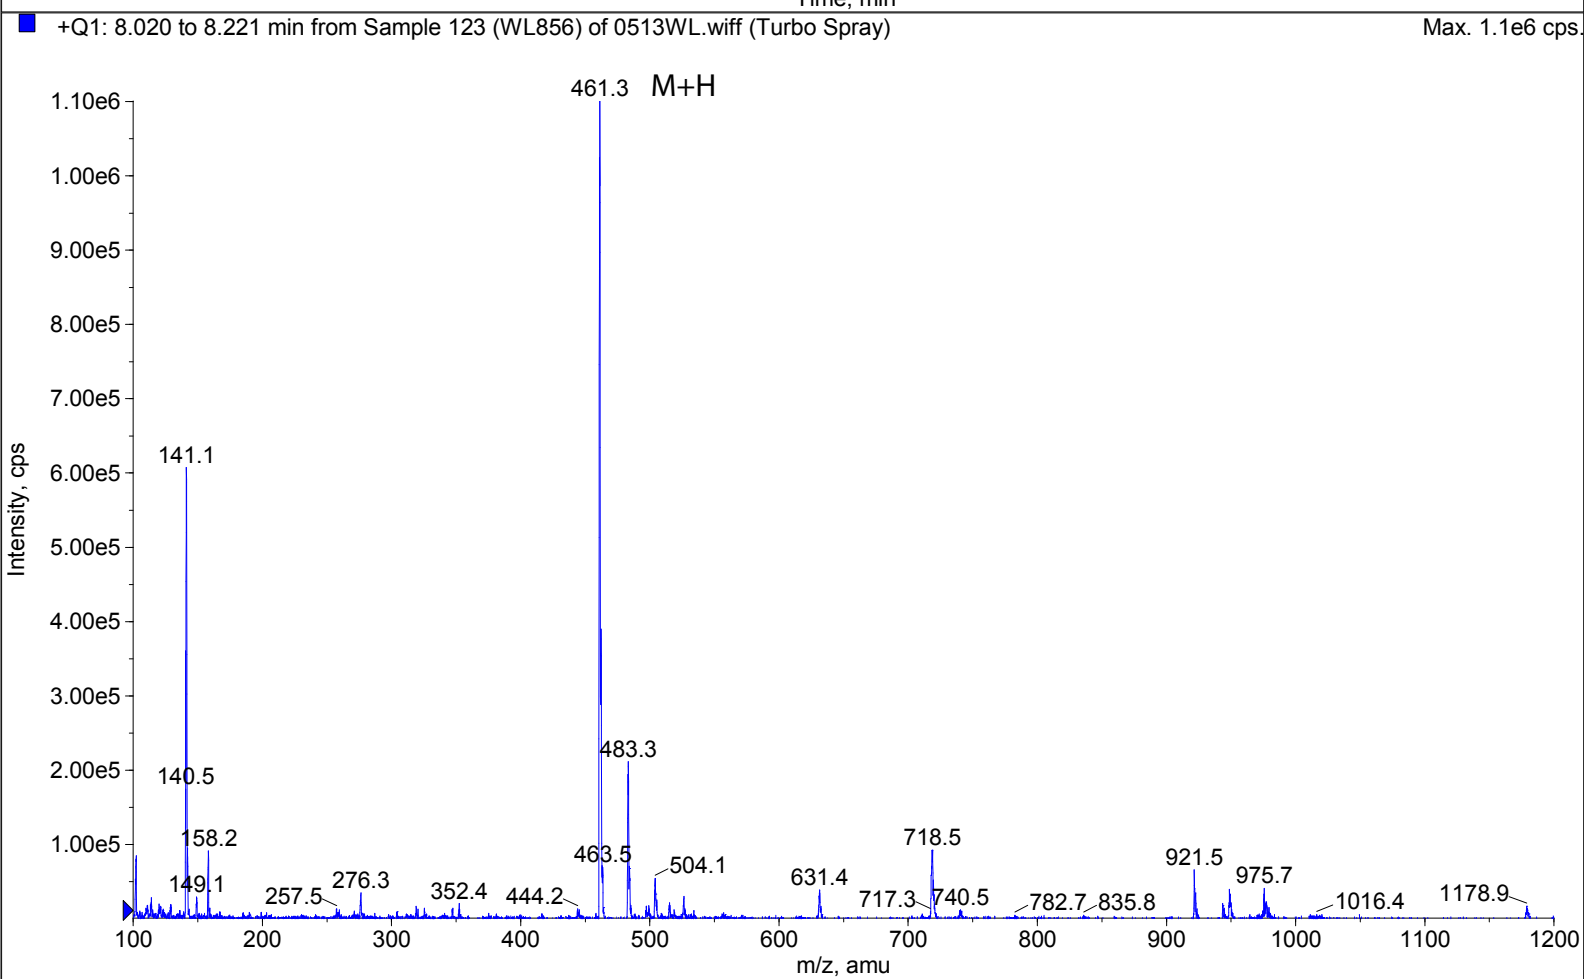



Channel 1 from Sample 47 (R1H) of 0114WL.wiff

Max. 9.9 %

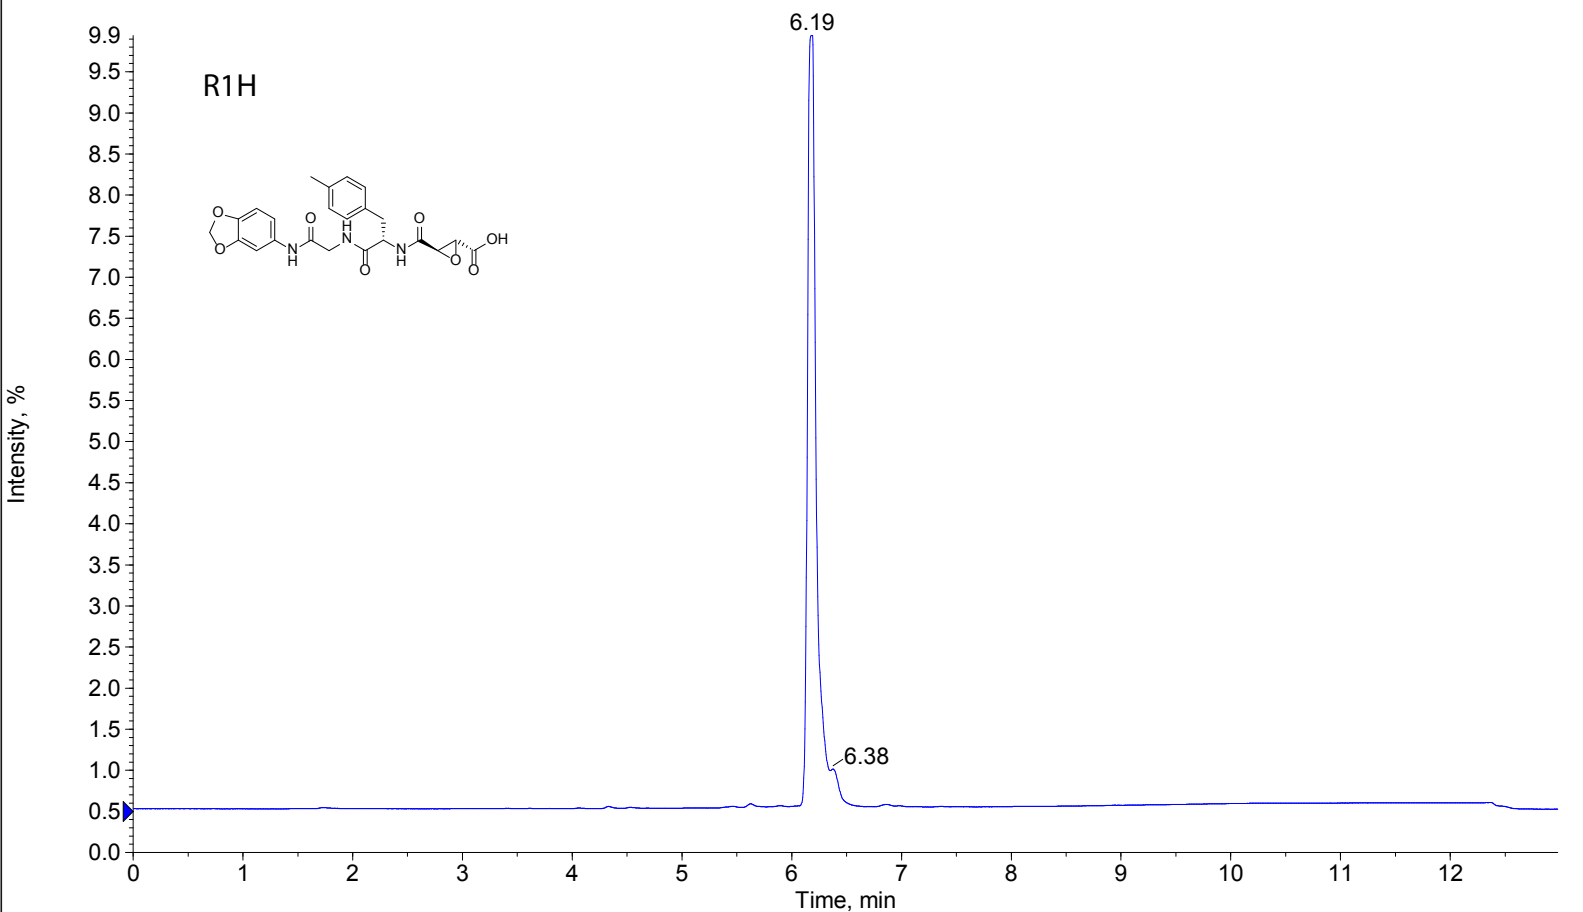

+Q1: 6.082 to 6.349 min from Sample 47 (R1H) of 0114WL.wiff (Turbo Spray)

Max. 2.6e6 cps

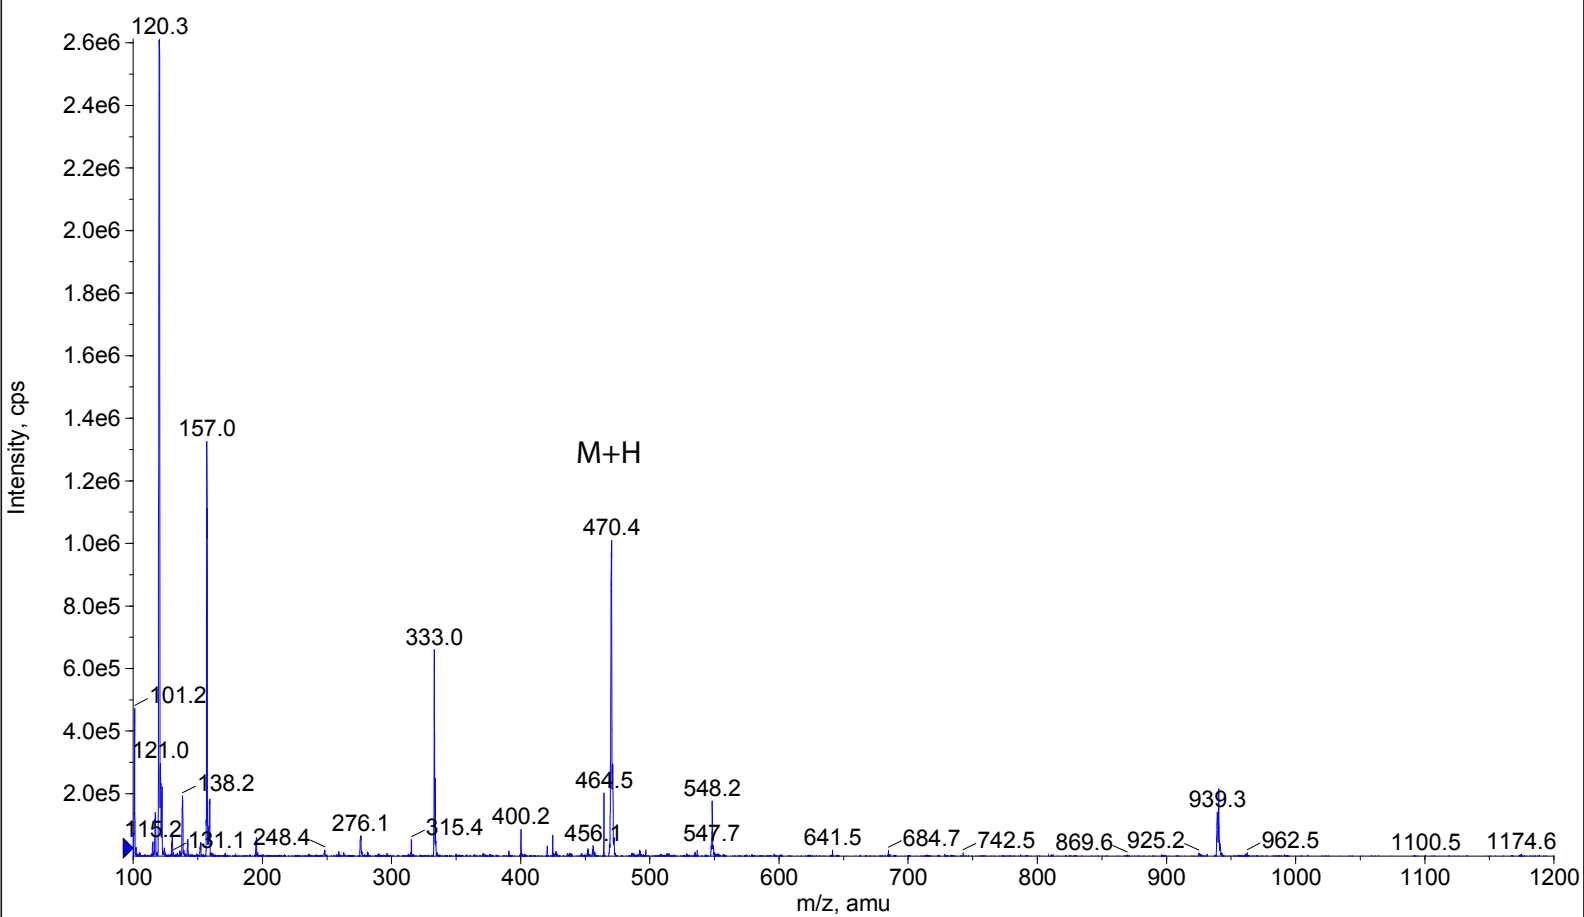

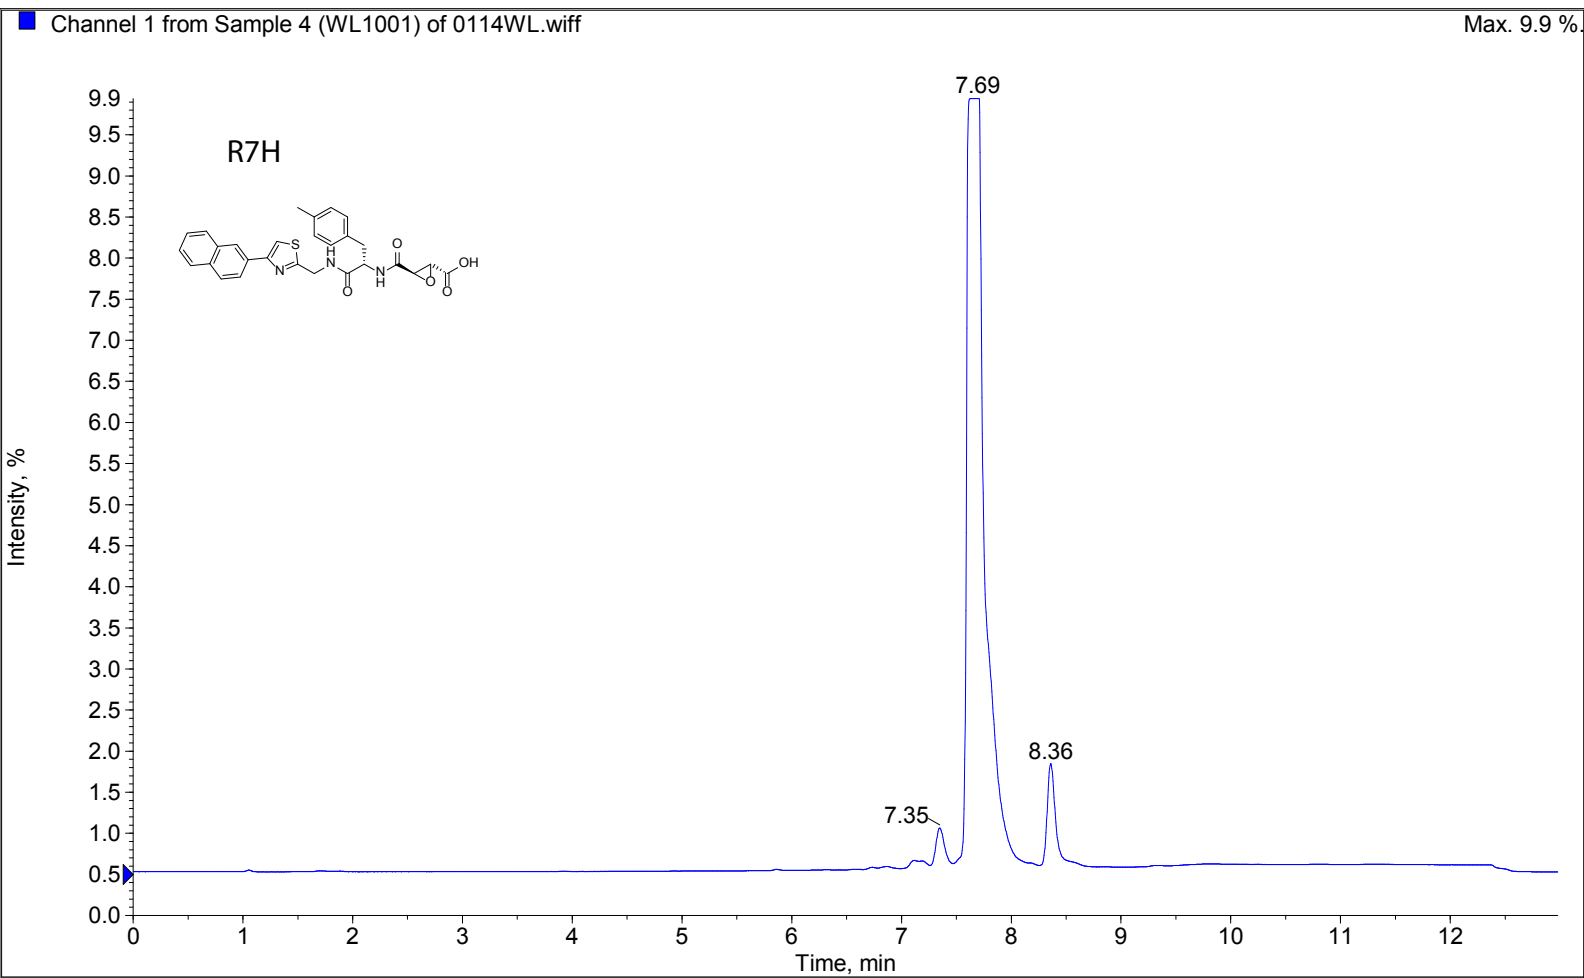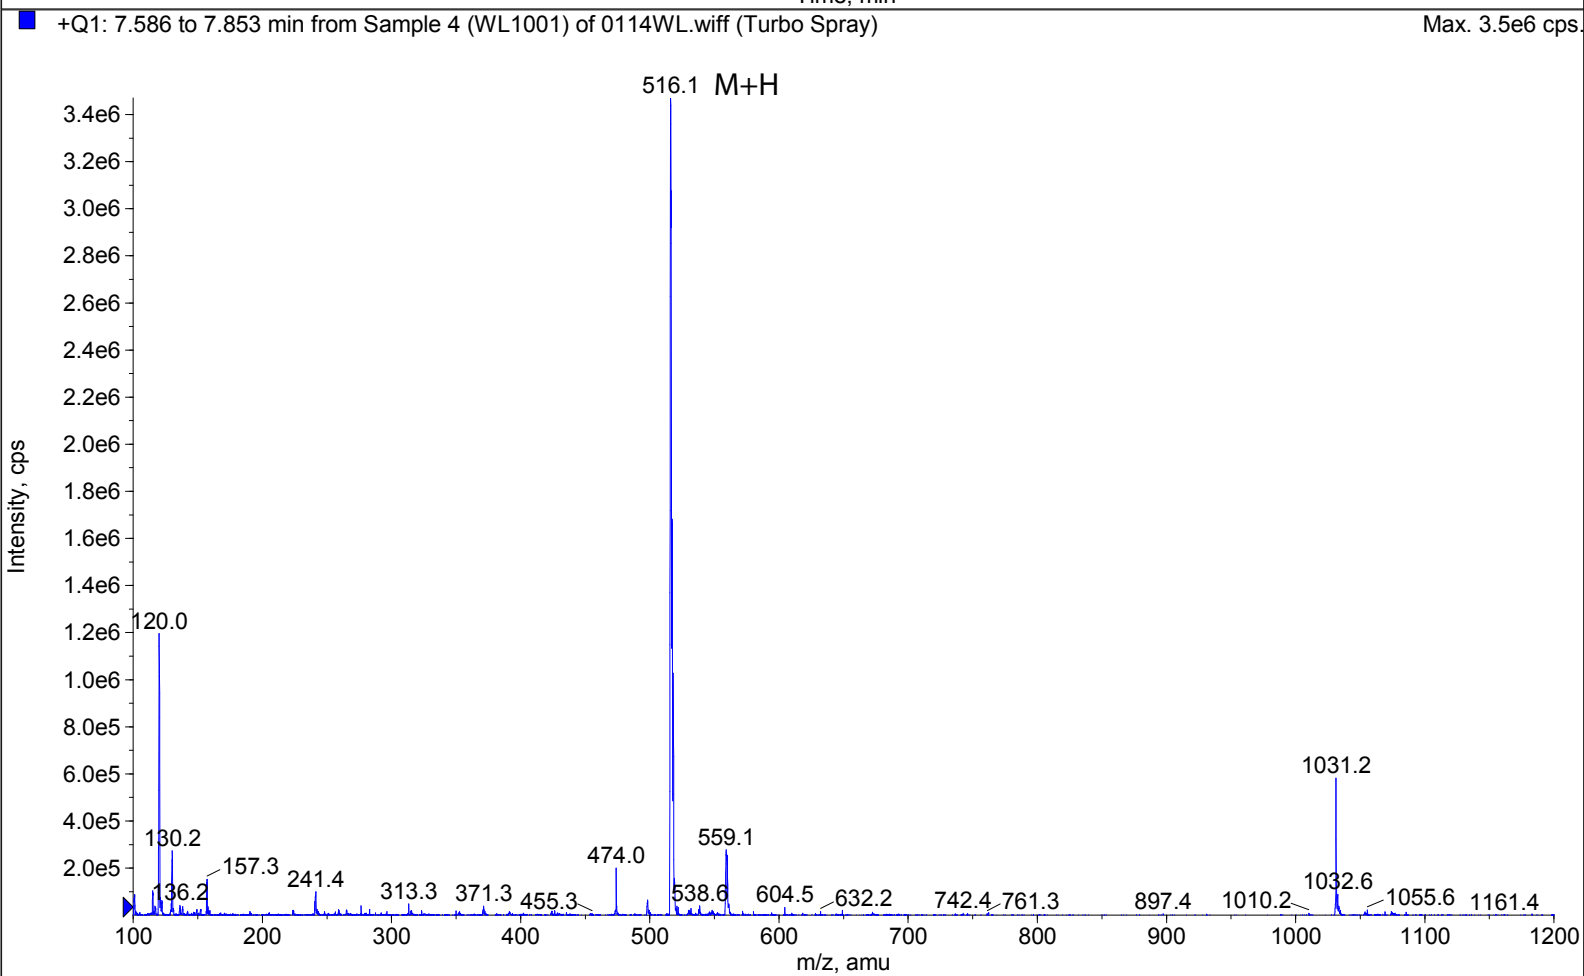

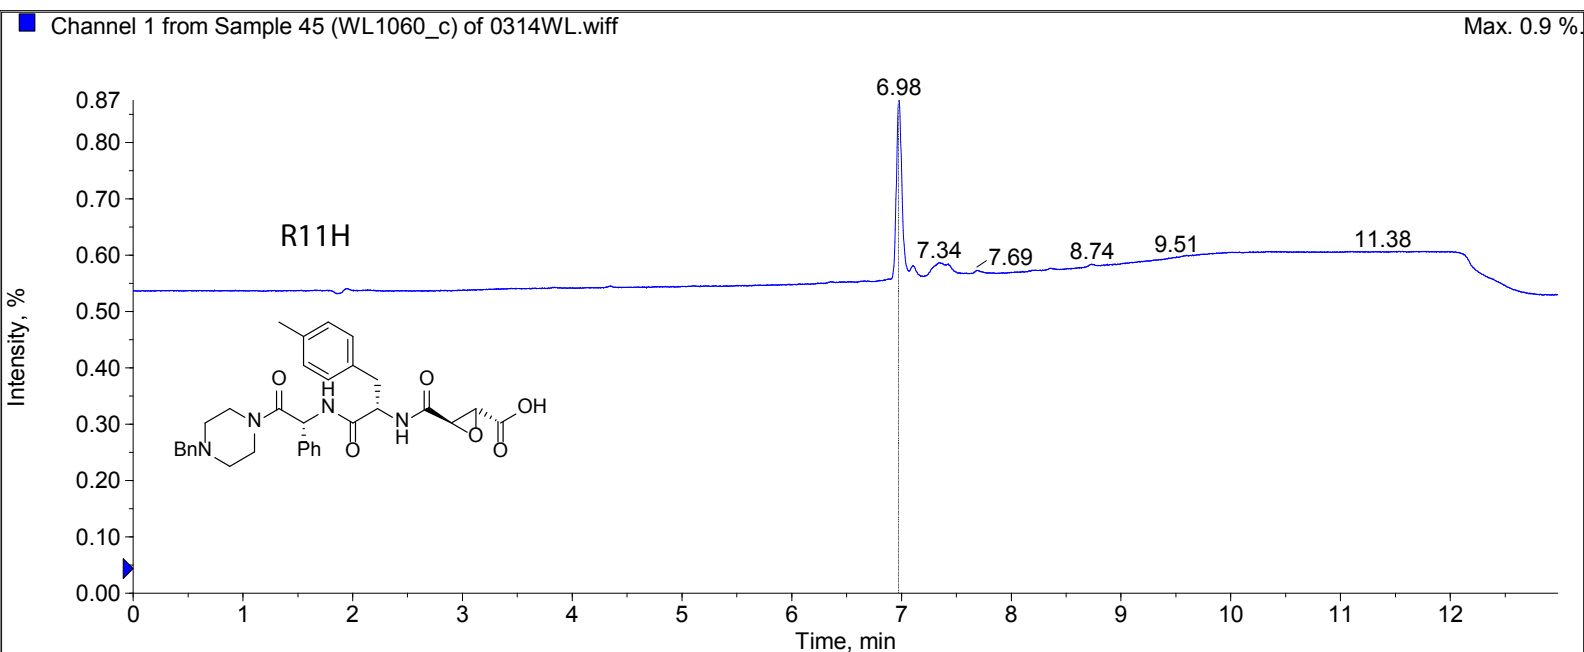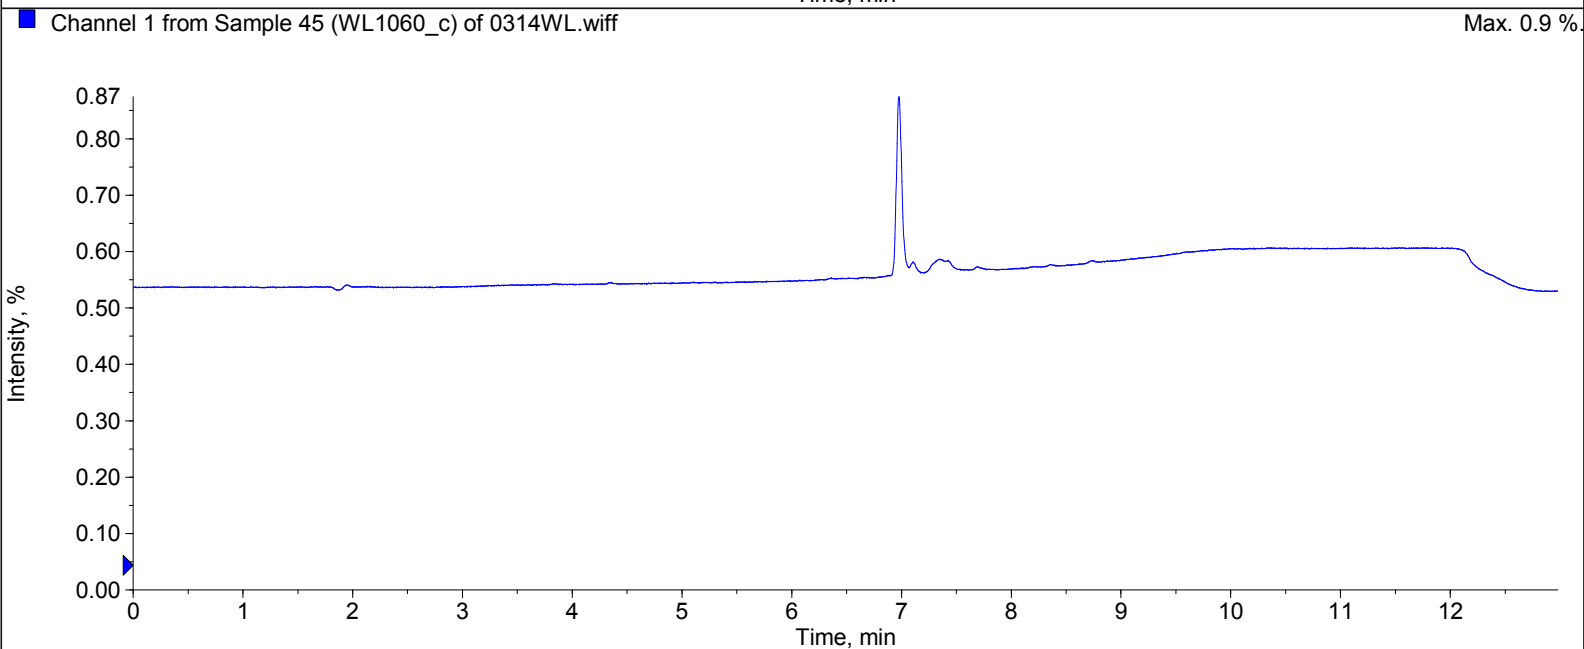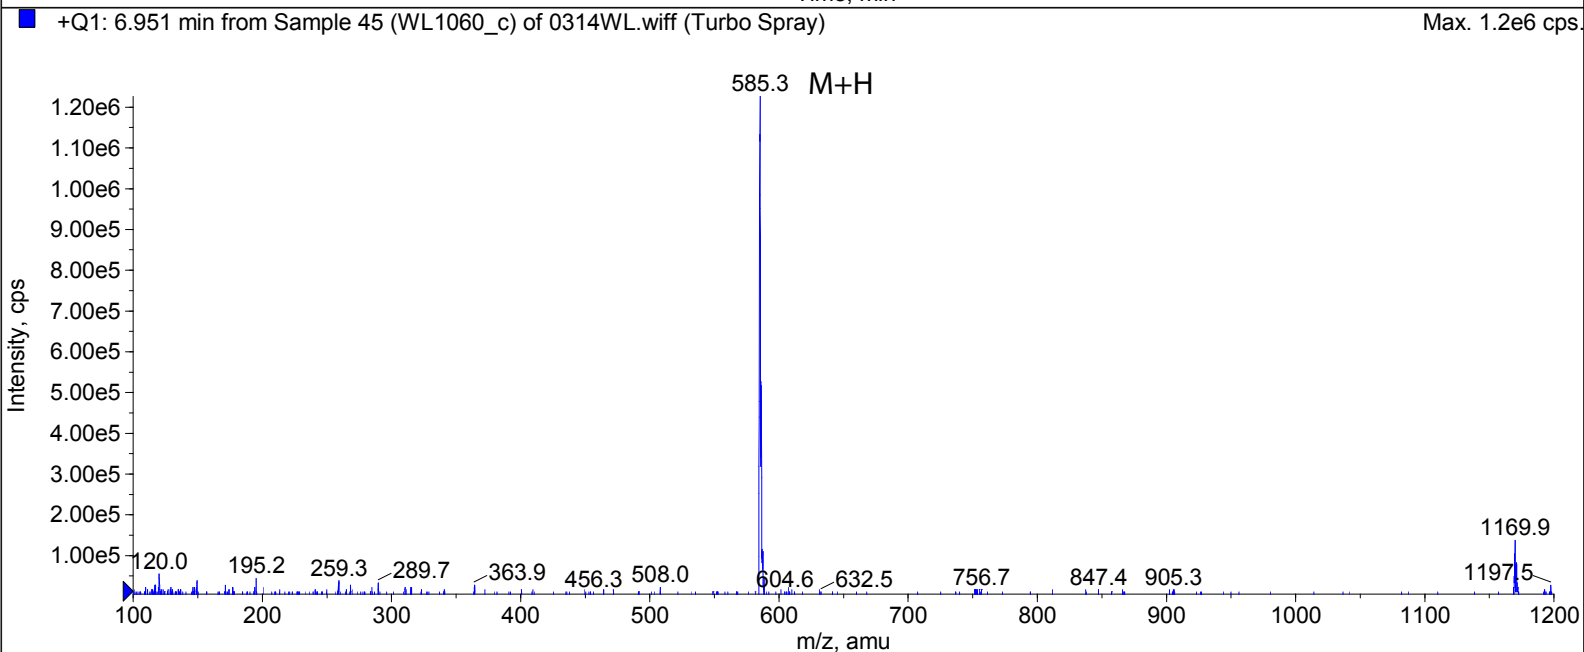

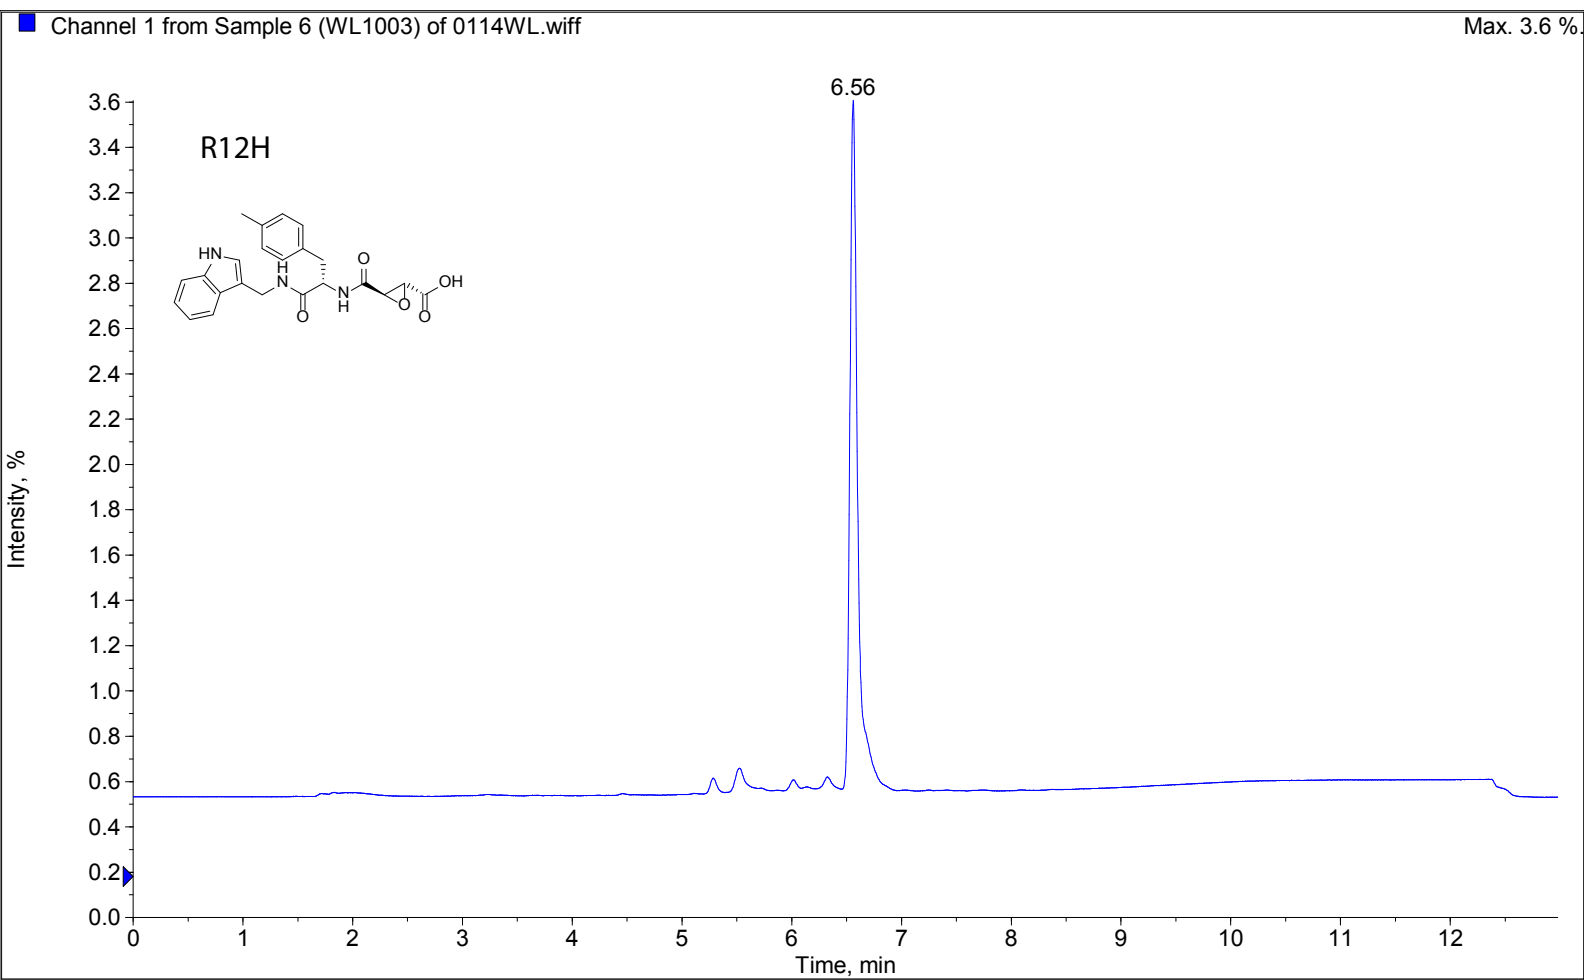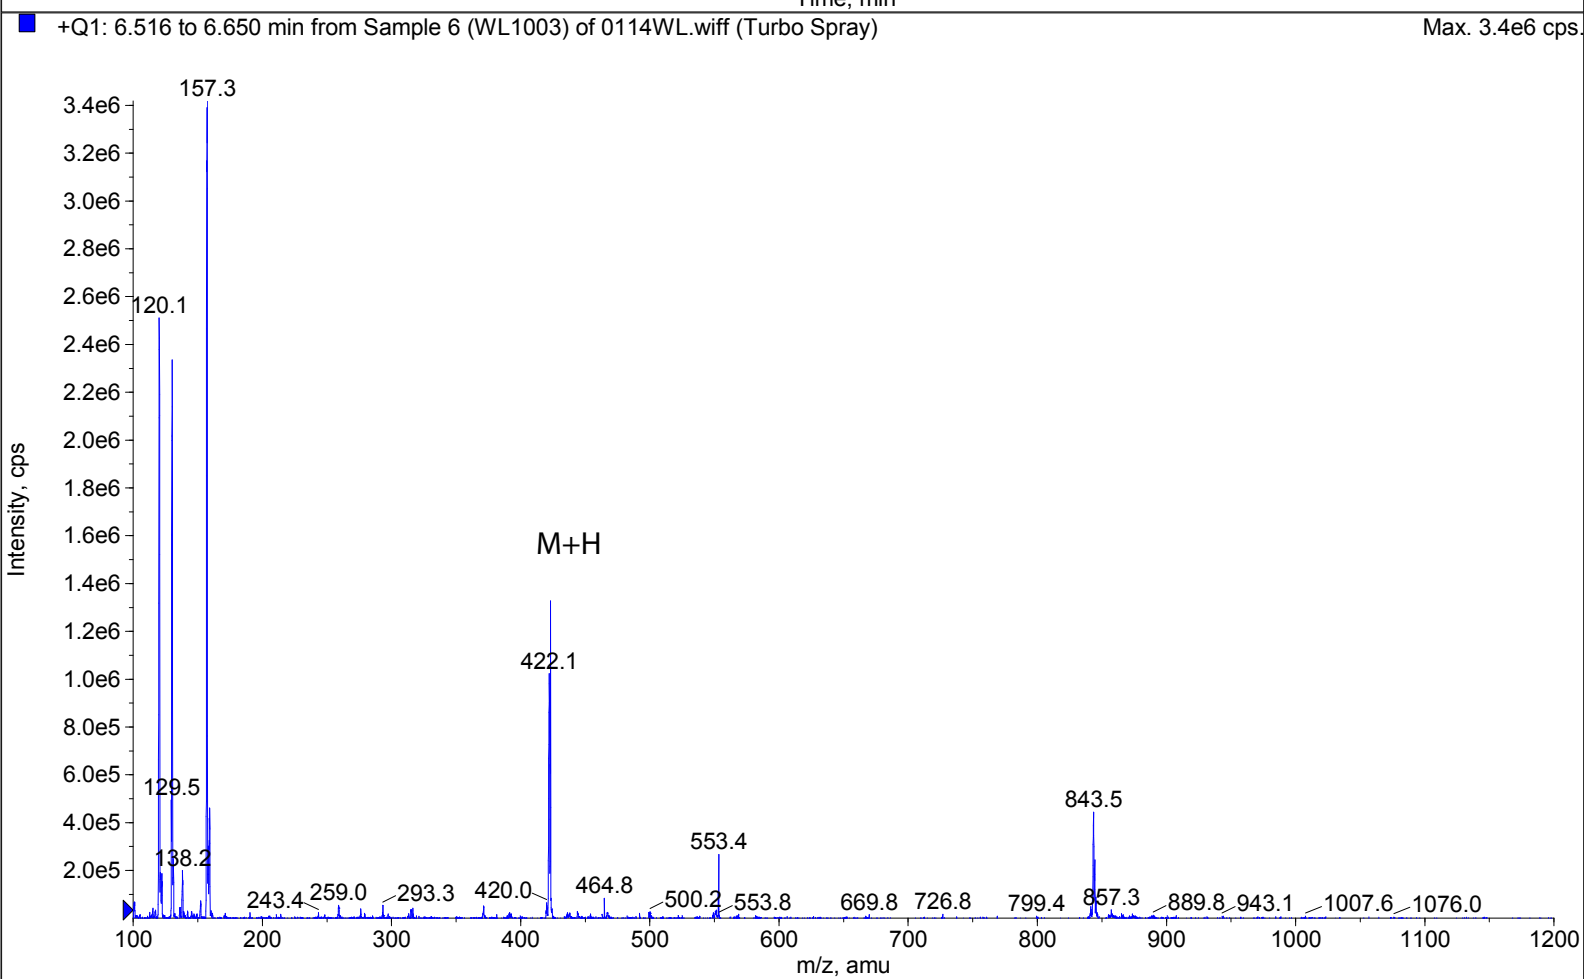

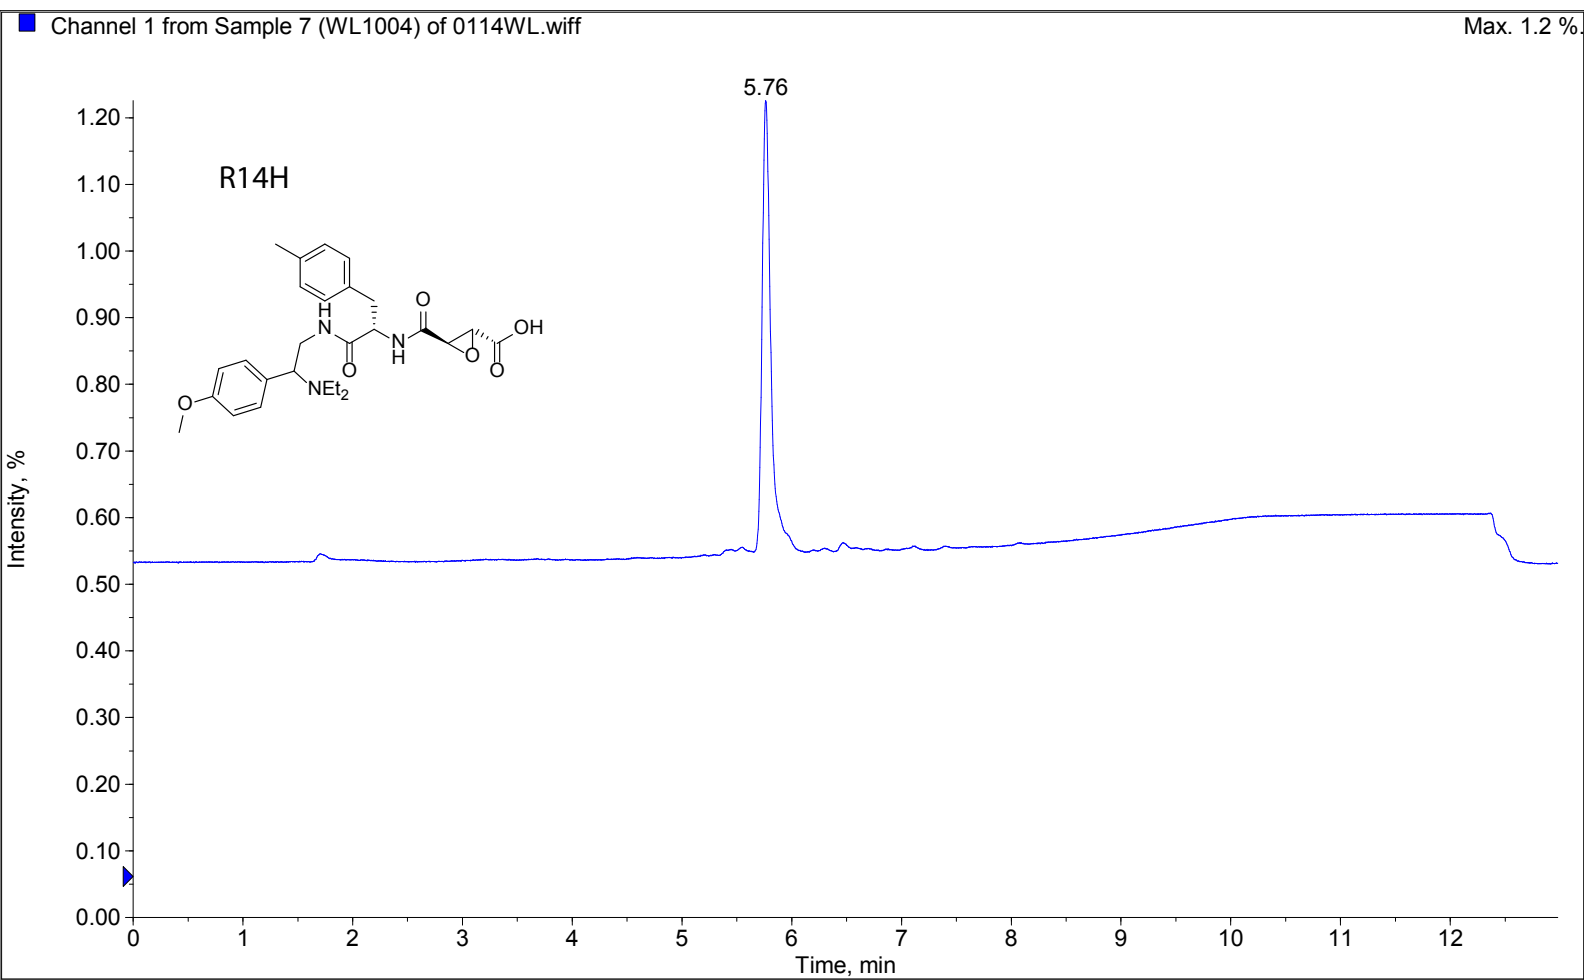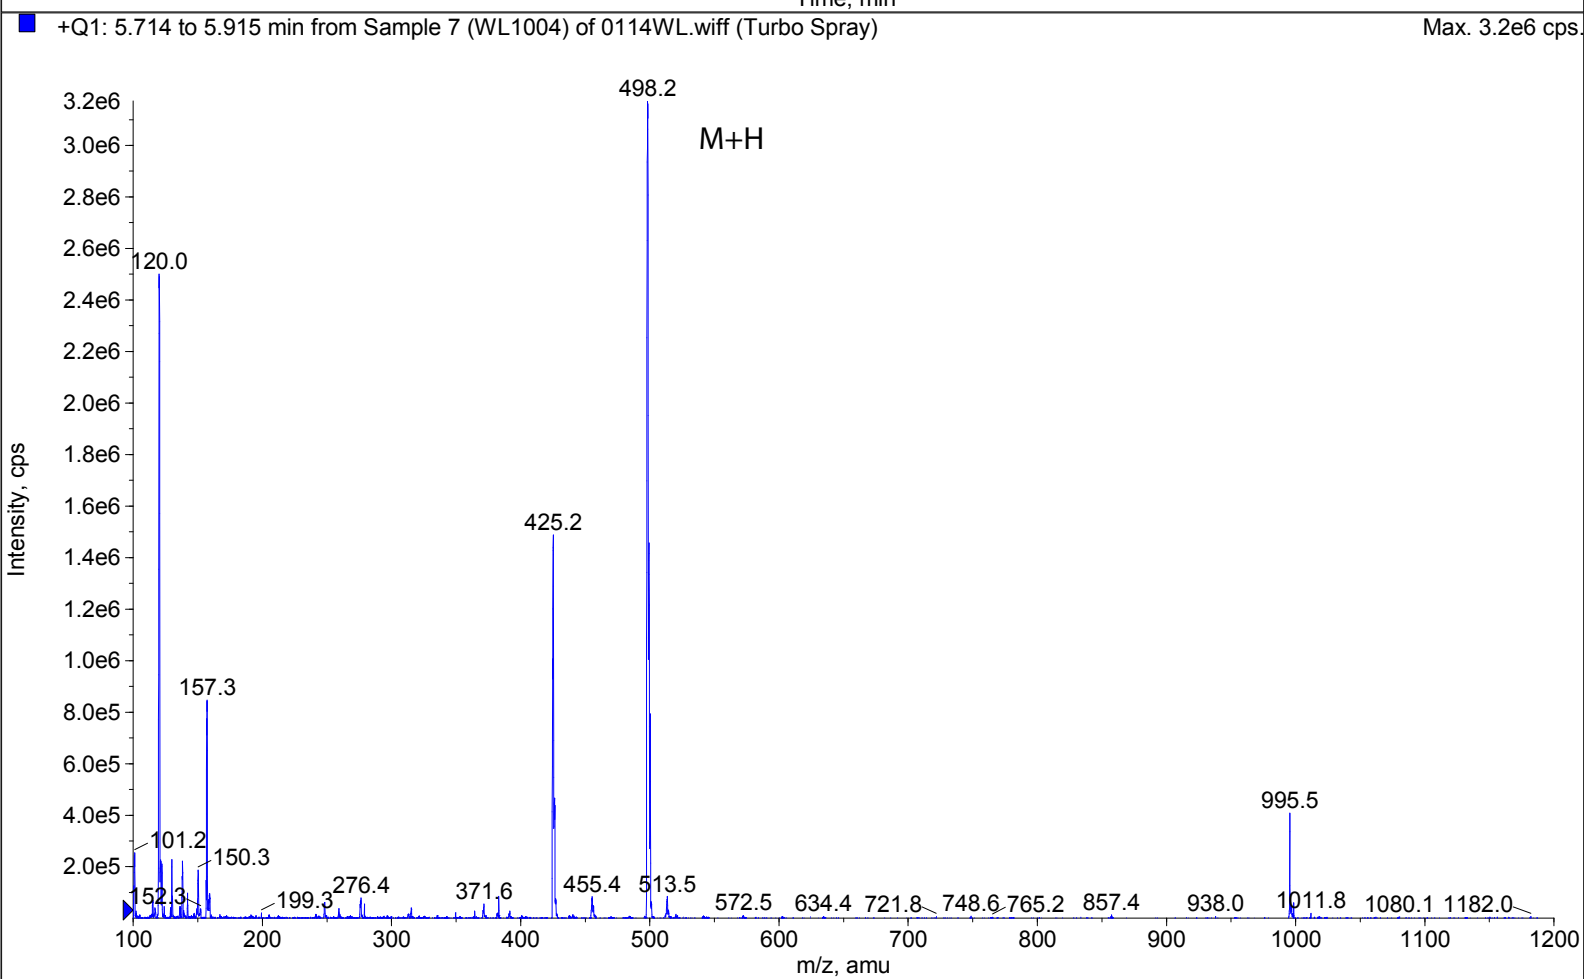

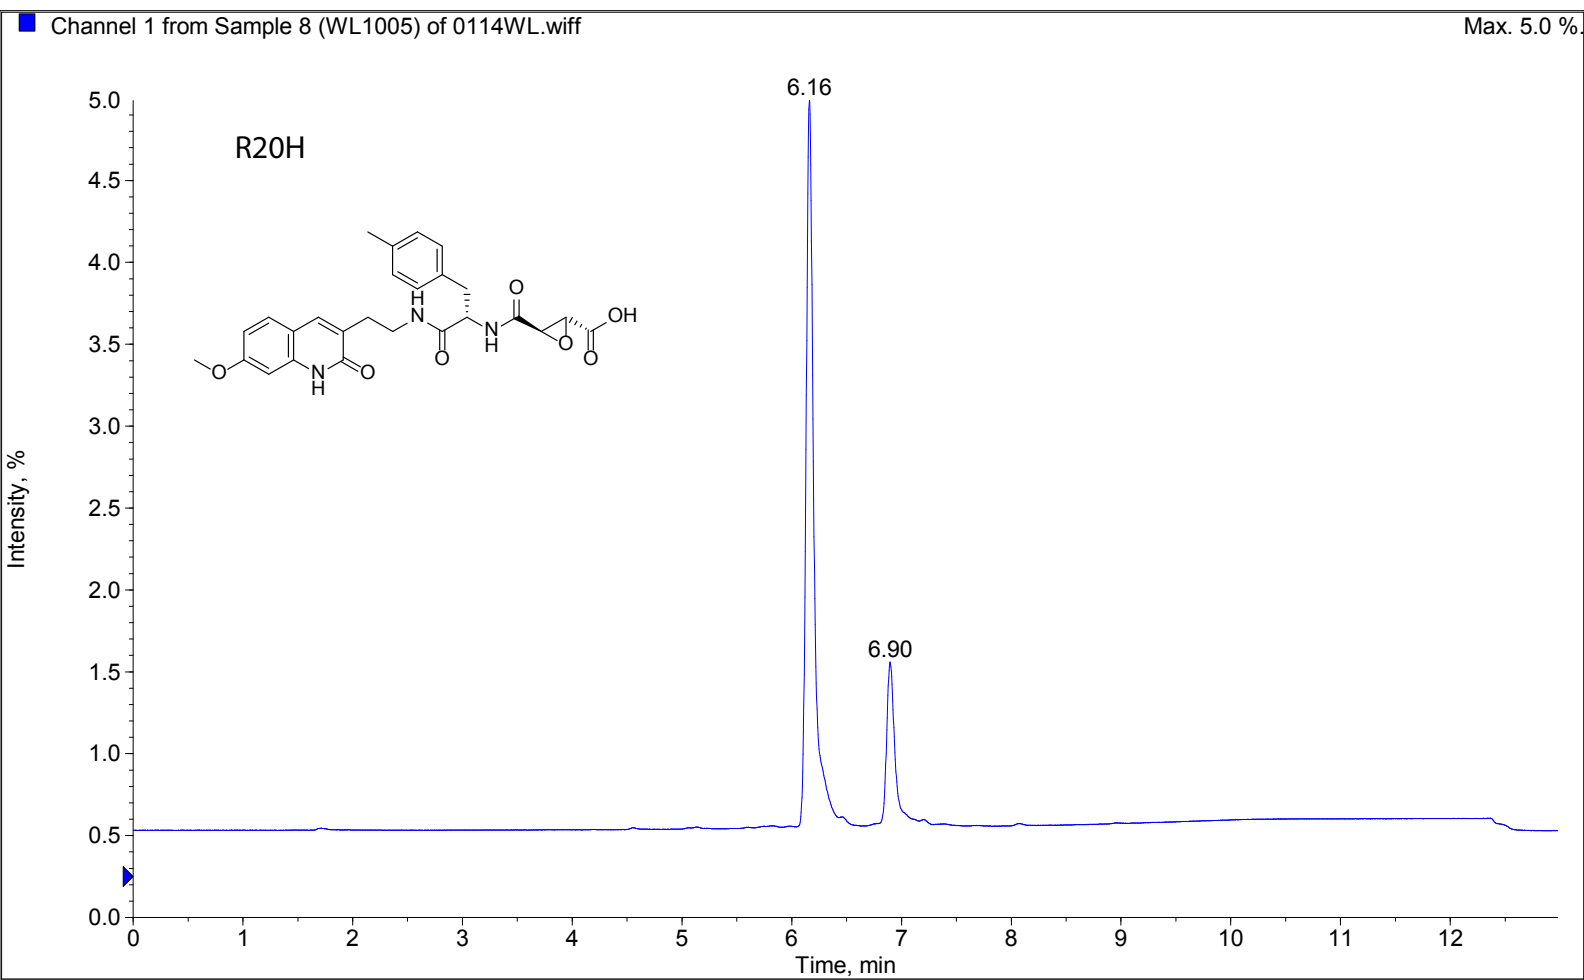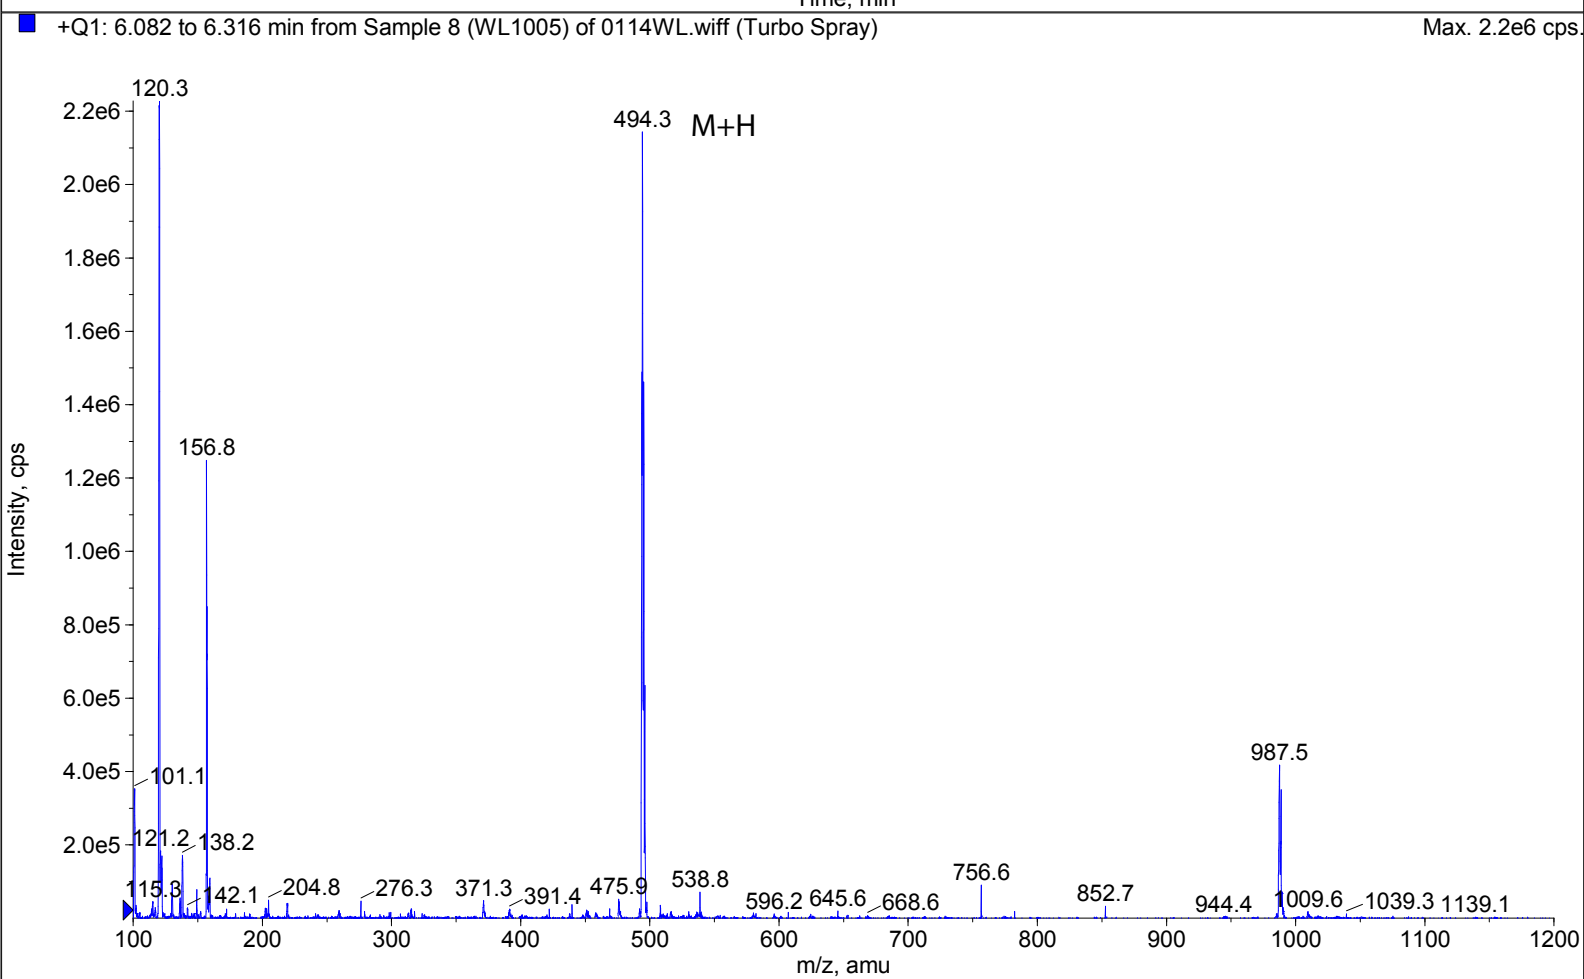

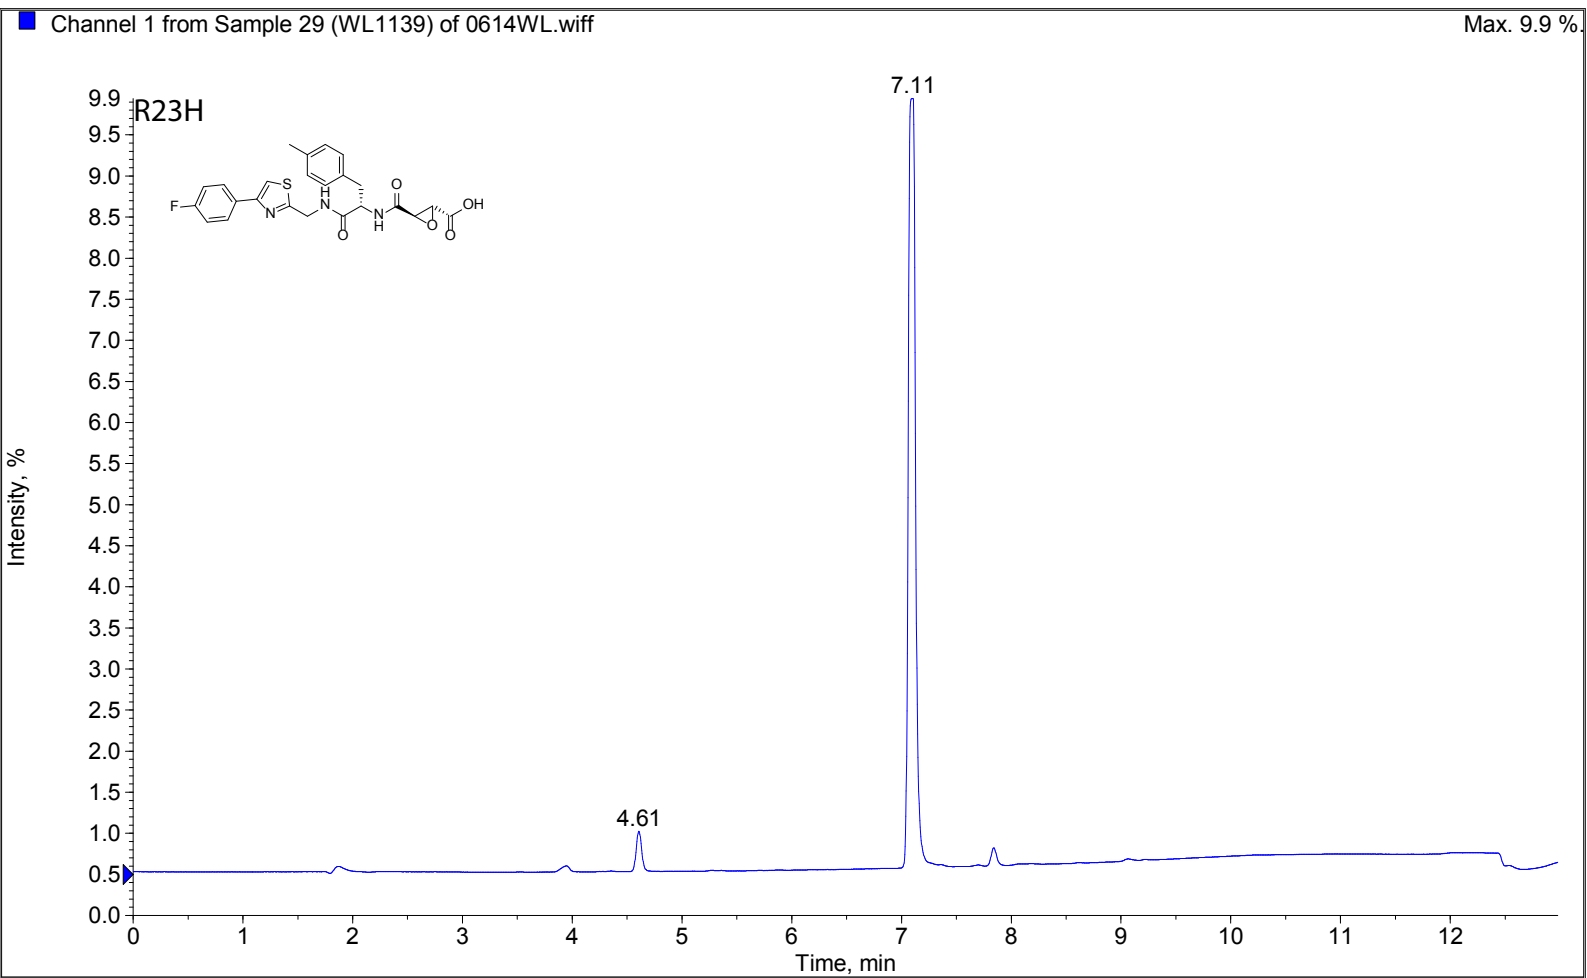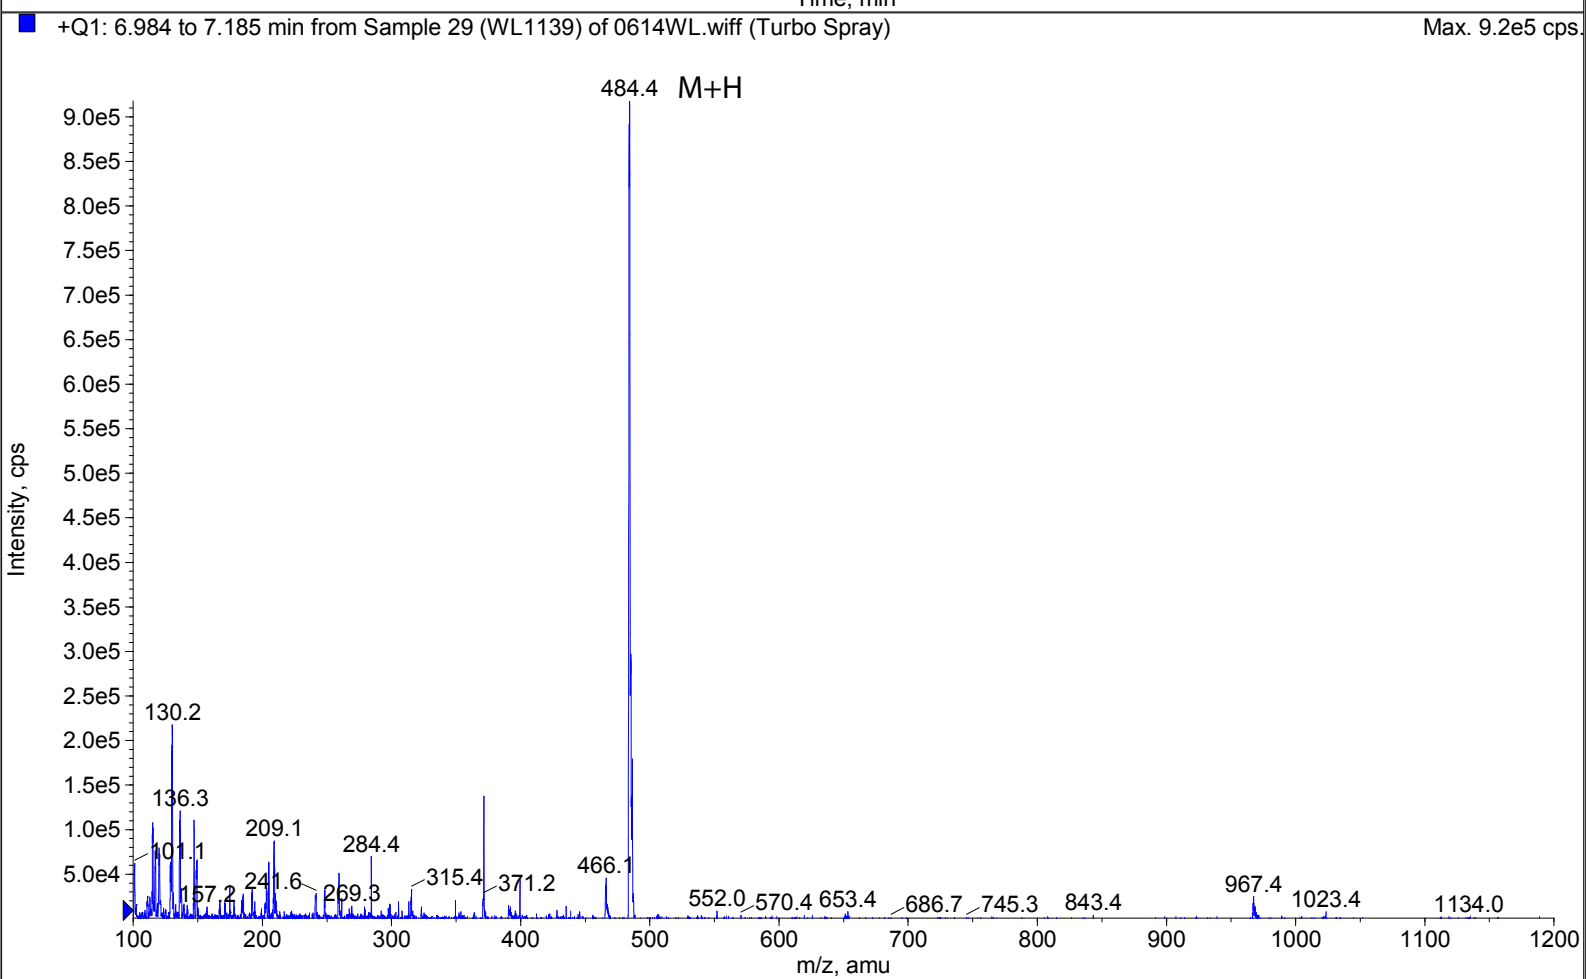

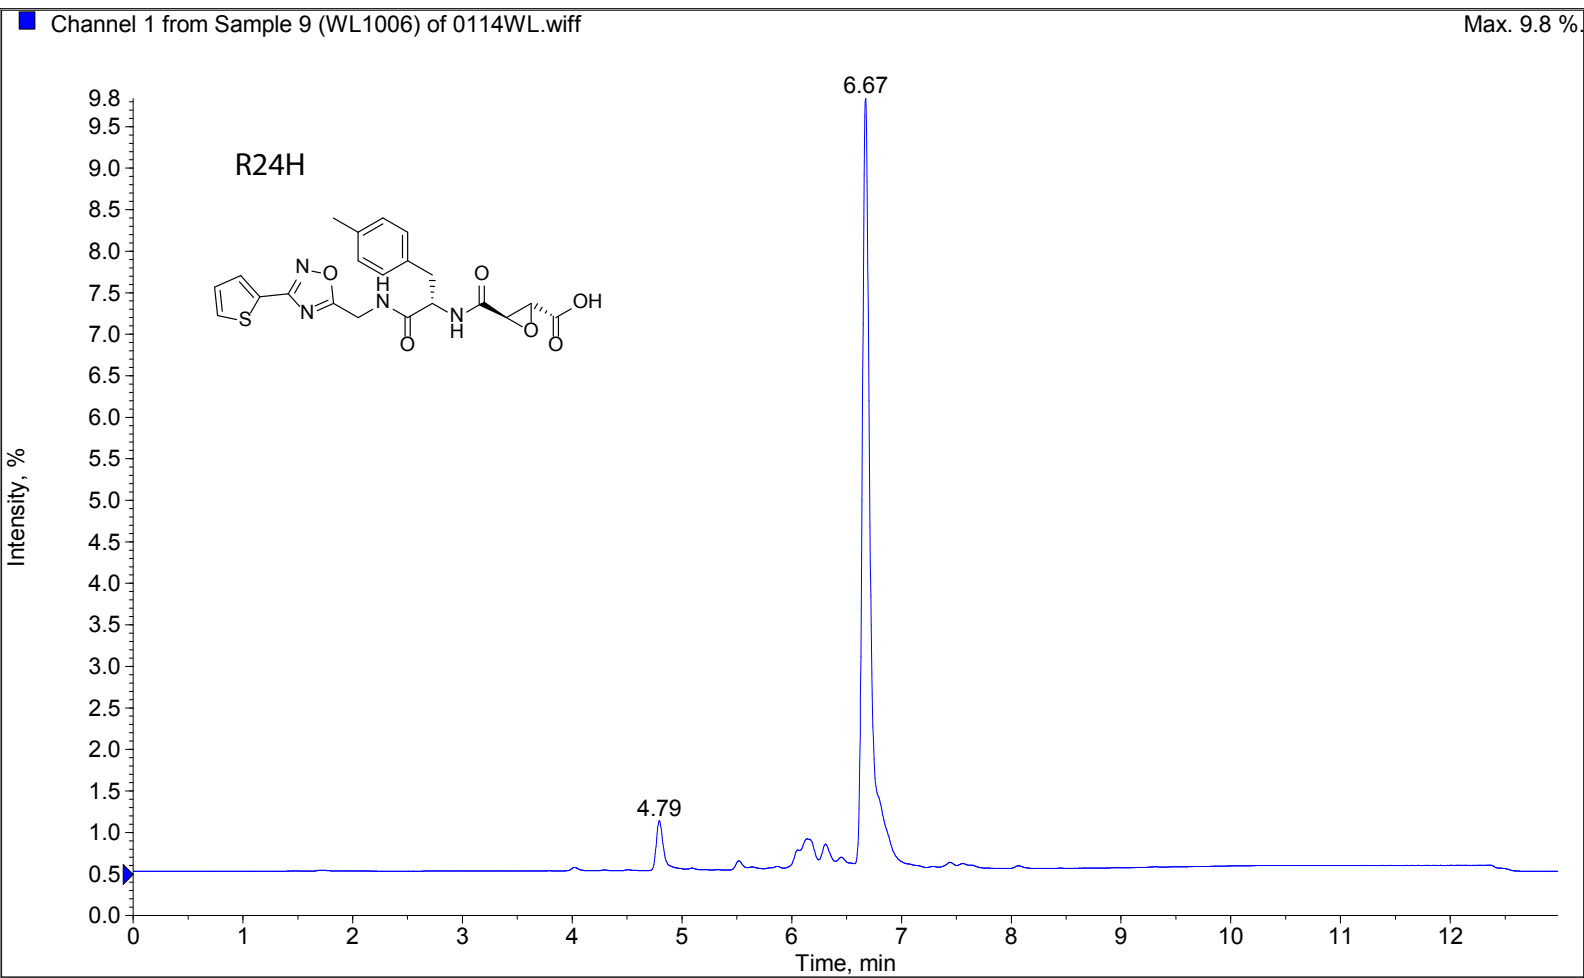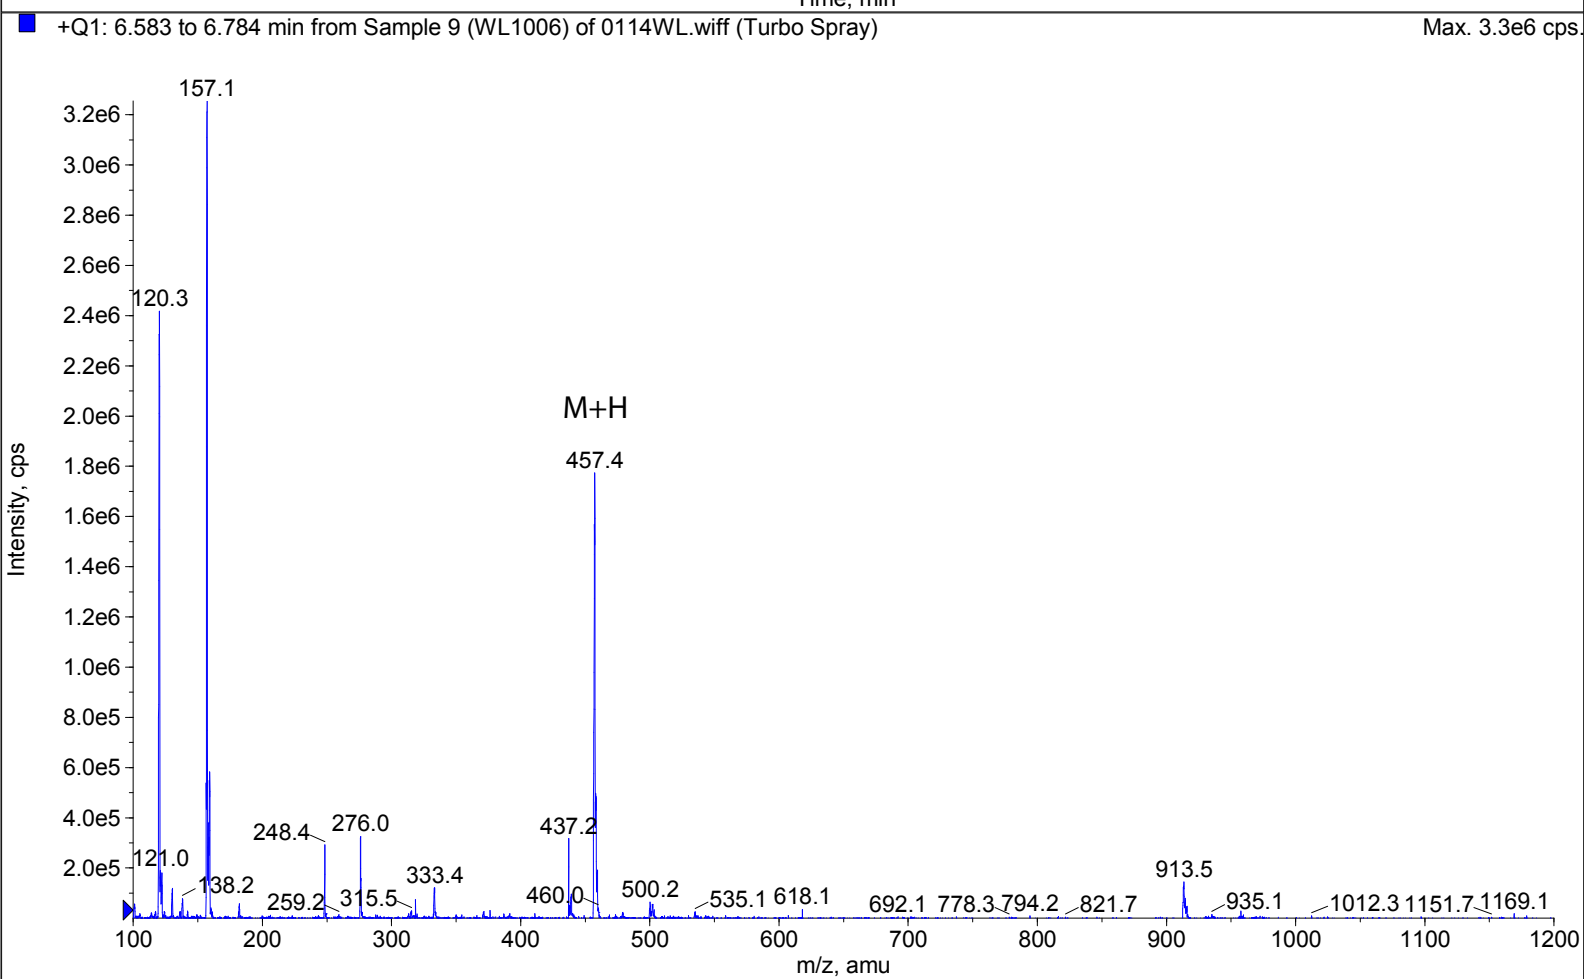



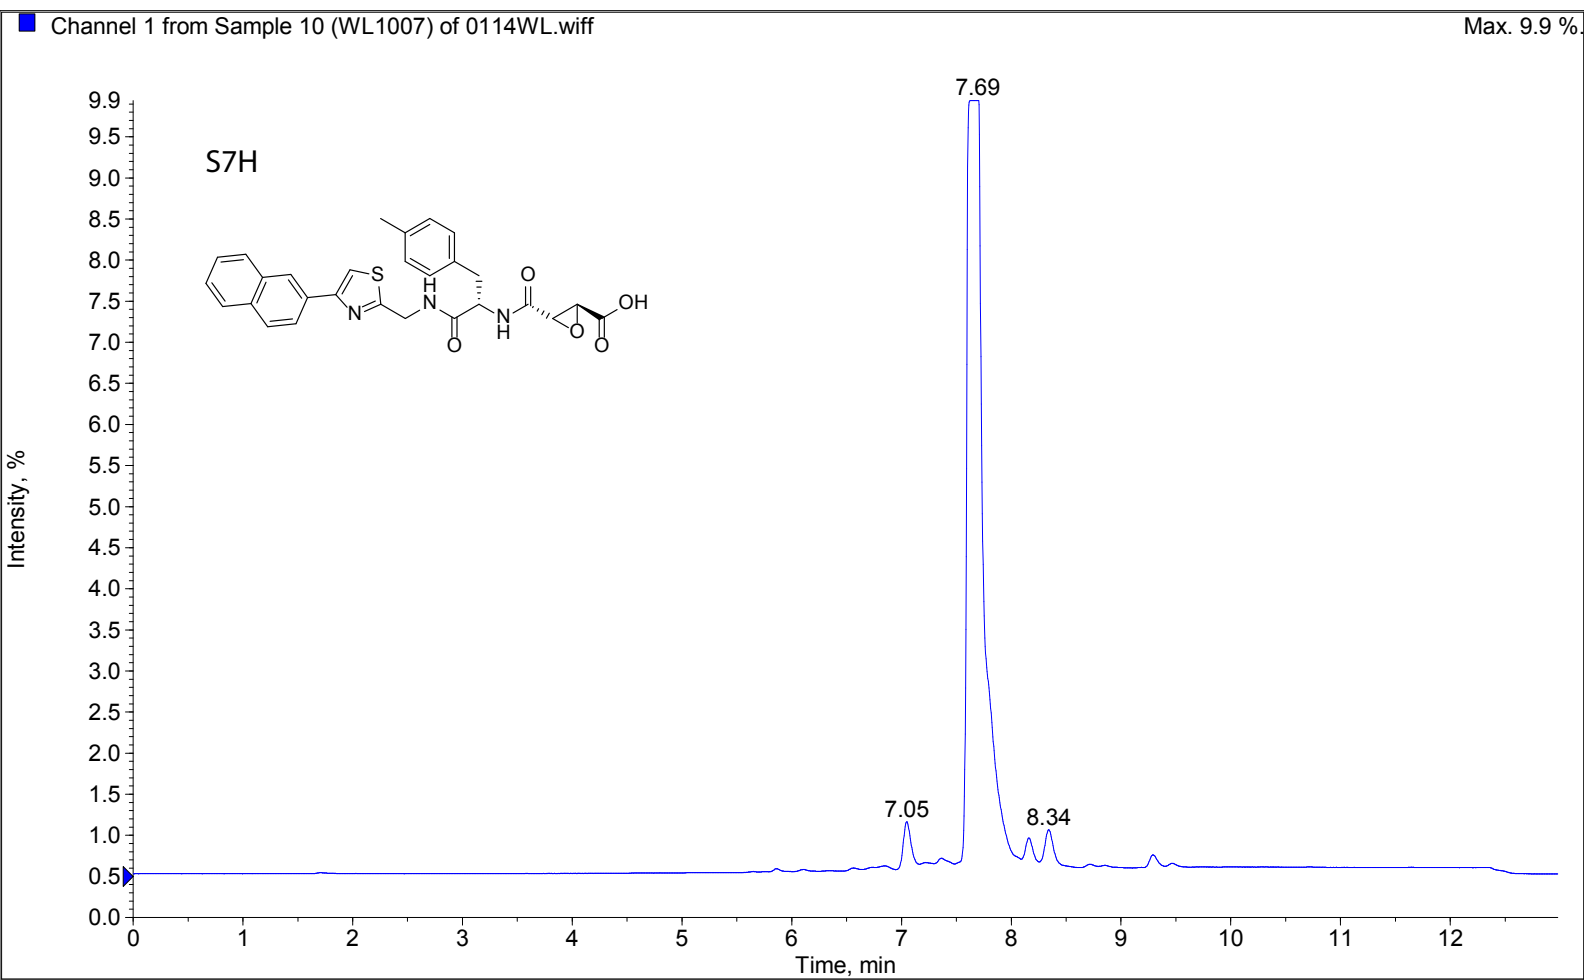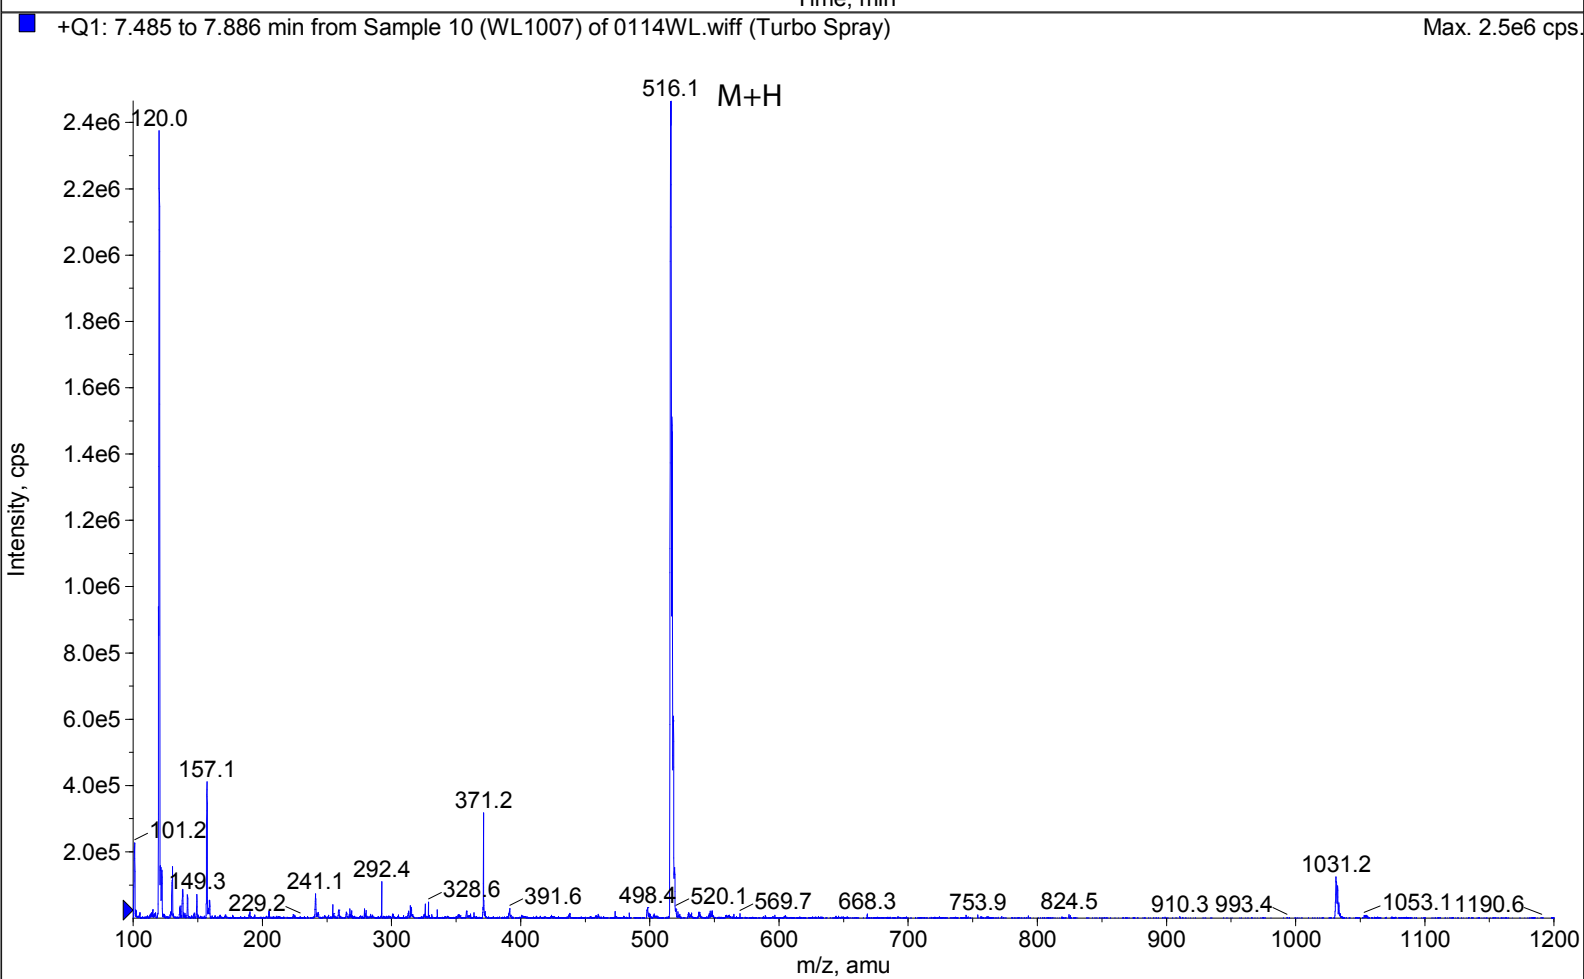

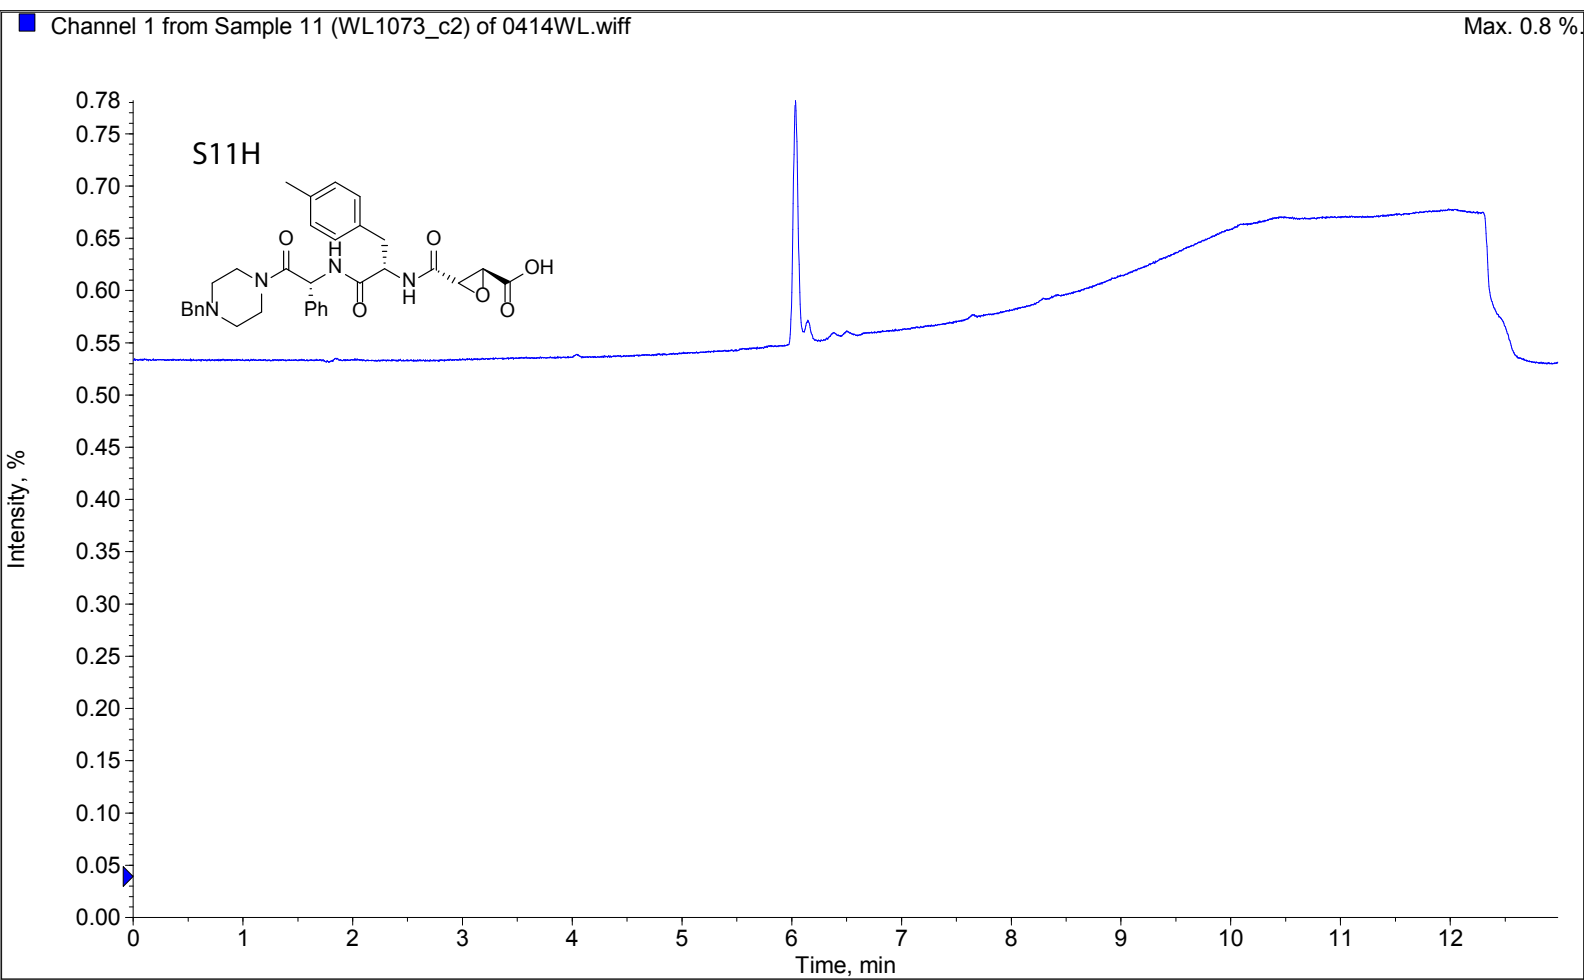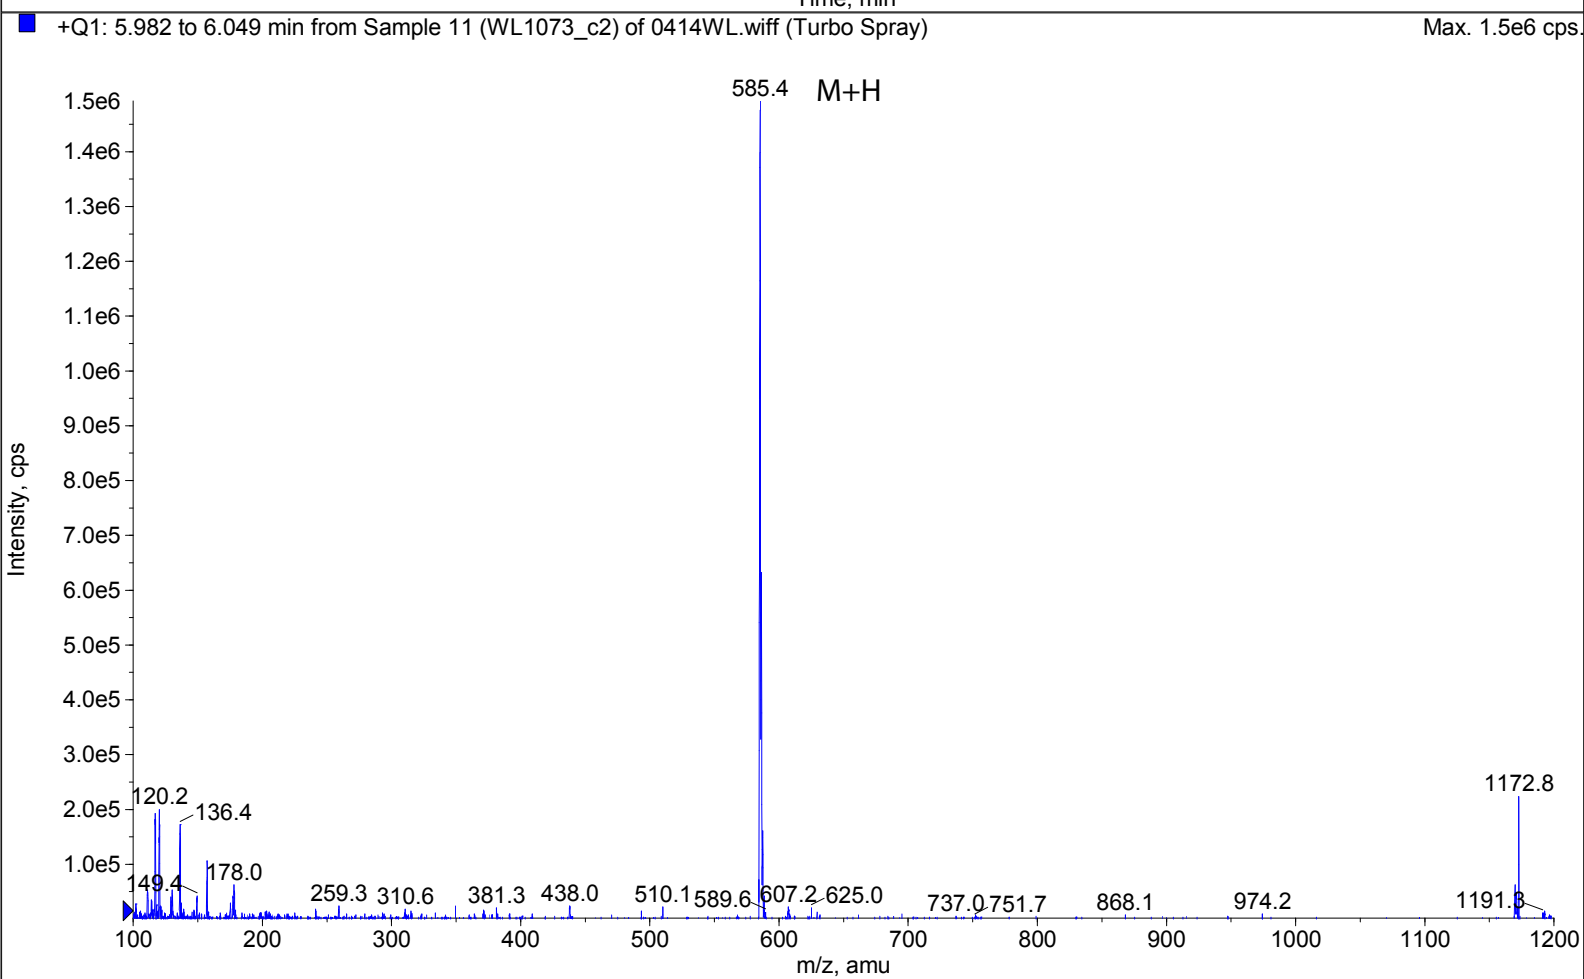

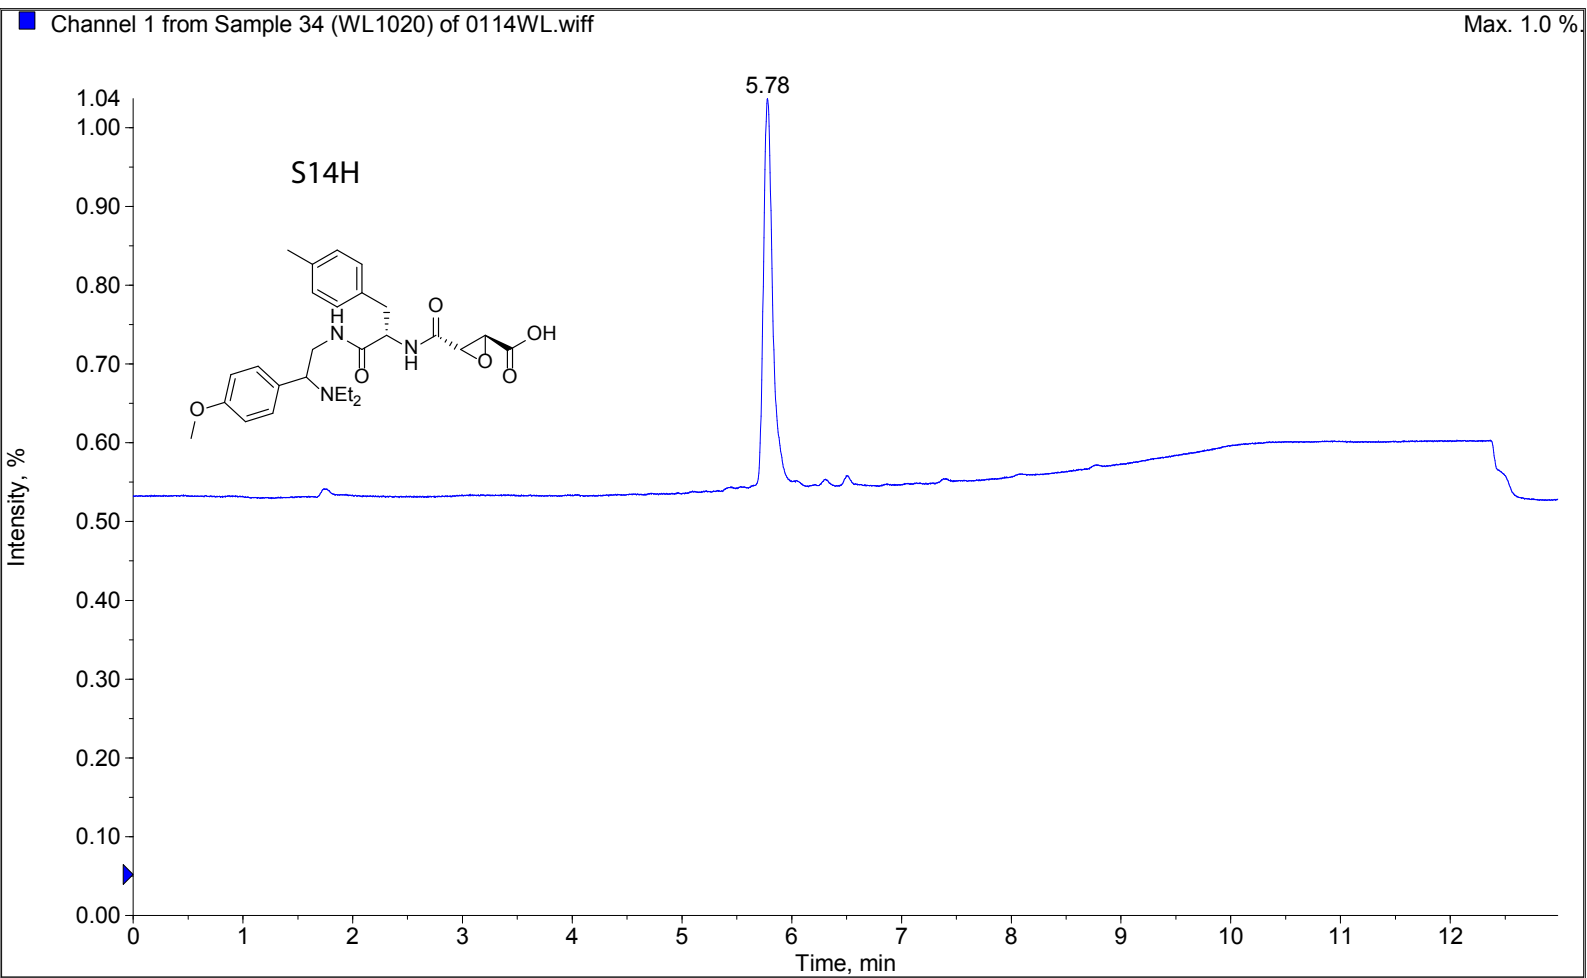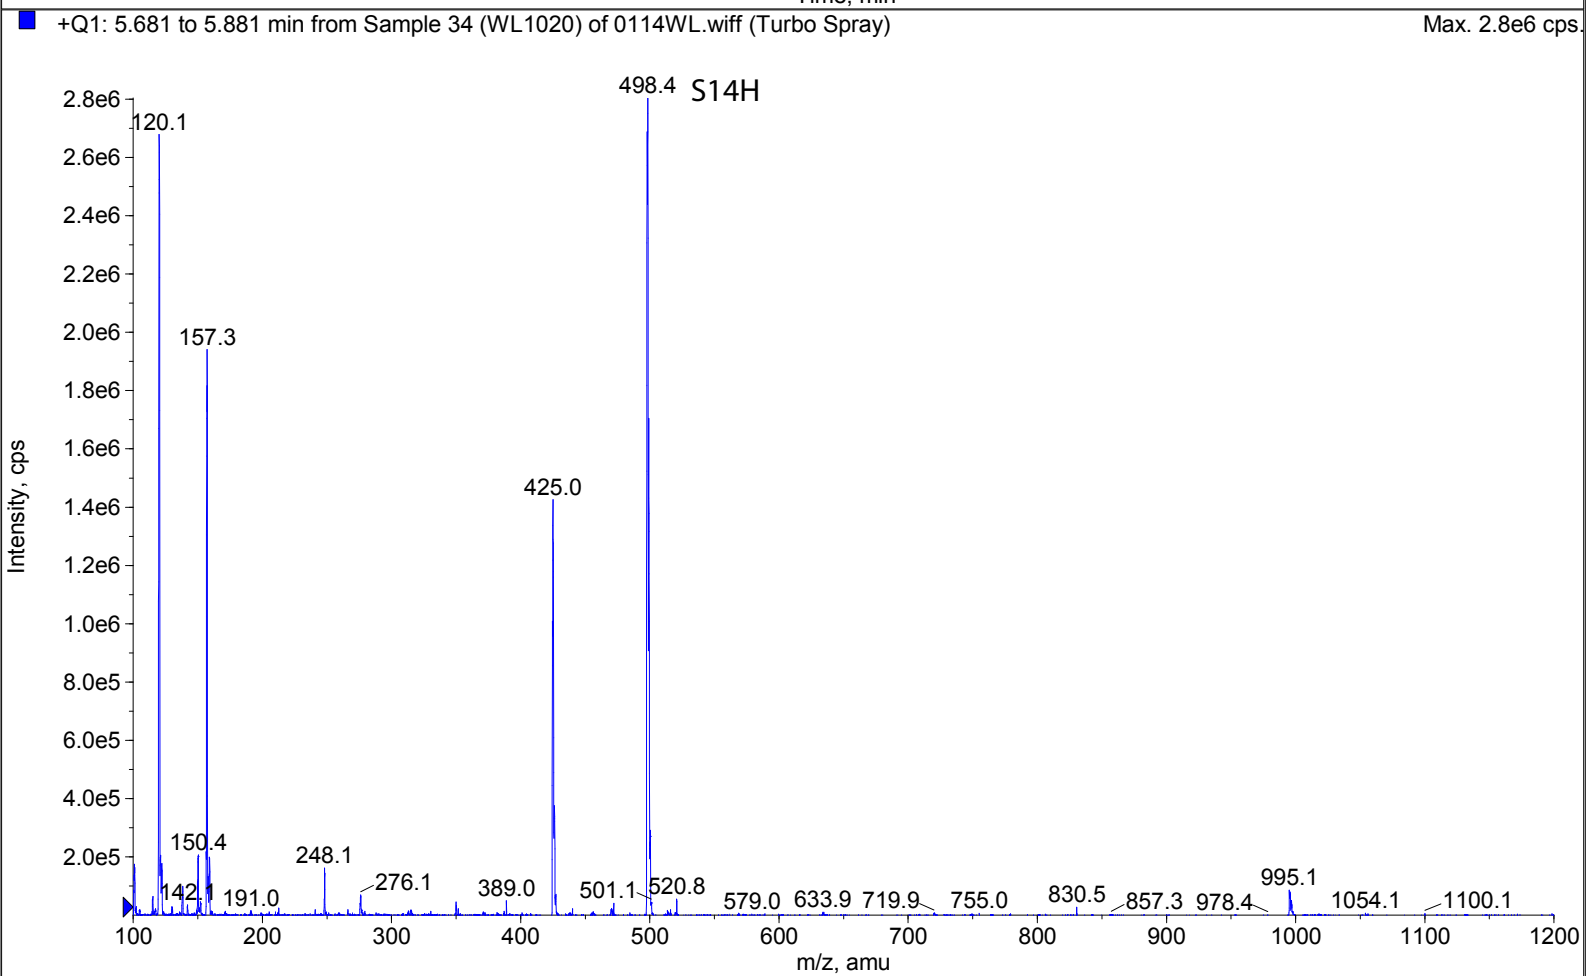

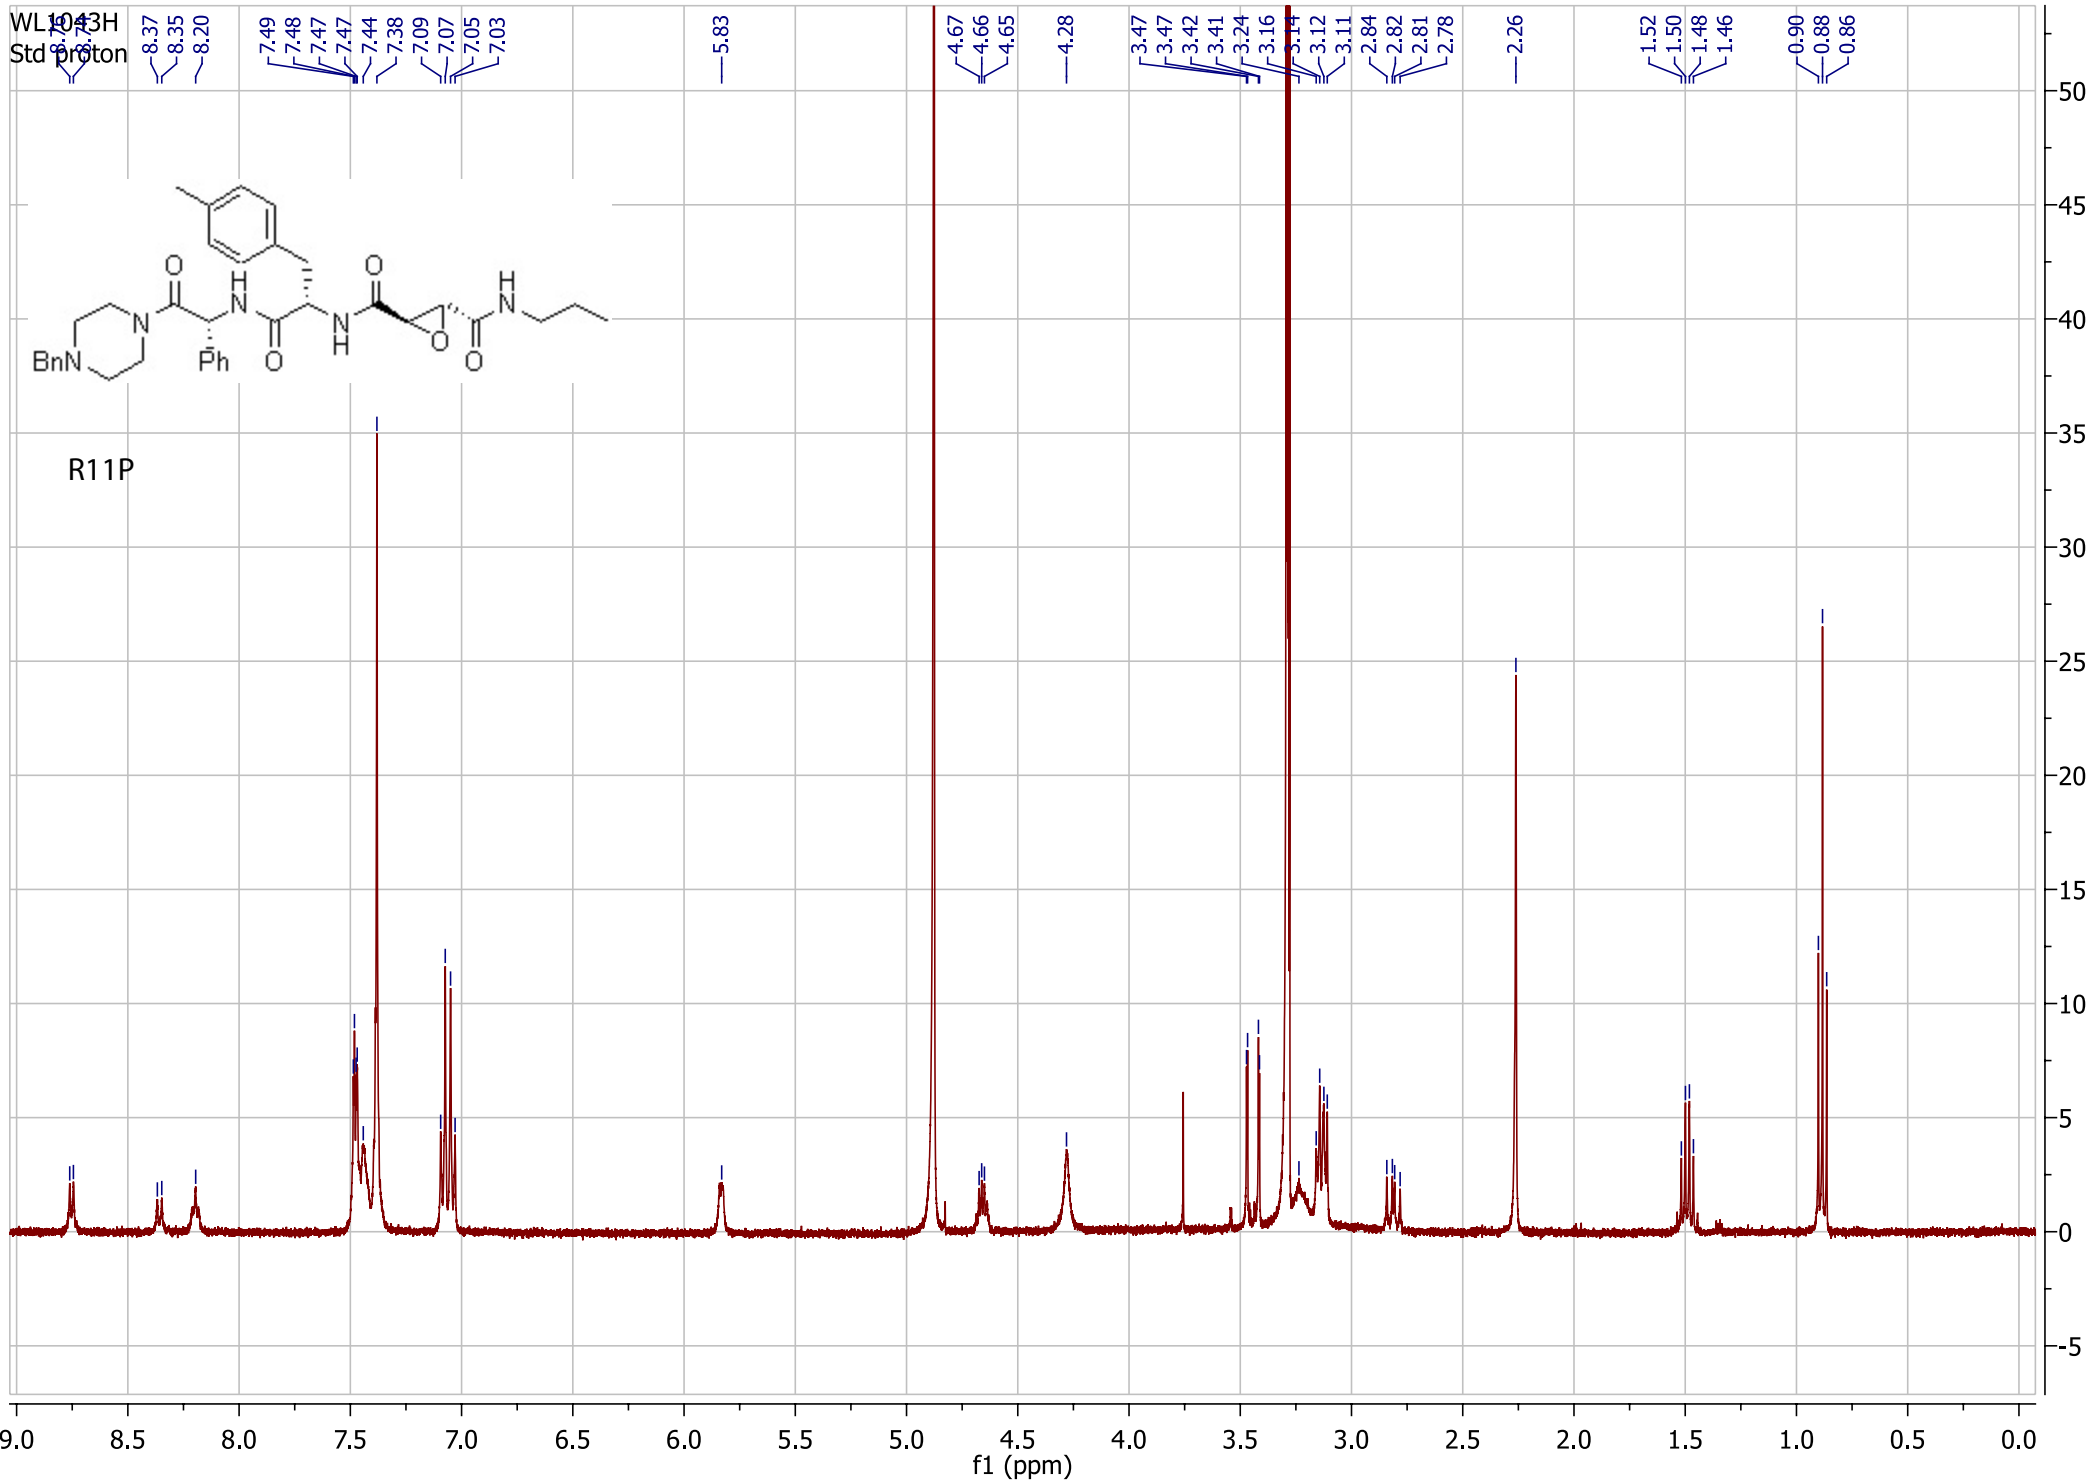

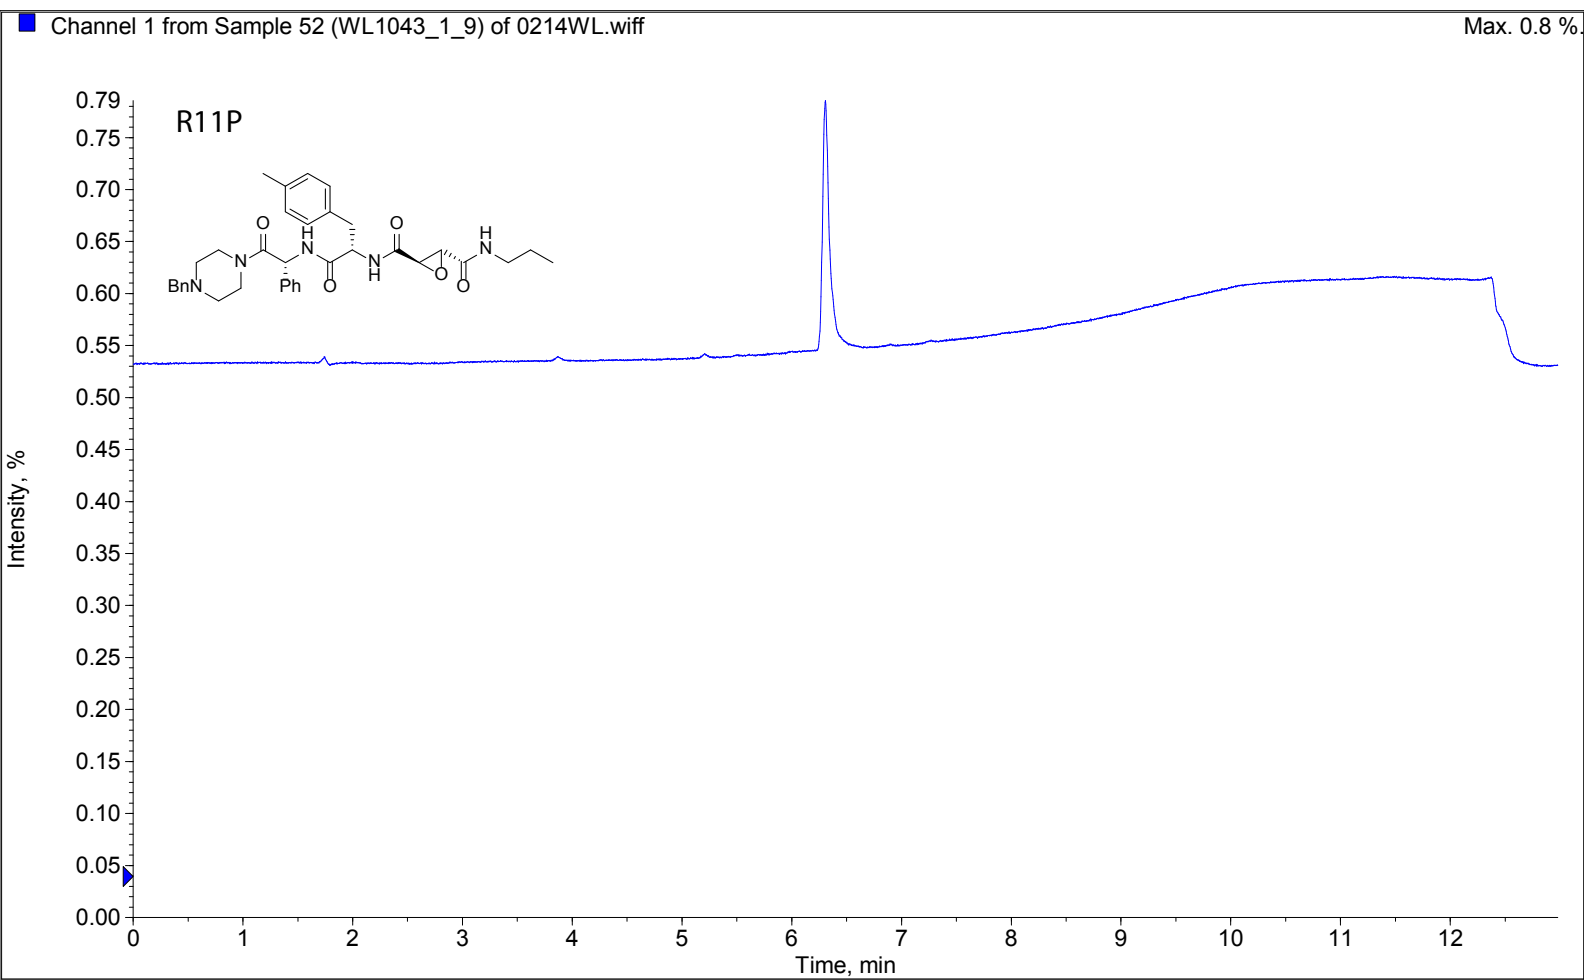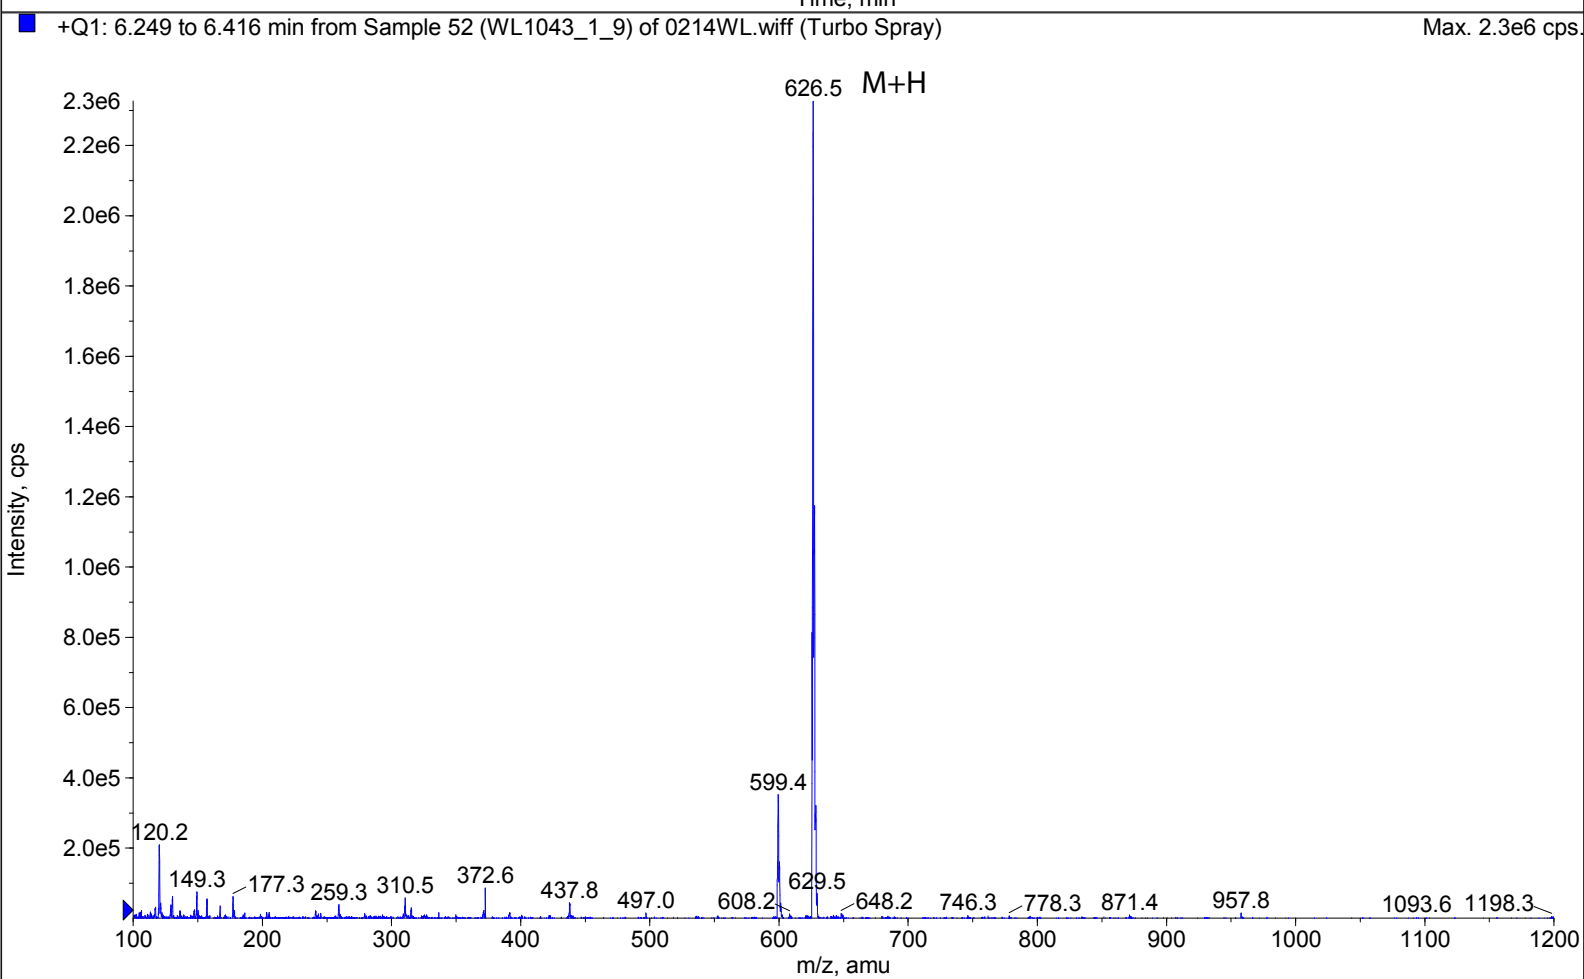

WI 11224-1

SI

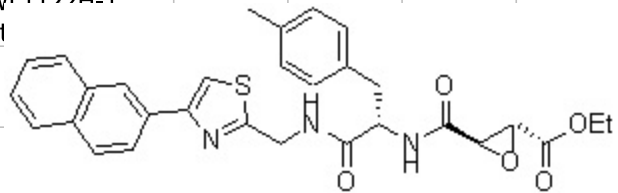

R7P

DMF

DMF

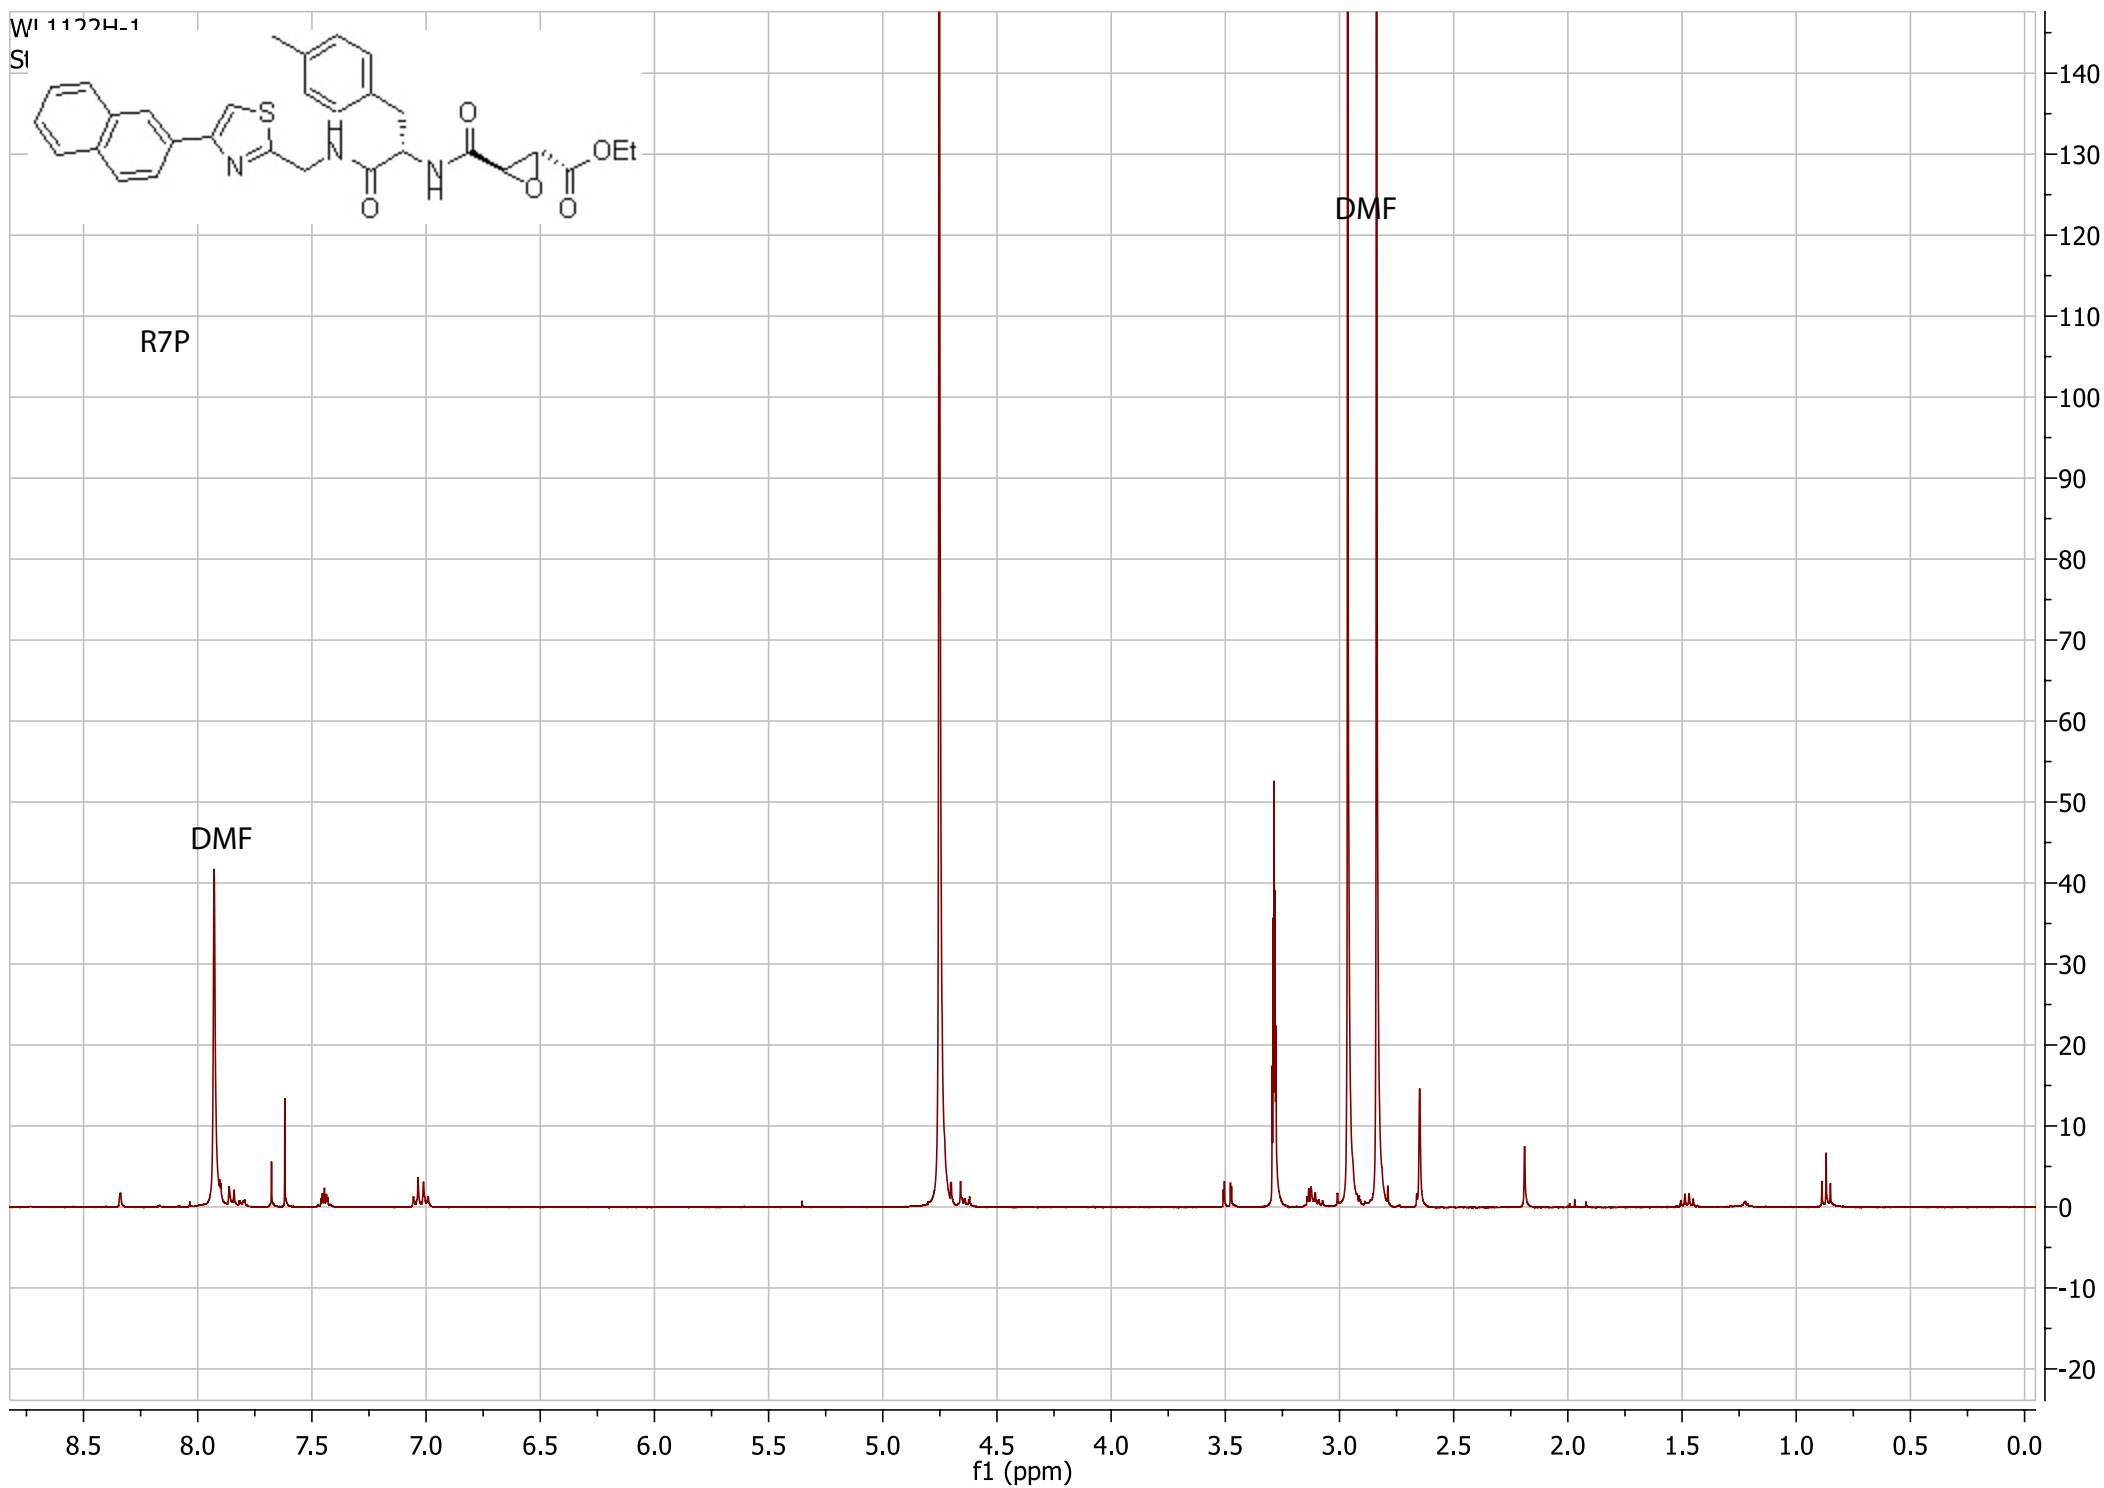

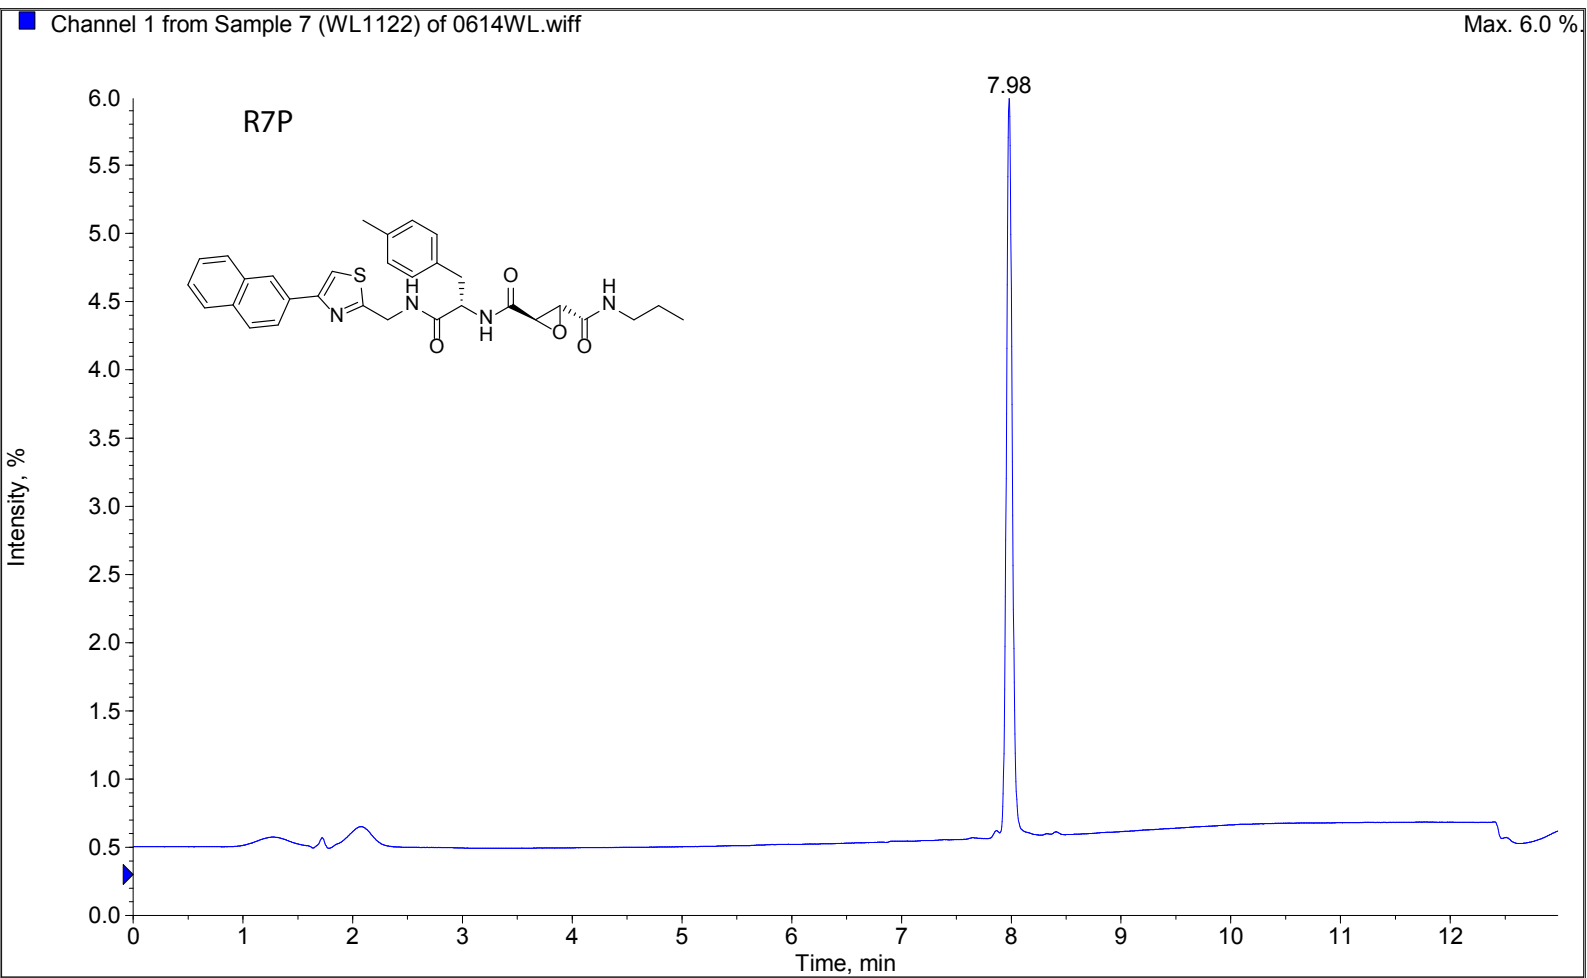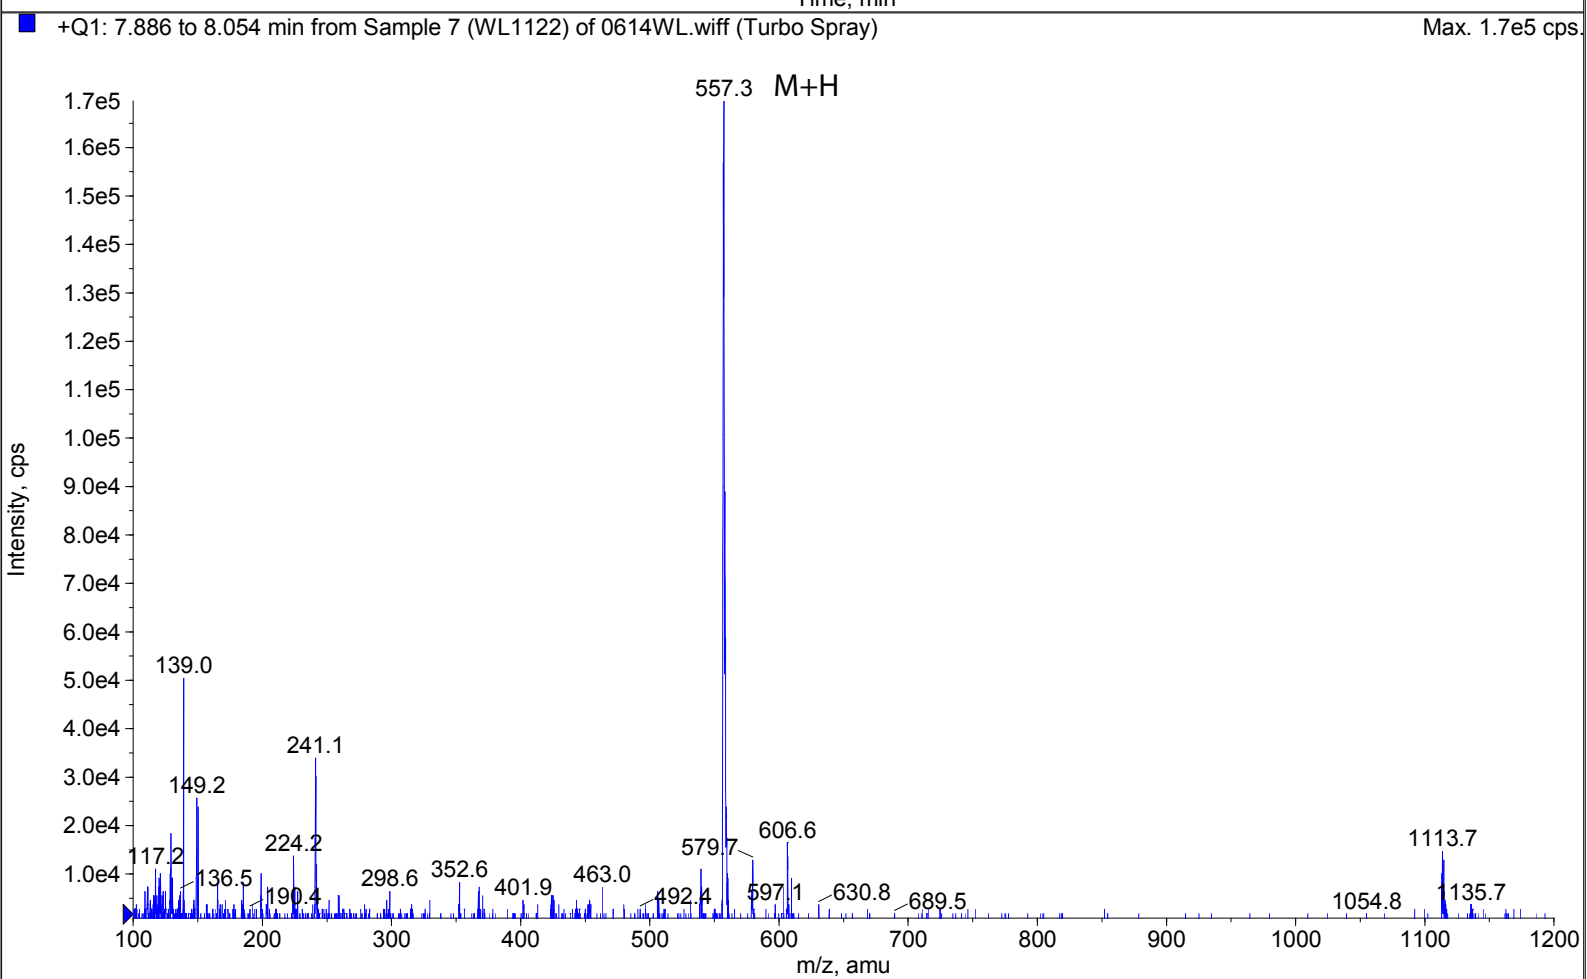

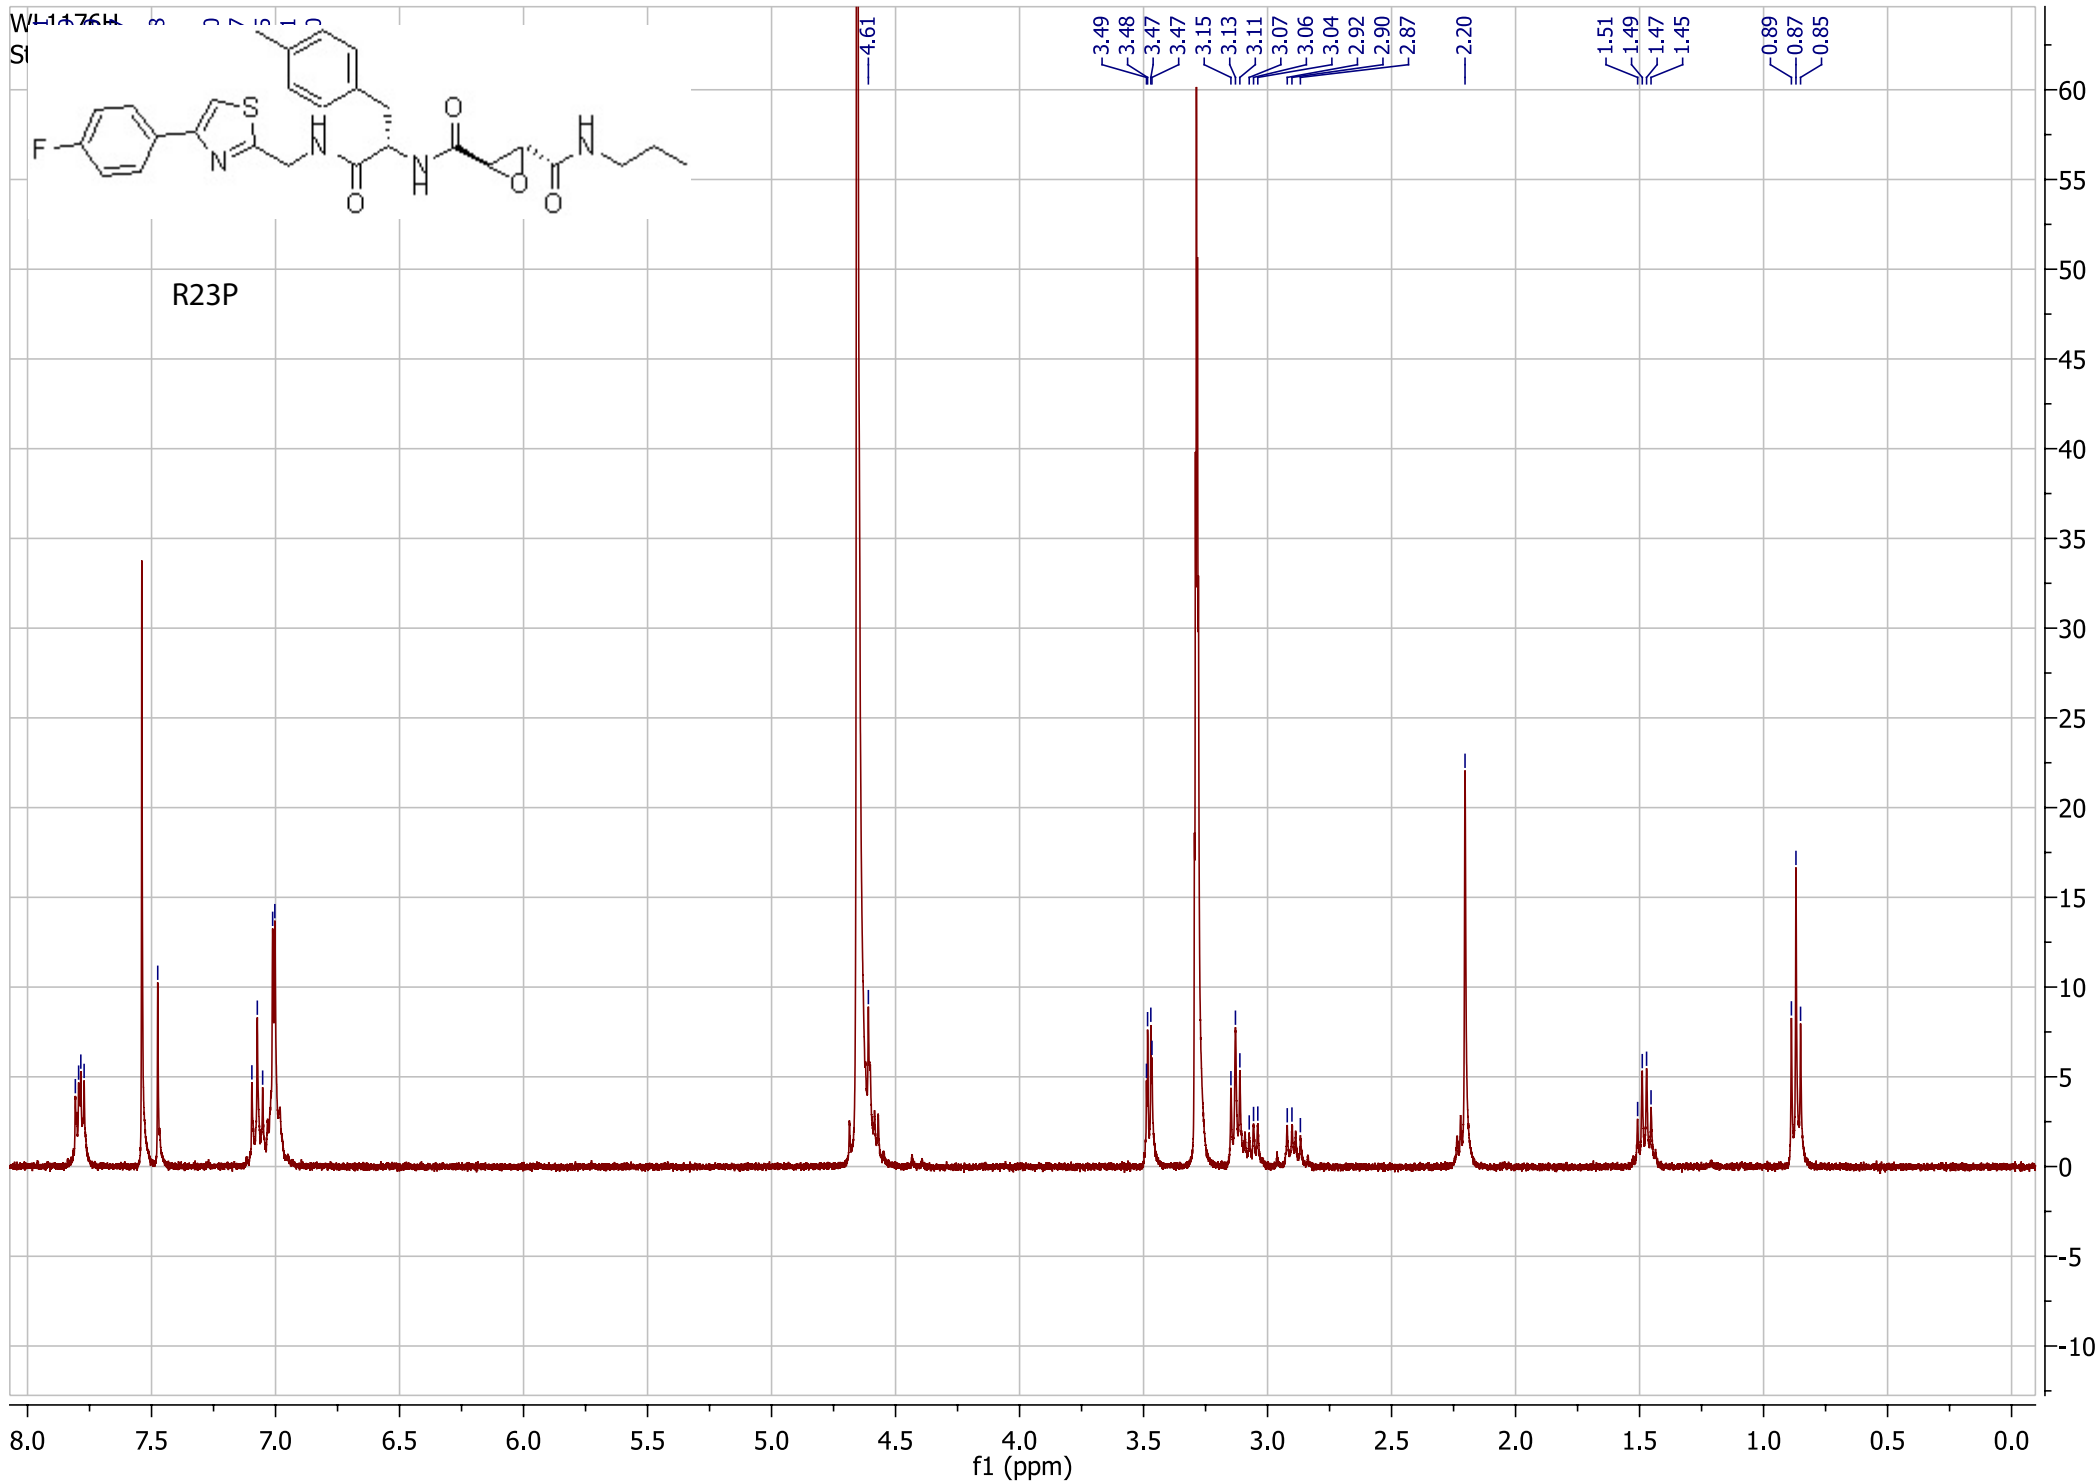



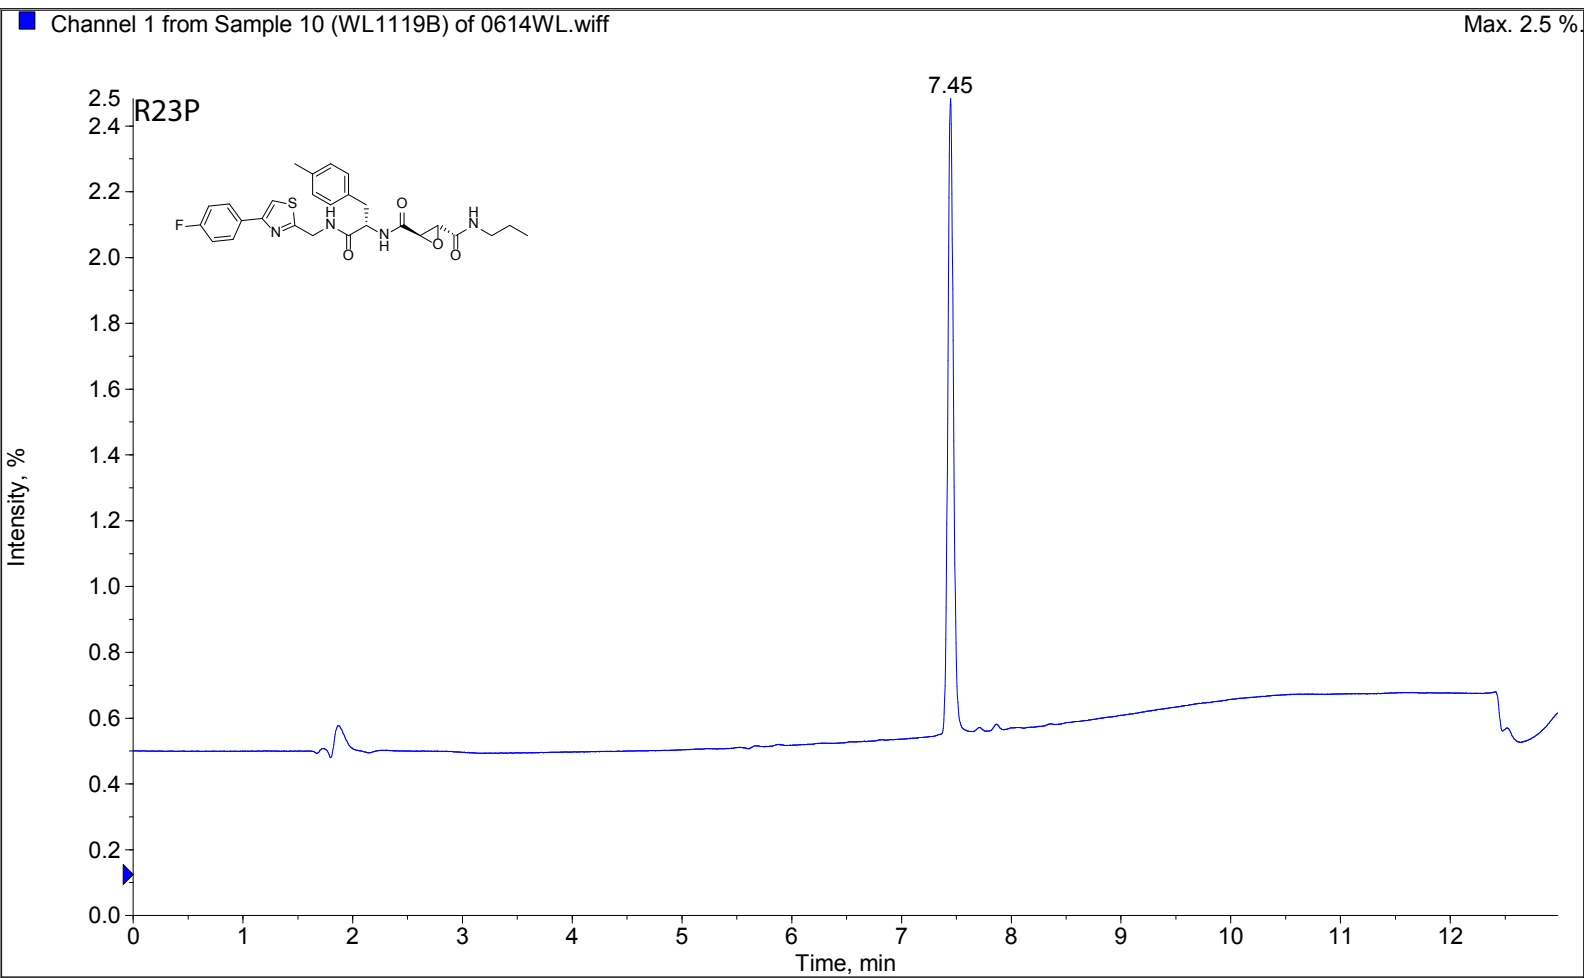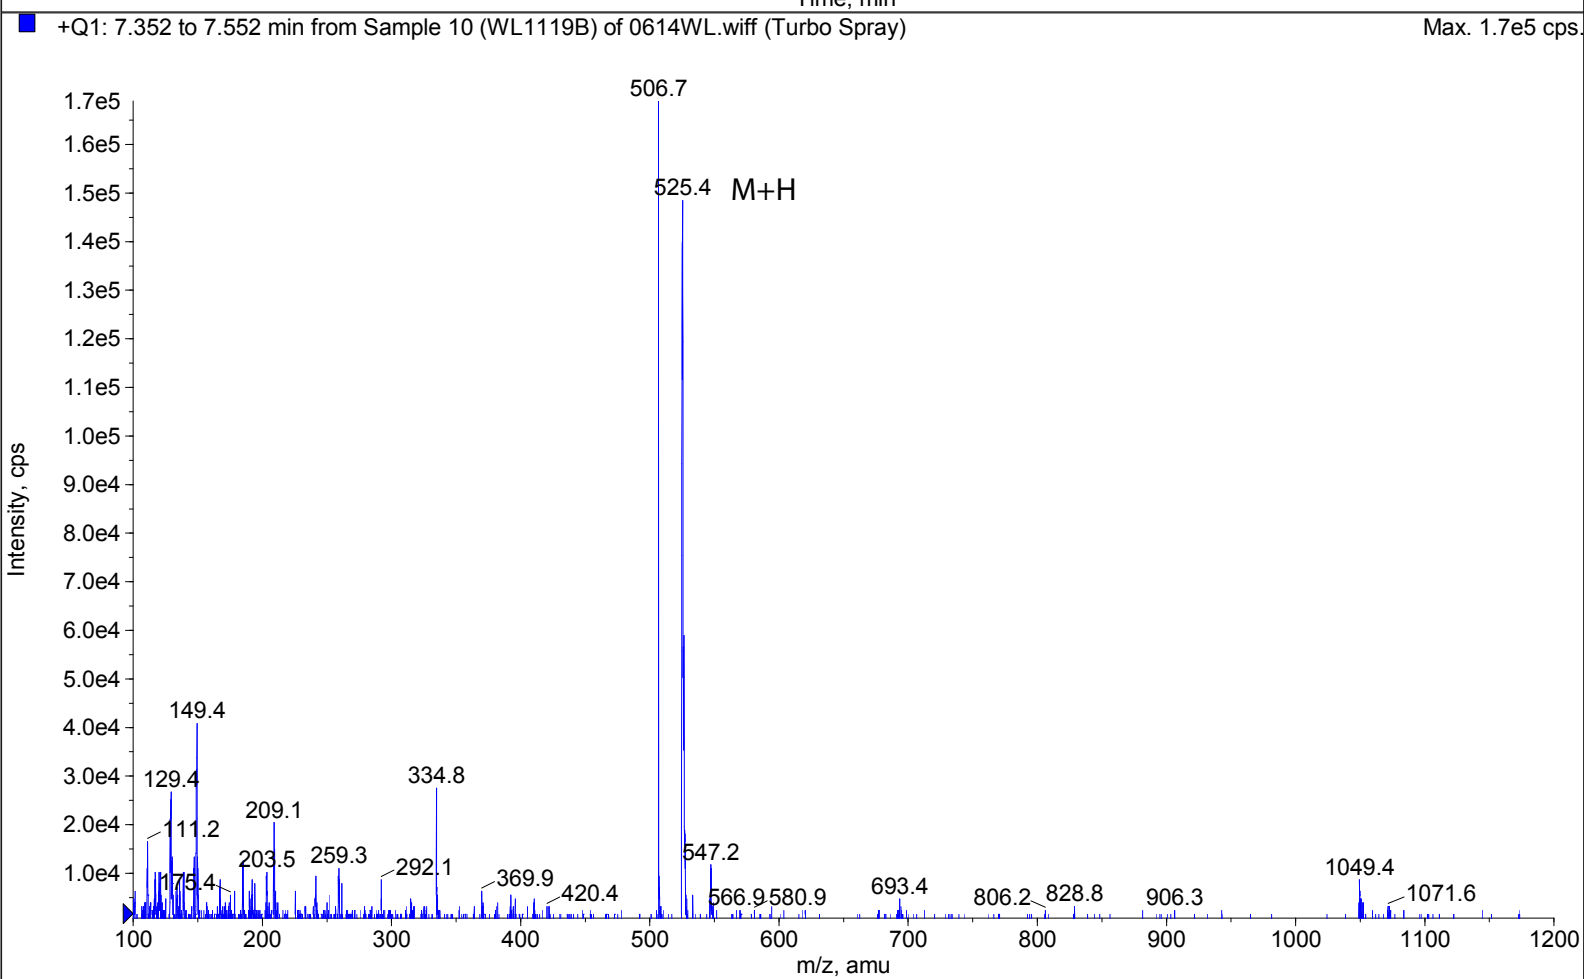

Supplement: NIHMS794982-supplement-Supporting_Information.pdf [file NIHMS794982-supplement-Supporting_Information.pdf]
